# Supplementary material for: Squaramide-catalyzed asymmetric Mannich reactions between 3-fluorooxindoles and pyrazolinone ketimines
Source: Royal Society of Chemistry journal article supplement (doi:10.1039/c9ob01350d), 2019-01-01
Supplement: c9ob01350d1.pdf [file c9ob01350d1.pdf]

# Squaramide-Catalyzed Asymmetric Mannich Reactions Between 3-Fluorooxindoles and Pyrazolinone Ketimines

Qing-Da Zhang, Bo-Liang Zhao, Bing-Yu Li and Da-Ming Du\*

*School of Chemistry and Chemical Engineering, Beijing Institute of Technology,  
Beijing 100081, People's Republic of China*

[dudm@bit.edu.cn](mailto:dudm@bit.edu.cn)

## *Supporting Information*

### **Contents**

1. General information and starting materials.....S1
2. General procedure for the synthesis of compound **3**.....S2
3. Copies of <sup>1</sup>H, <sup>13</sup>C and <sup>19</sup>F NMR spectra of new products.....S3
4. Copies of HPLC chromatograms of products.....S82

## 1. General information and starting materials

**General information.** All solvents commercially and available chemicals were used without further purification. The column chromatography was performed with silica gel (200–300 mesh) using mixtures of petroleum ether and ethyl acetate. Melting points were determined with a XT-4 melting-point apparatus without corrected.  $^1\text{H}$  NMR spectra were measured with Bruker Ascend 400 MHz spectrometer, and chemical shifts were reported in  $\delta$  (ppm) units relative to tetramethylsilane (TMS) as the internal standard.  $^{13}\text{C}$  NMR spectra were measured at 101 MHz with Bruker Ascend 400 MHz spectrometer or 176 MHz with Bruker Avance III HD 700 MHz spectrometer, and chemical shifts are reported in  $\delta$  (ppm) units relative to tetramethylsilane and referenced to the solvent peak ( $\text{CDCl}_3$ ,  $\delta(\text{C}) = 77.00$  ppm).  $^{19}\text{F}$  NMR spectra were measured at 376 MHz with Bruker Ascend 400 MHz spectrometer. Proton coupling patterns are described as singlet (s), doublet (d), triplet (t), quartet (q), multiplet (m), and broad (br). High-resolution mass spectra were obtained with an Agilent 6520 Accurate-Mass-Q-TOF MS system equipped with an electrospray ionization (ESI) source. The enantiomeric excesses were determined by chiral HPLC analysis using an Agilent 1200 LC instrument with Daicel Chiralpak IA, IB, IC or AD-H columns. Optical rotations were measured with Krüss P8000 polarimeter at the indicated concentration with the units of grams per 100 mL at 20 °C using sodium D light.

**Starting materials.** **1a–1p** were prepared according to the literature.<sup>[1]</sup>

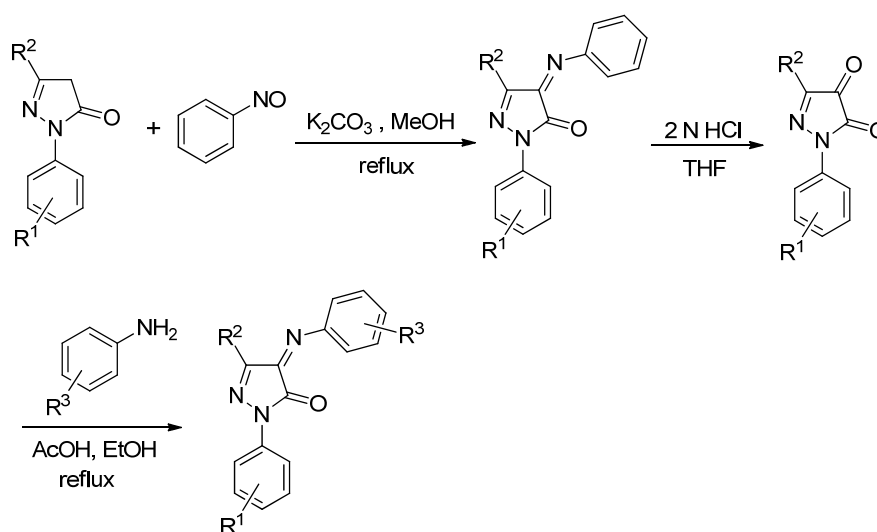

**2a–2h** were prepared according to the literature.<sup>[2]</sup>

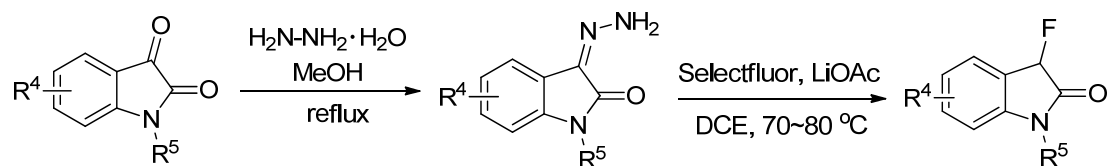

The squaramide organocatalysts **C1–C8** were prepared by the reported procedures.<sup>[3]</sup>

## 2. General procedure for the synthesis of compound **3**

To a dried small bottle were added pyrazolone imine **1** (0.22mmol), 3-fluorooxindole **2** (0.2 mmol), and squaramide catalyst **C5** (5 mol%) in MeCN (2.0 mL) at room temperature. The reaction mixture was stirred for 36 h and the progress of the reaction was monitored by TLC analysis (Petroleum ether/ ethyl acetate = 2:1). After the completion of the reaction, the crude product mixture was purified by flash column chromatography on silica (petroleum ether/ethyl acetate = 5:1) to afford the pure product **3**. The racemic standard of **3** was prepared using achiral catalyst **C9**.<sup>[4]</sup>

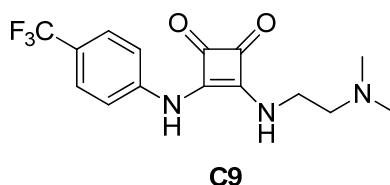

## References

- [1] P. Chauhan, S. Mahajan, U. Kaya, A. Peuronen and K. Rissanen, *J. Org. Chem.* 2017, **82**, 7050.
- [2] Q. Yang, G. -L. Dai, Y.-M. Yang, Z.-Z. Luo and Z.-Y. Tang, *J. Org. Chem.* 2018, **83**, 6762.
- [3] (a) Y. Zhu, J. P. Malerich and V. -H. Rawal, *Angew. Chem., Int. Ed.* 2010, **49**, 153; (b) W. Yang and D.-M. Du, *Org. Lett.* 2010, **12**, 5450; (c) C. Cassani, R.-M. Rapún, E. Arceol, F. Bravo and P. Melchiorre, *Nat. Protoc.* 2013, **8**, 325; (d) E. Massolo, M. Benaglia, A. Genoni, R. Annunziata, G. Celentanob and N. Gaggero, *Org. Biomol. Chem.* 2015, **13**, 5591.
- [4] S. Sopena, E. Martin, E. -C. Escuder and A. -W. Kleij, *ACS Catal.* 2017, **7**, 3532.

### 3. Copies of $^1\text{H}$ , $^{13}\text{C}$ and $^{19}\text{F}$ NMR spectra of new products

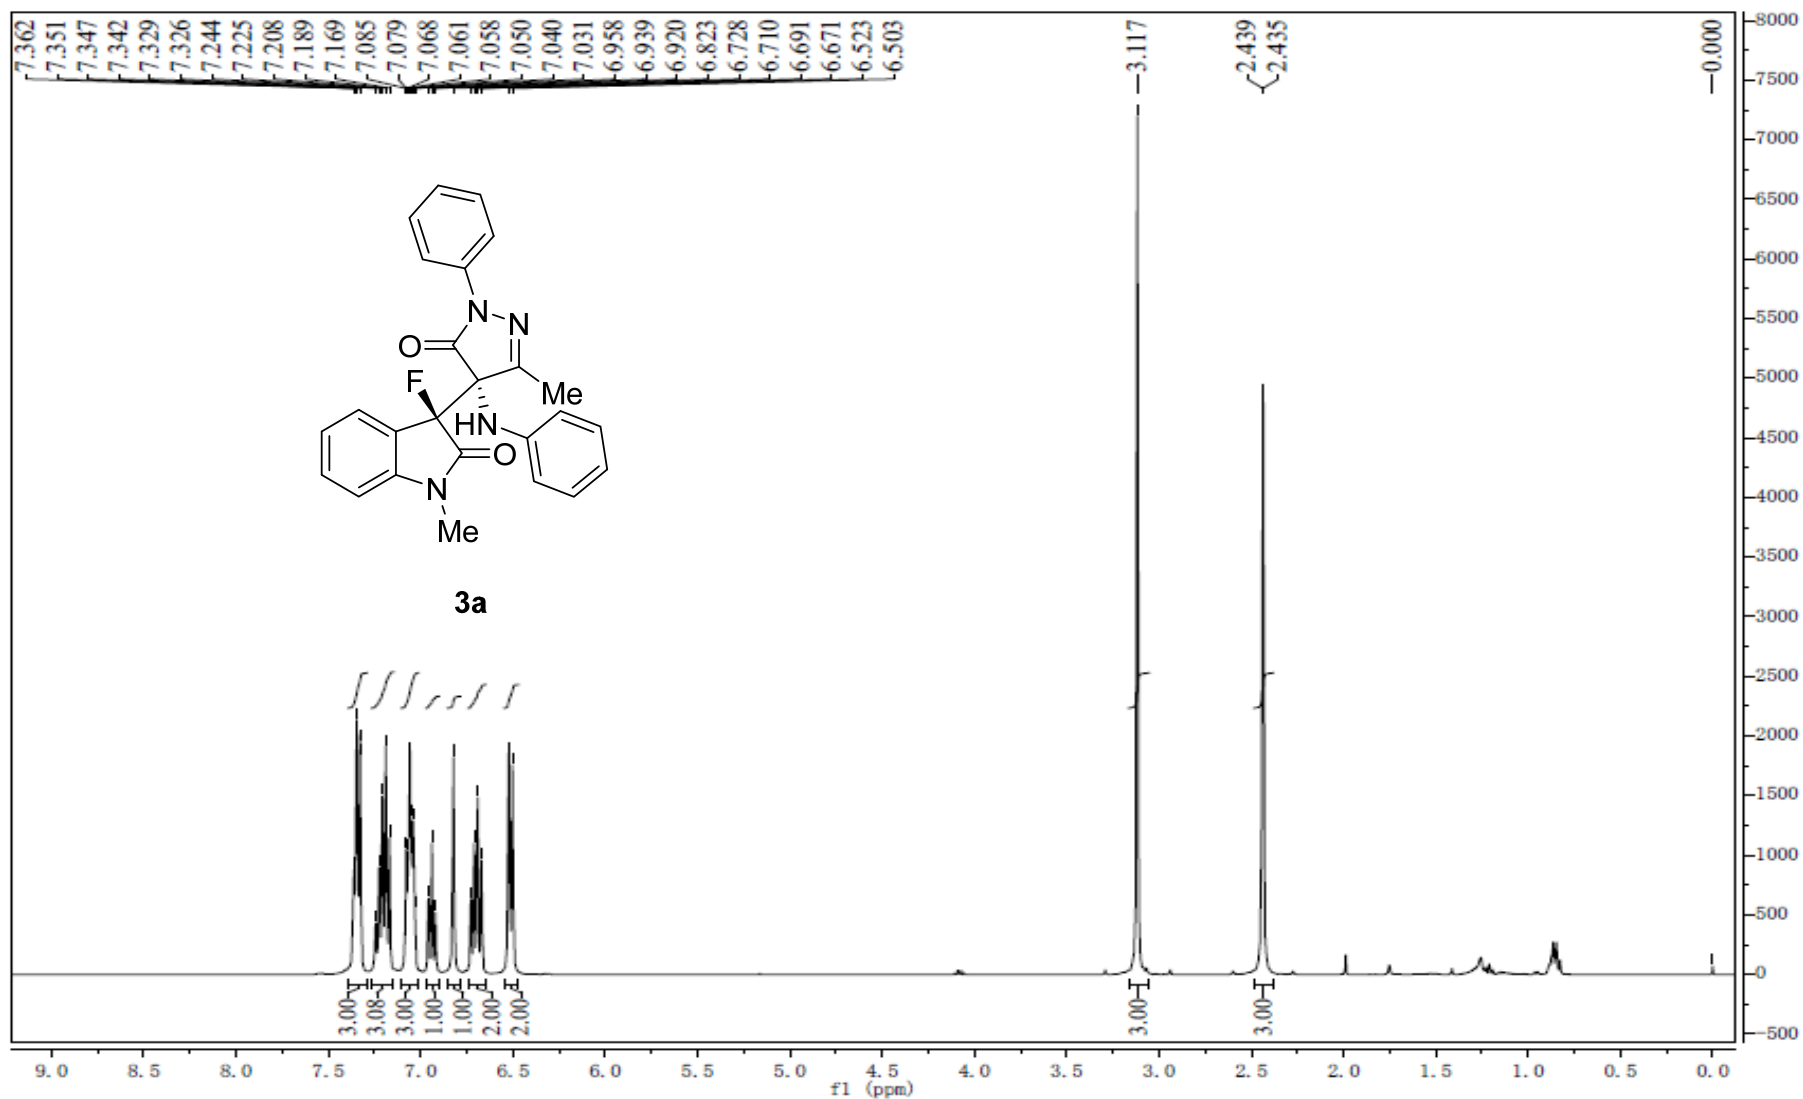

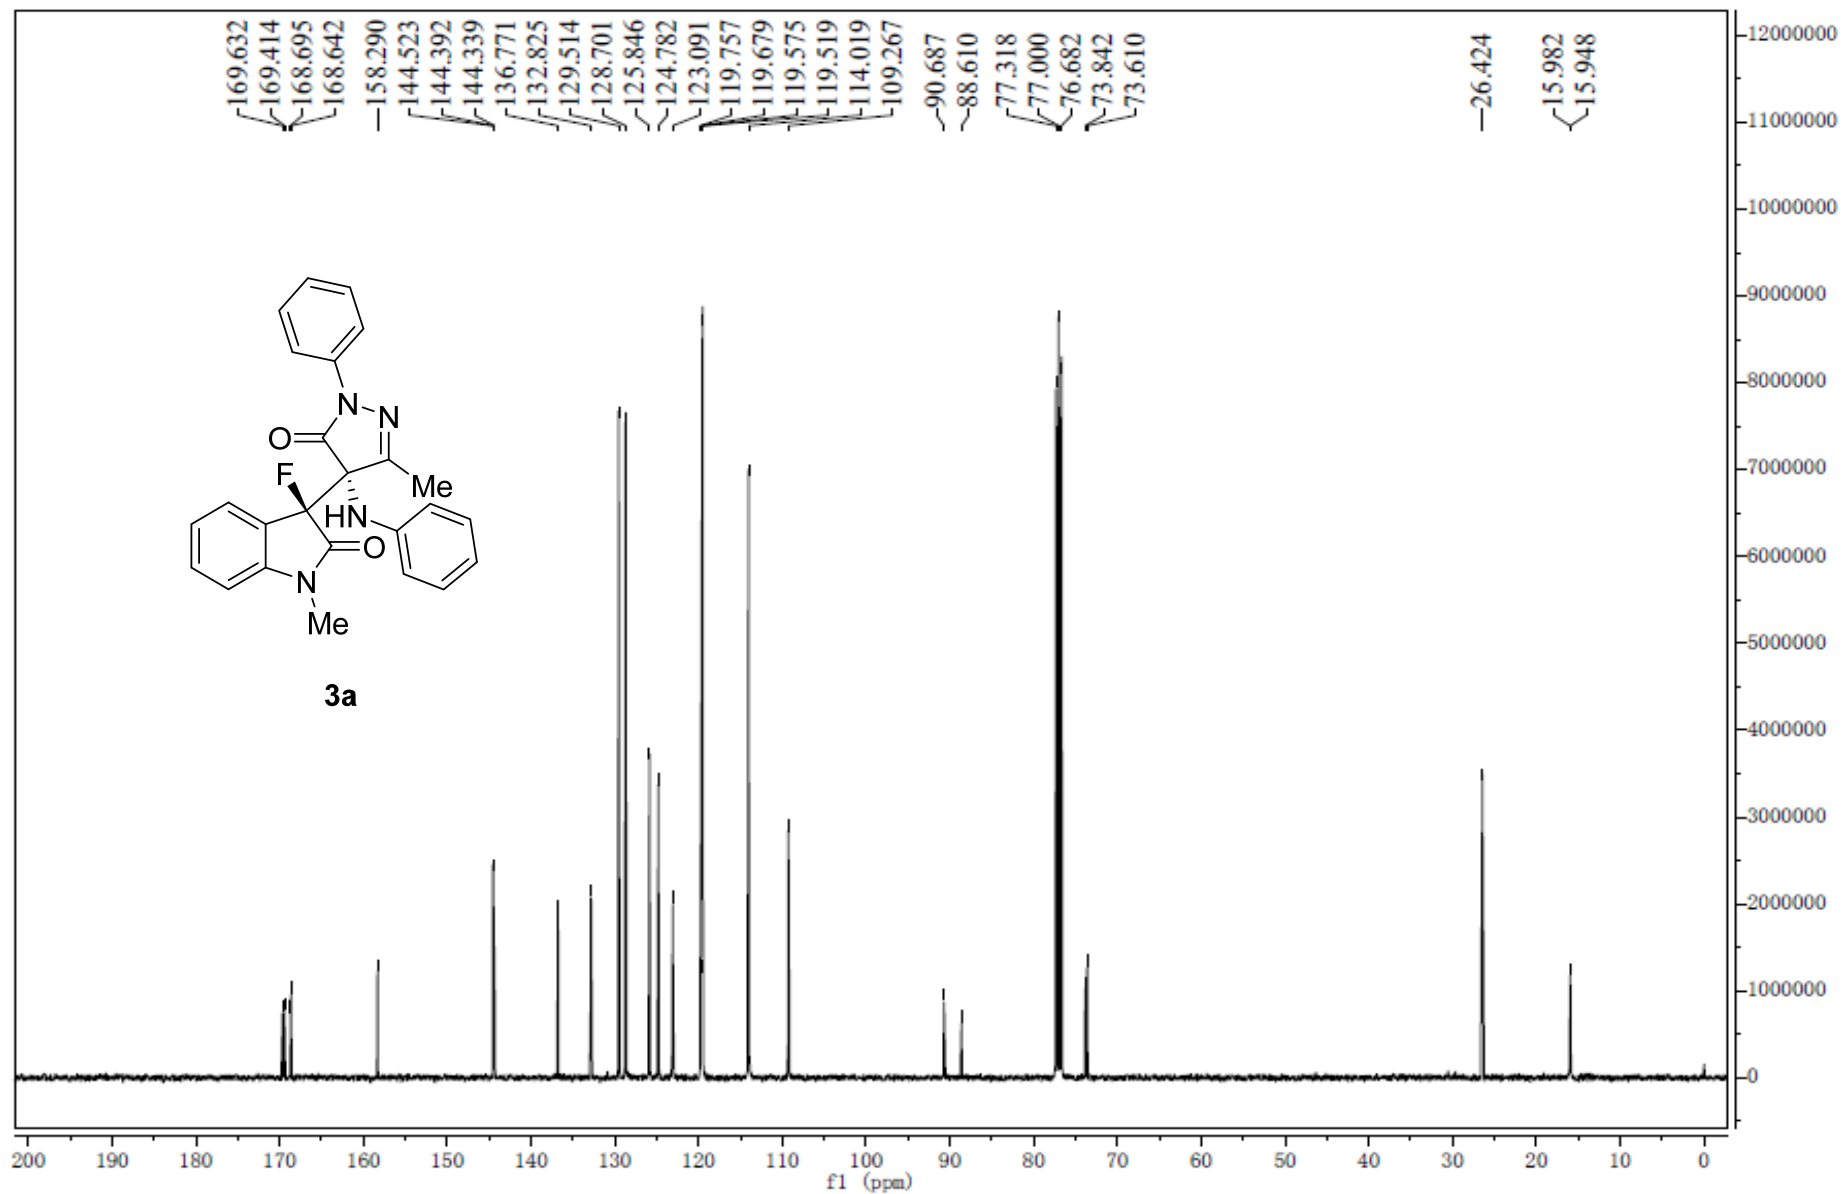

<sup>13</sup>C NMR (101 MHz)

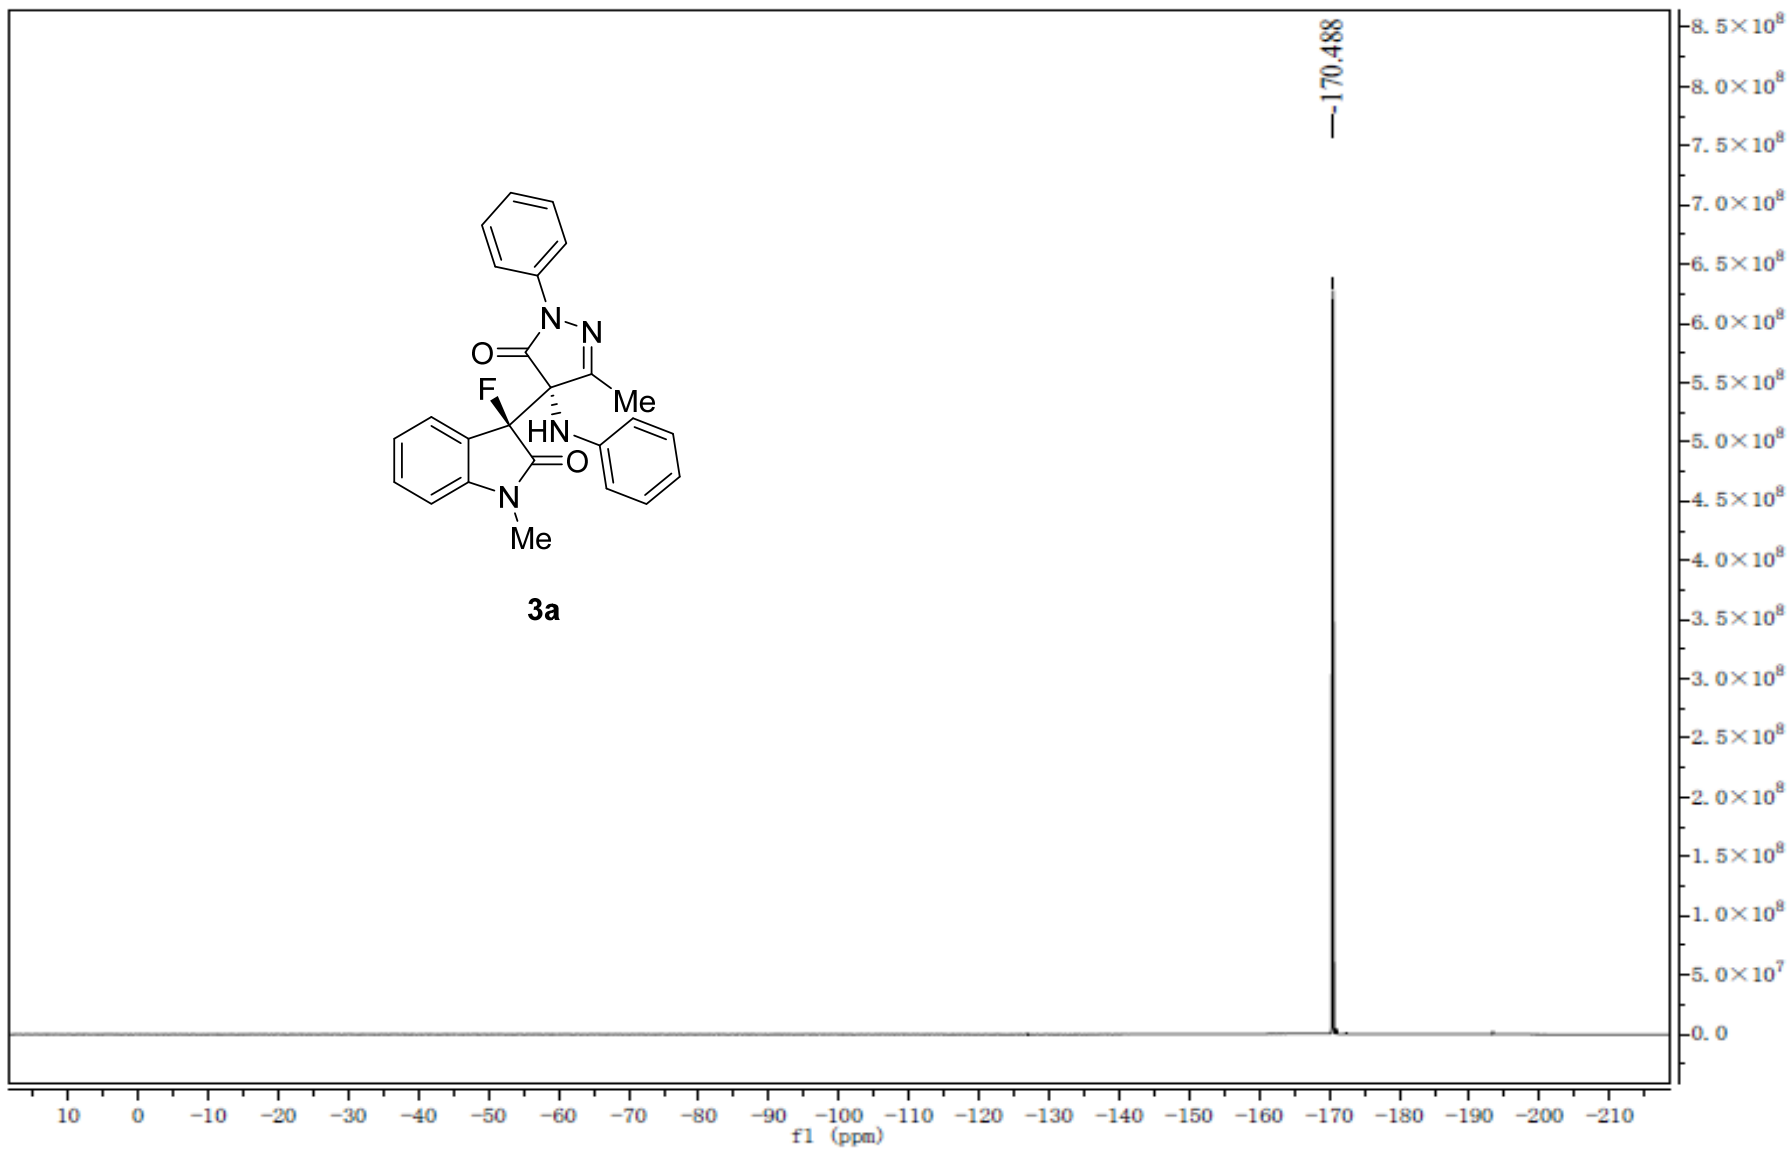

<sup>19</sup>F NMR (376 MHz)

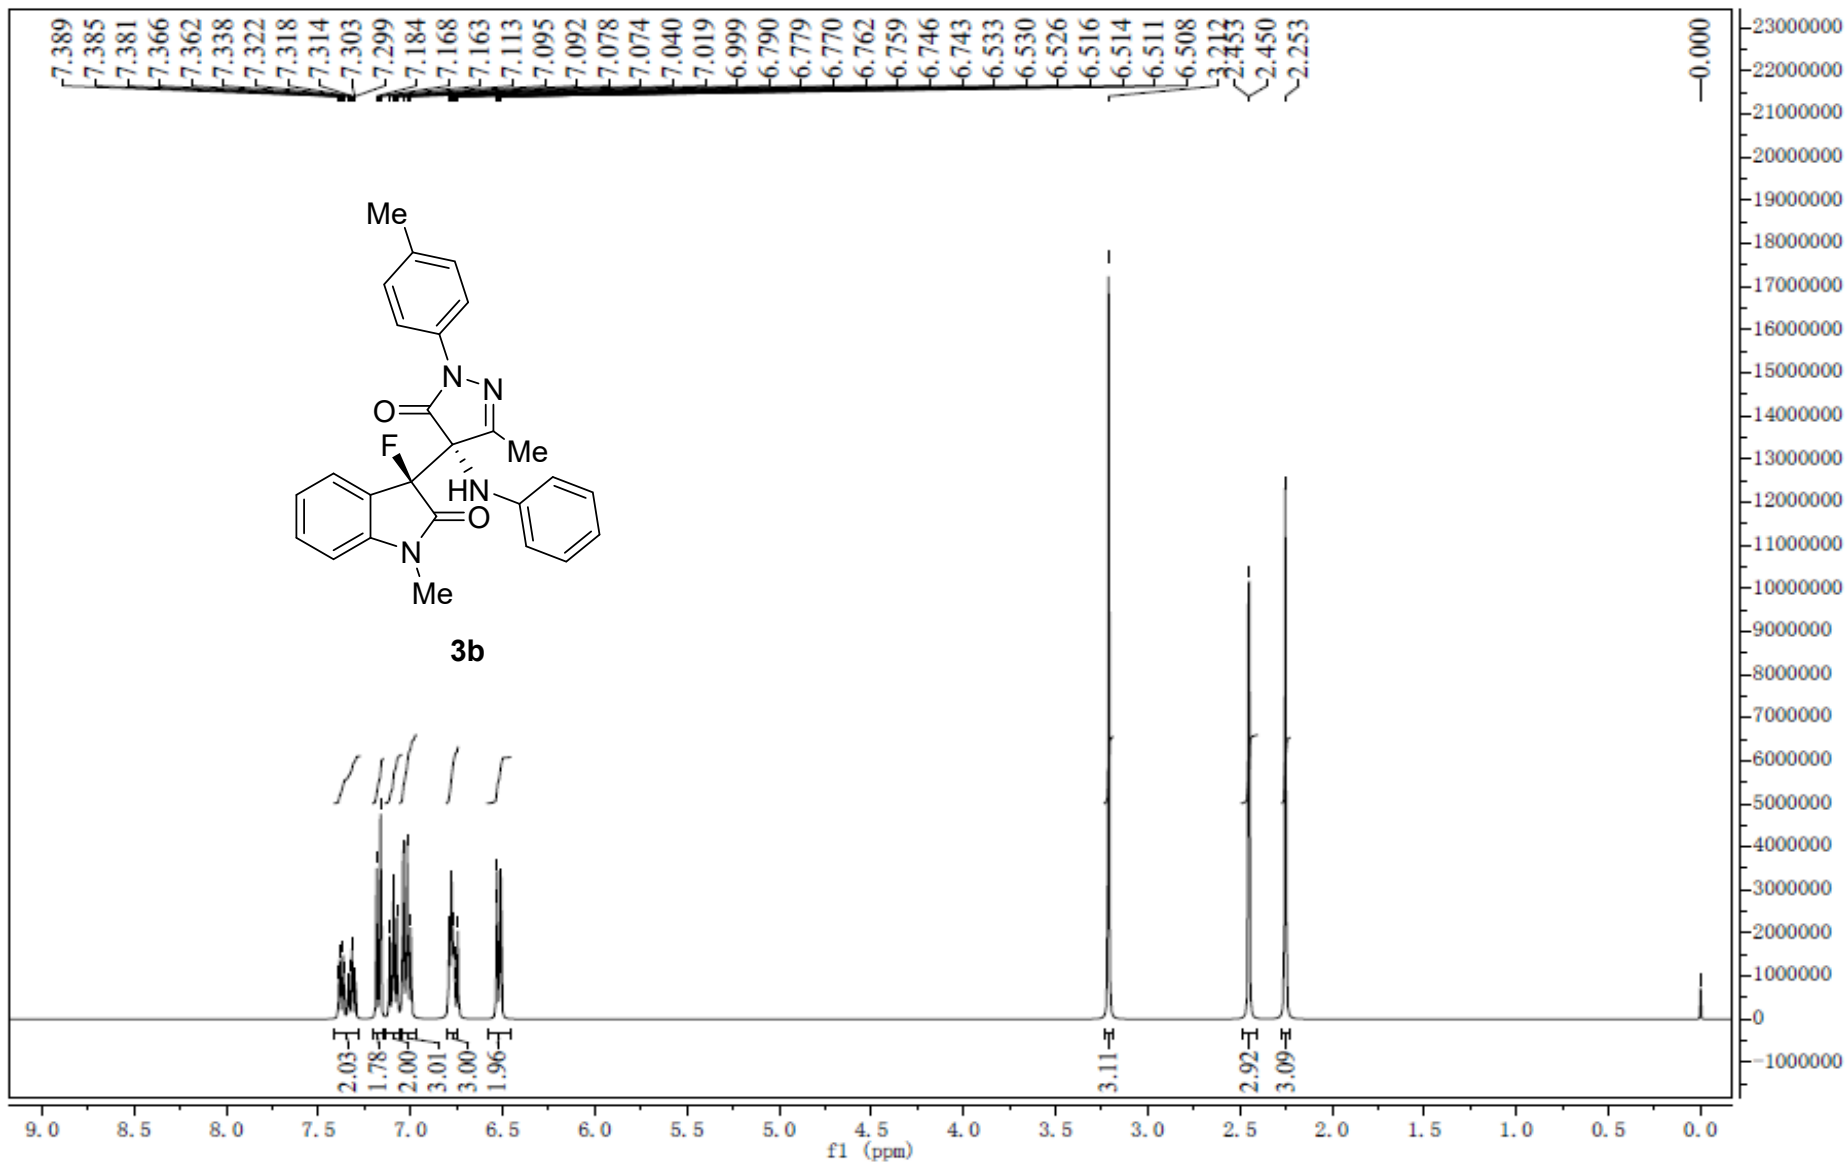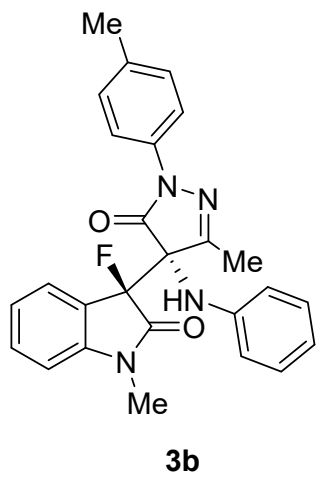

<sup>1</sup>H NMR (400 MHz)

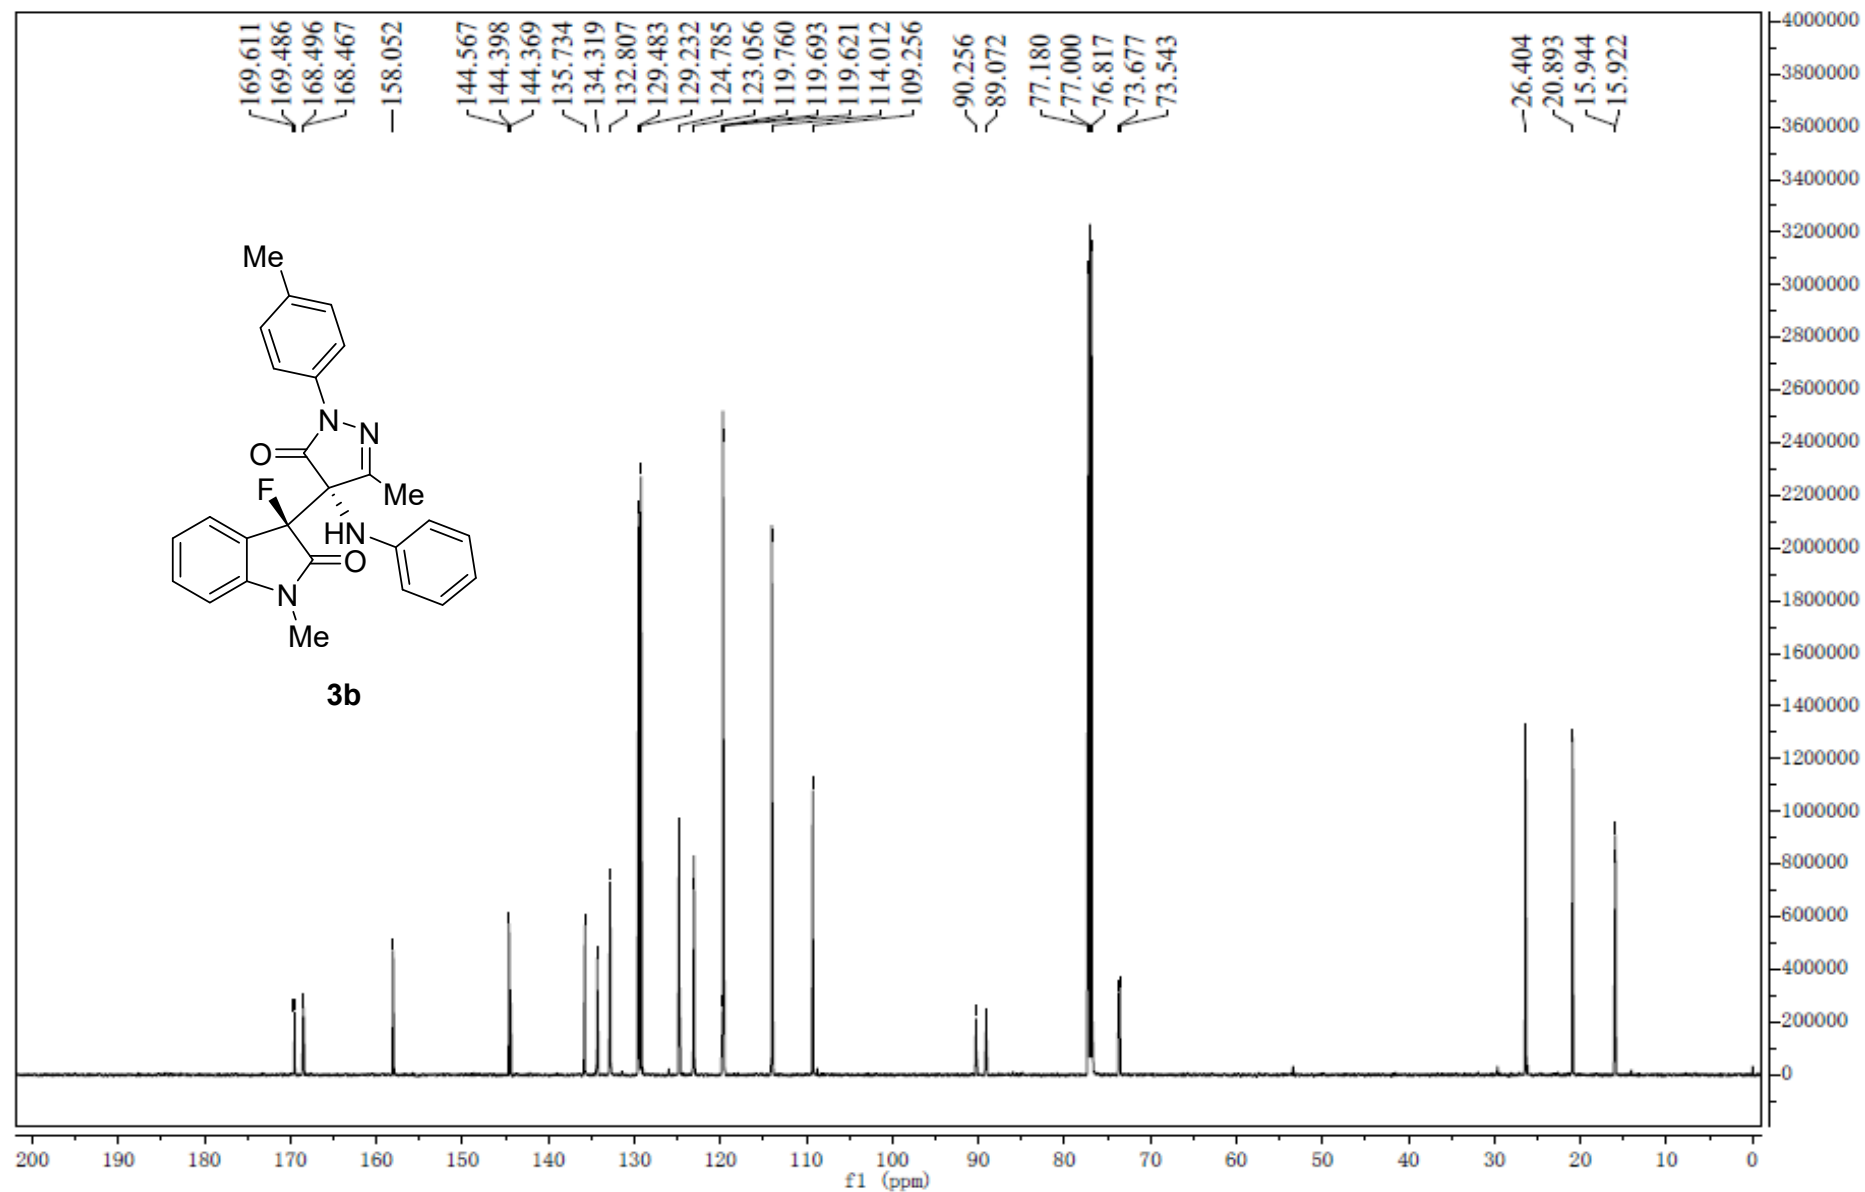

<sup>13</sup>C NMR (176 MHz)



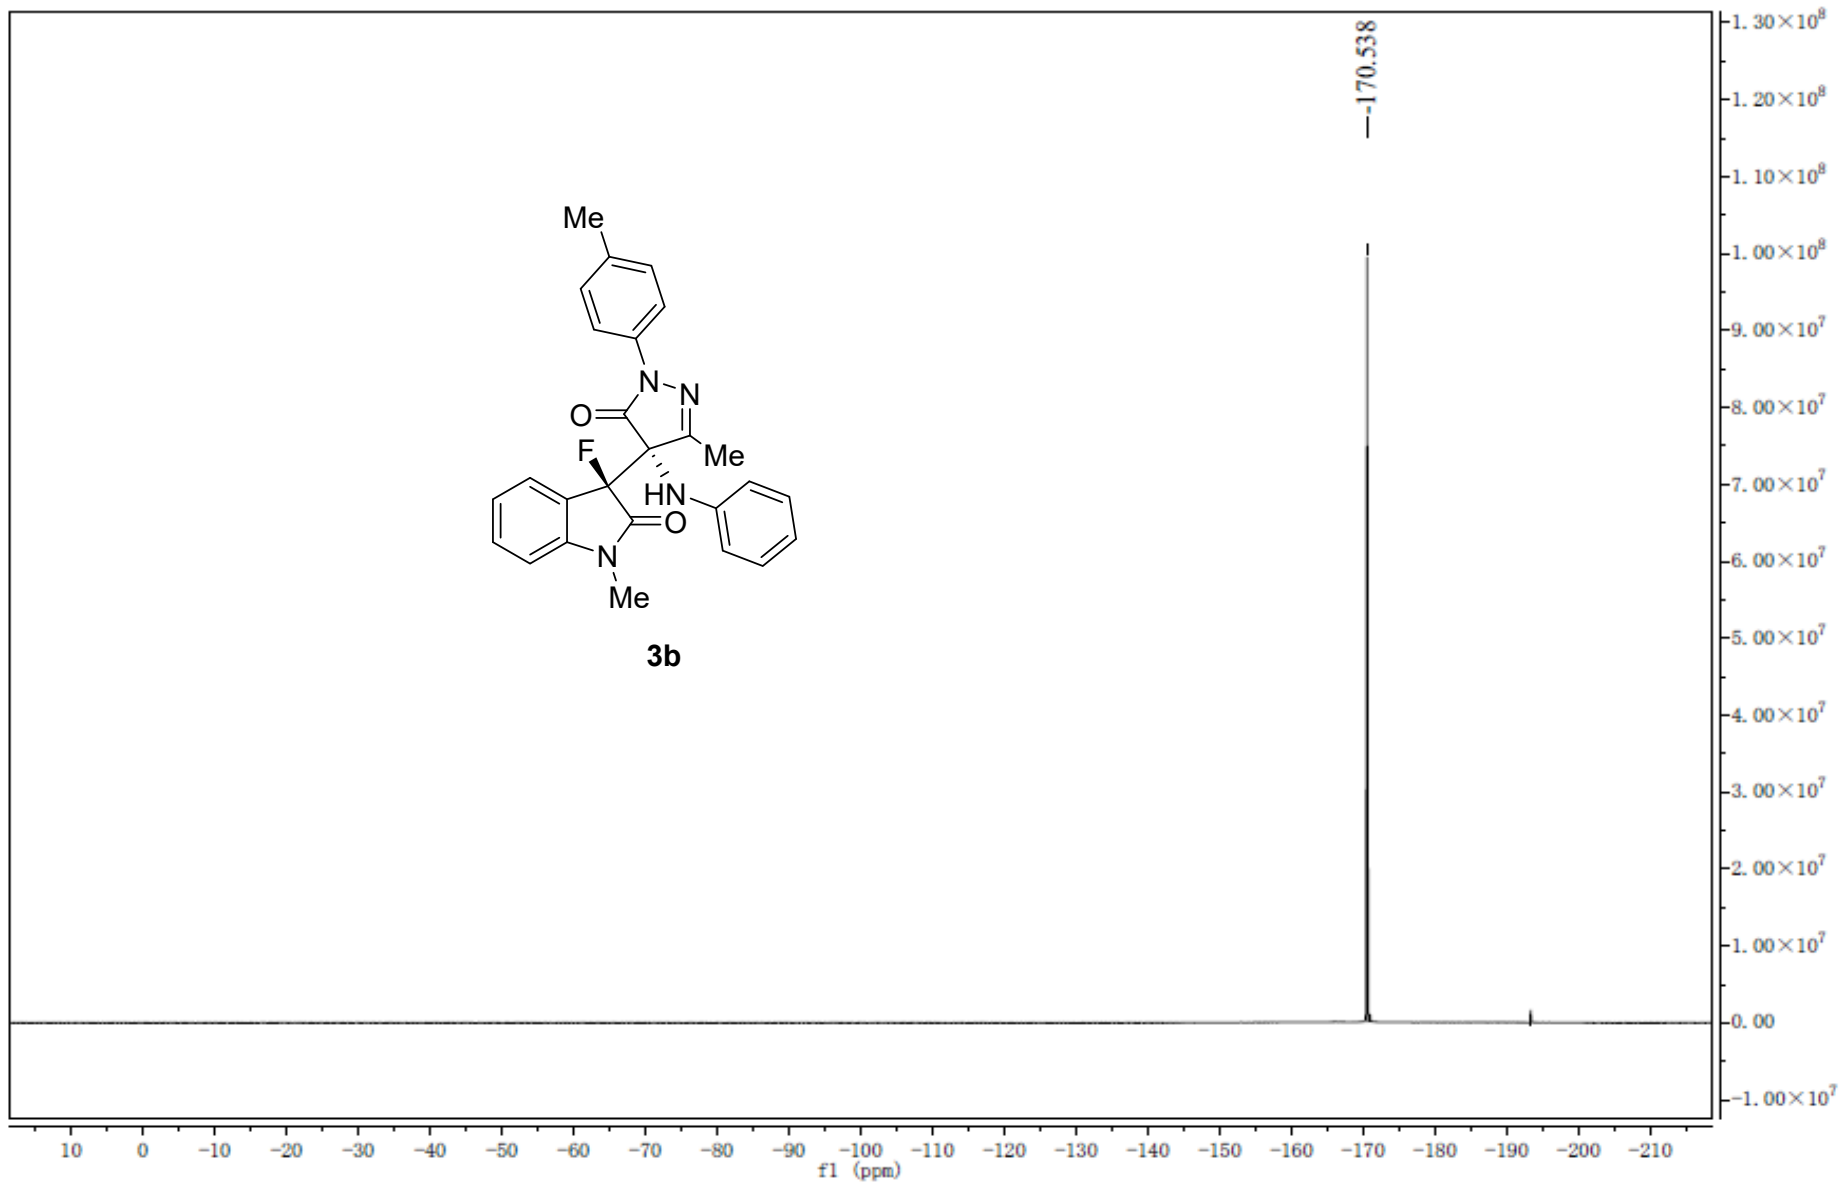

$^{19}\text{F}$  NMR (376 MHz)

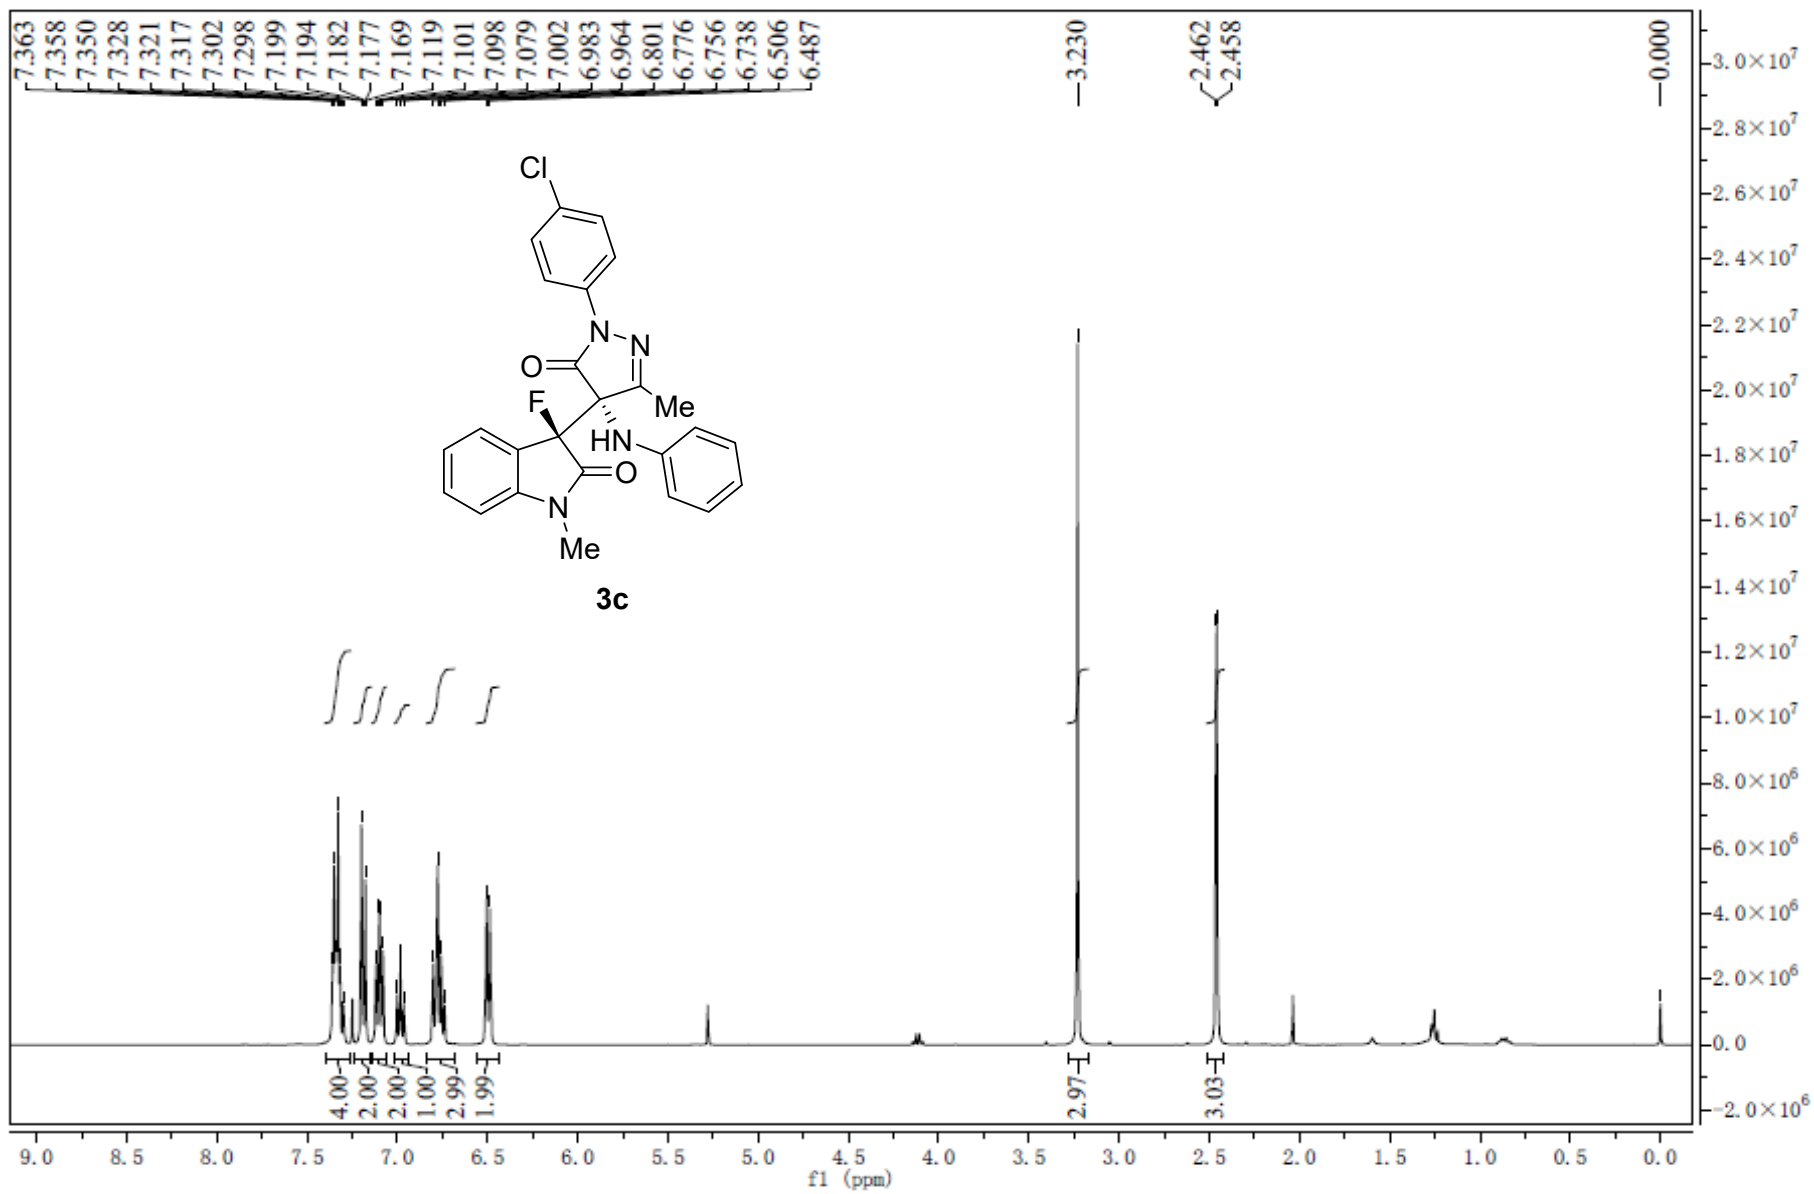

<sup>1</sup>H NMR (400 MHz)

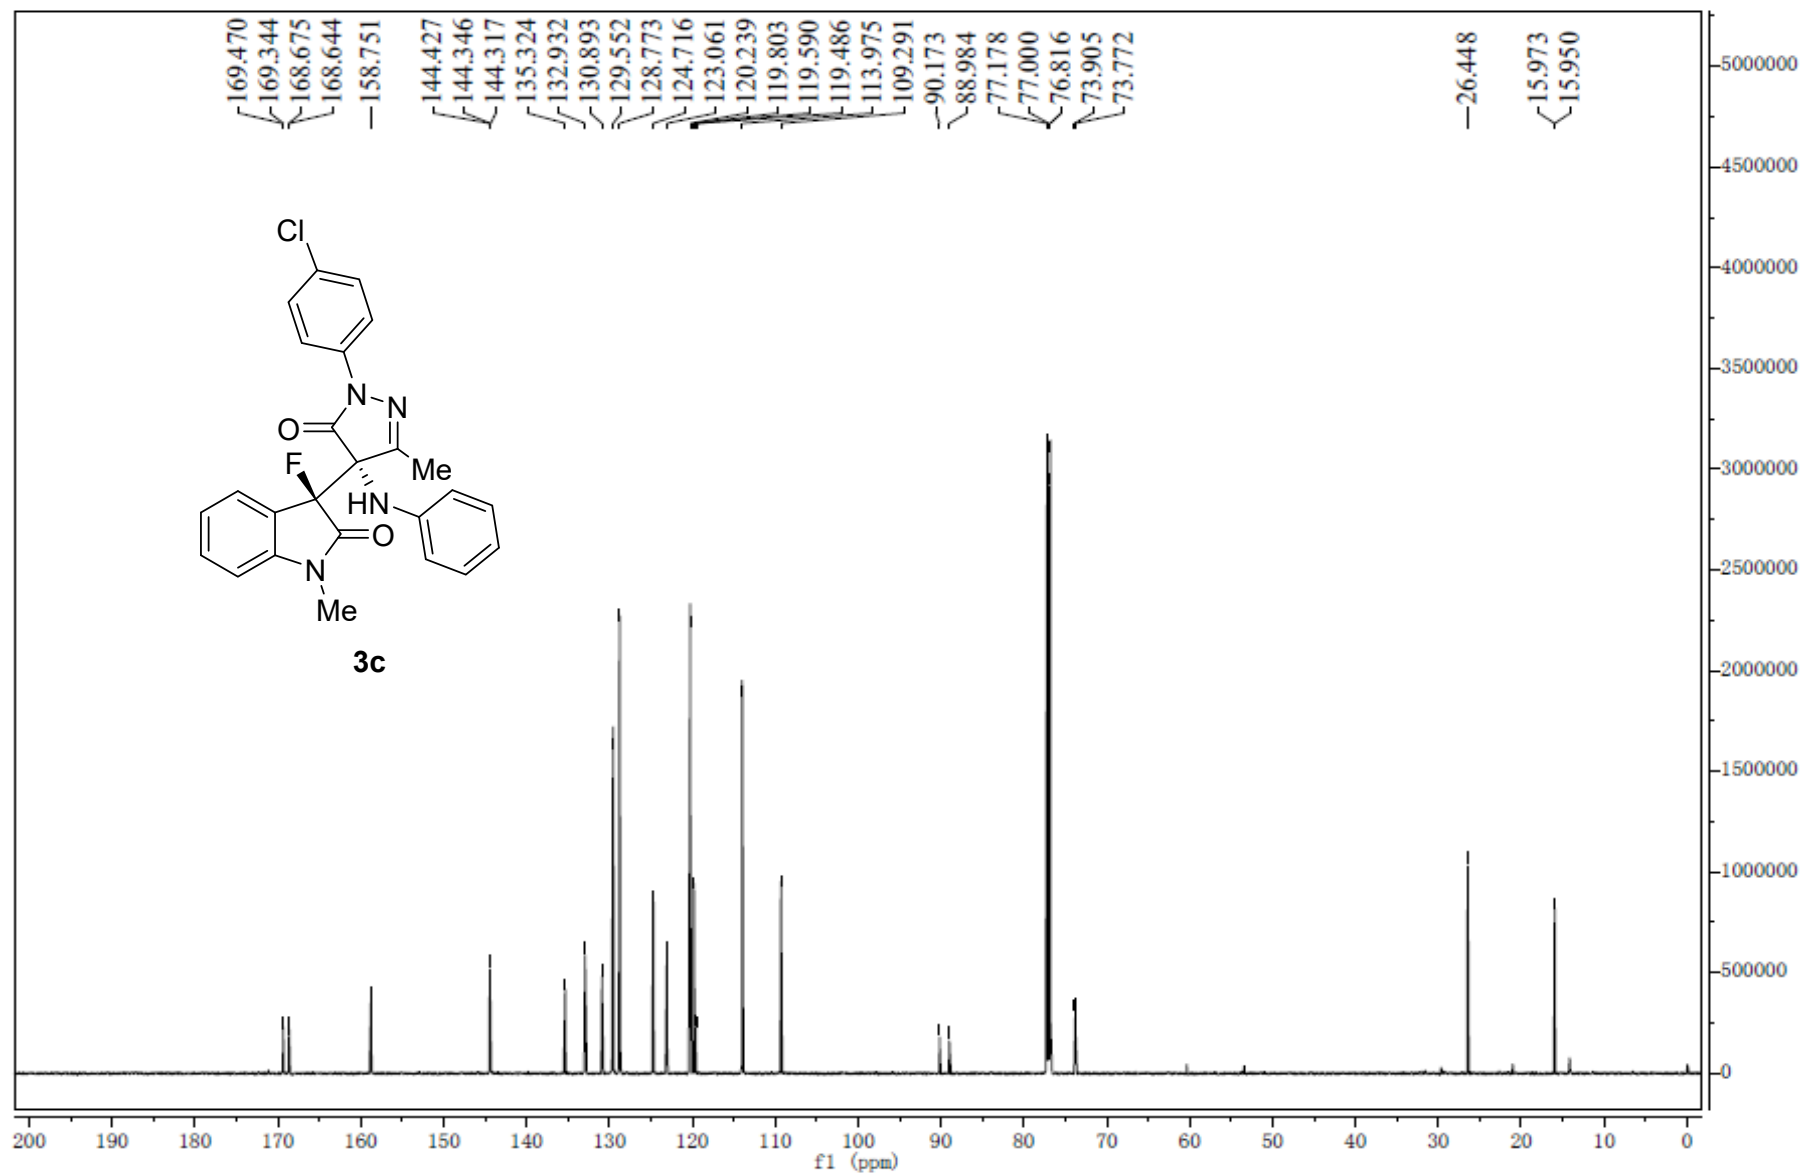

$^{13}\text{C}$  NMR (176 MHz)

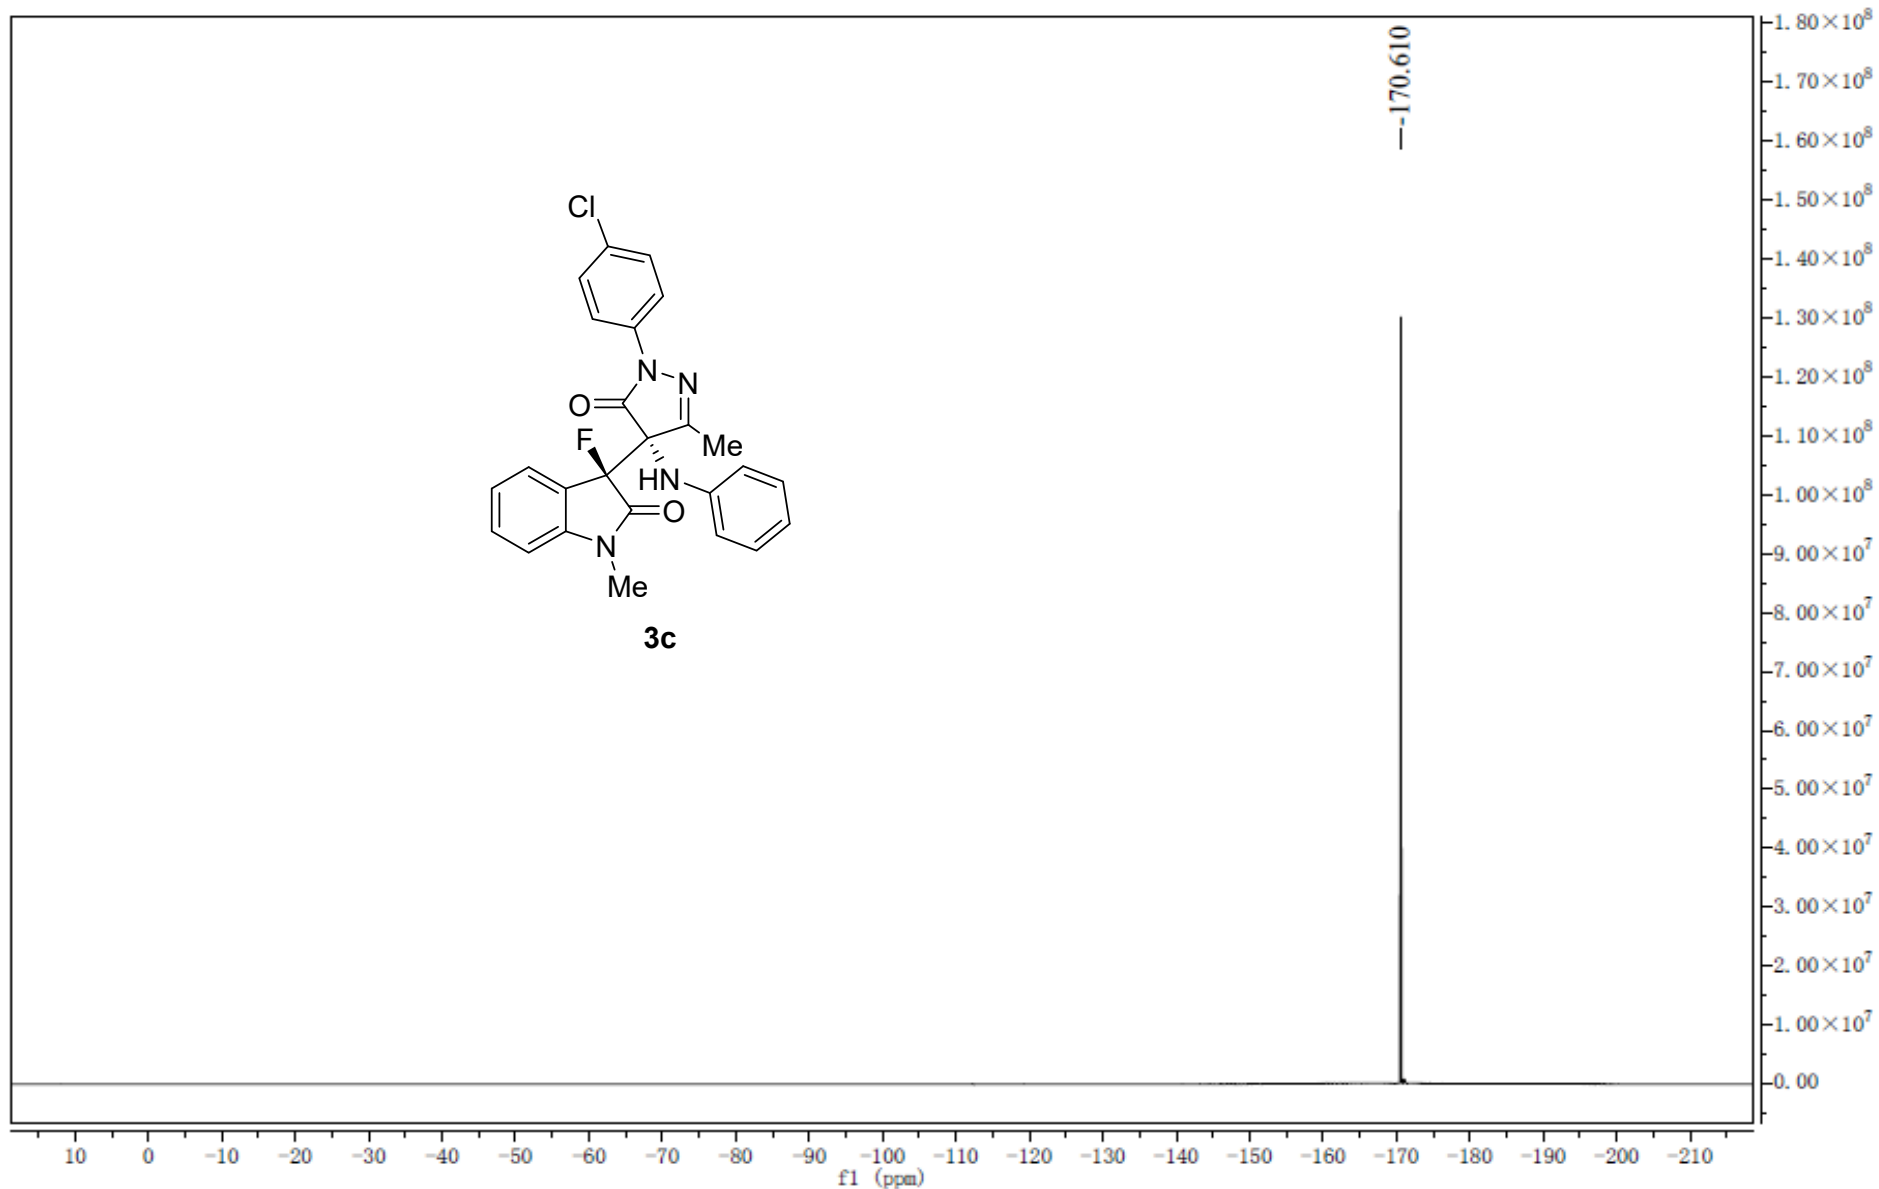

$^{19}\text{F}$  NMR (376 MHz)

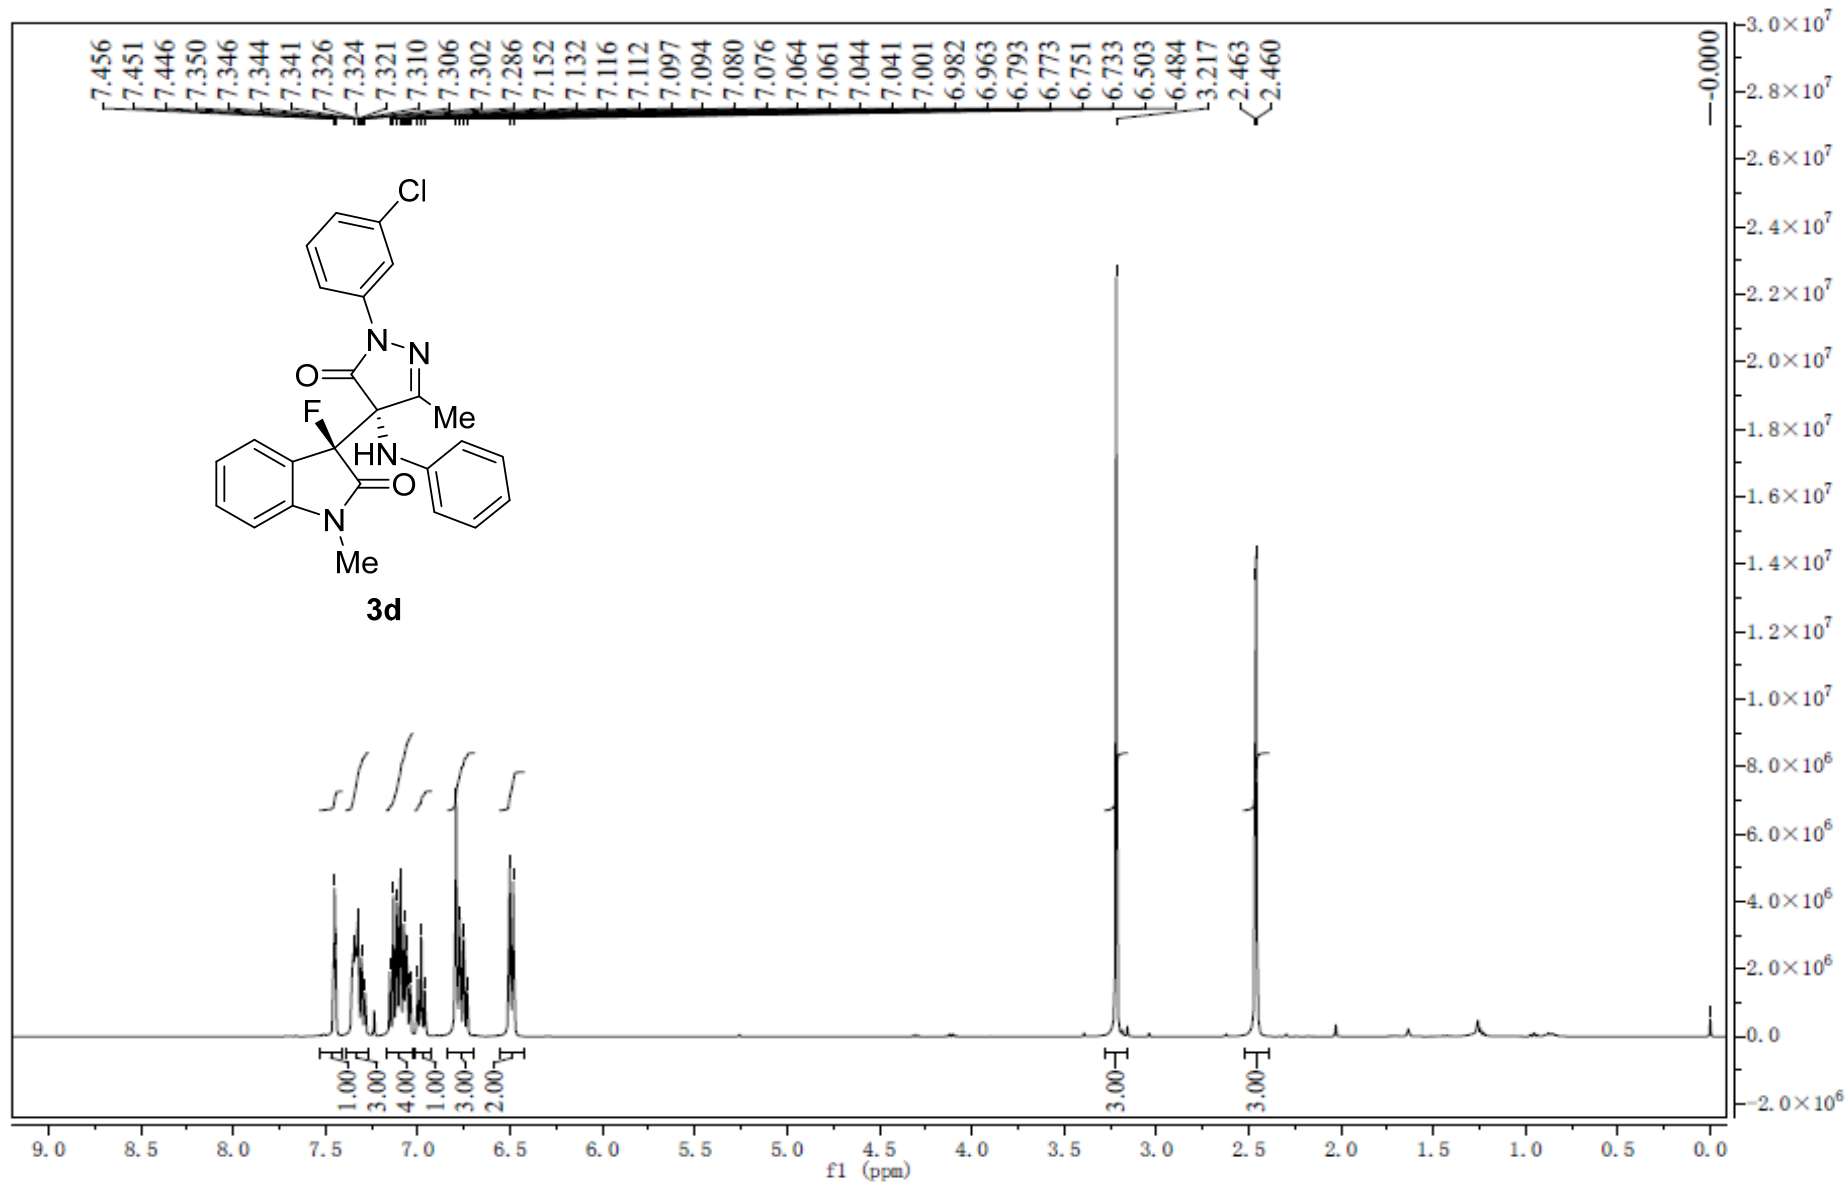

<sup>1</sup>H NMR (400 MHz)

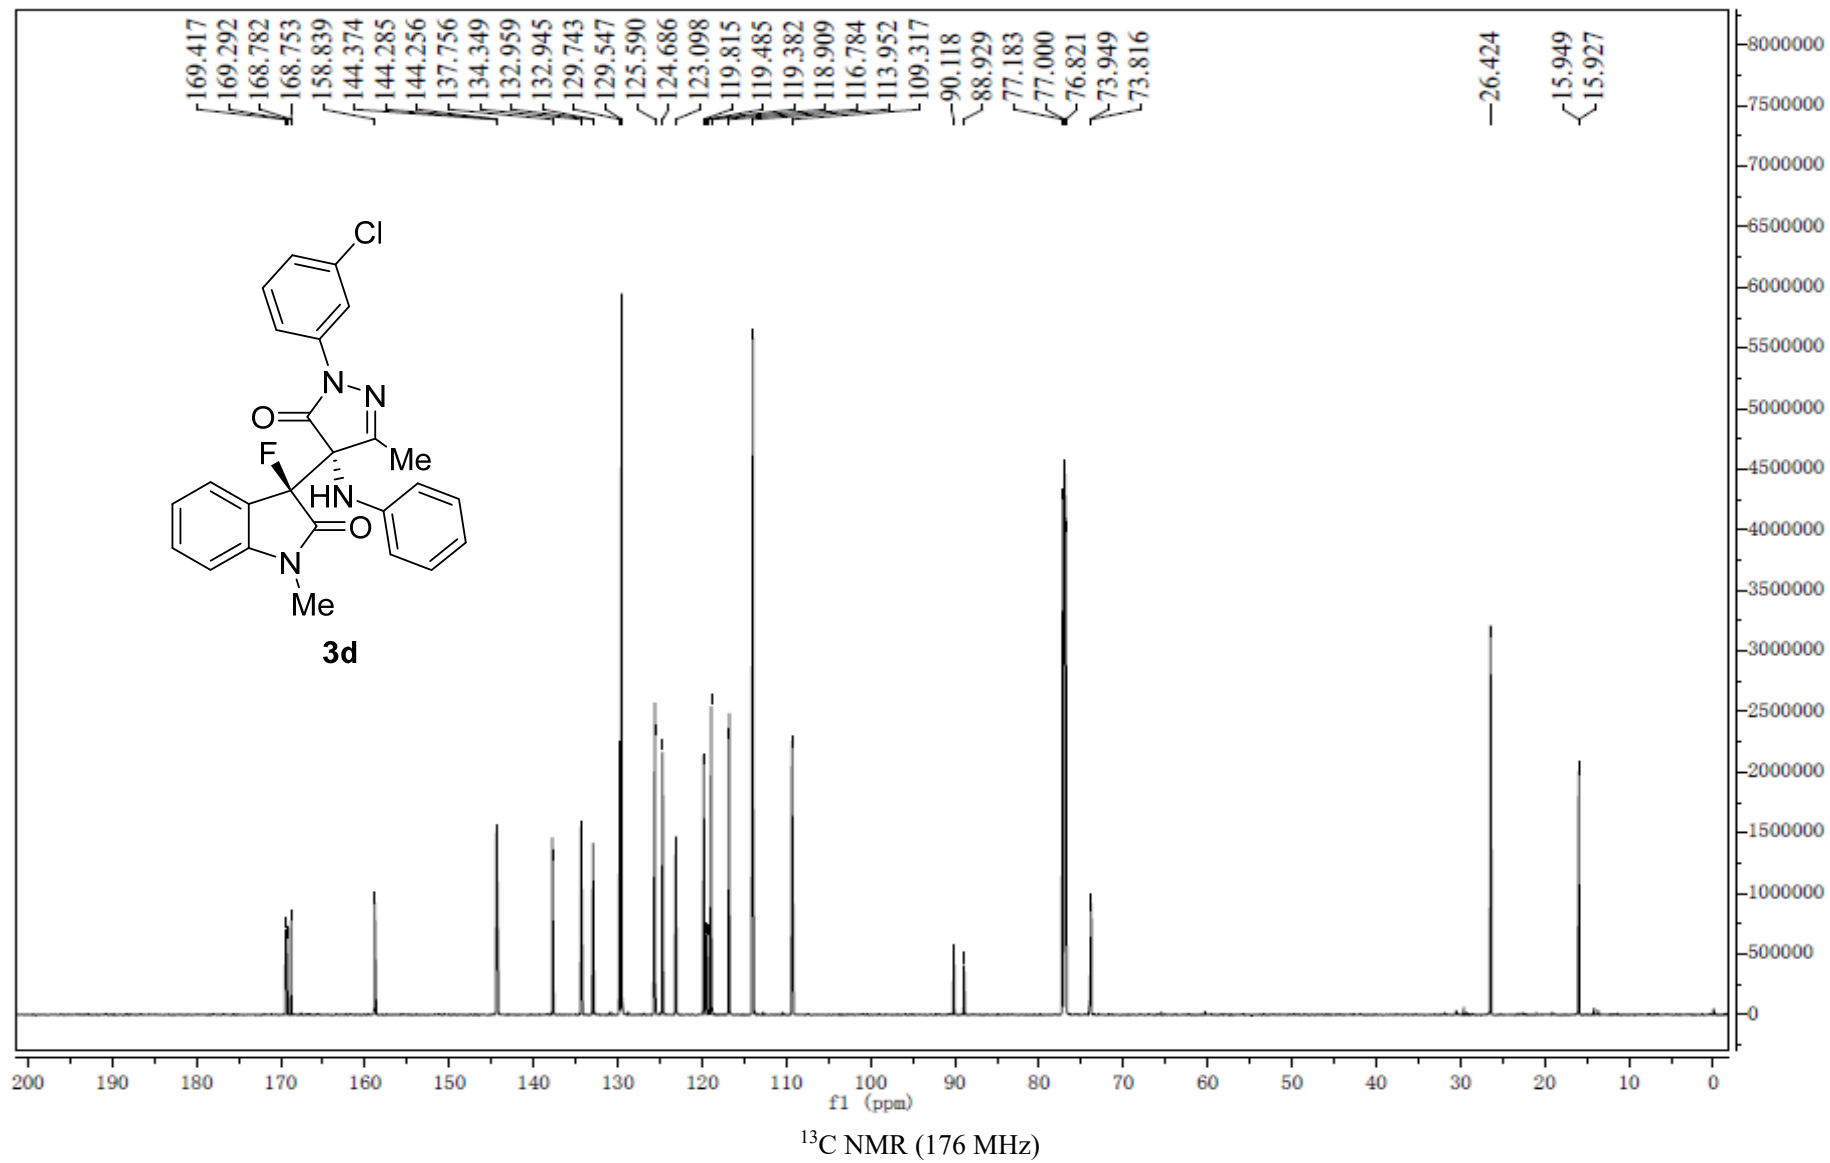

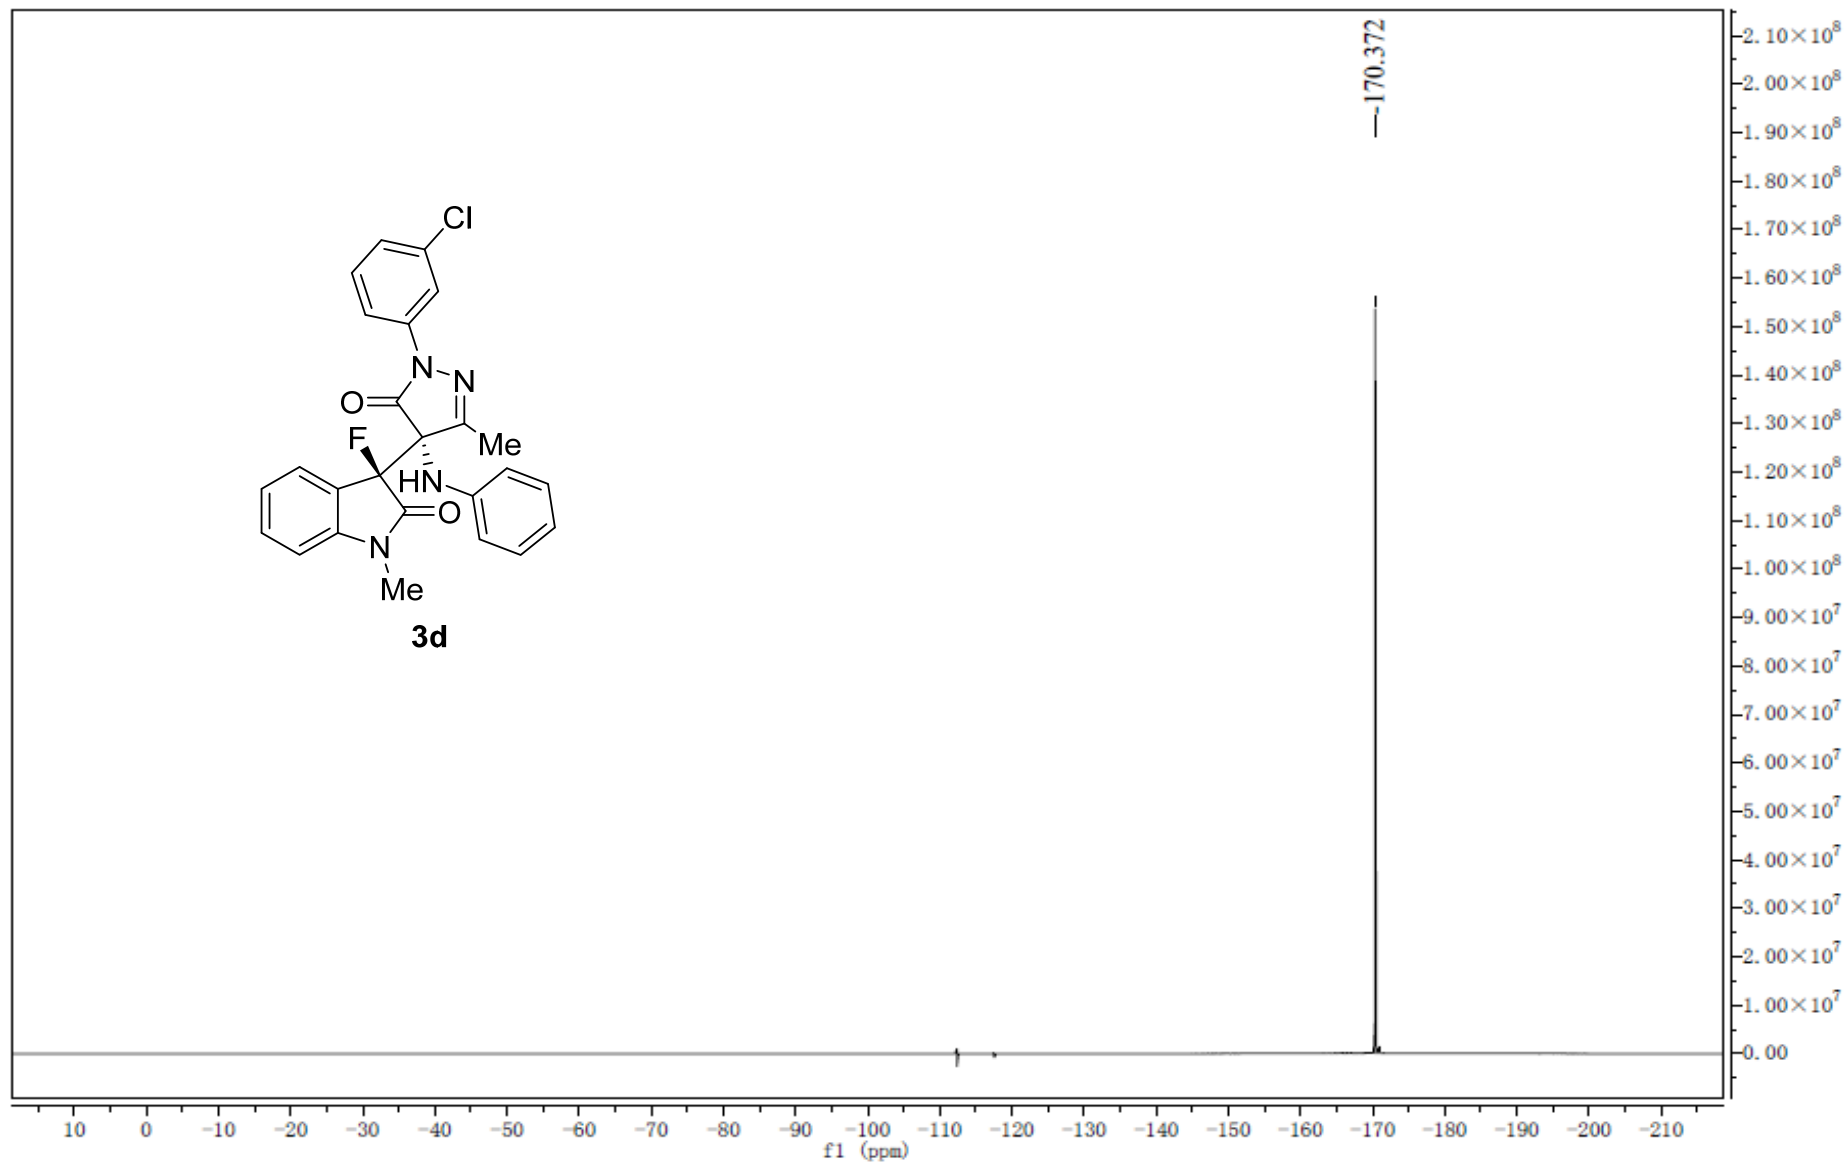

$^{19}\text{F}$  NMR (376 MHz)

S14

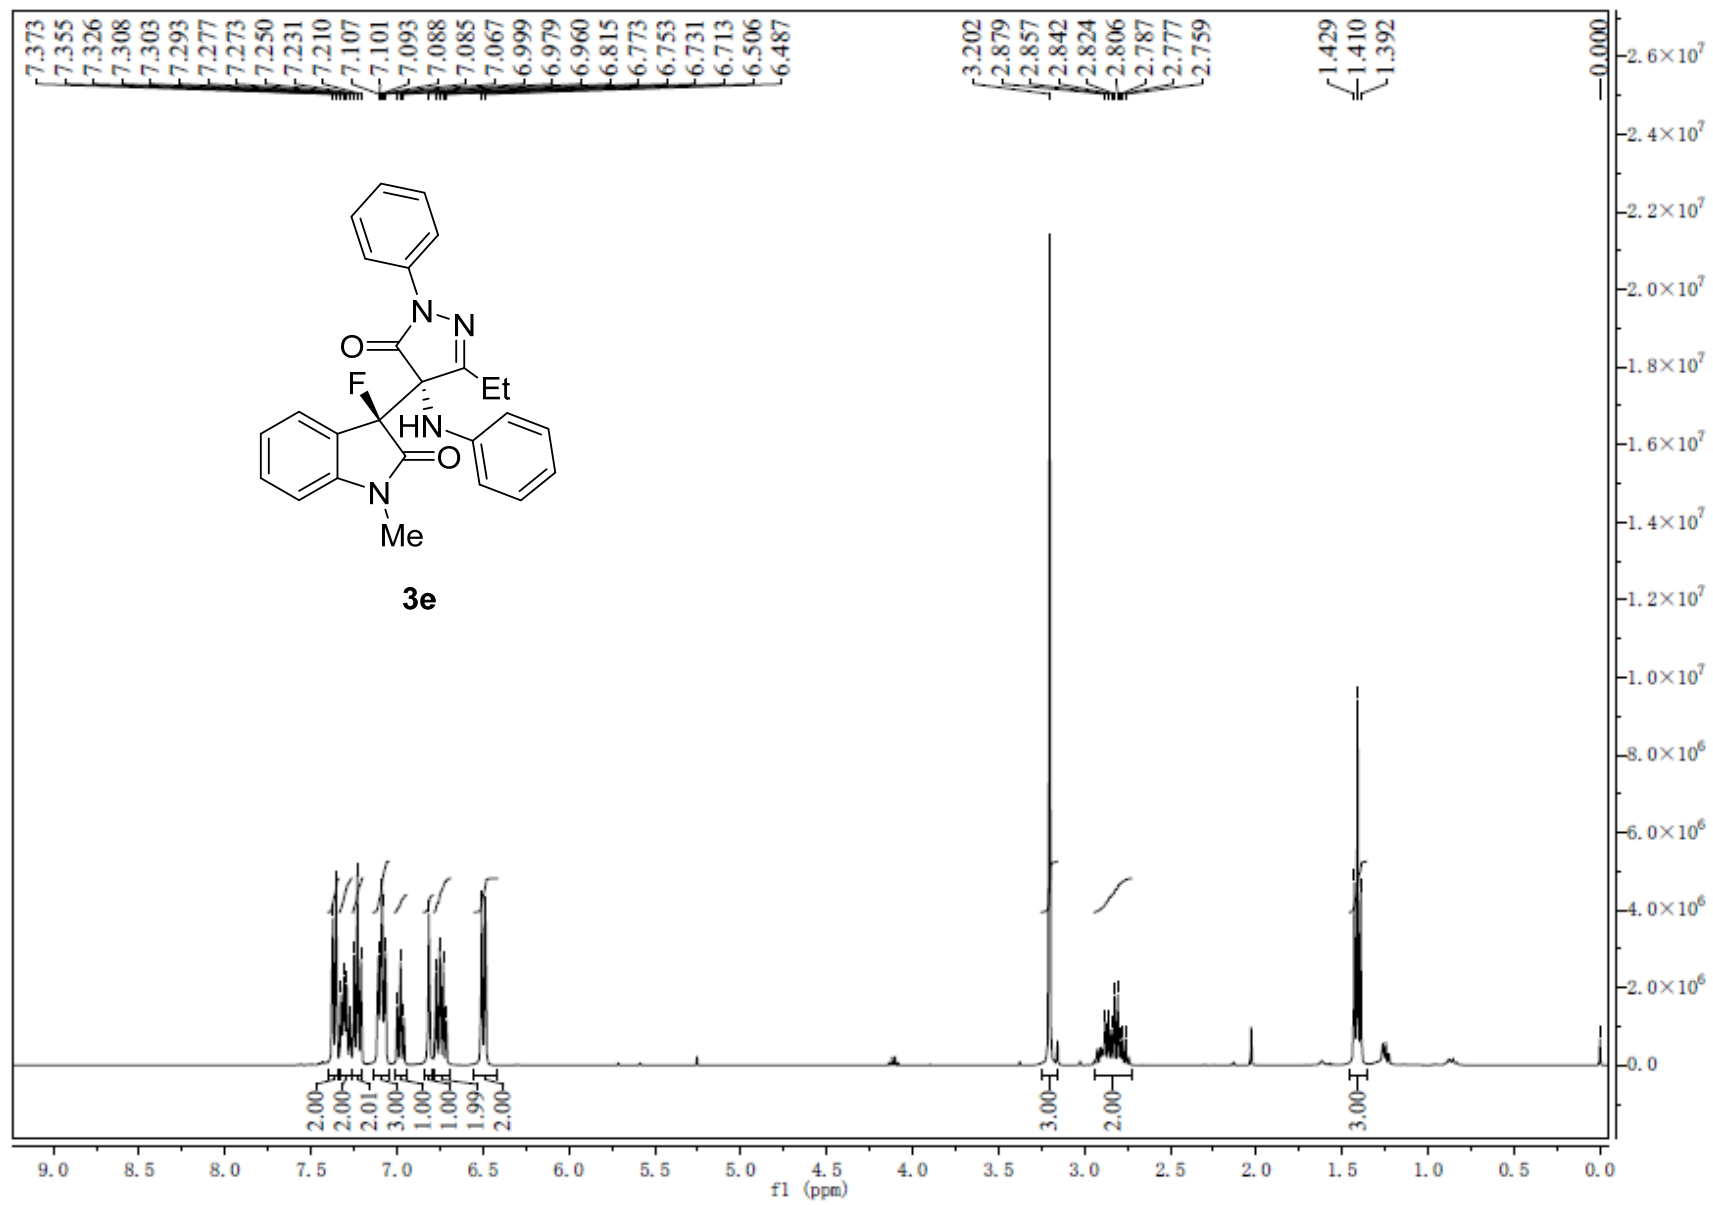

<sup>1</sup>H NMR (400 MHz)



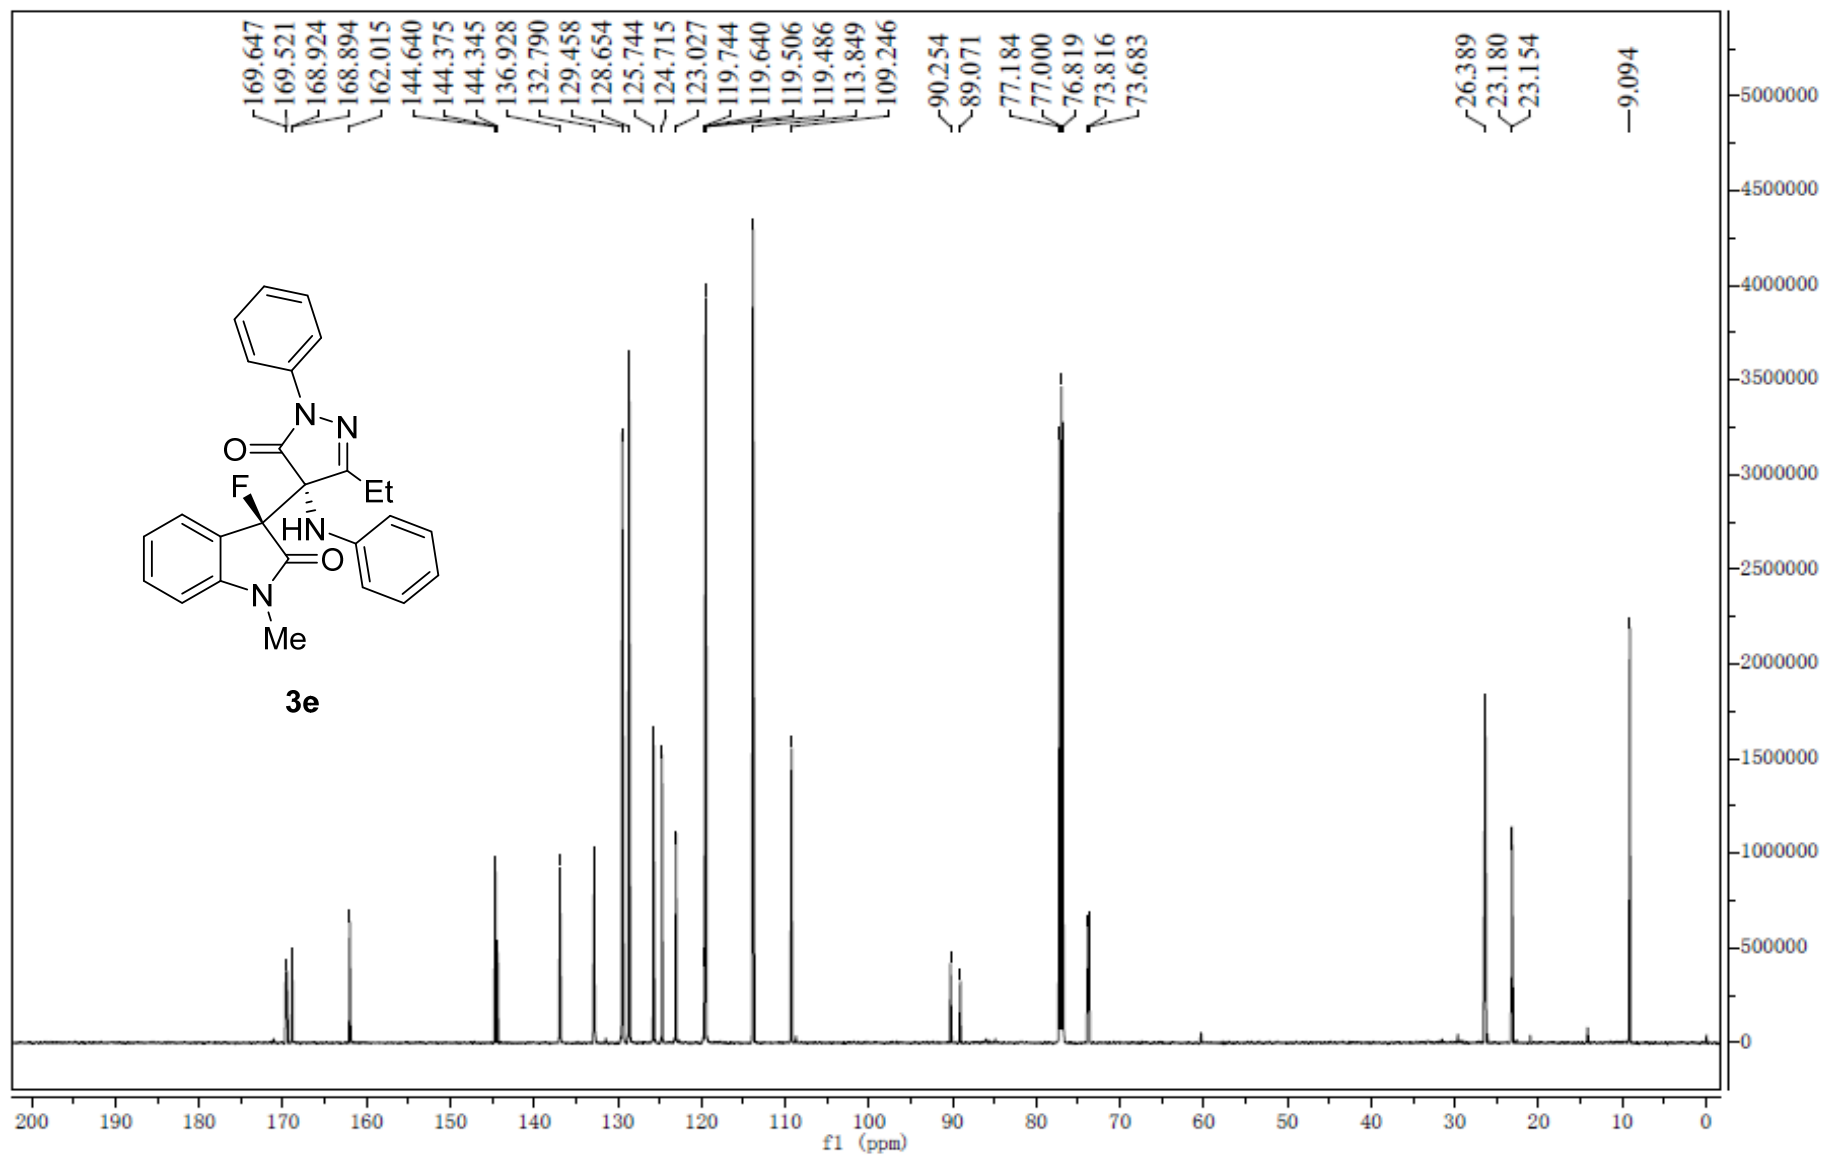

$^{13}\text{C}$  NMR (176 MHz)

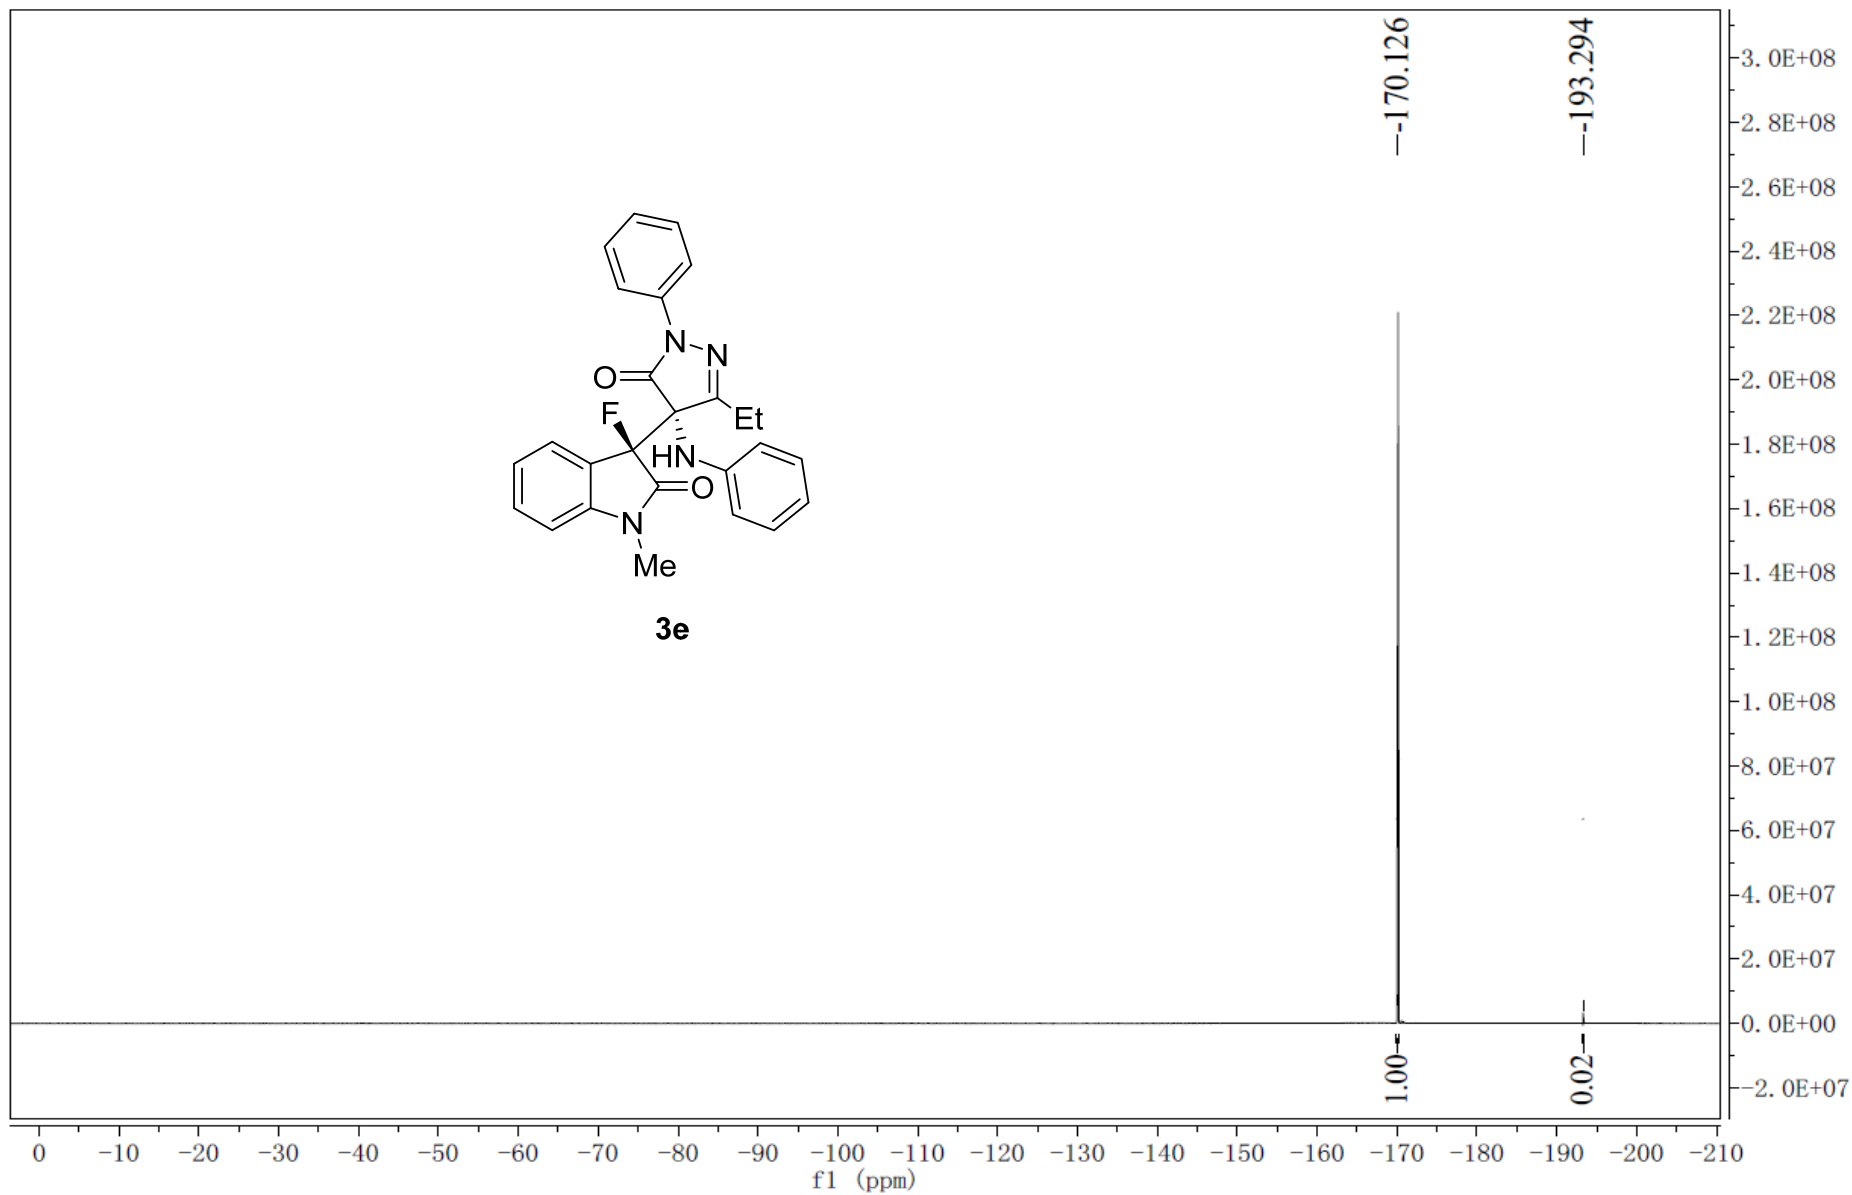

<sup>19</sup>F NMR (376 MHz)

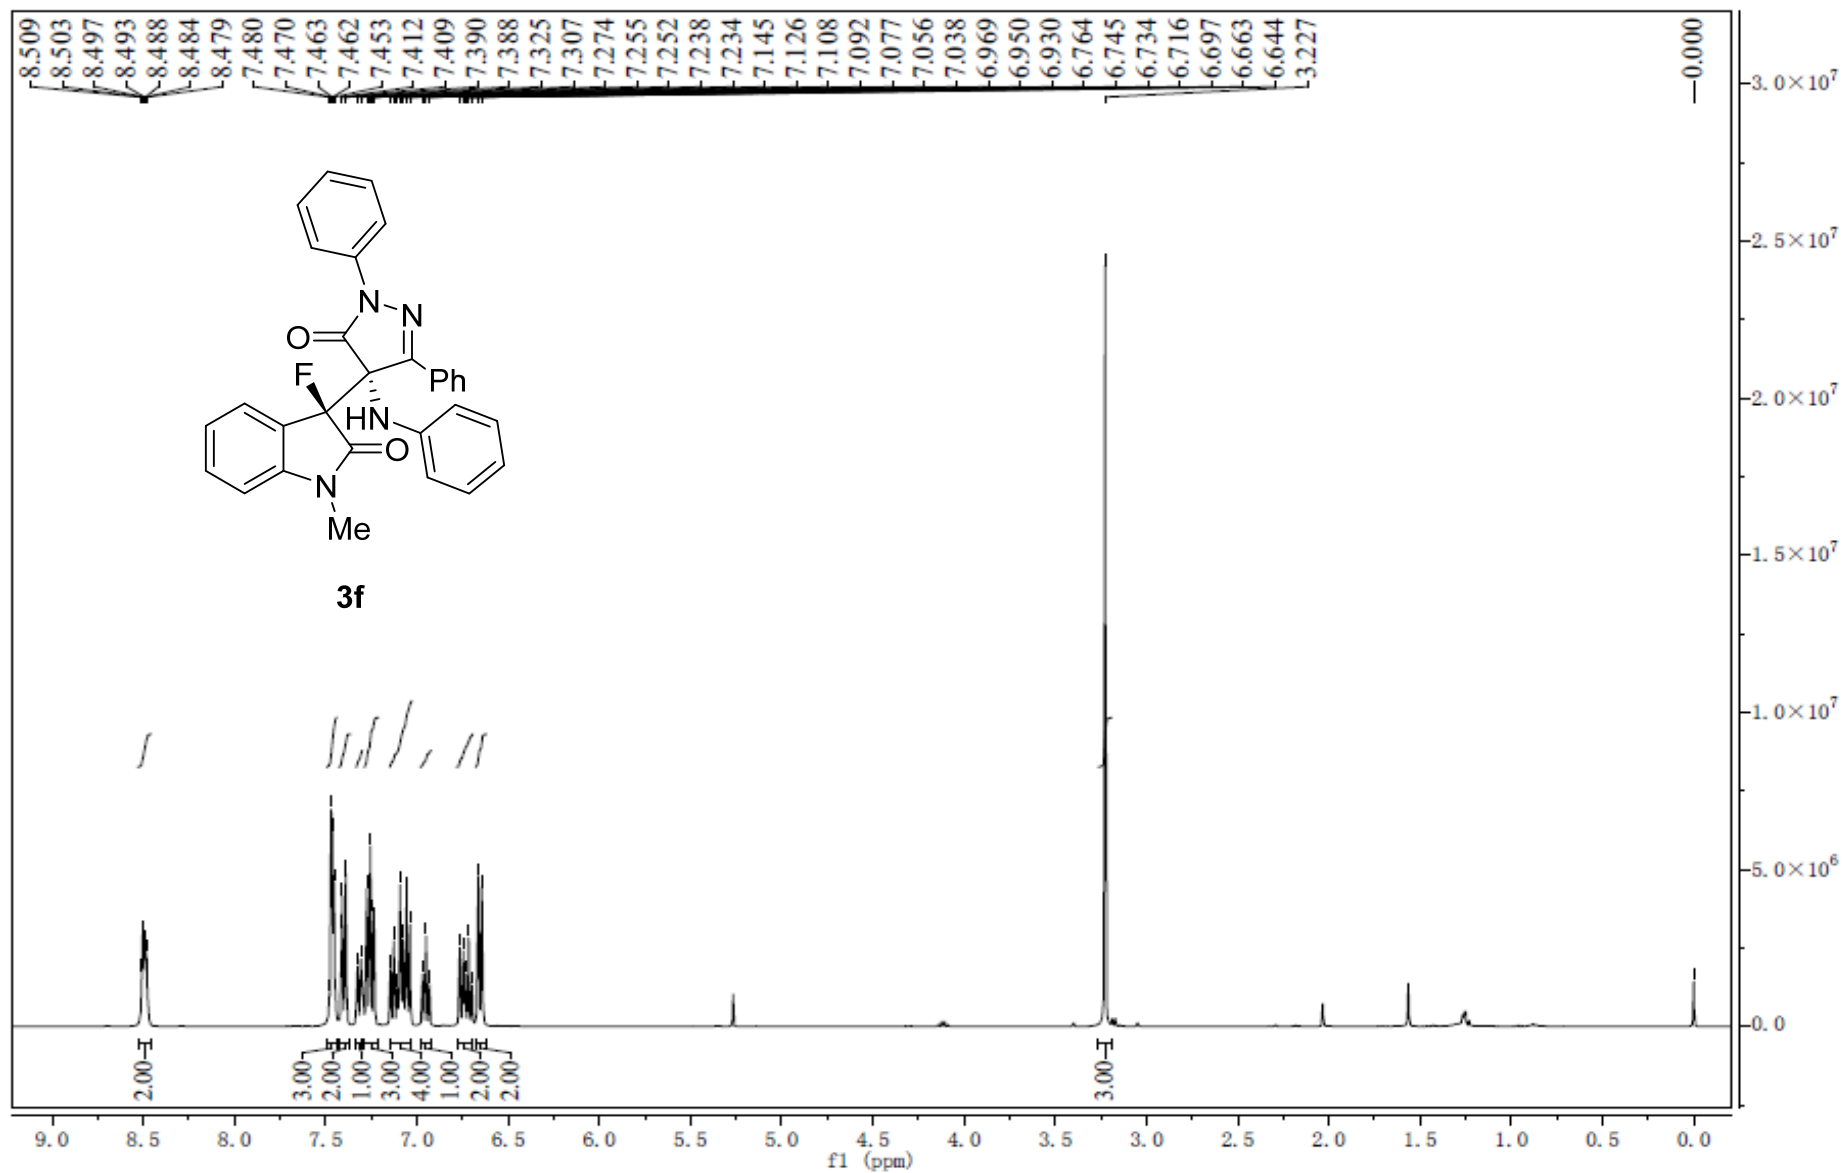

<sup>1</sup>H NMR (400 MHz)

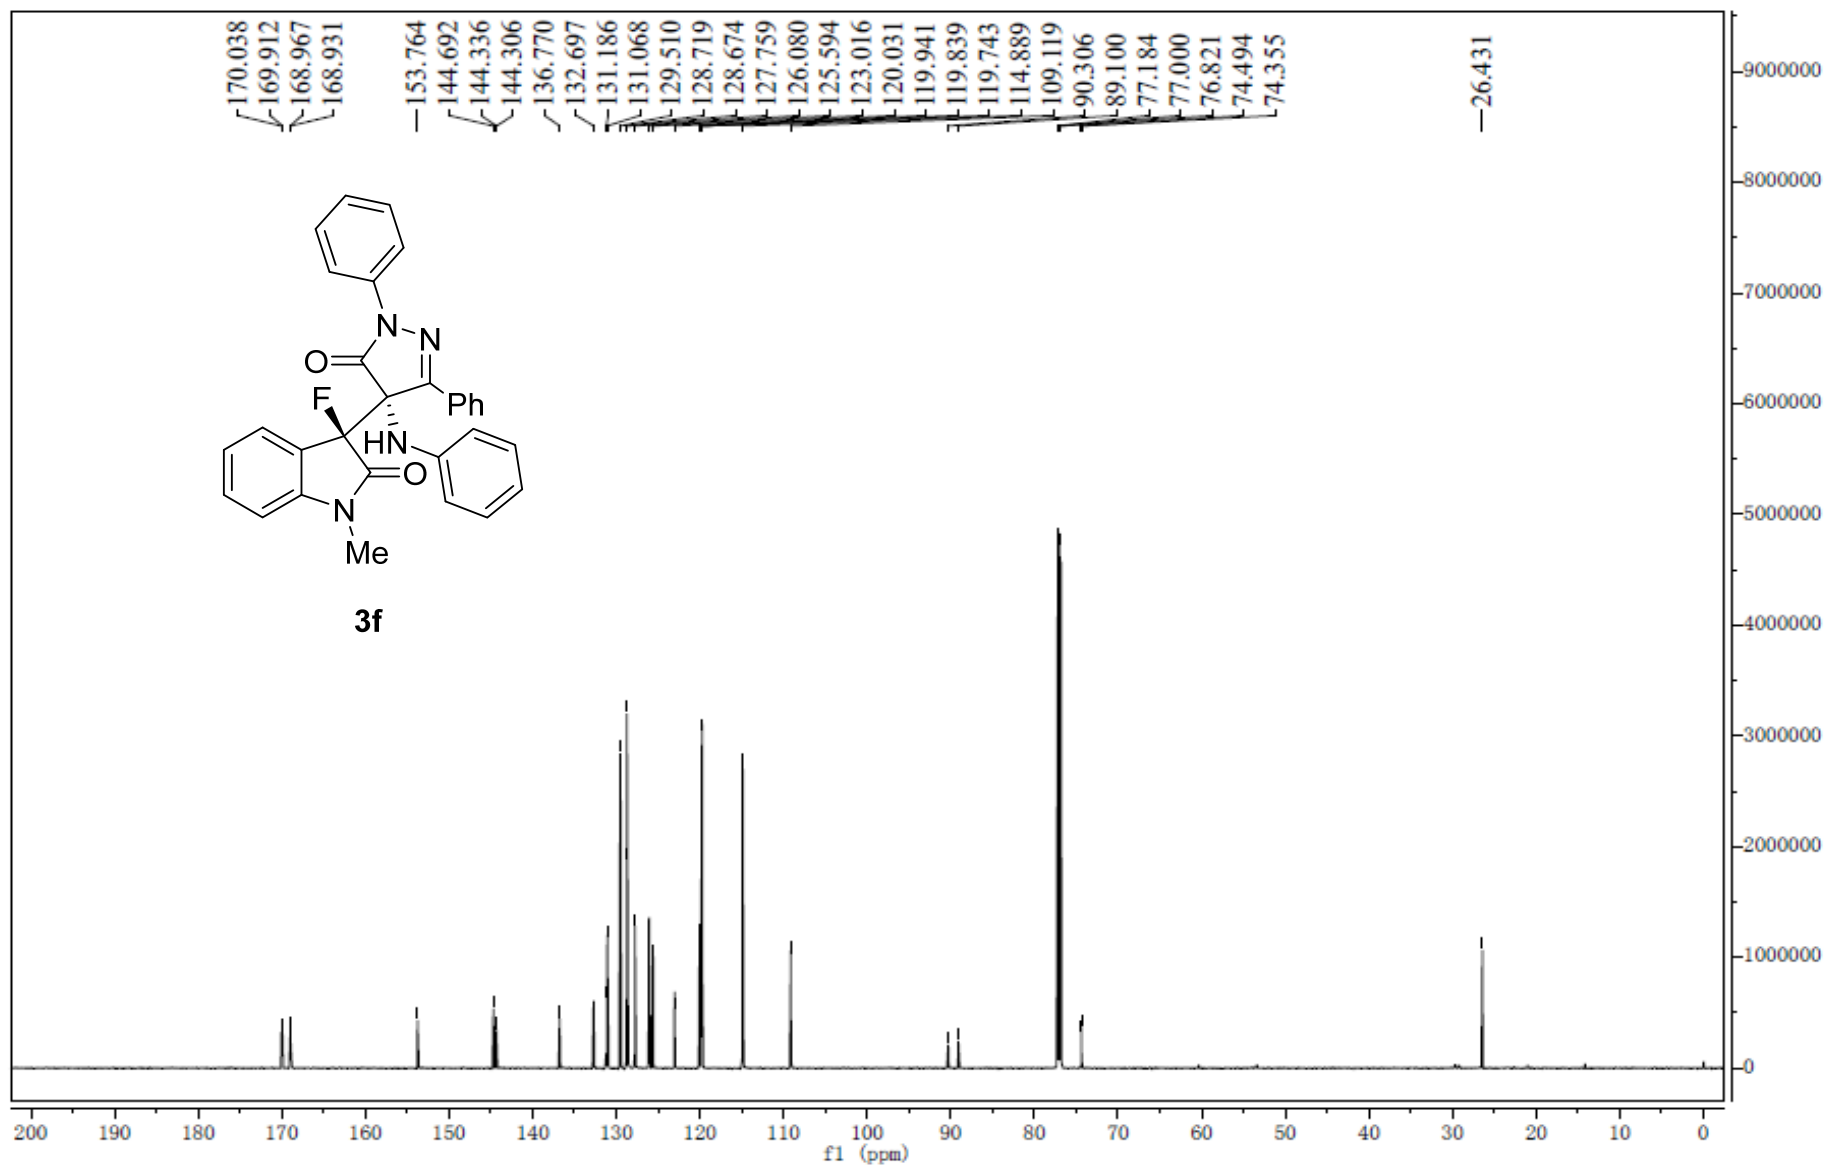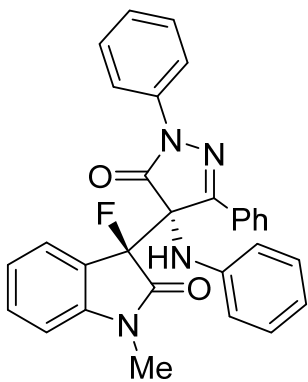

**3f**

<sup>13</sup>C NMR (176 MHz)

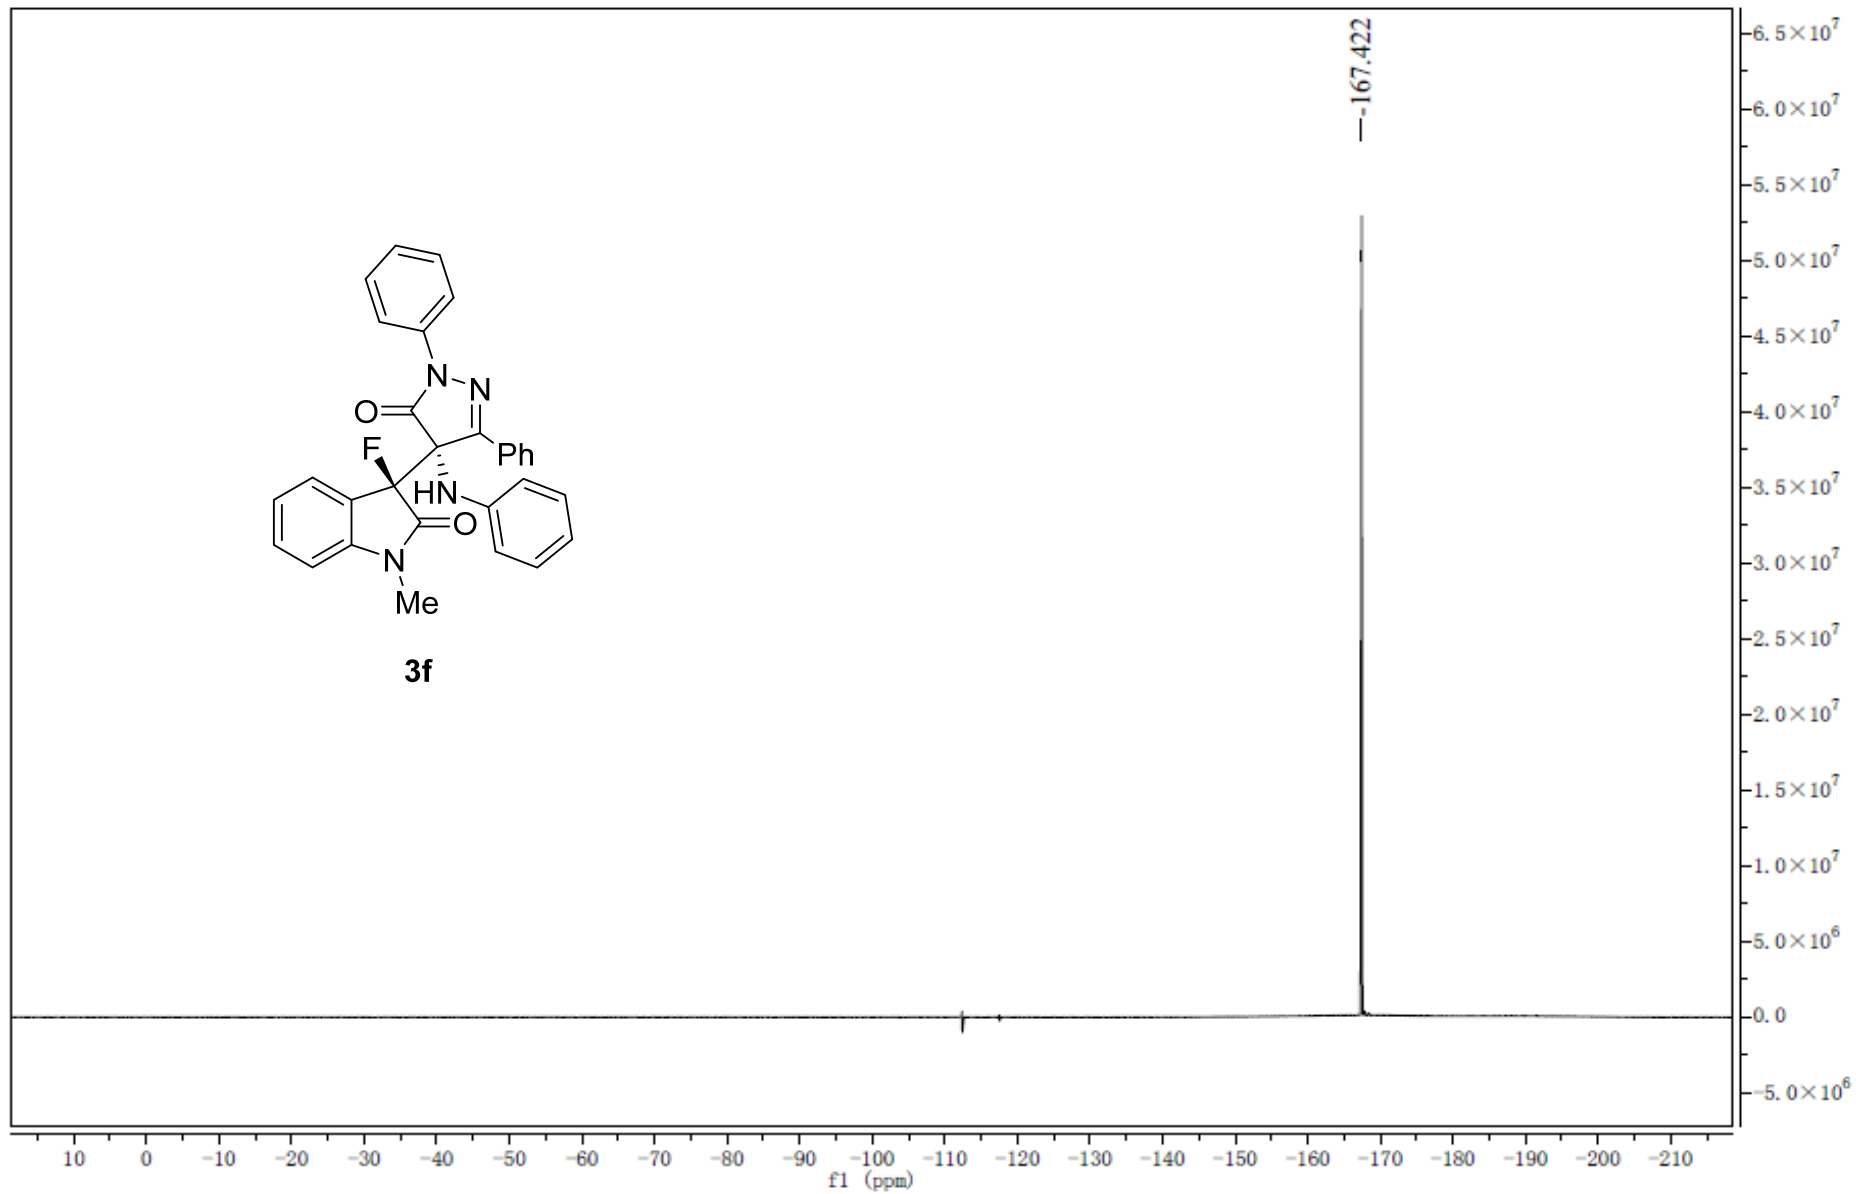

$^{19}\text{F}$  NMR (376 MHz)

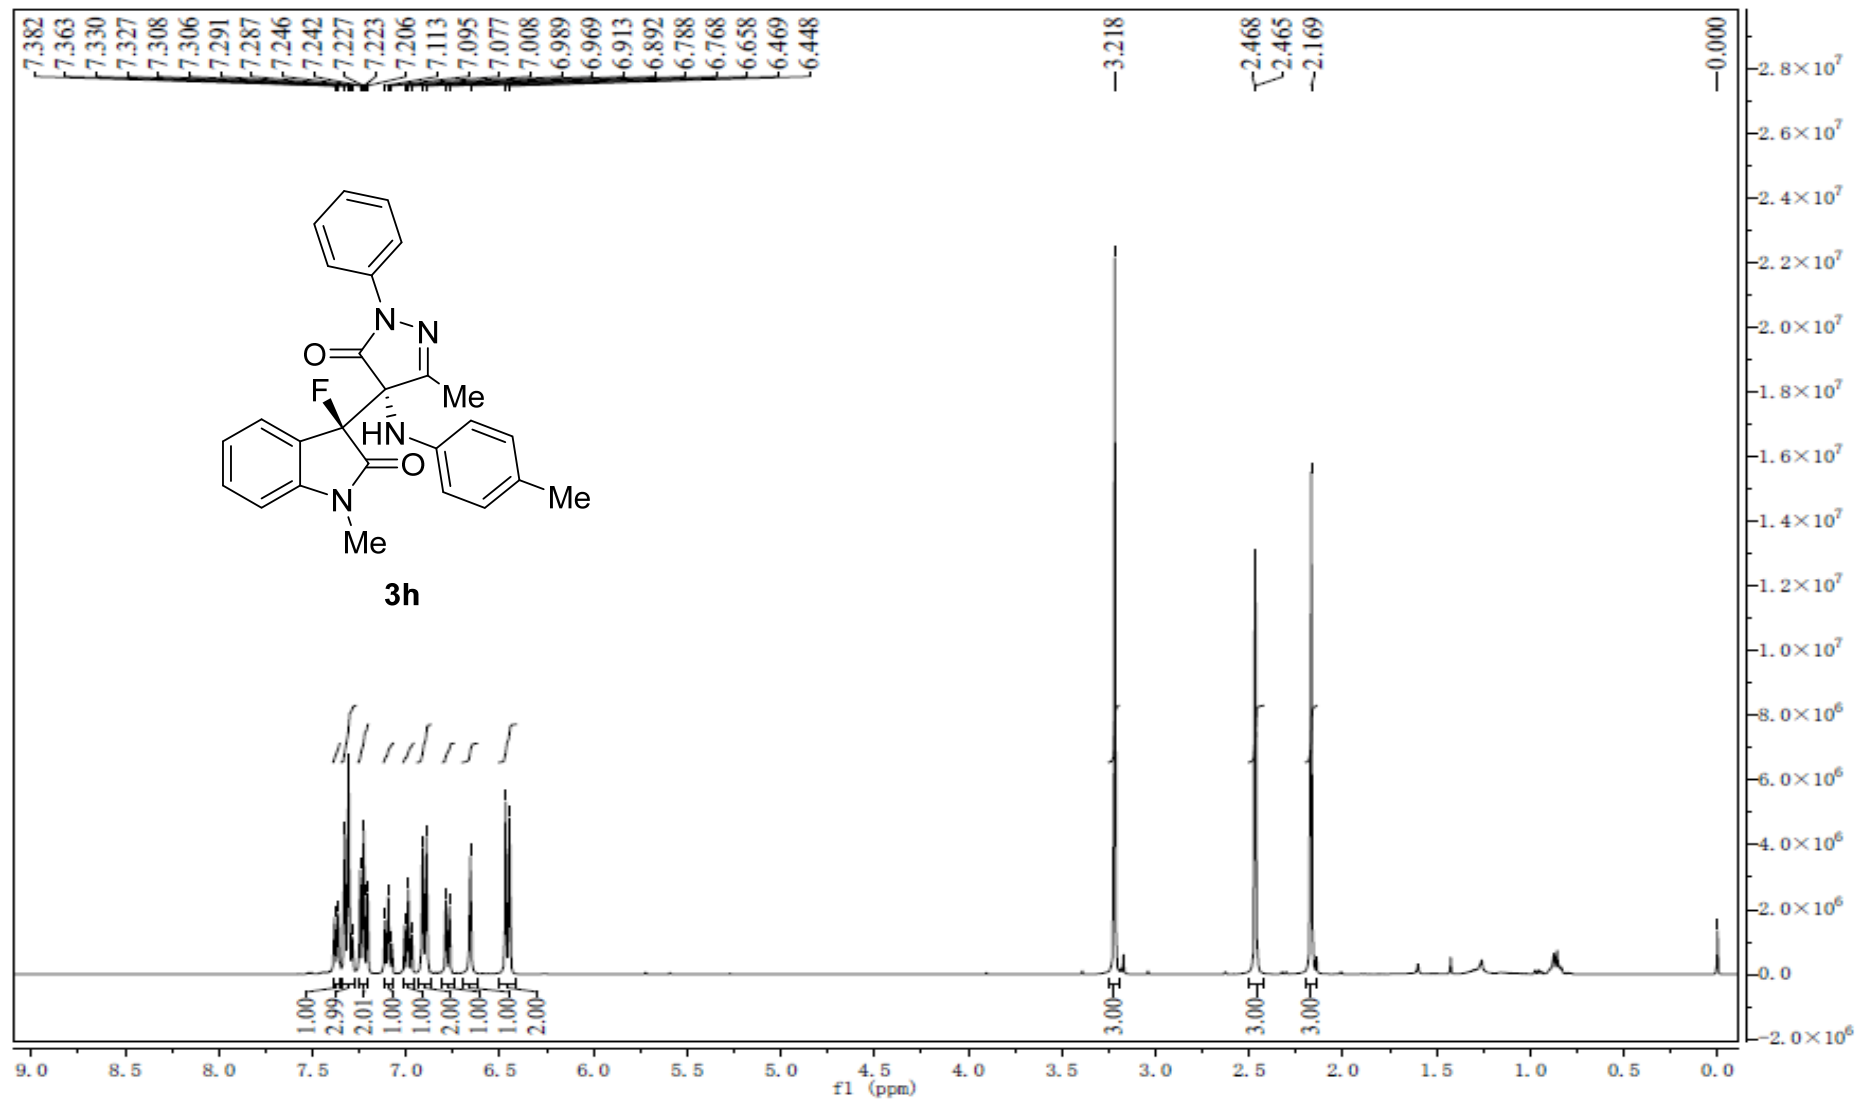

$^1\text{H NMR}$  (400 MHz)

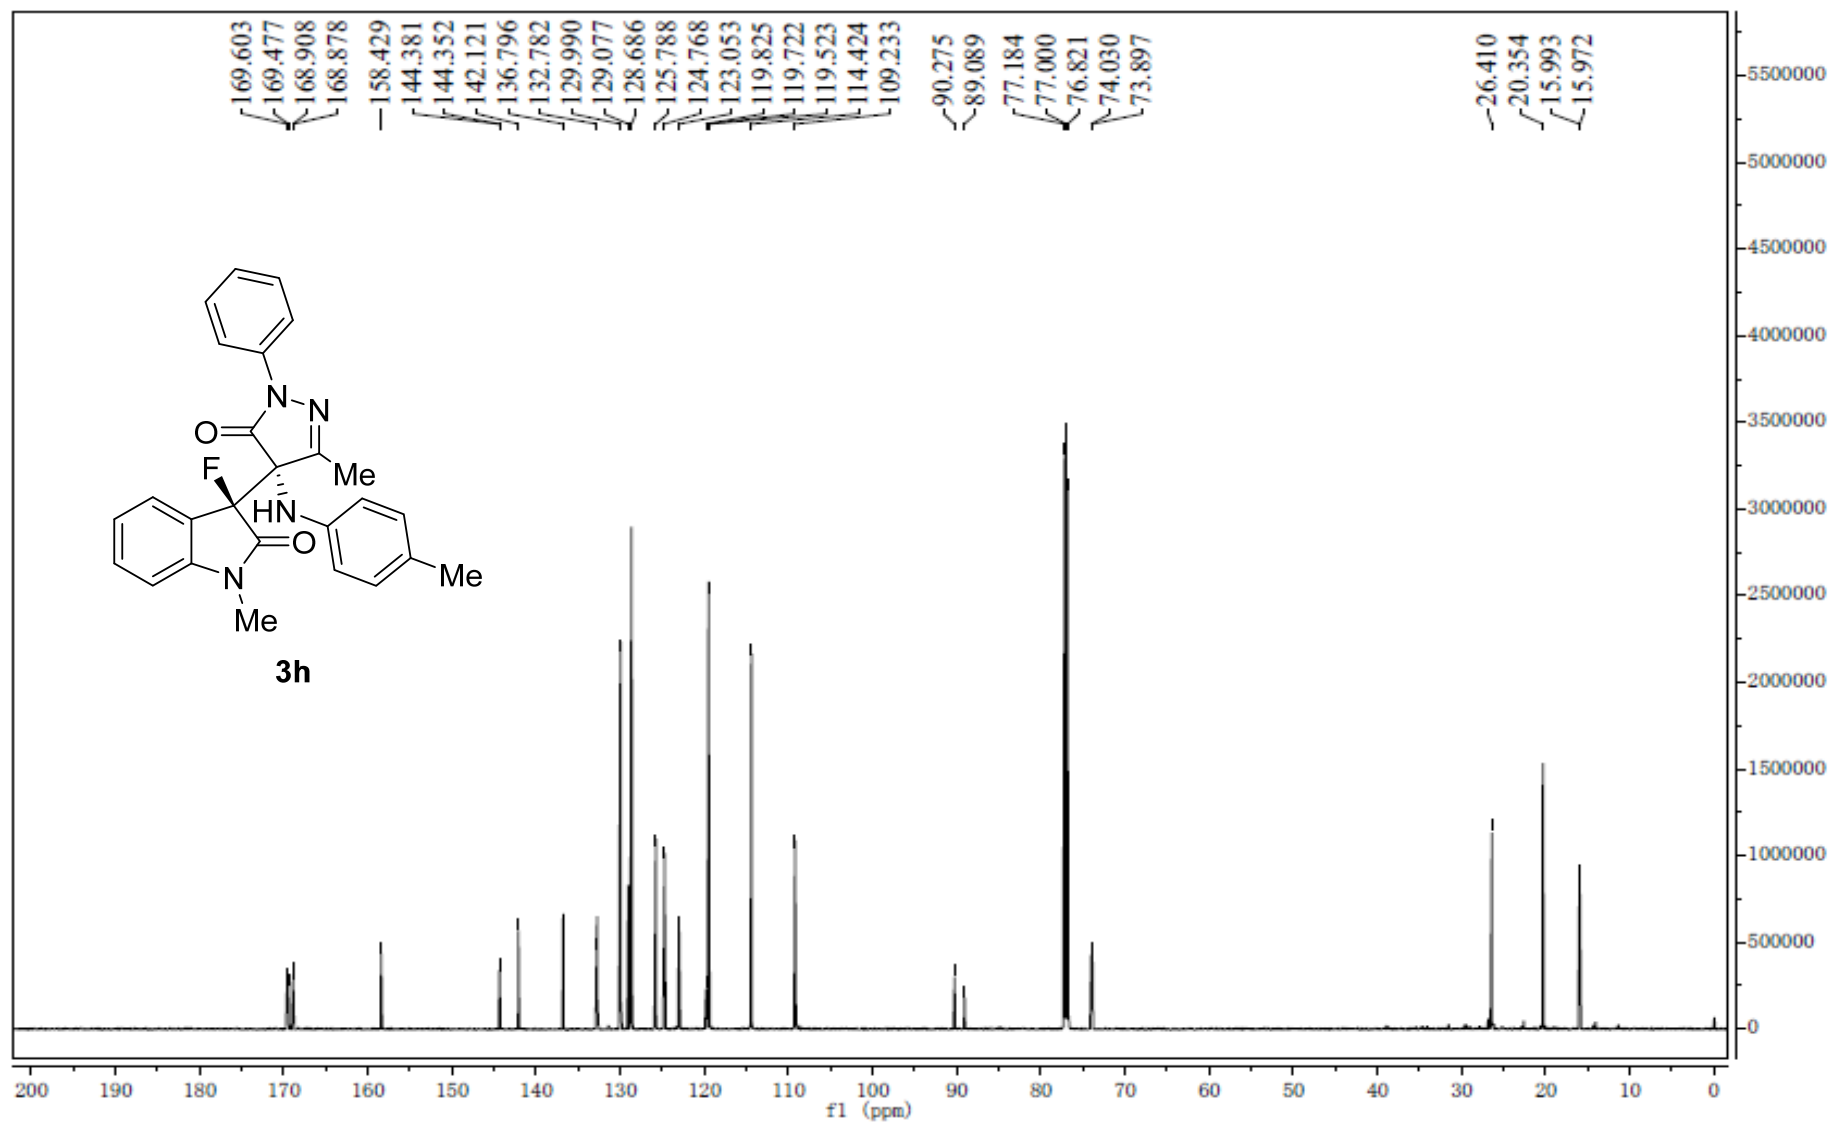

<sup>13</sup>C NMR (176 MHz)

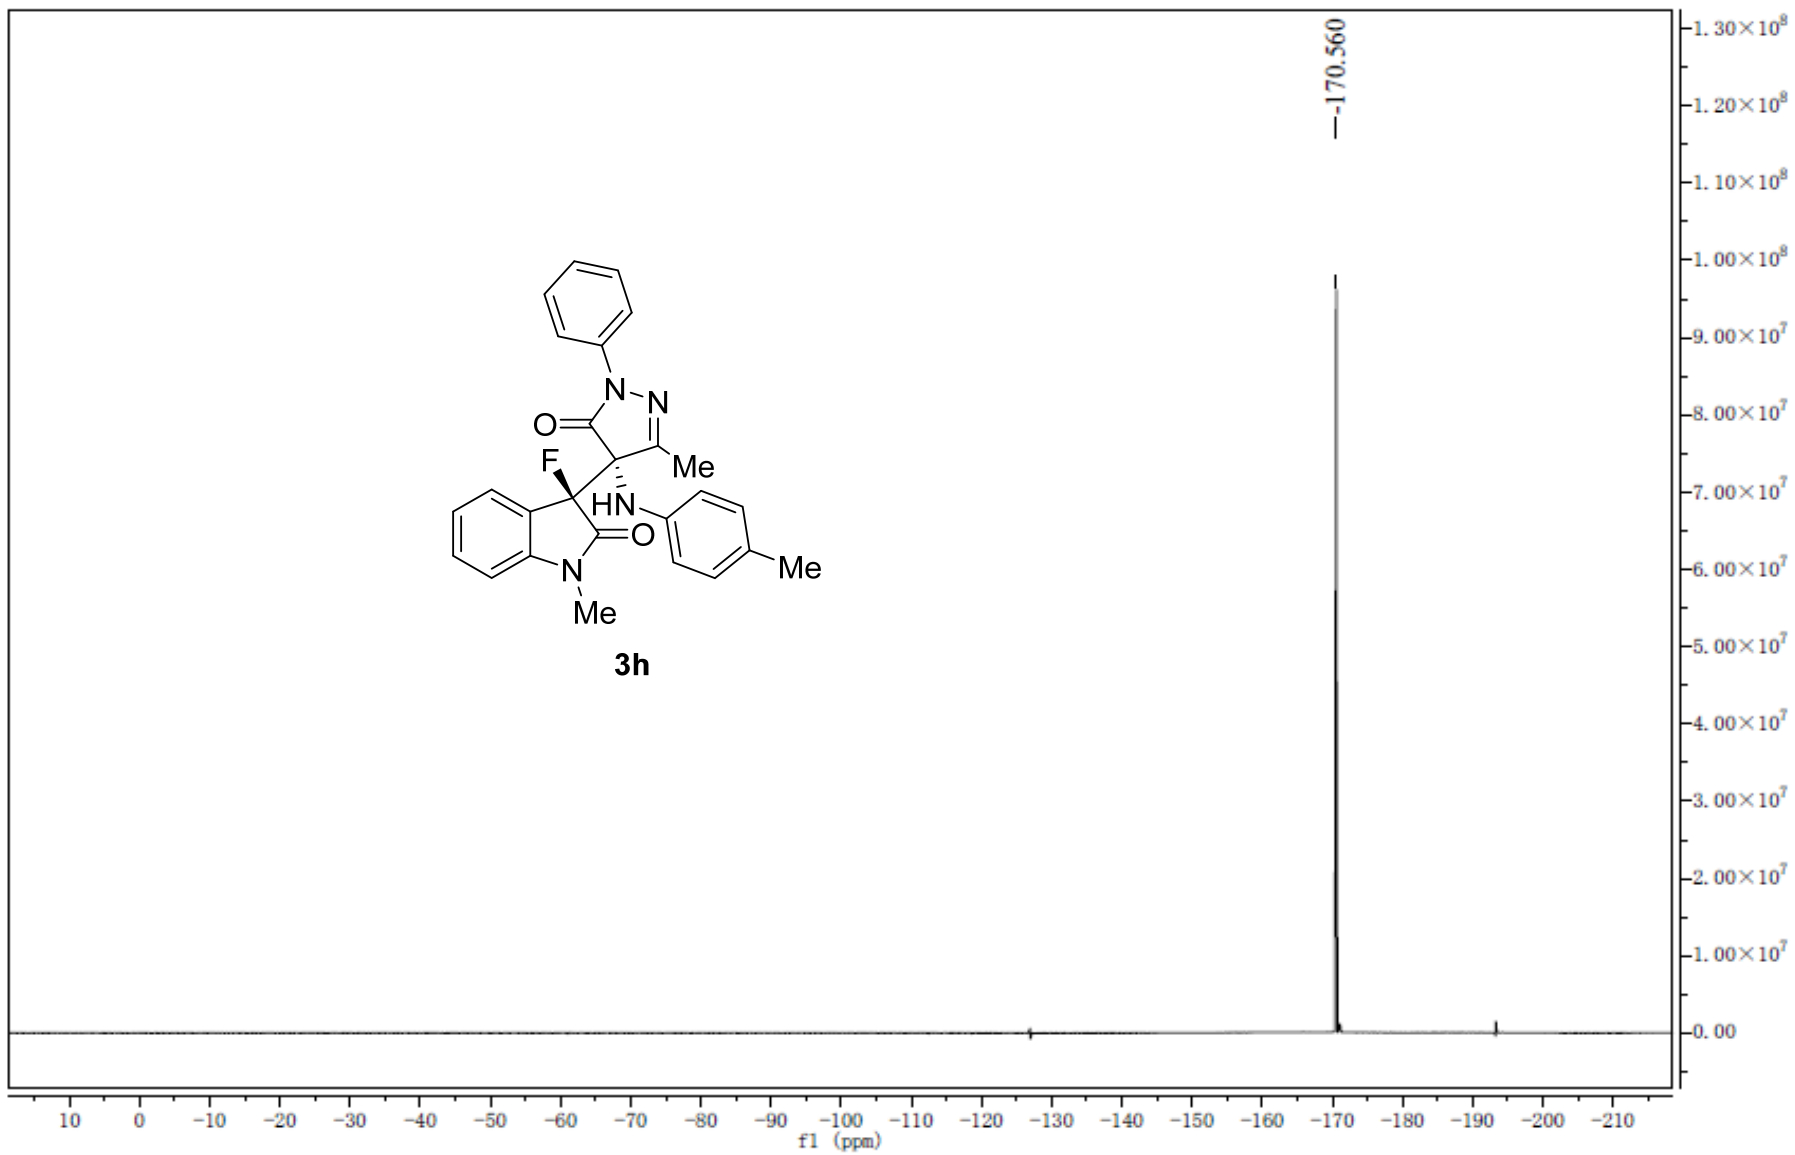

$^{19}\text{F}$  NMR (376 MHz)



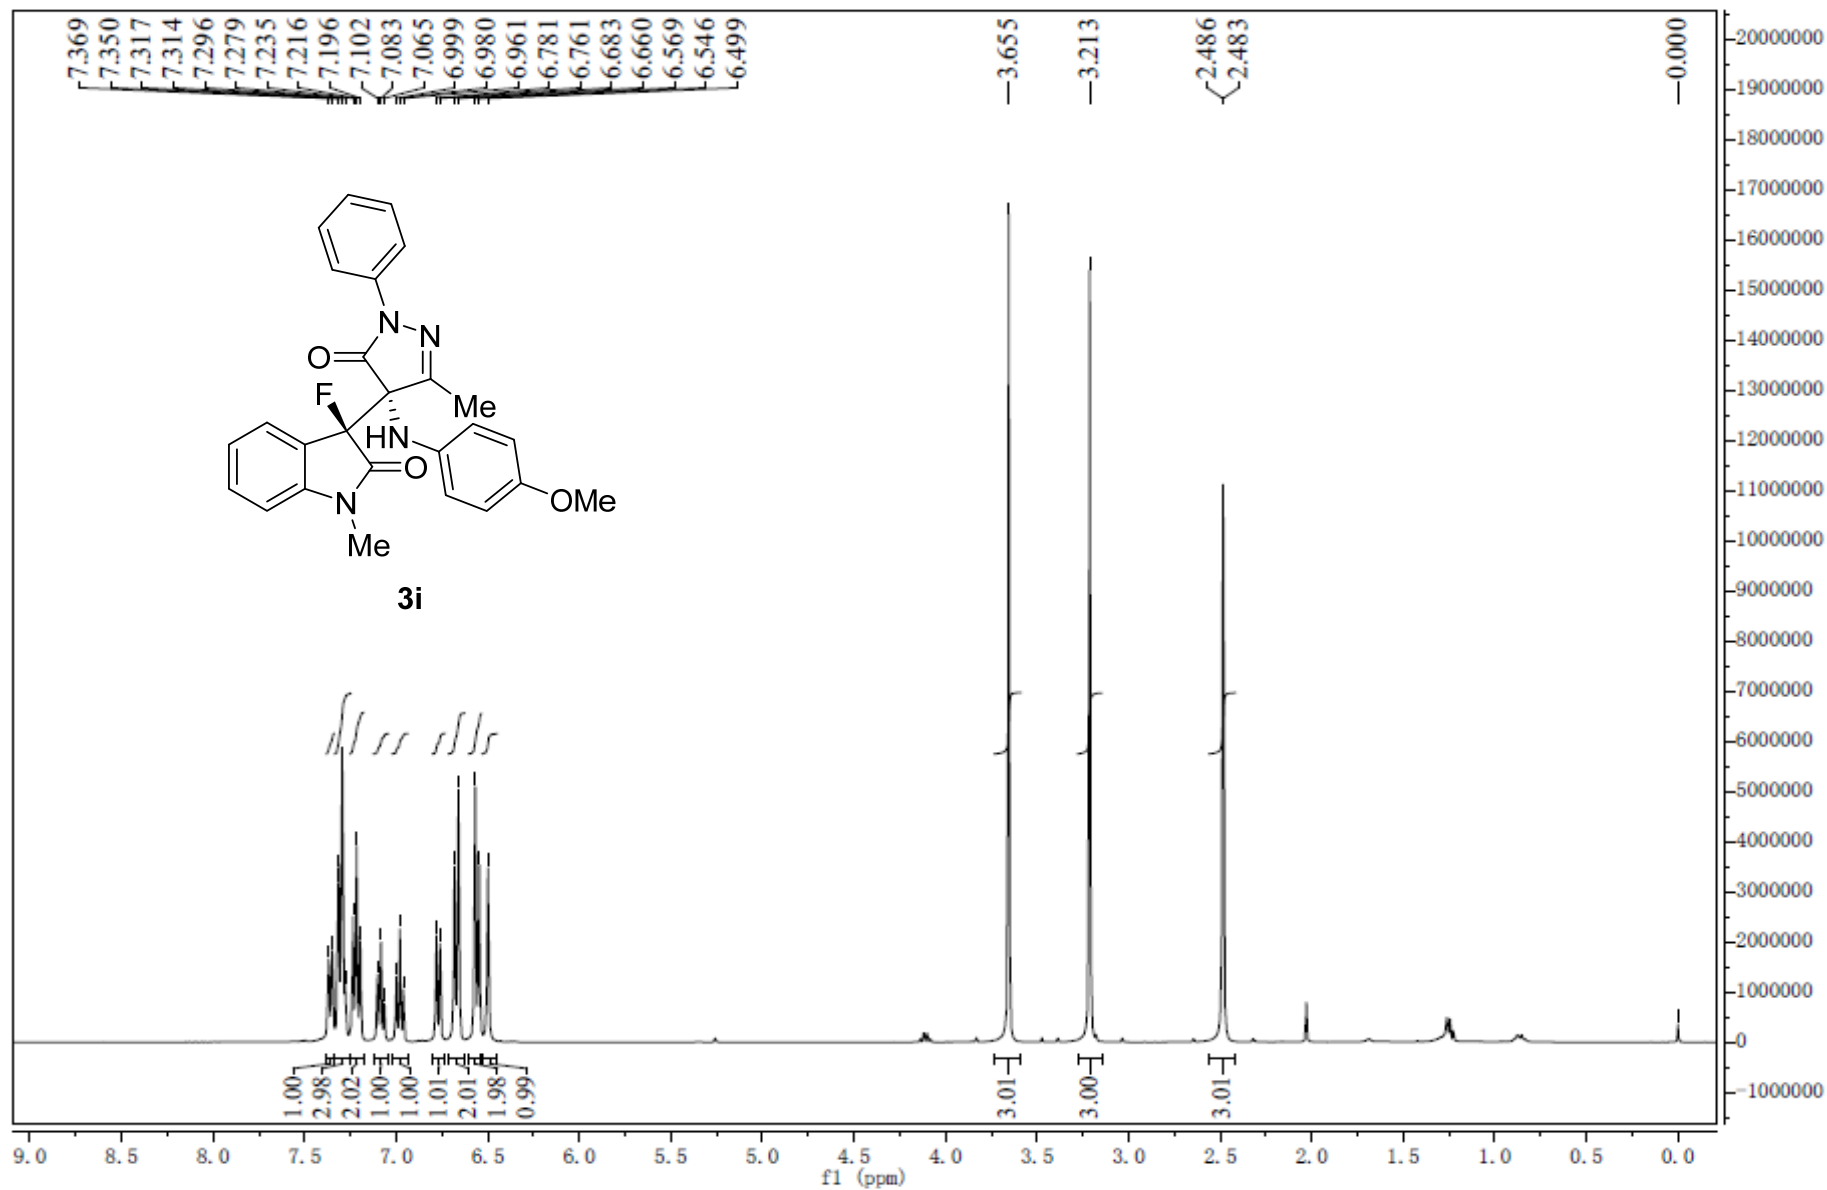

$^1\text{H NMR}$  (400 MHz)

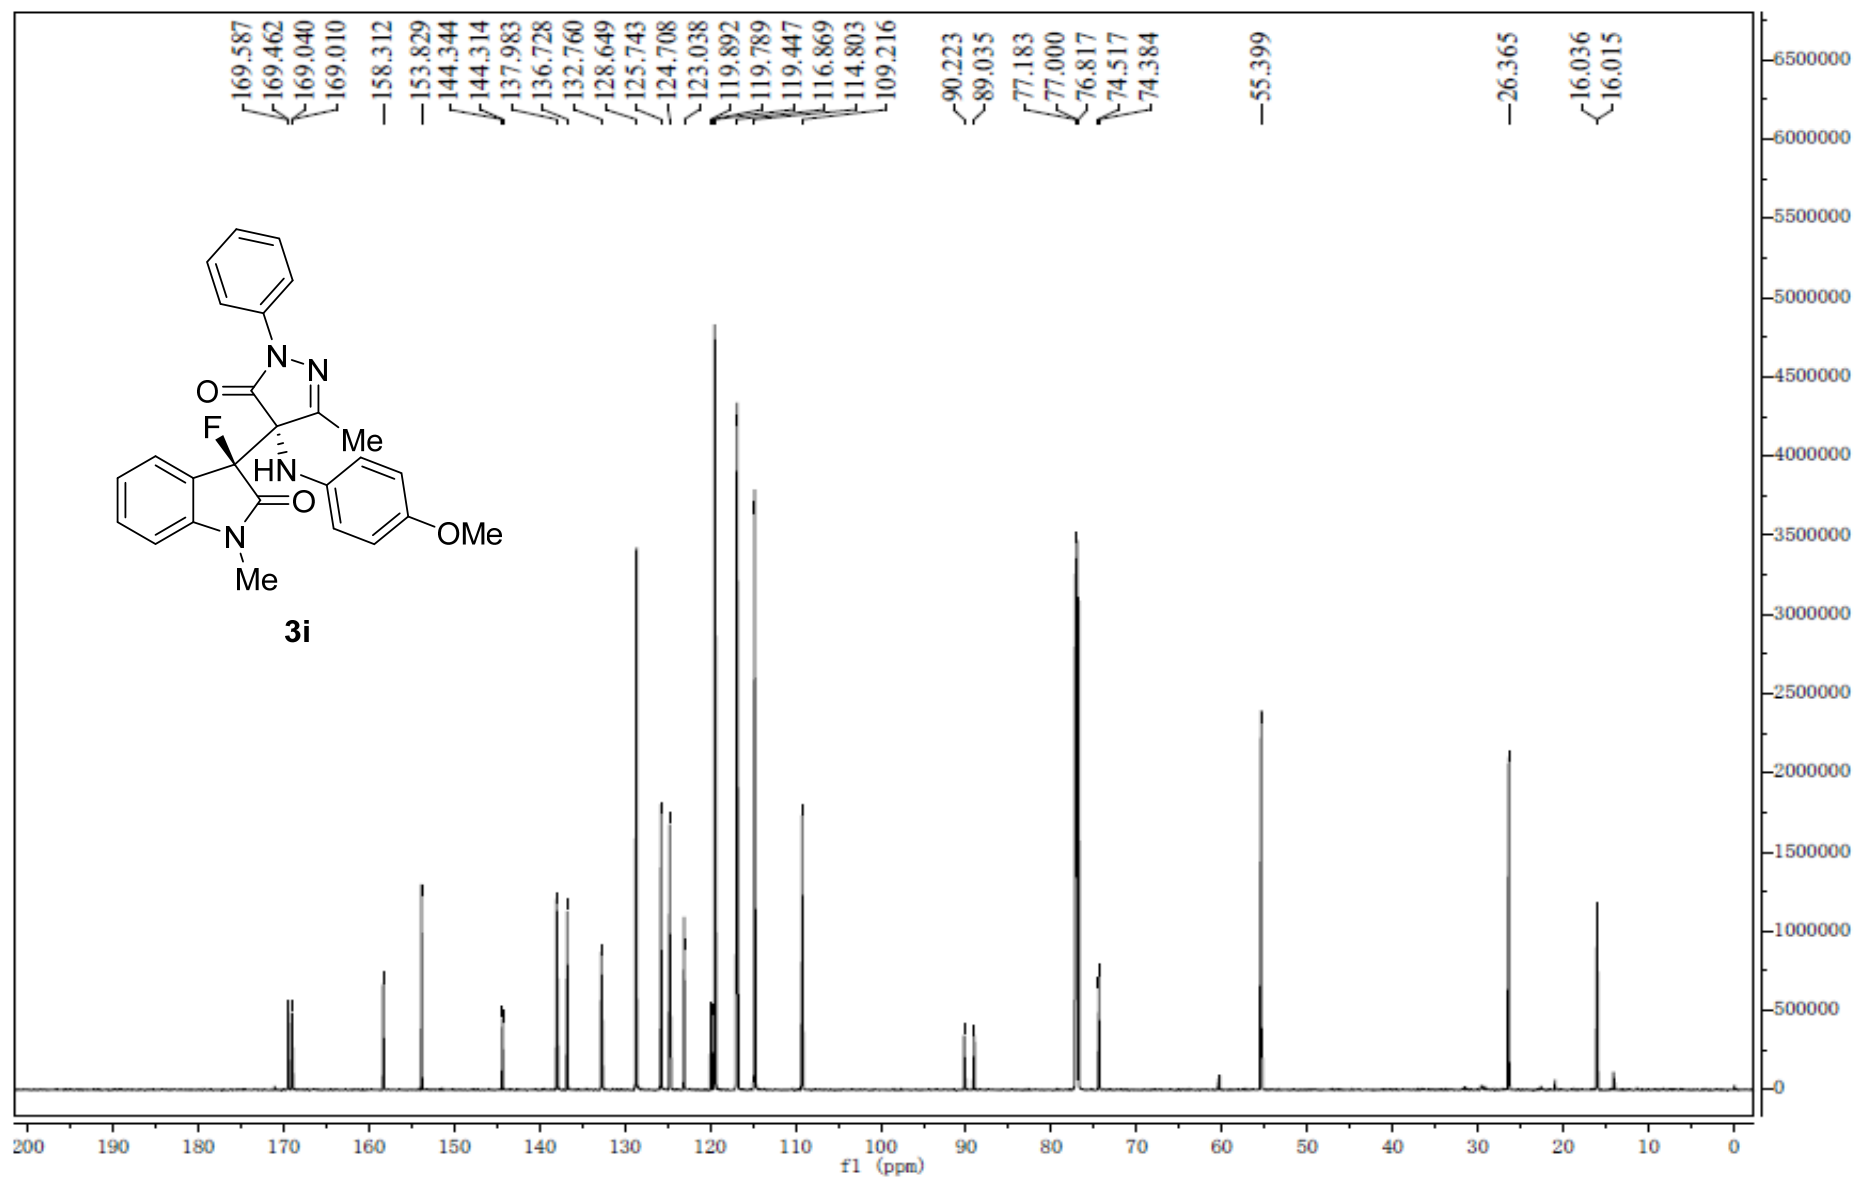

$^{13}\text{C}$  NMR (176 MHz)

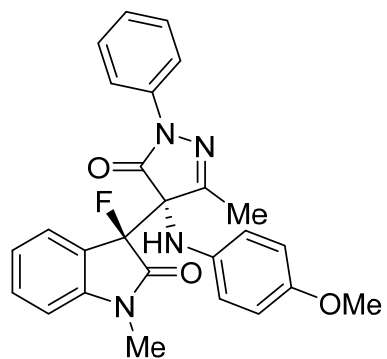

3i

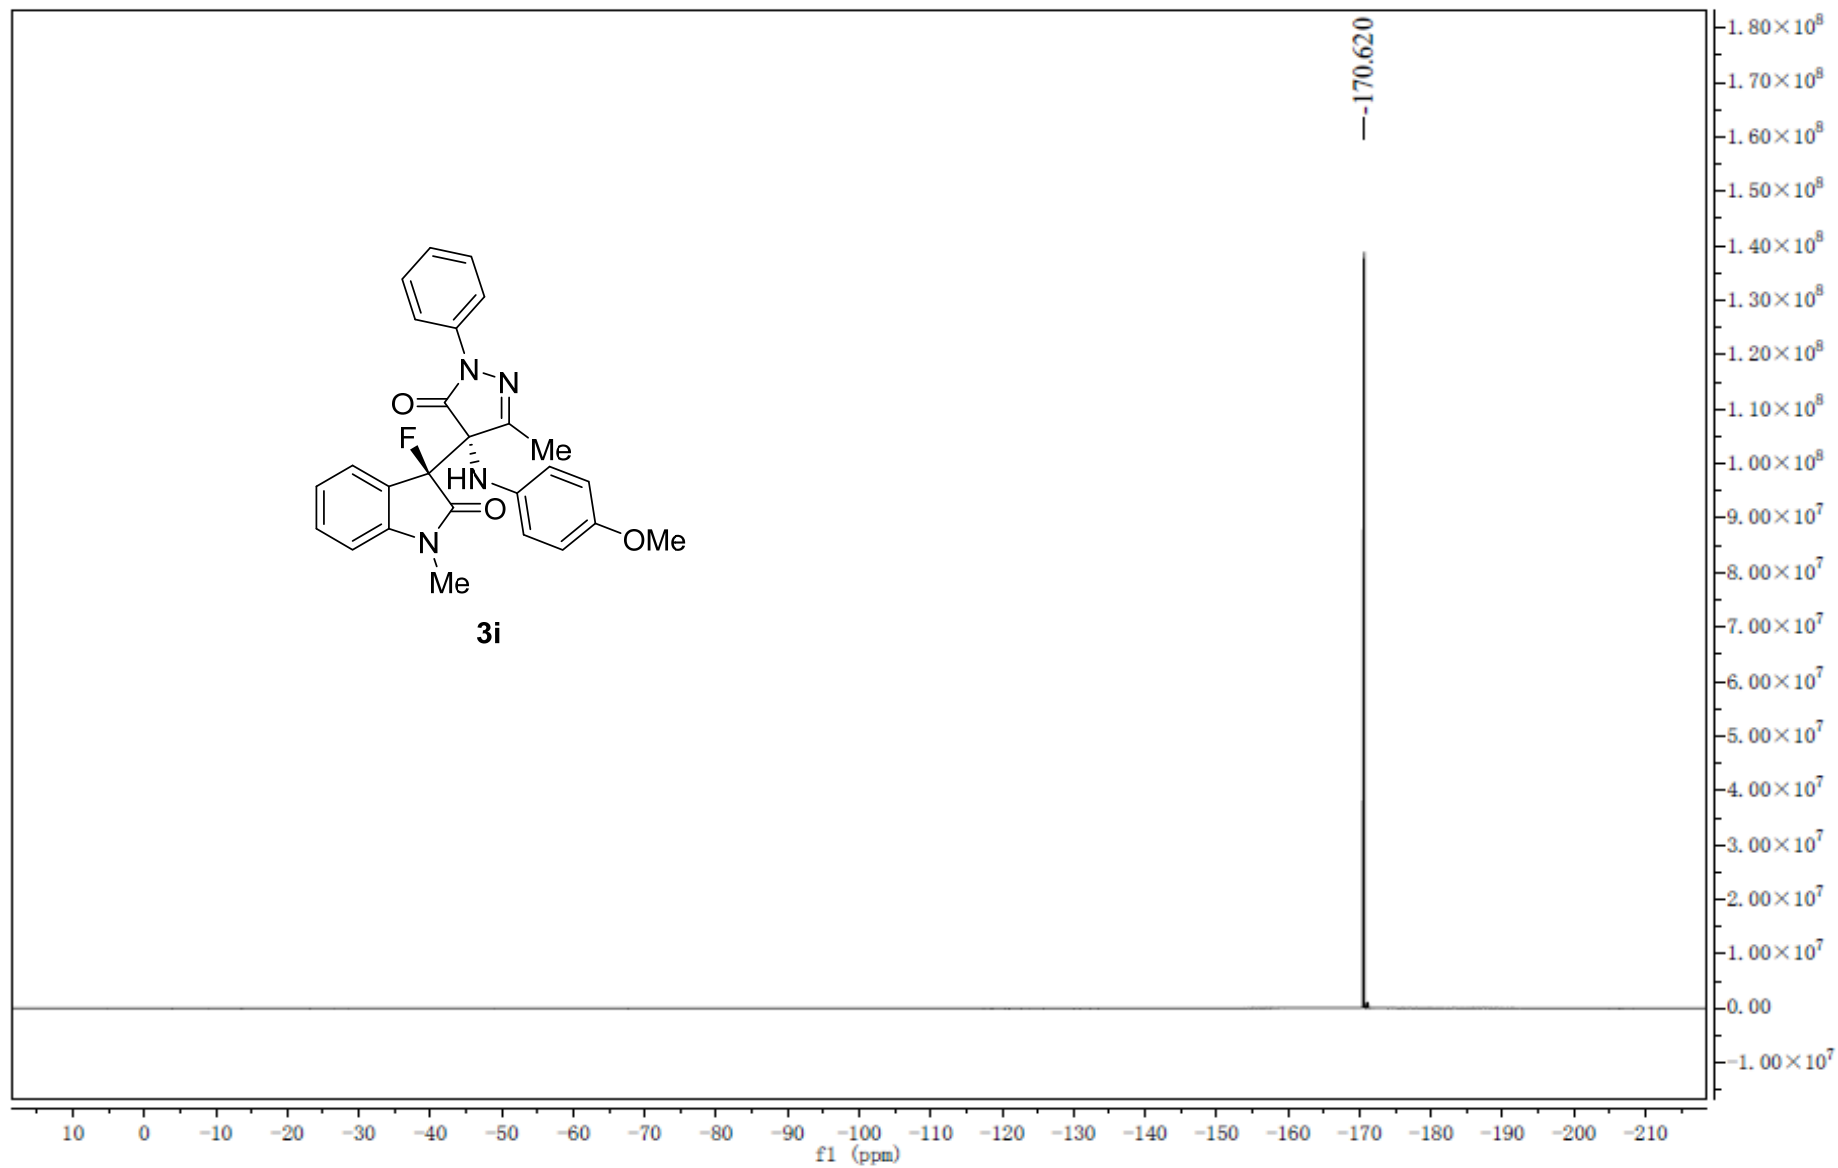

$^{19}\text{F}$  NMR (376 MHz)

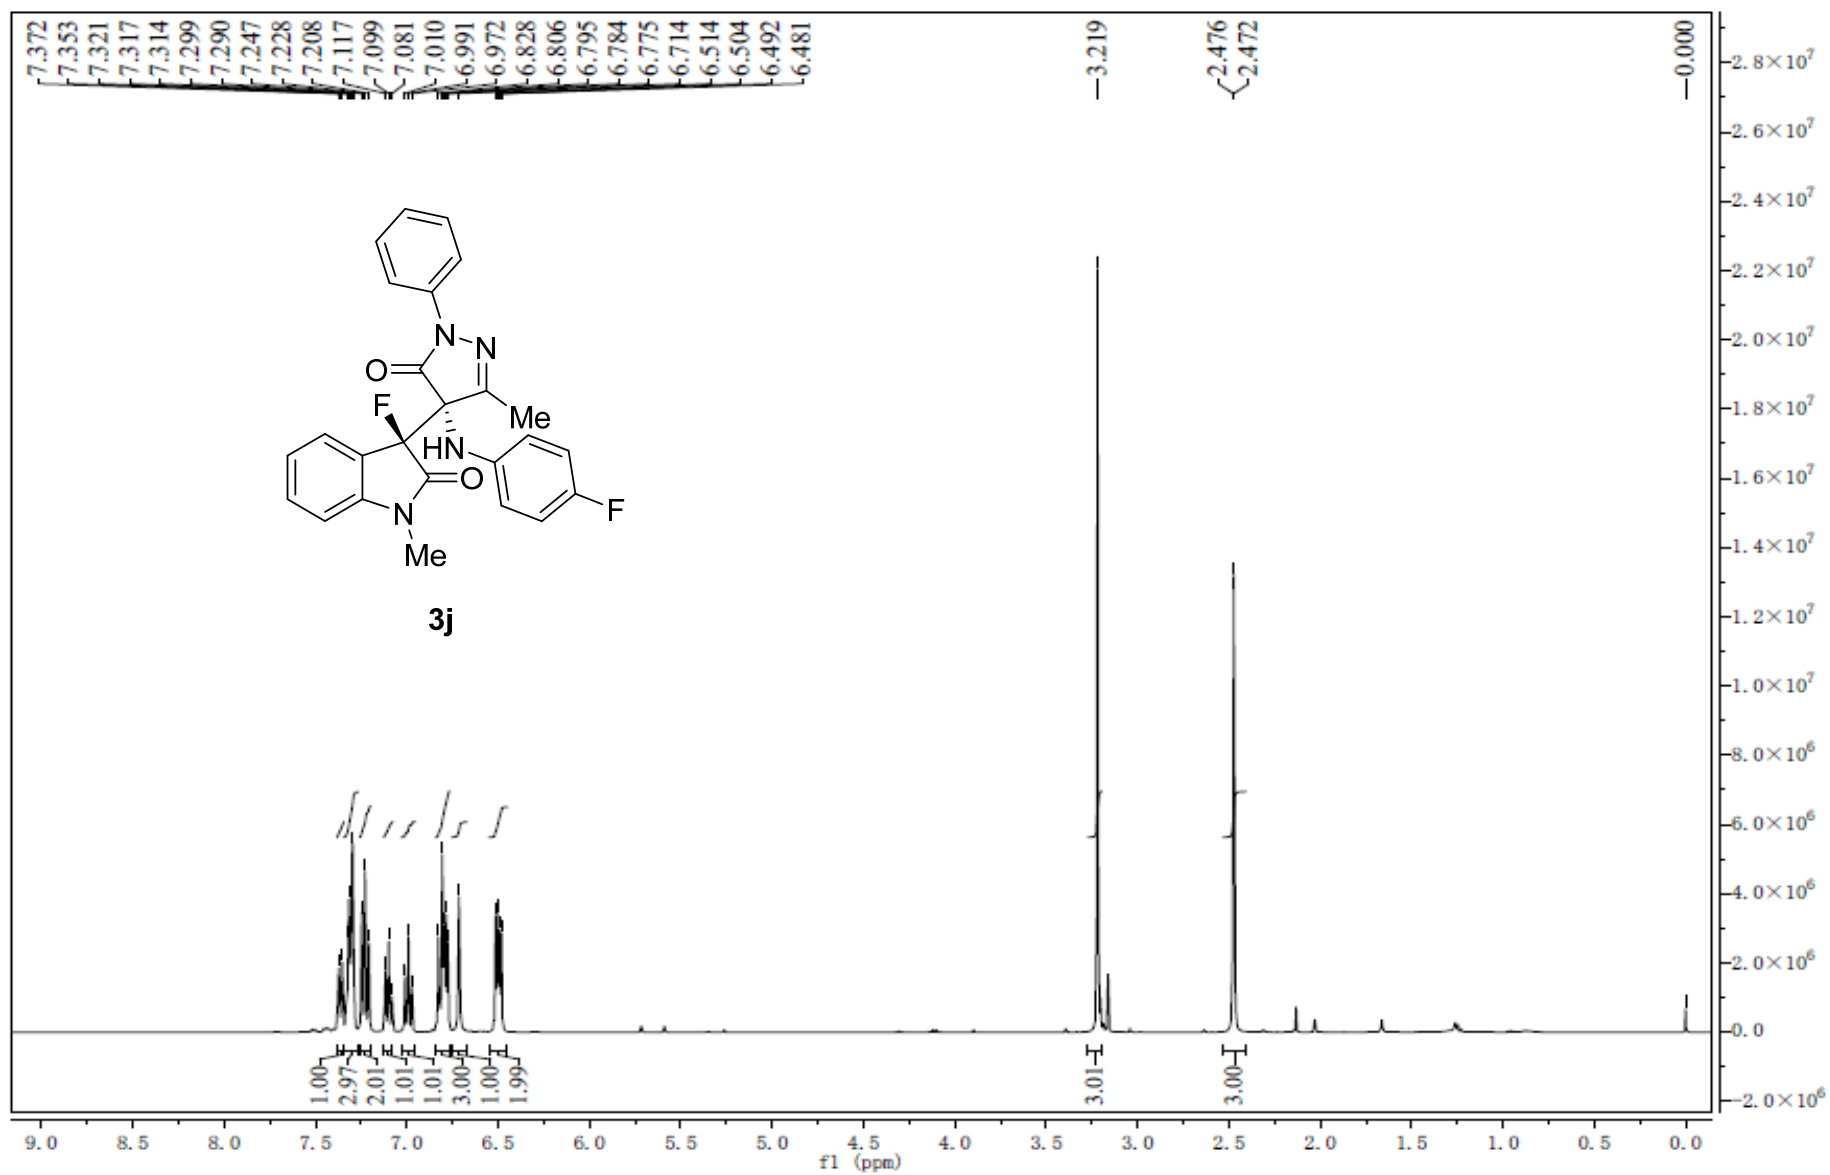

<sup>1</sup>H NMR (400 MHz)

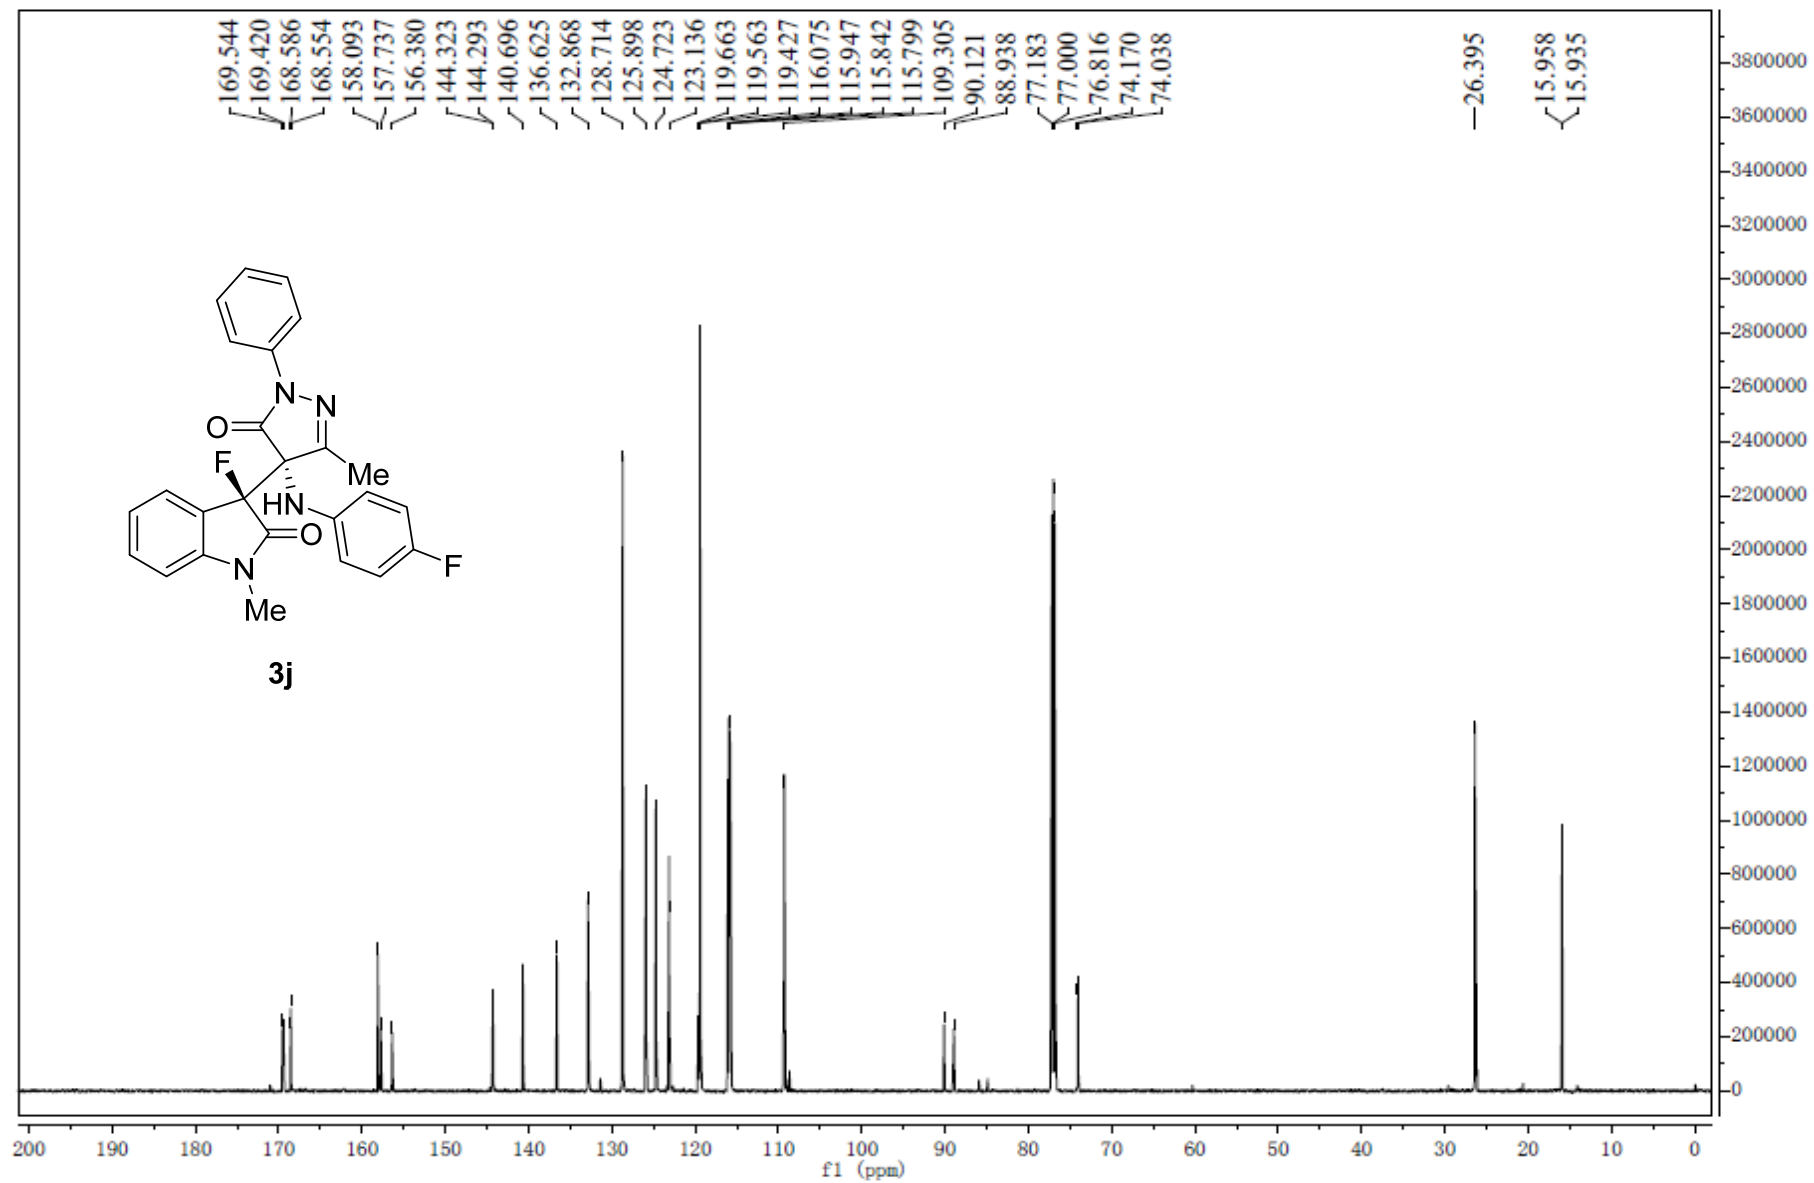

$^{13}\text{C}$  NMR (176 MHz)

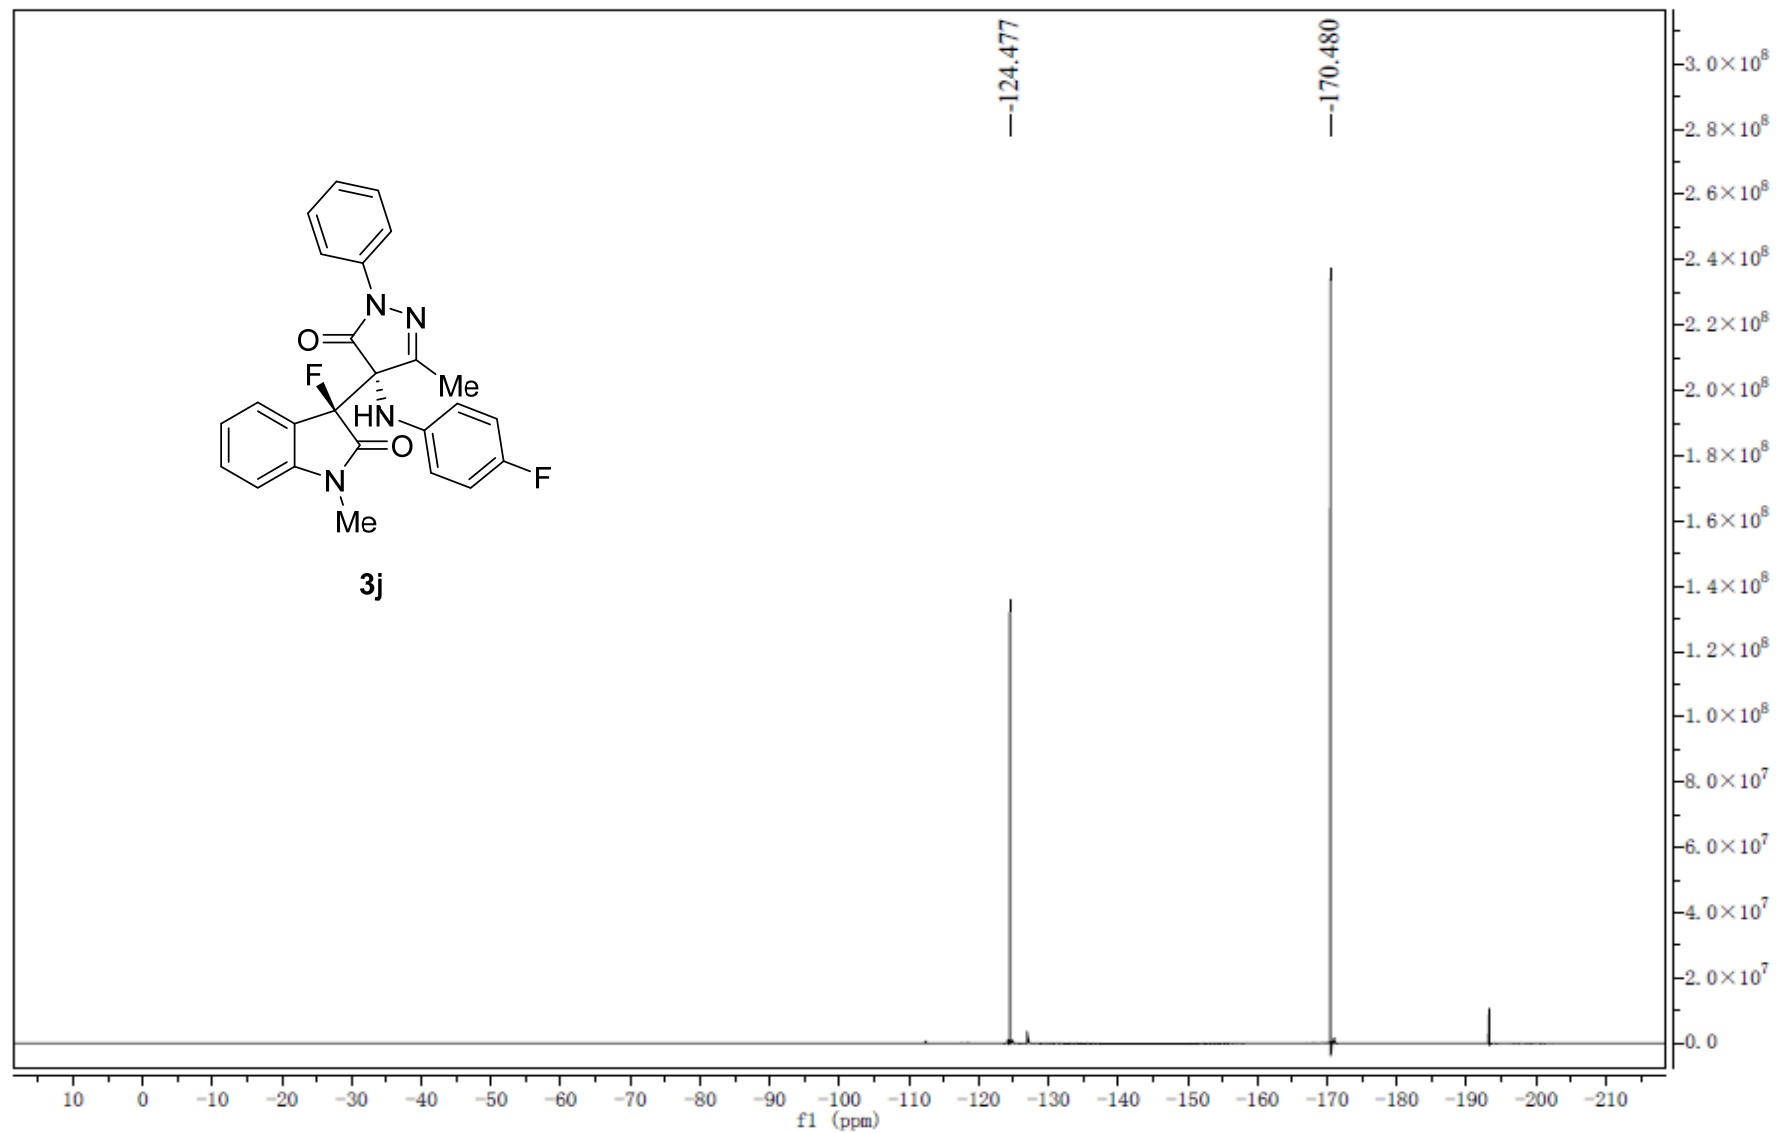

$^{19}\text{F}$  NMR (376 MHz)

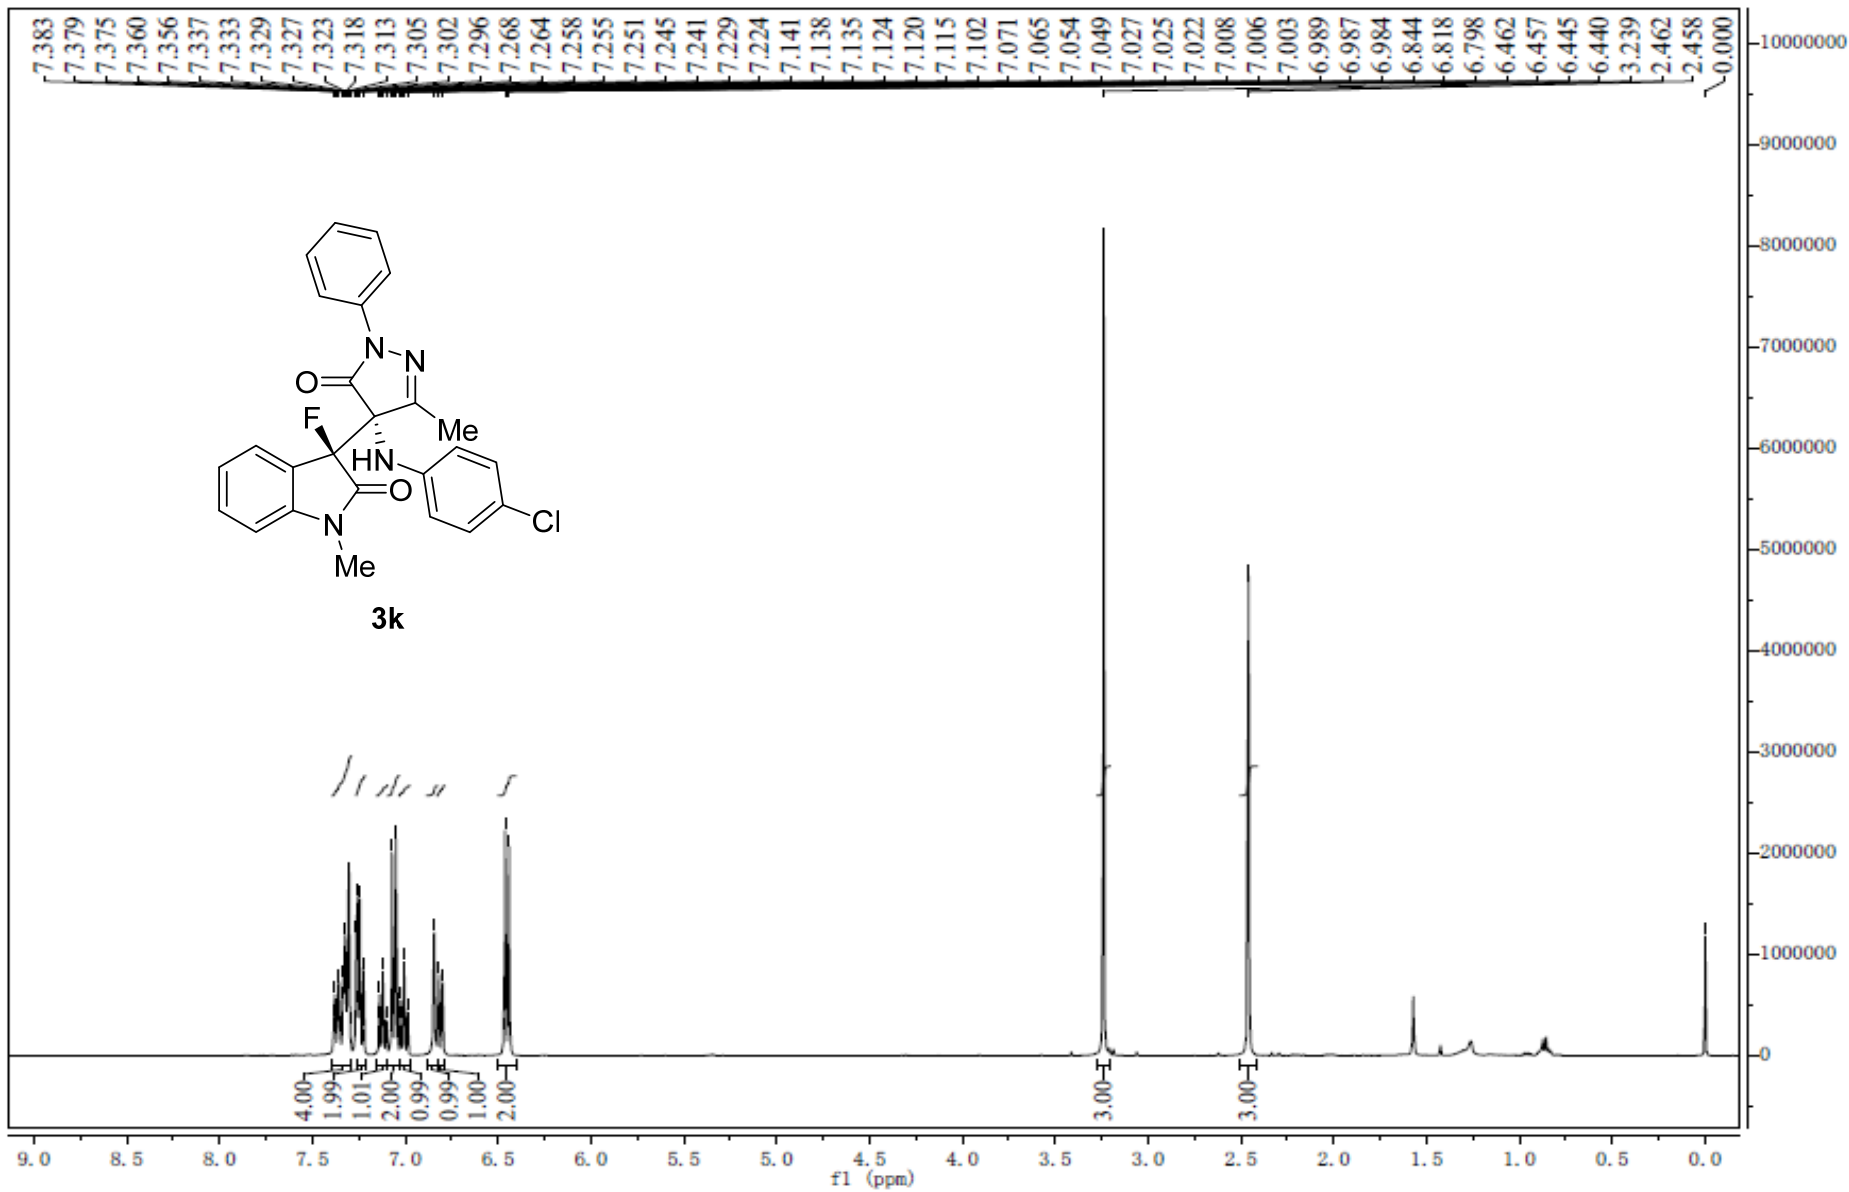

$^1\text{H NMR}$  (400 MHz)

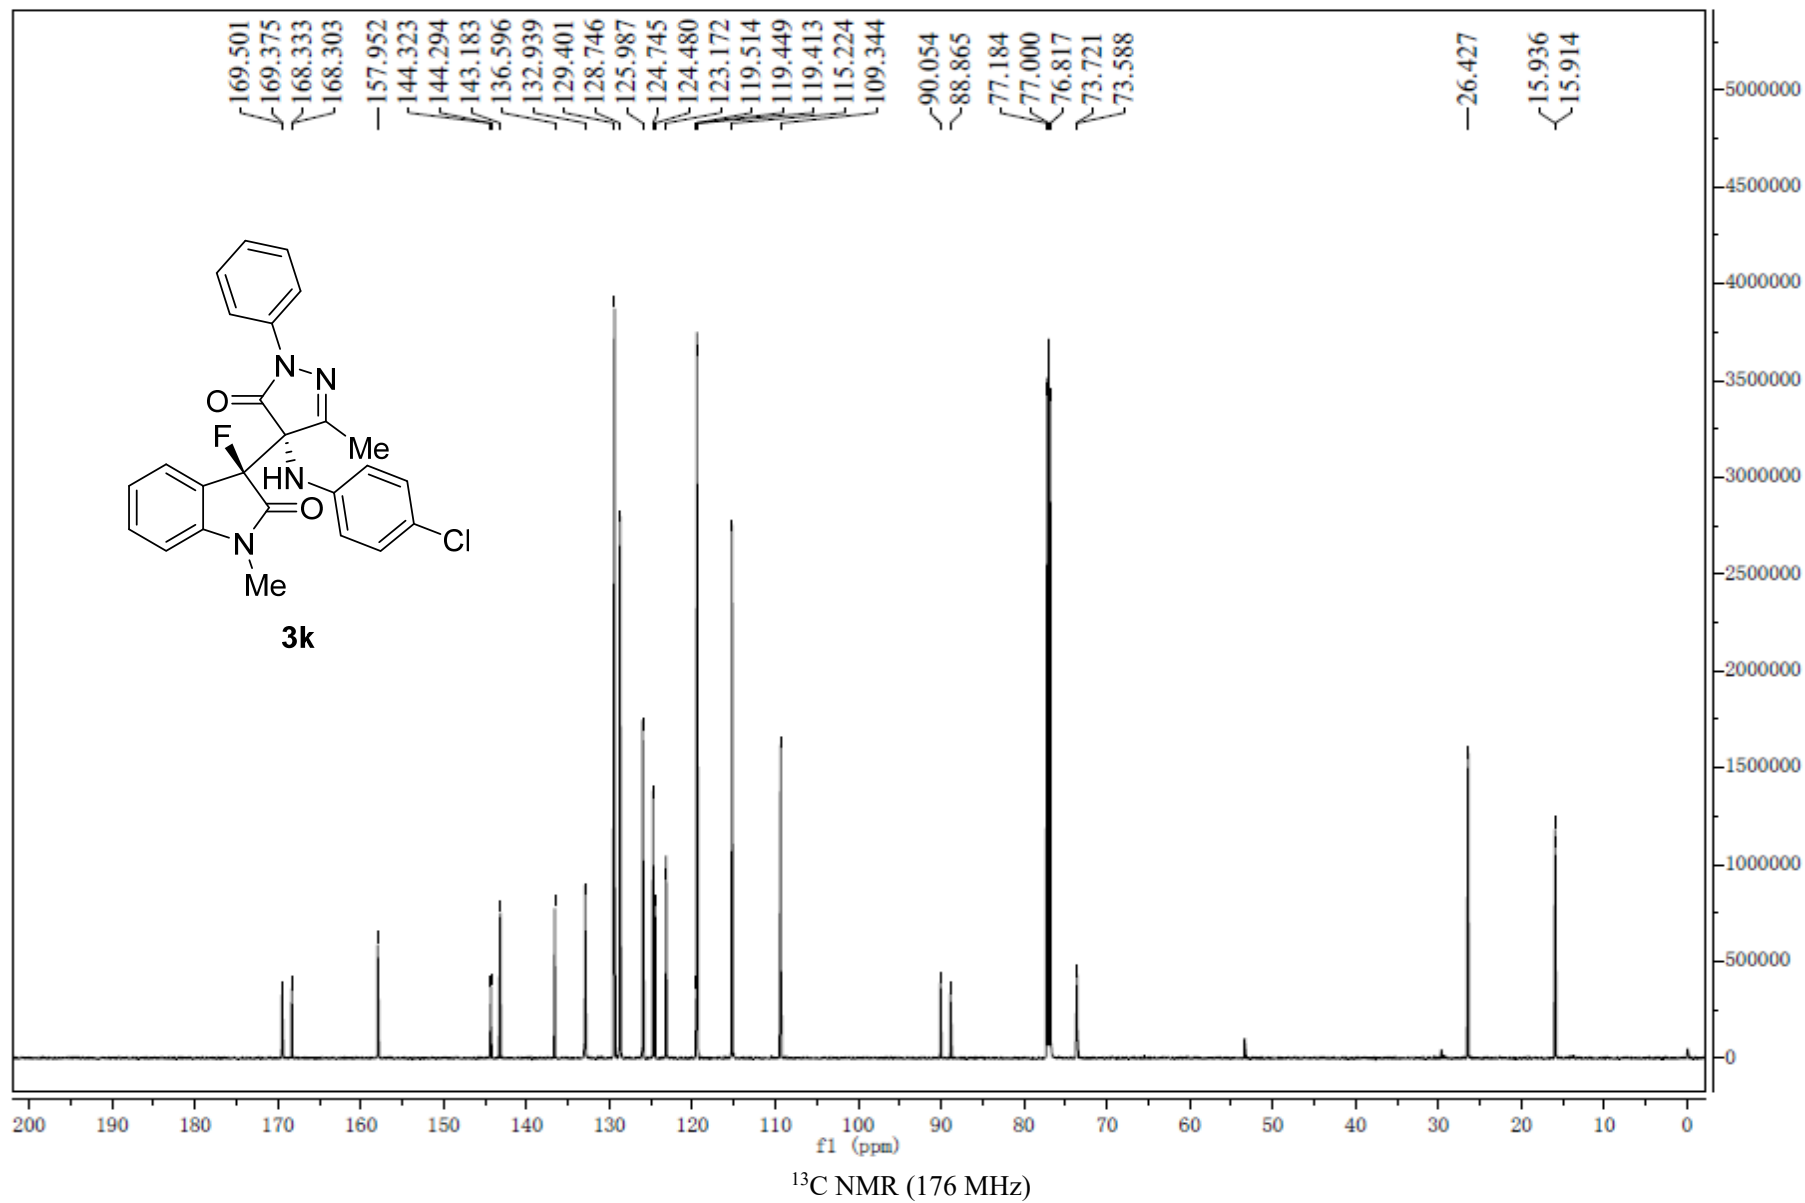



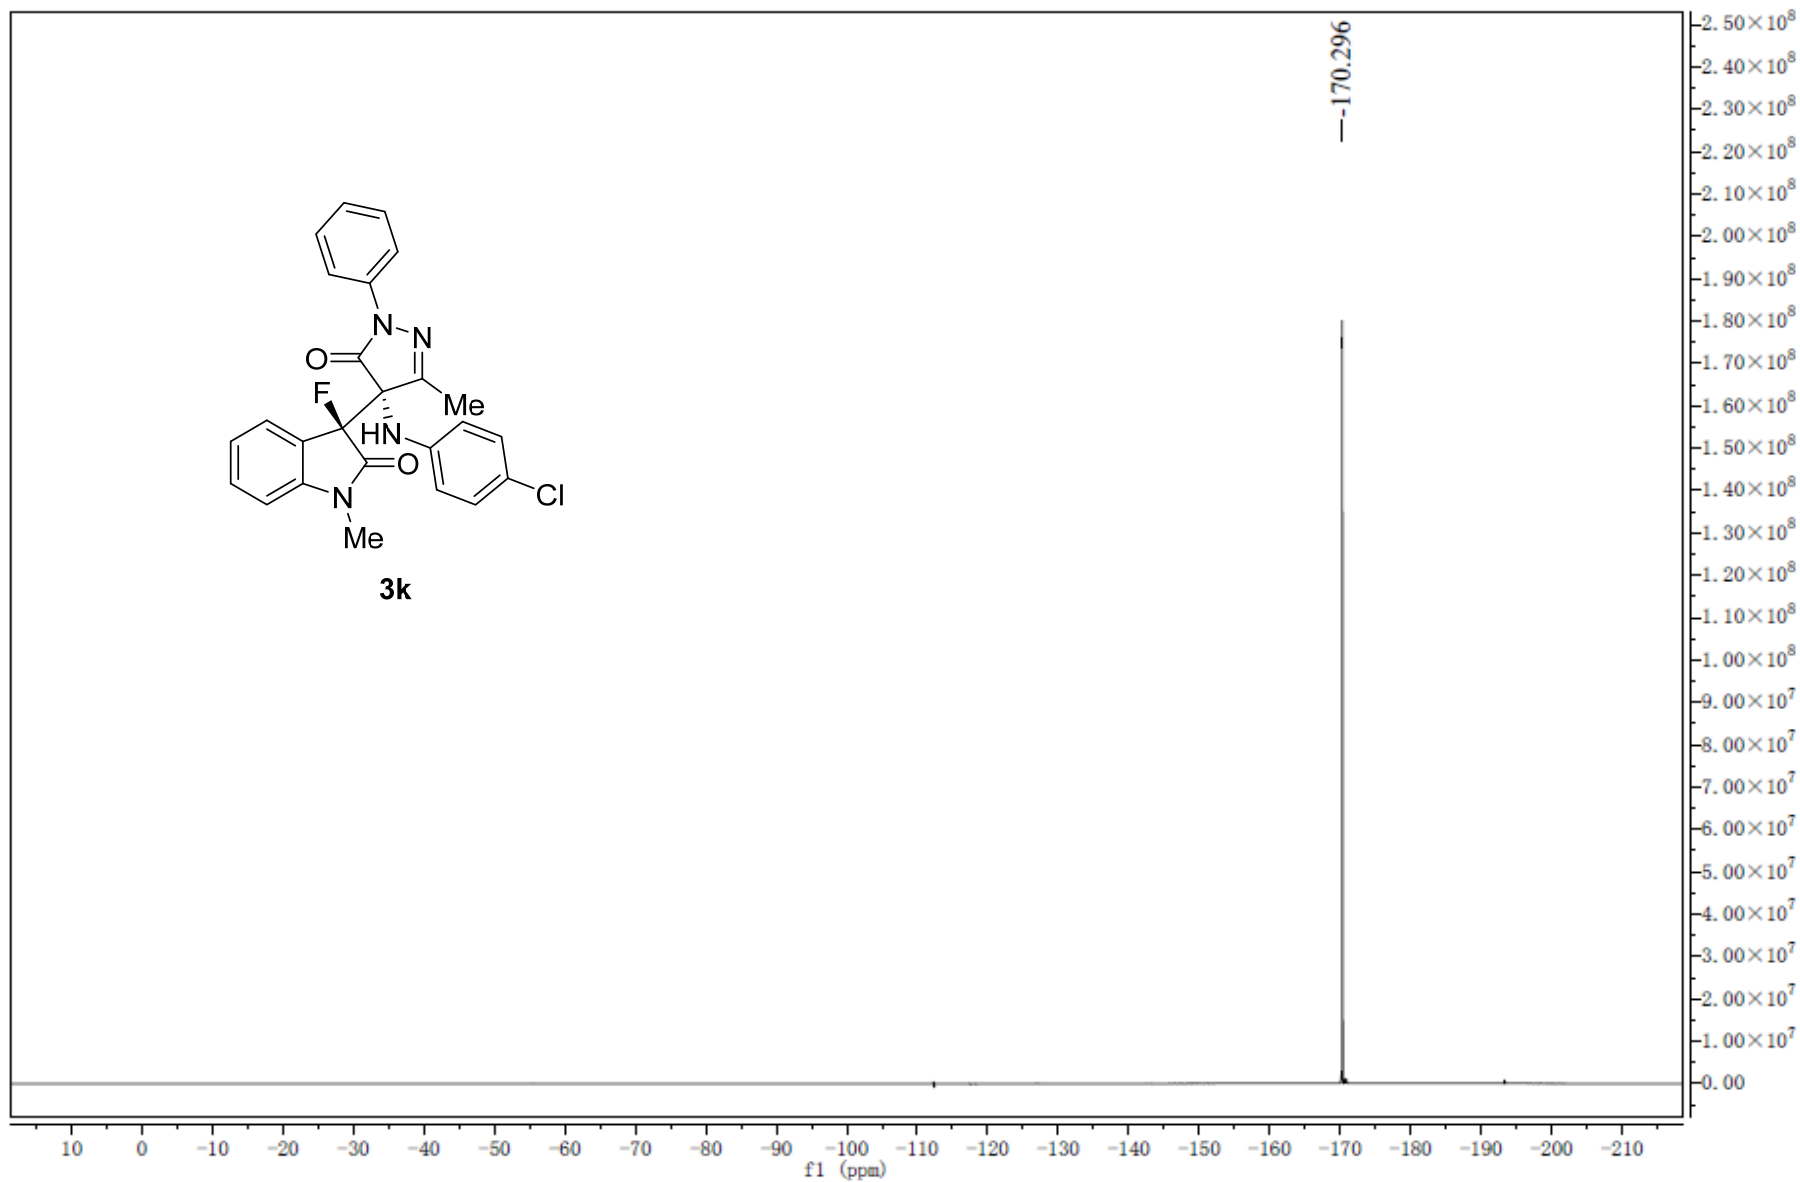

$^{19}\text{F}$  NMR (376 MHz)

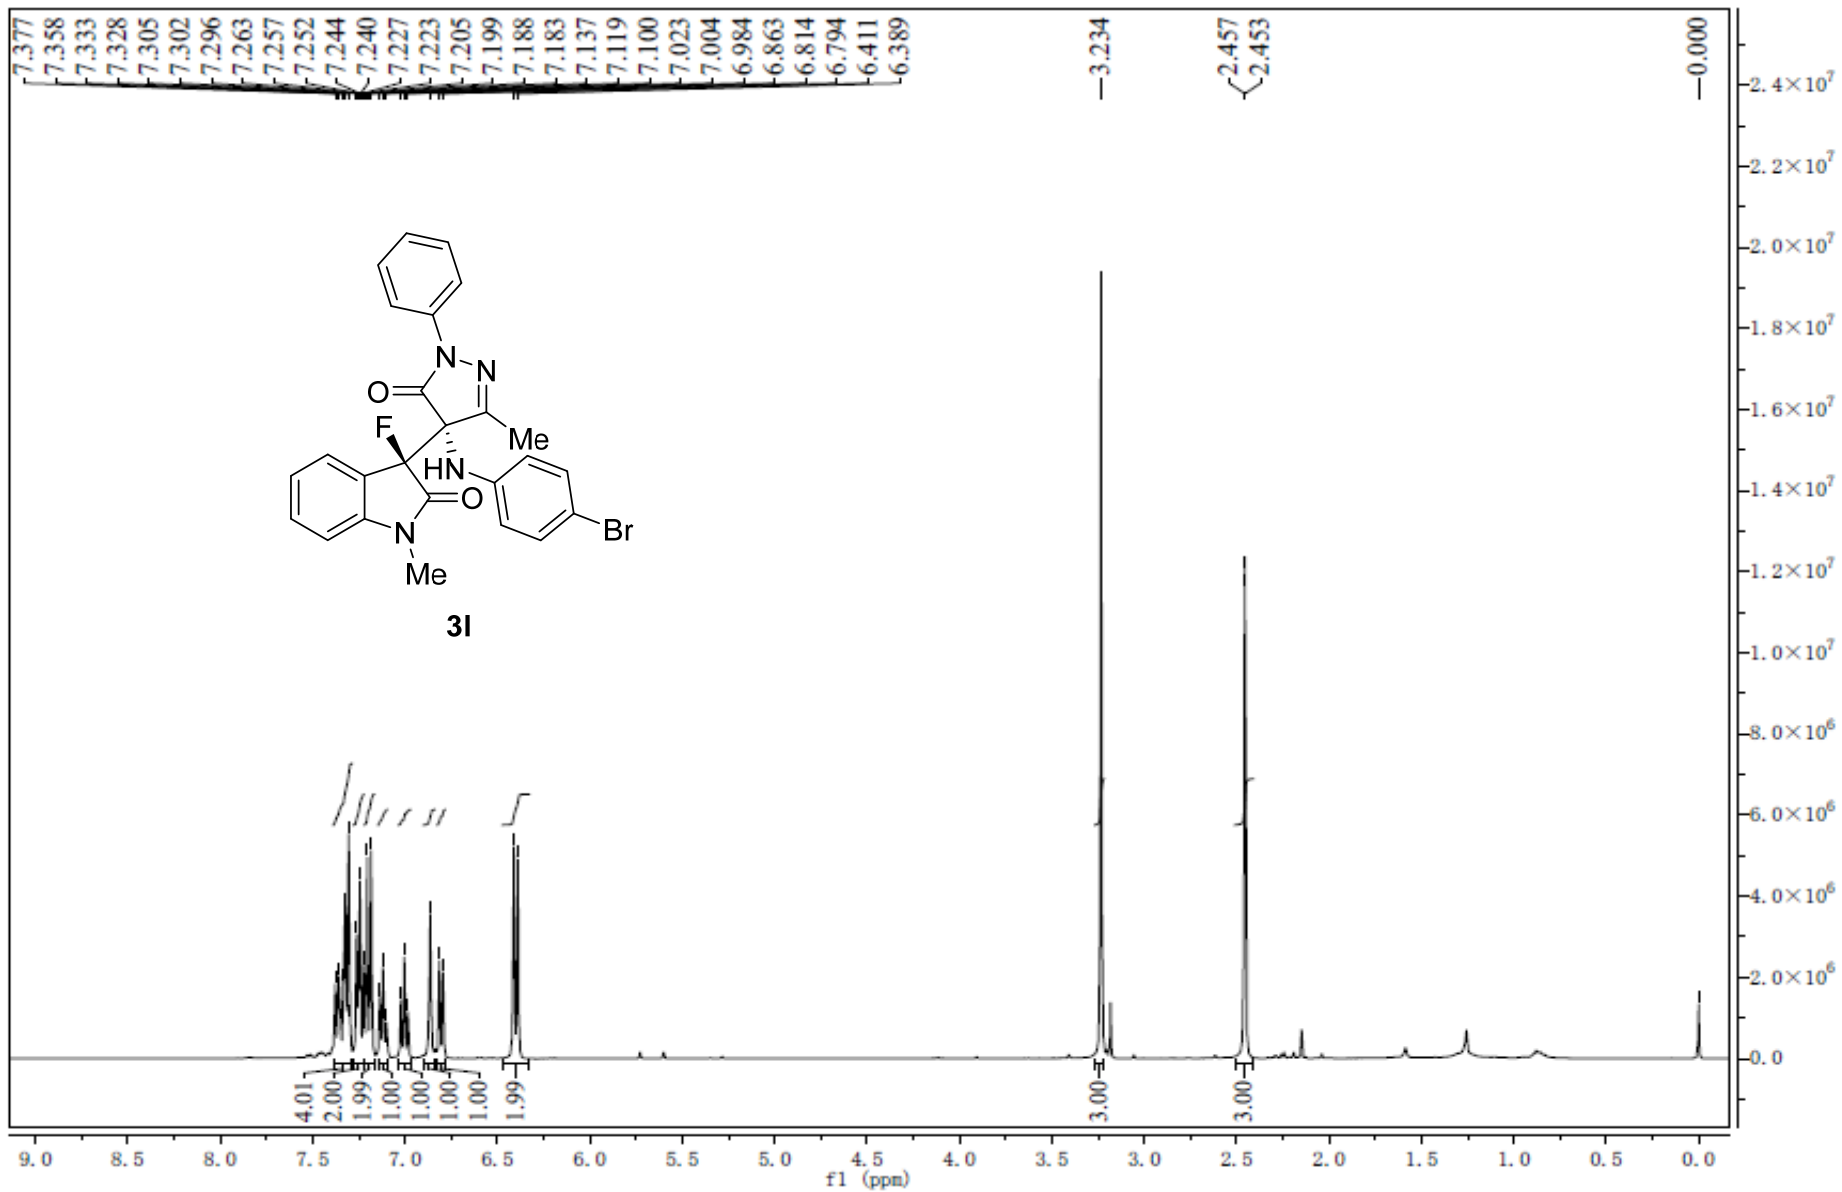

<sup>1</sup>H NMR (400 MHz)

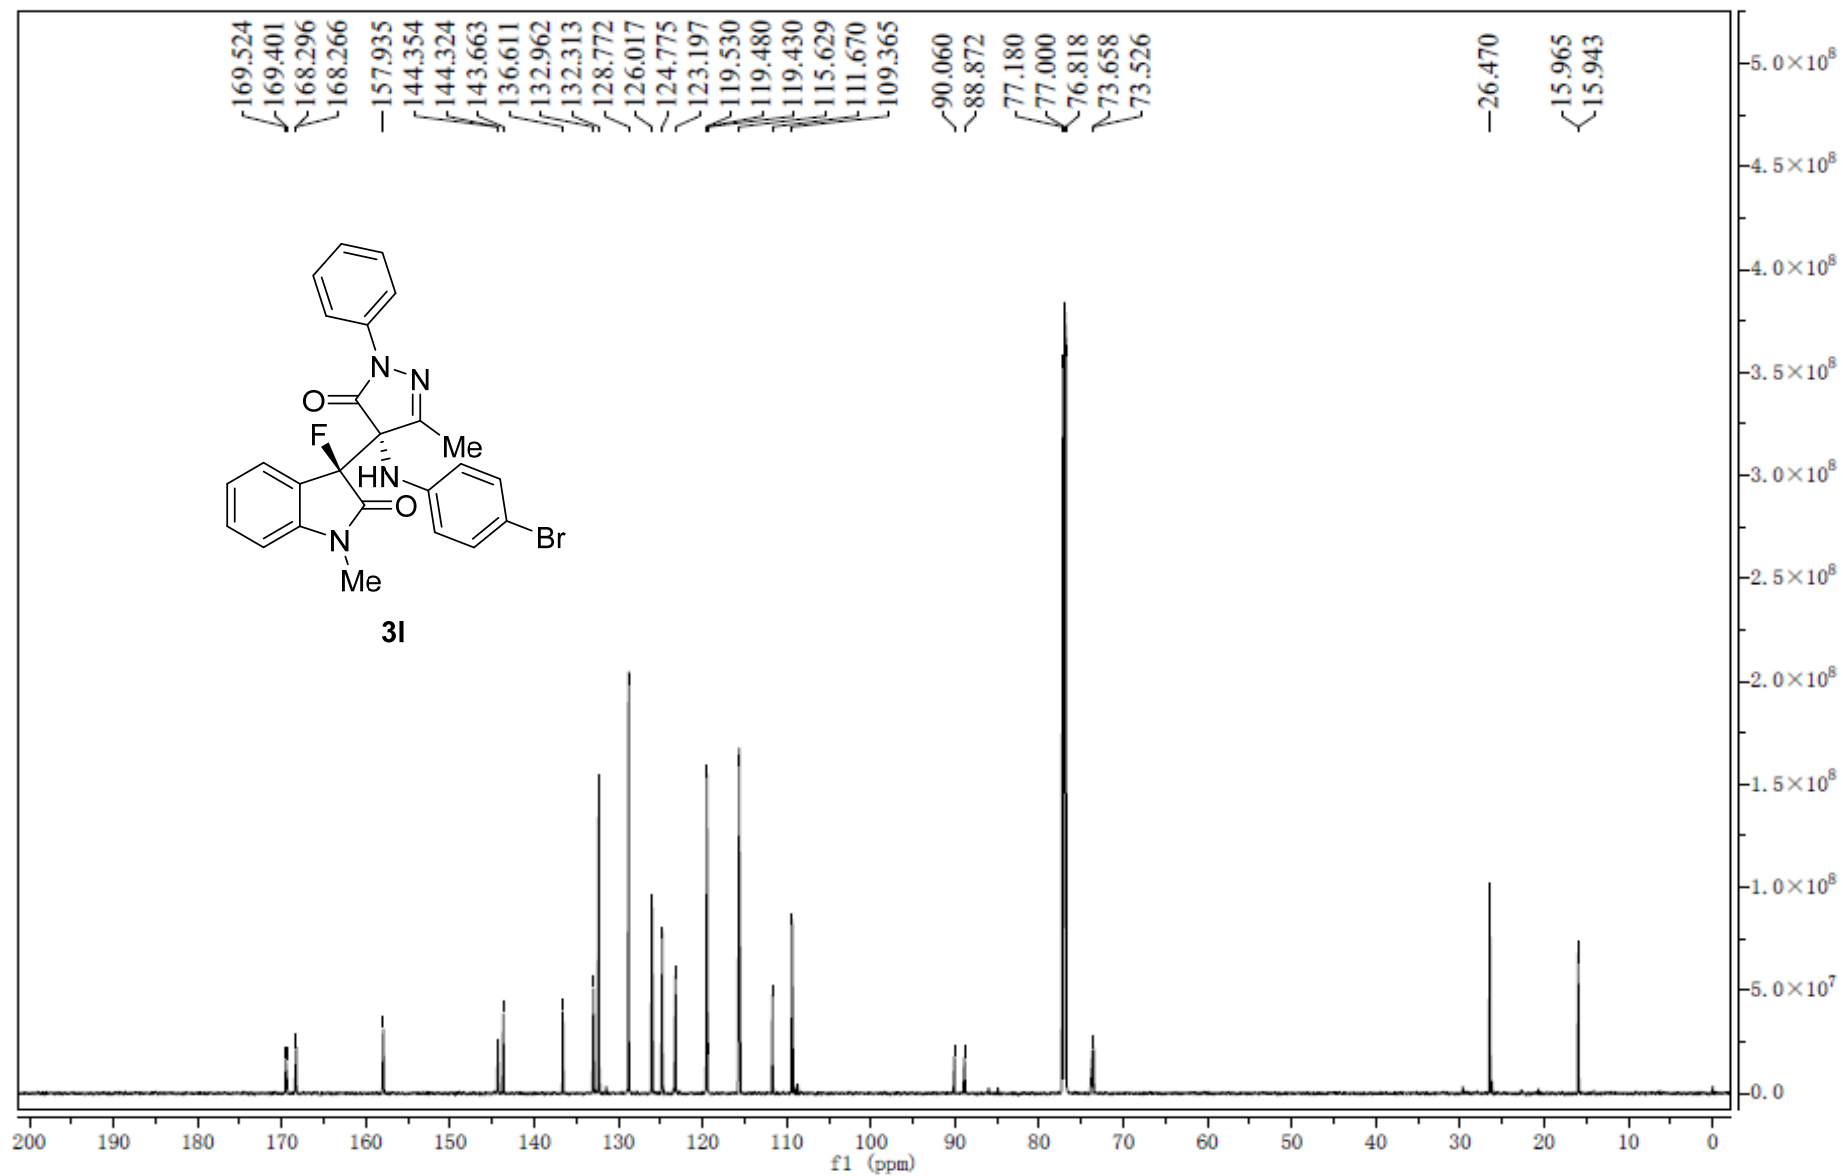

$^{13}\text{C}$  NMR (176 MHz)

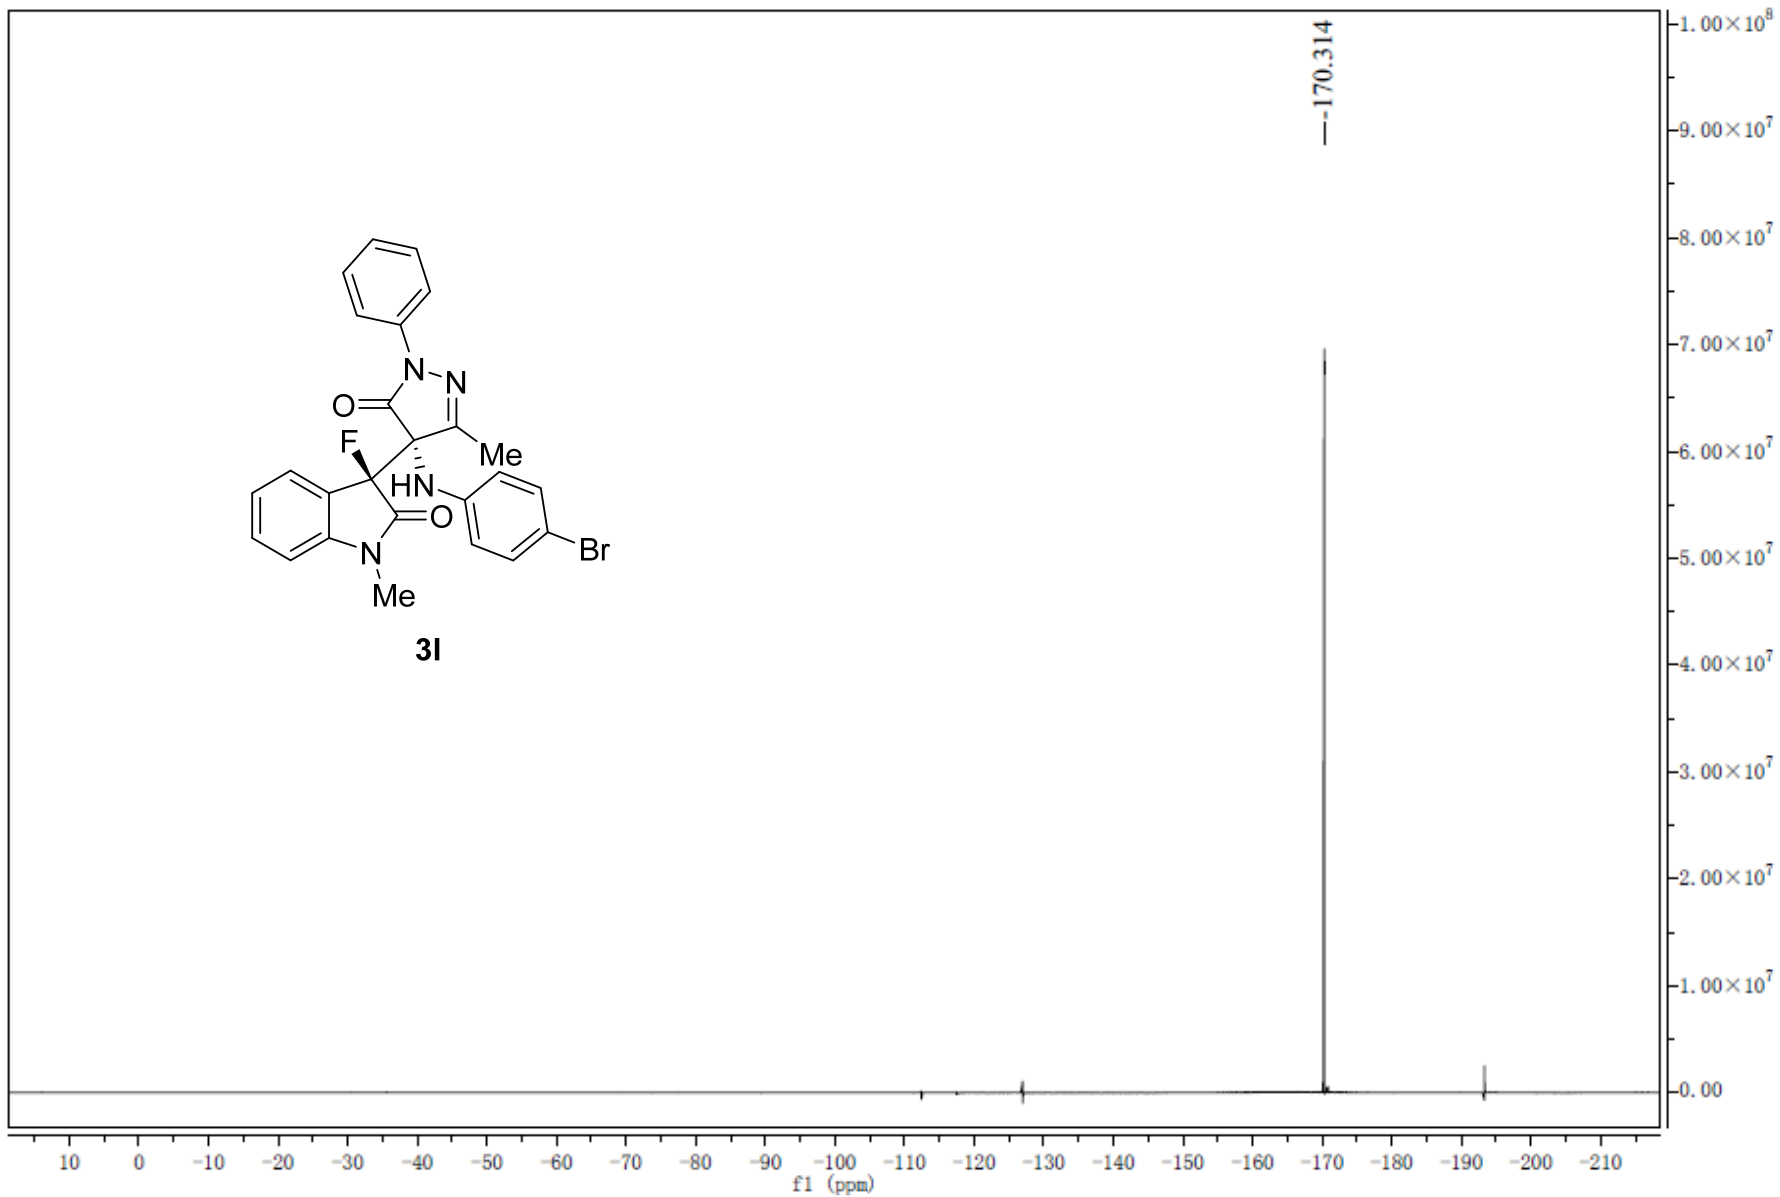

$^{19}\text{F}$  NMR (376 MHz)

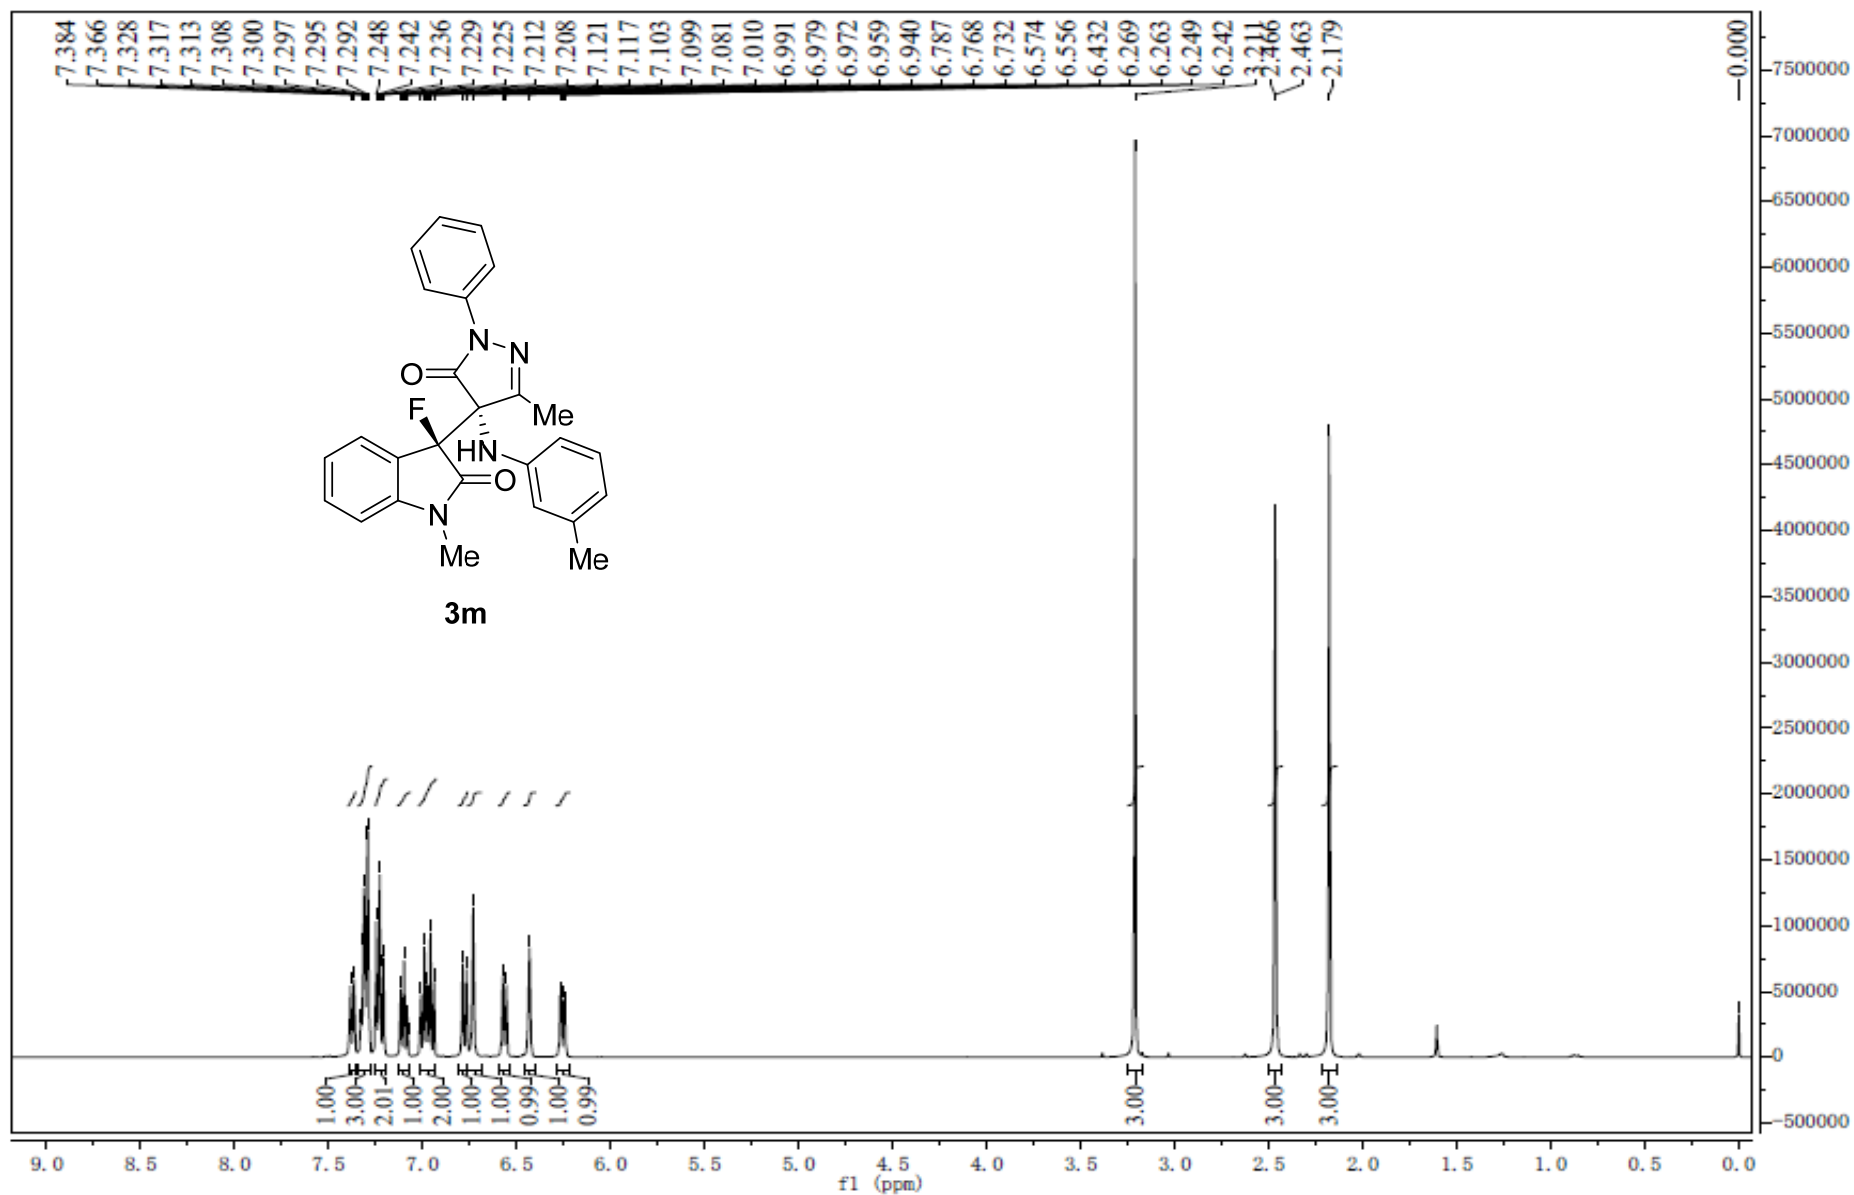

$^1\text{H NMR}$  (400 MHz)

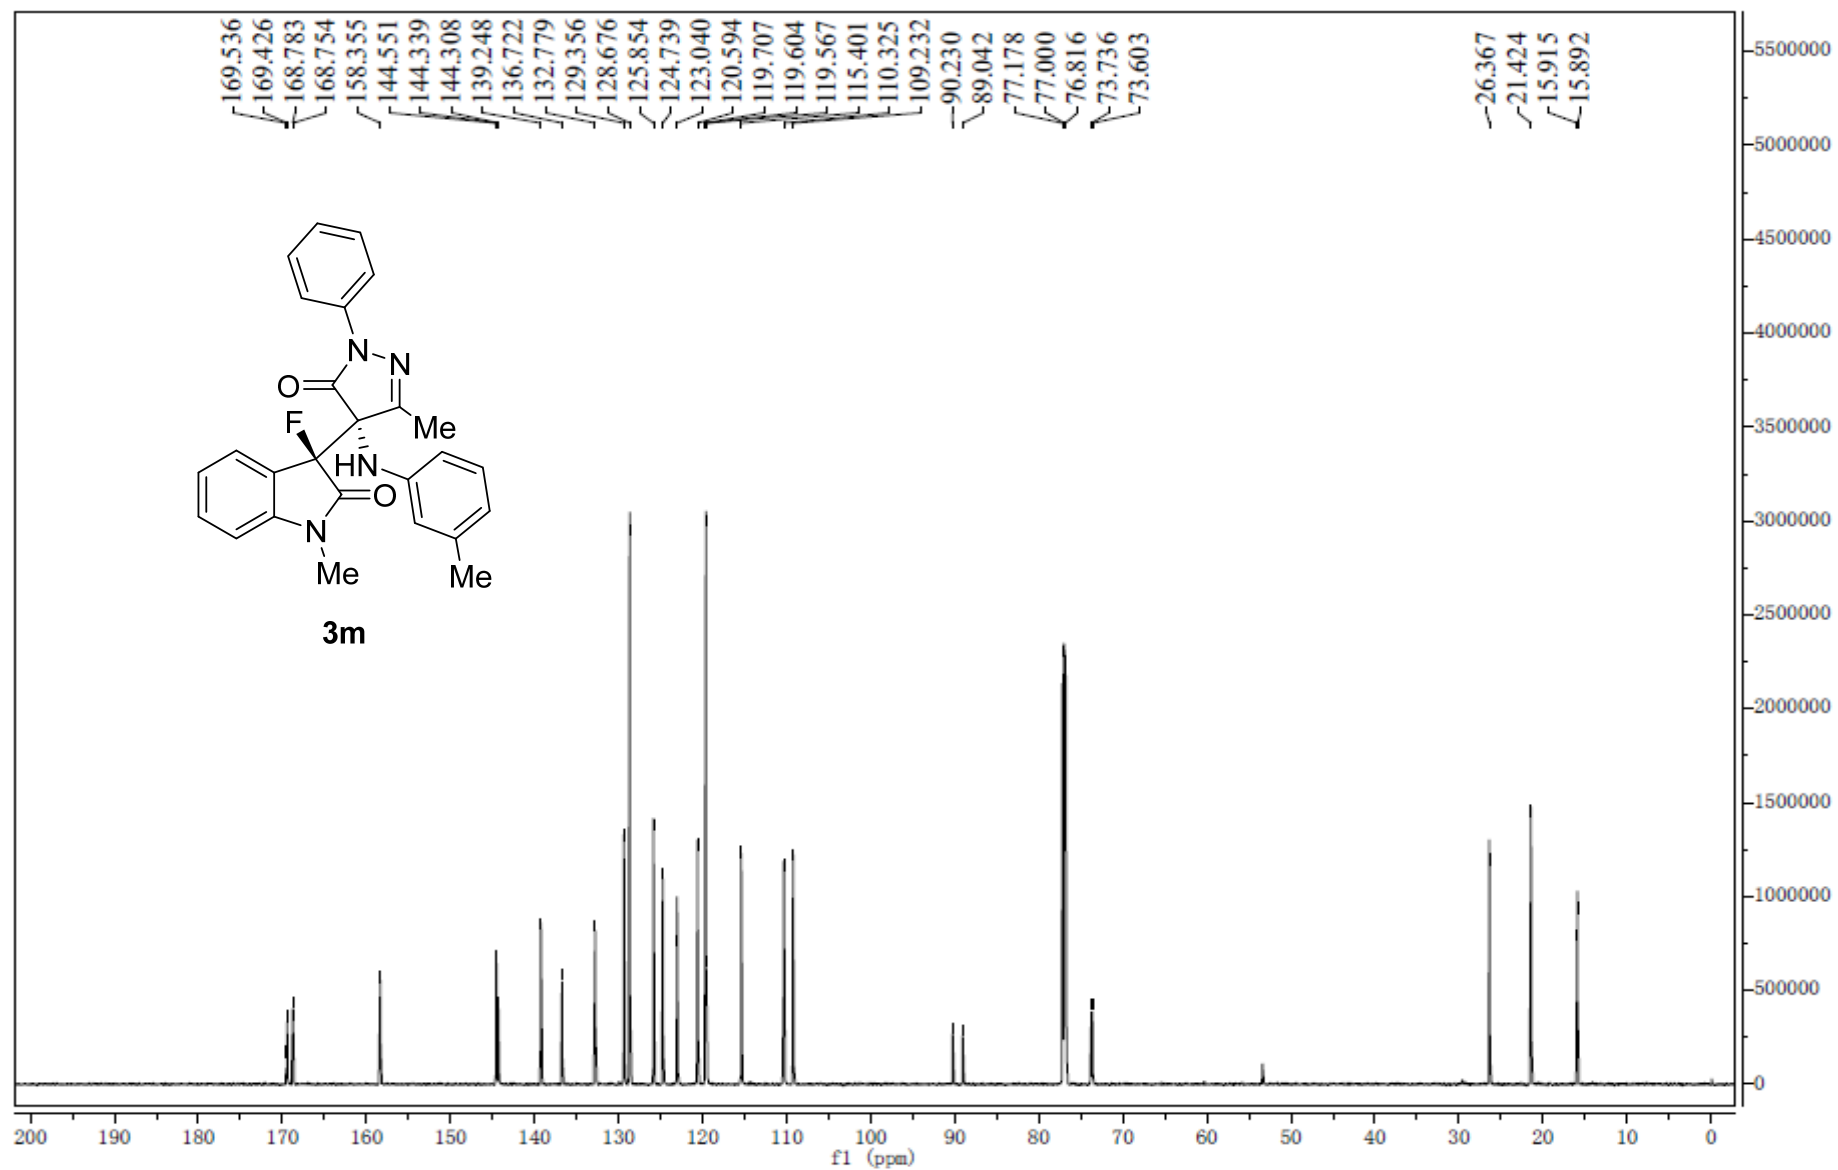

<sup>13</sup>C NMR (176 MHz)

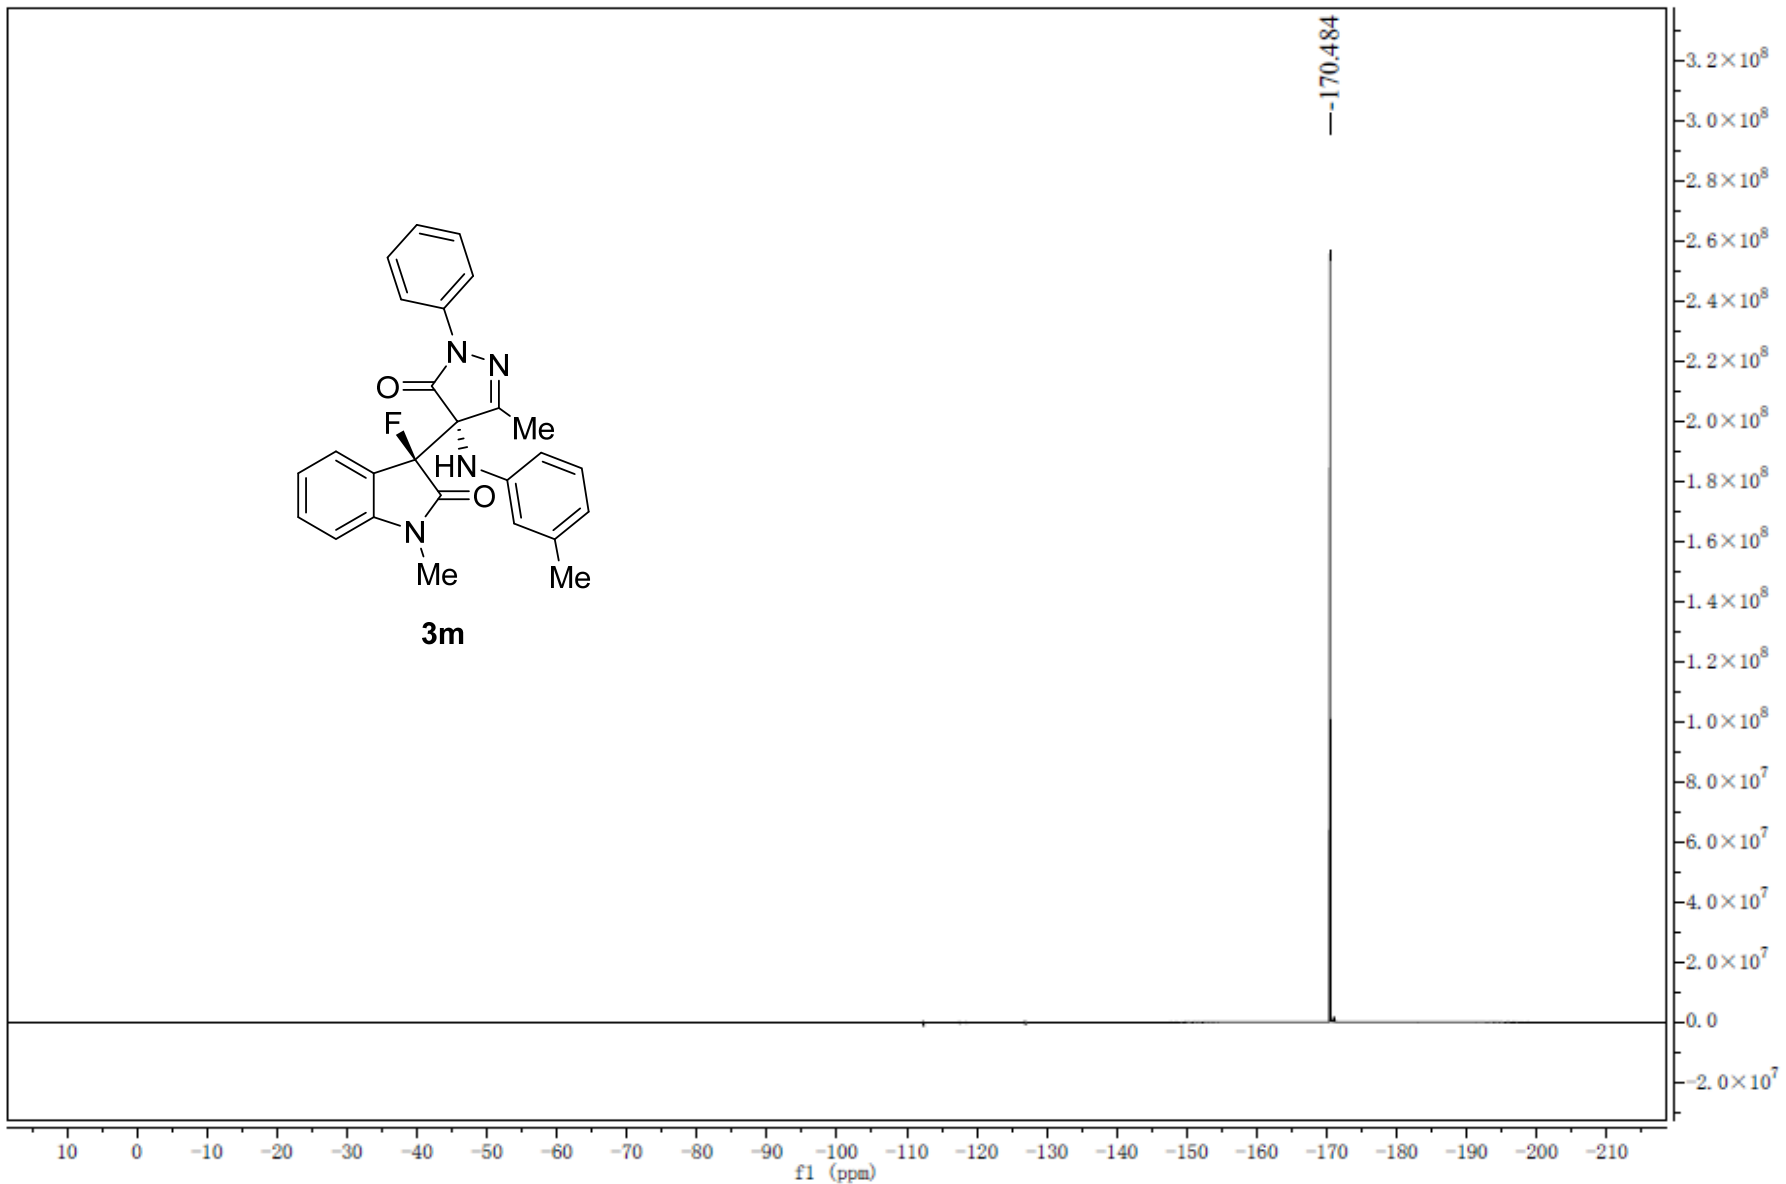

$^{19}\text{F}$  NMR (376 MHz)

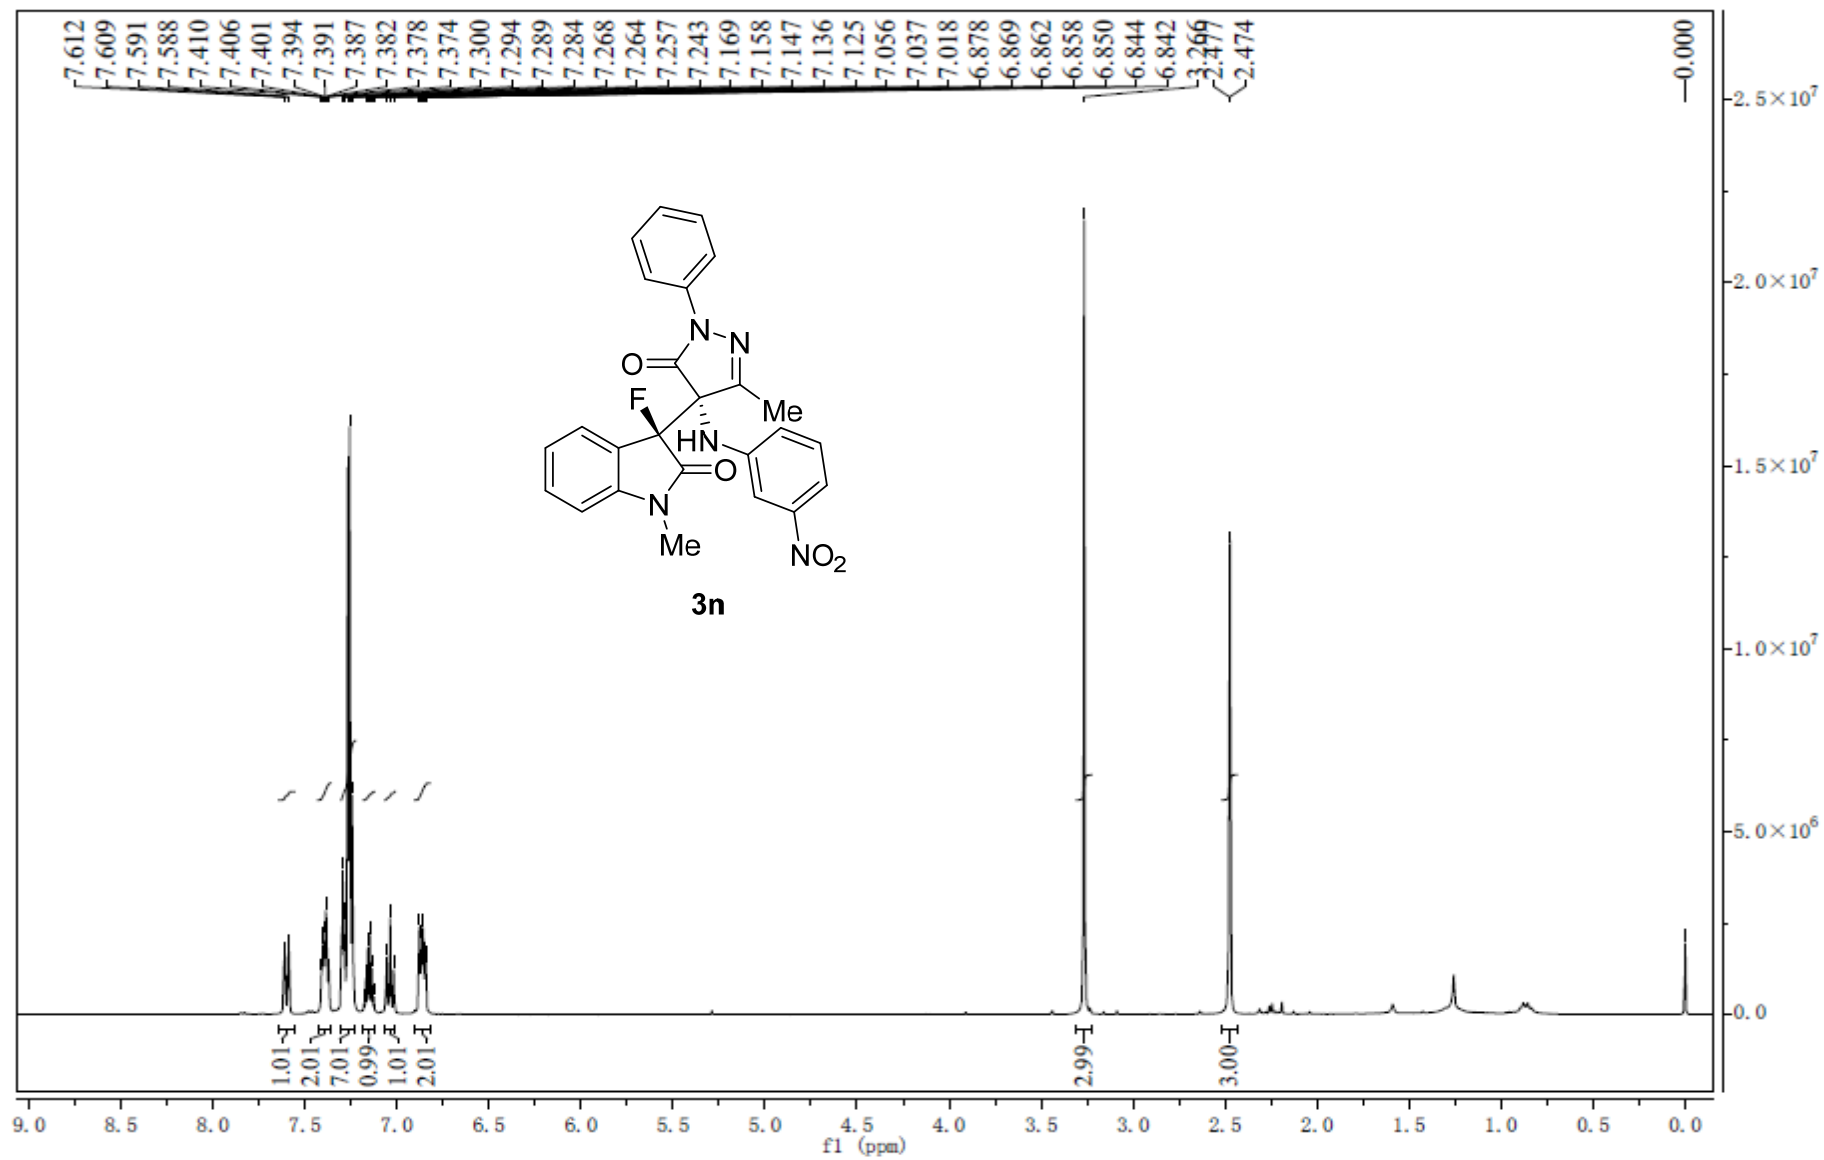

<sup>1</sup>H NMR (400 MHz)



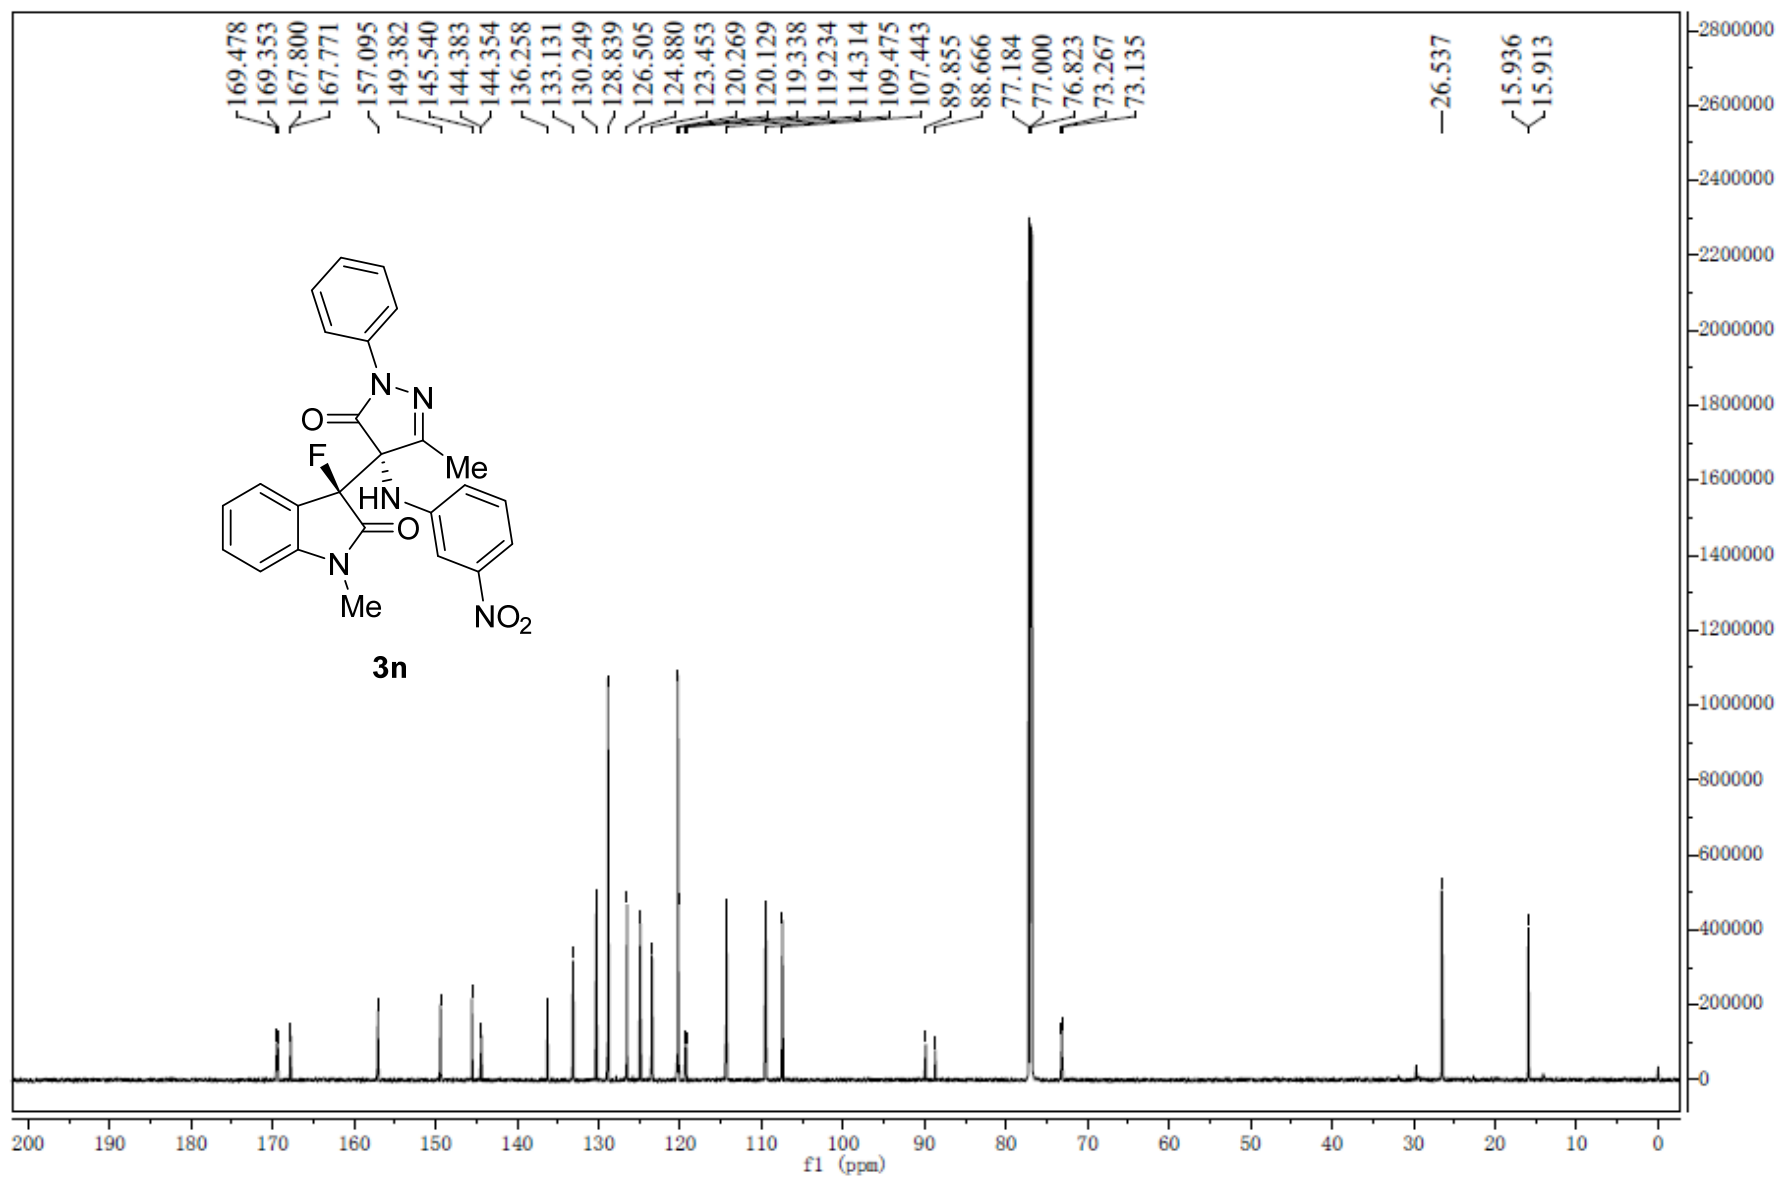

<sup>13</sup>C NMR (176 MHz)

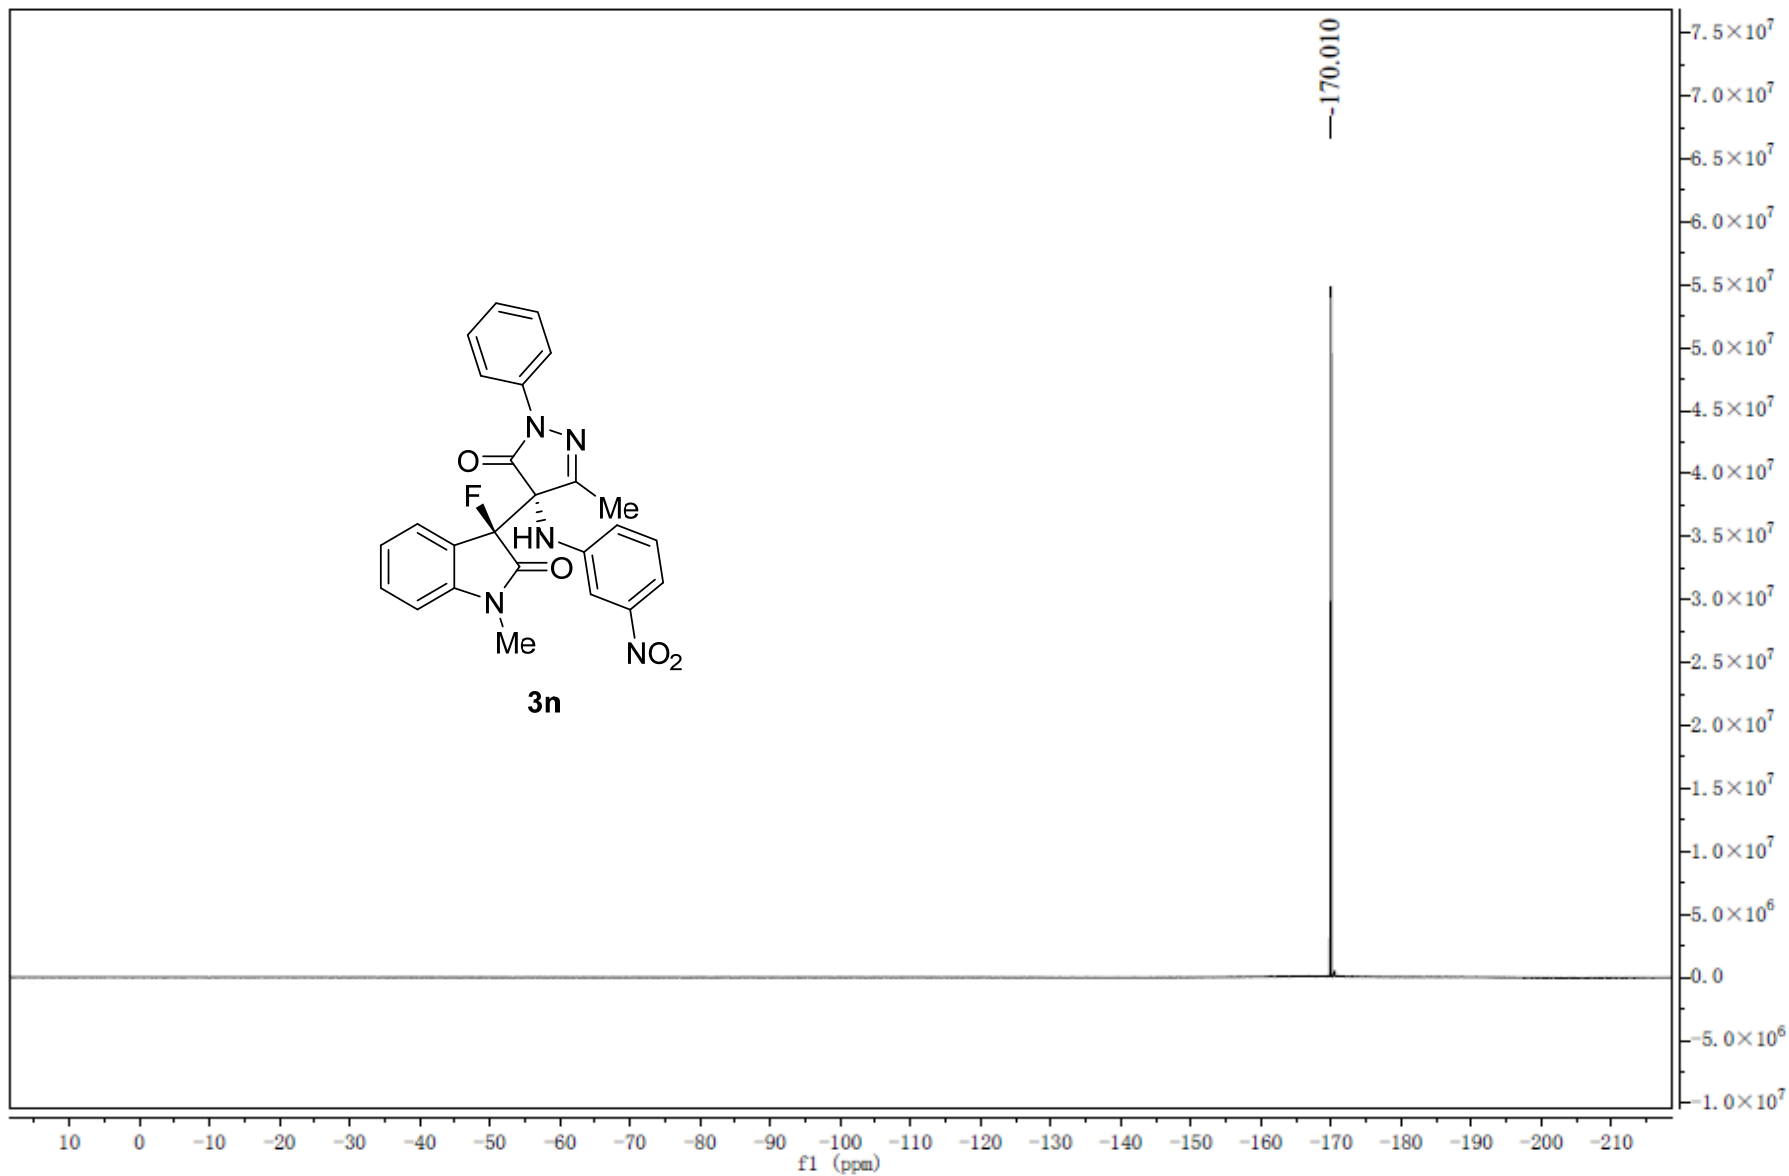

$^{19}\text{F}$  NMR (376 MHz)

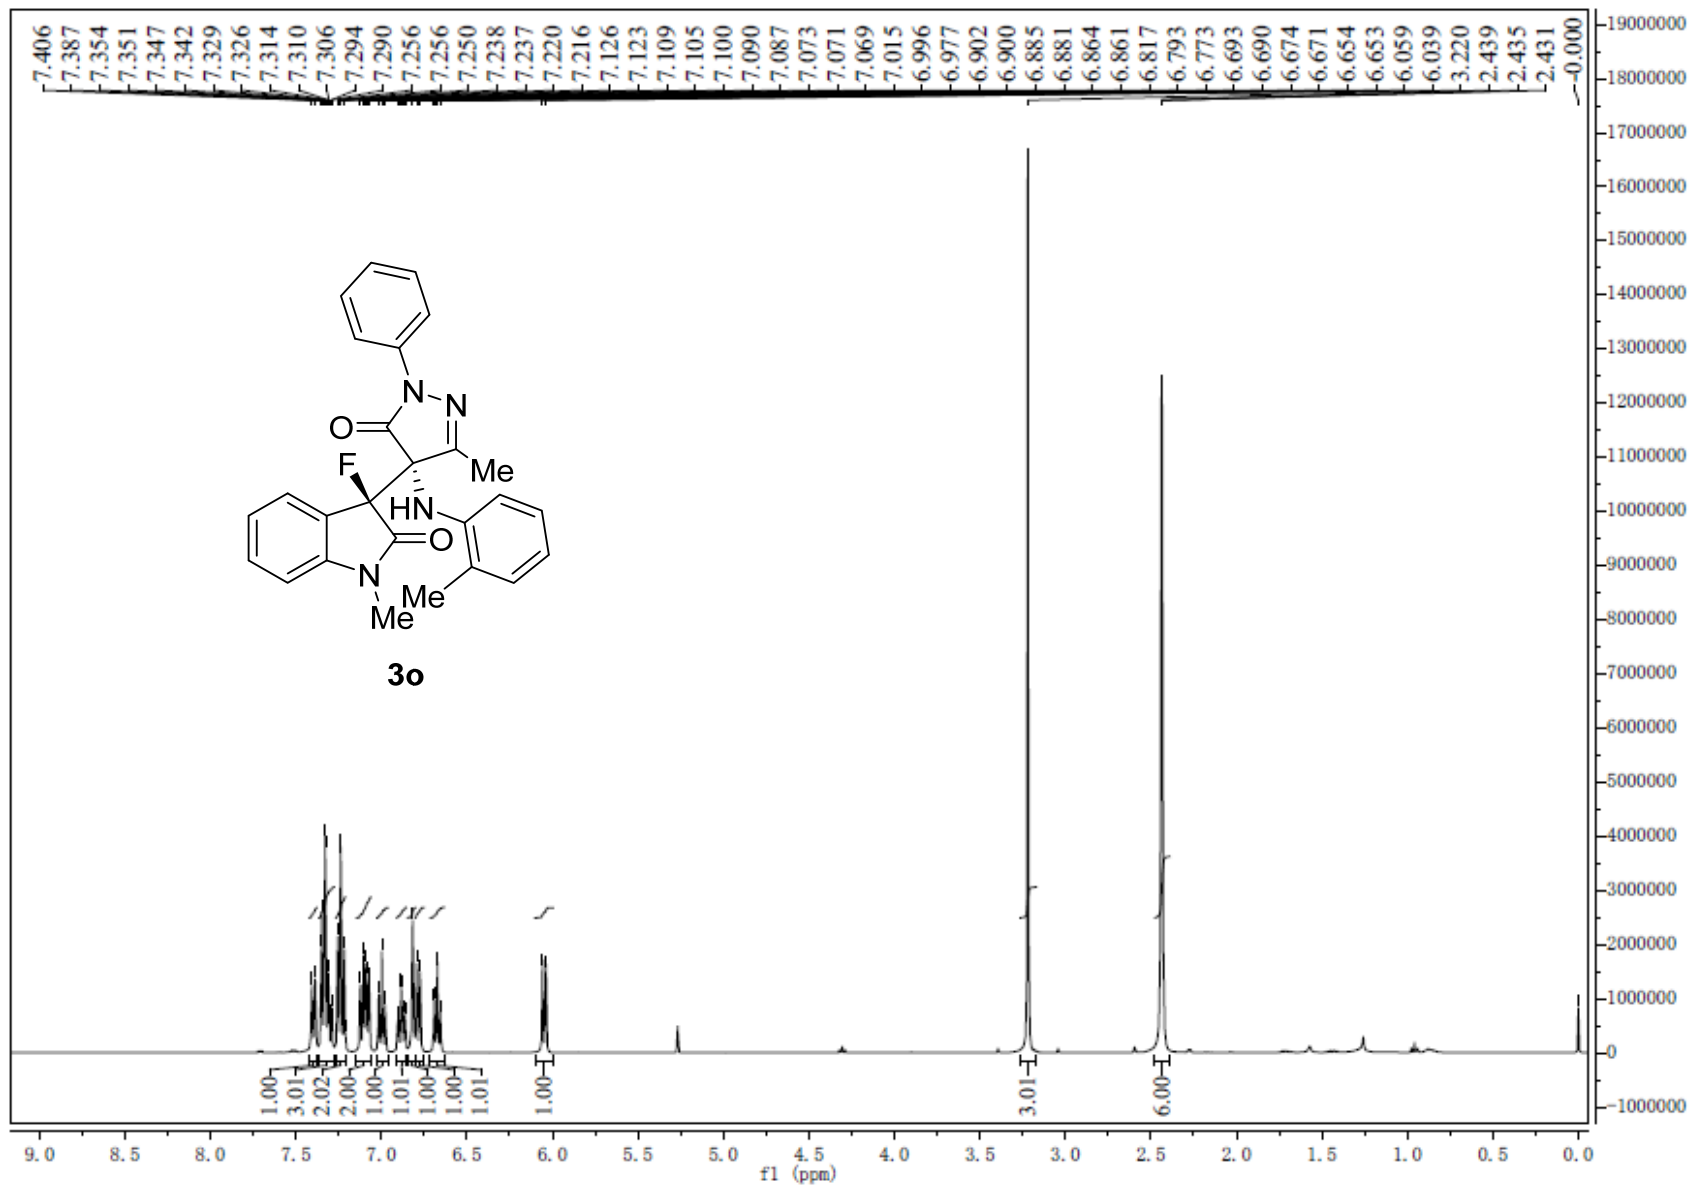

<sup>1</sup>H NMR (400 MHz)

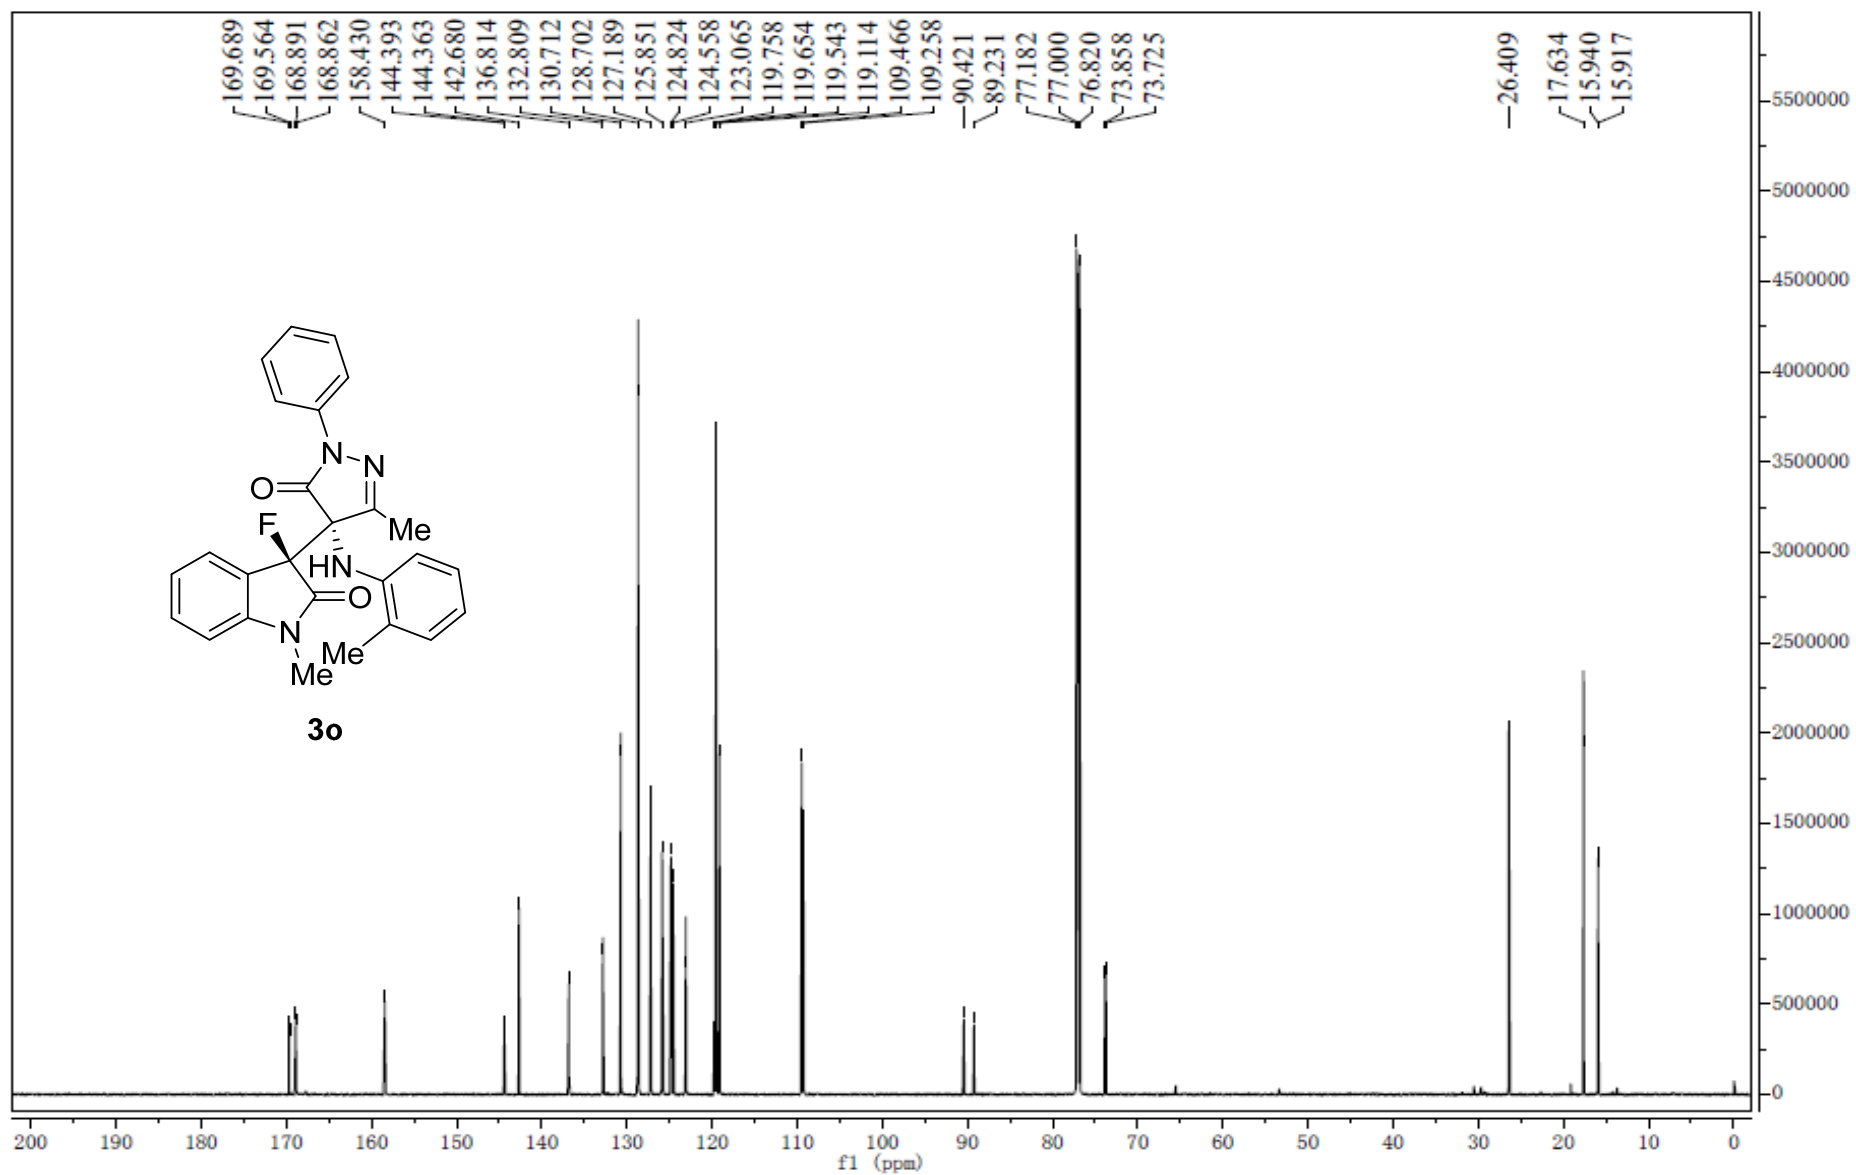

$^{13}\text{C}$  NMR (176 MHz)

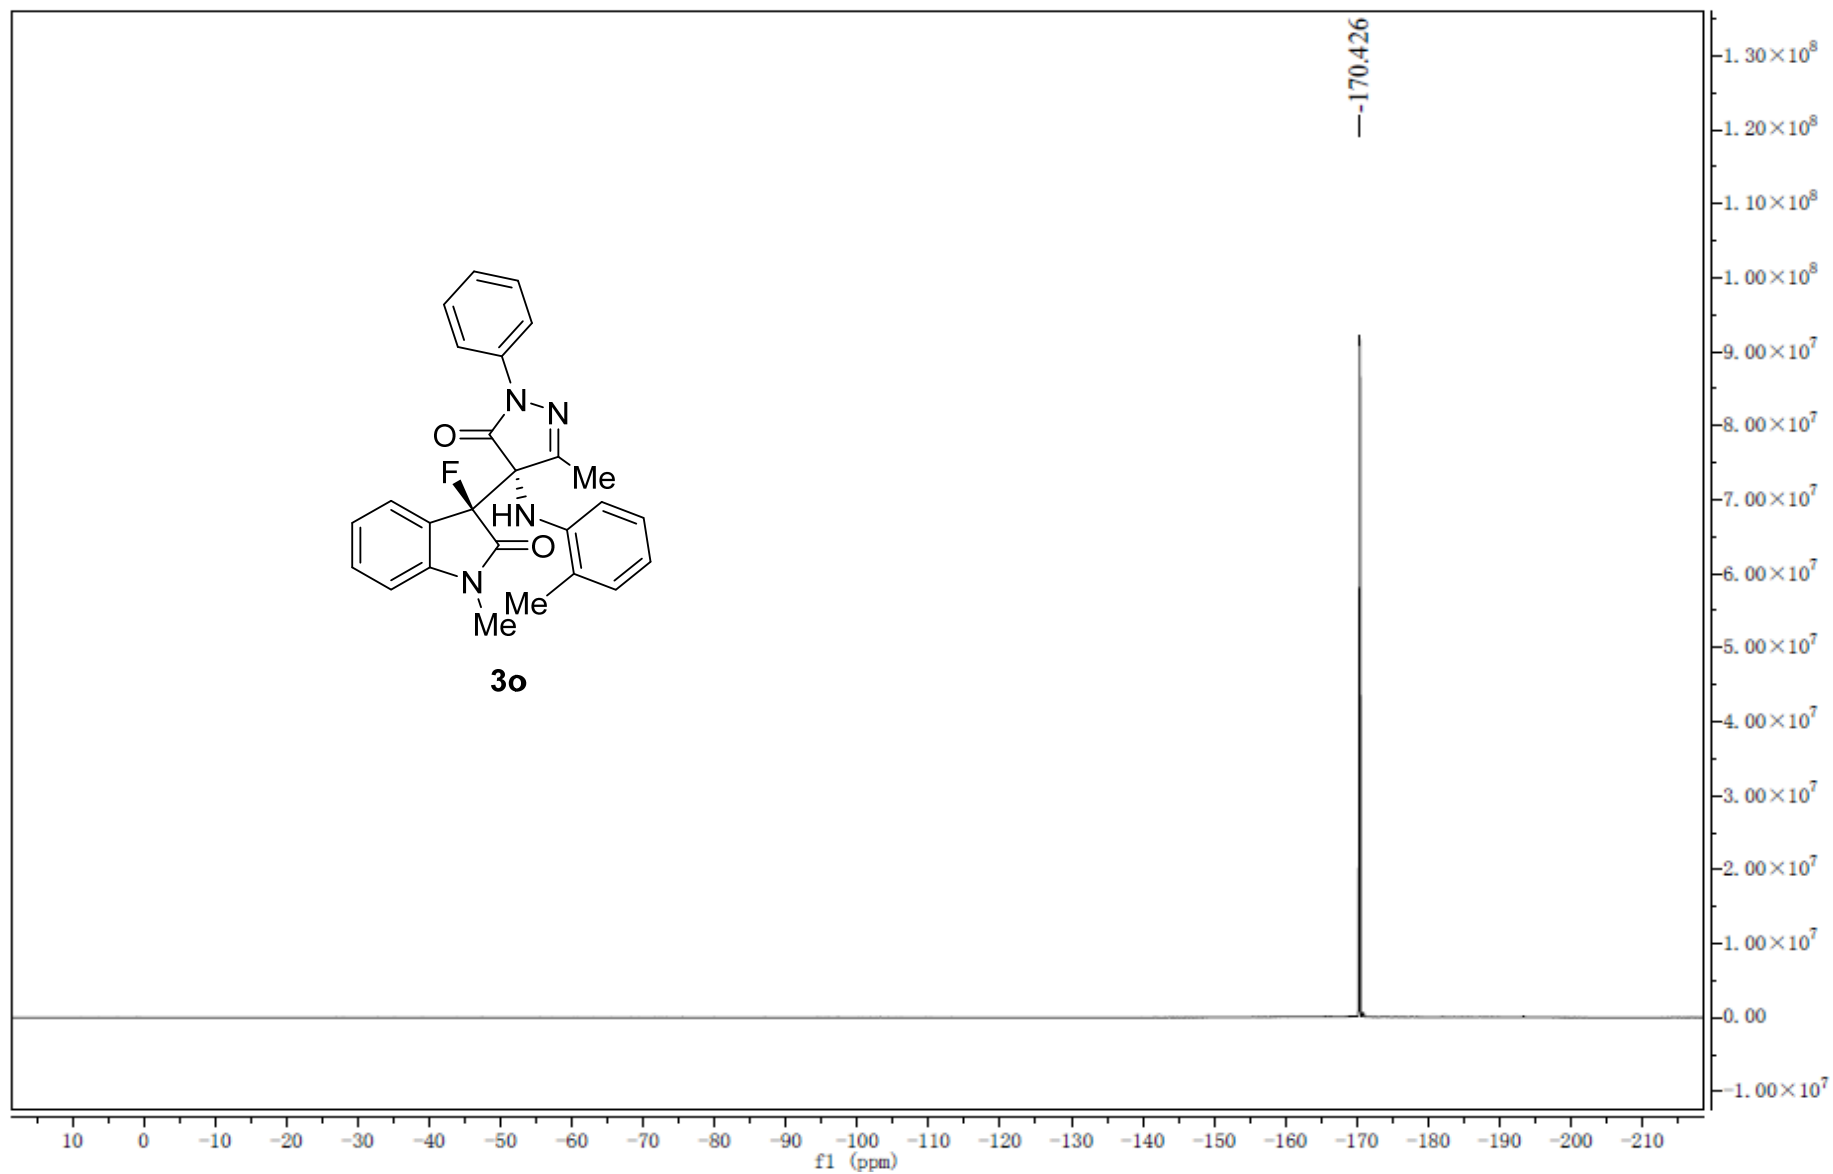

<sup>19</sup>F NMR (376 MHz)

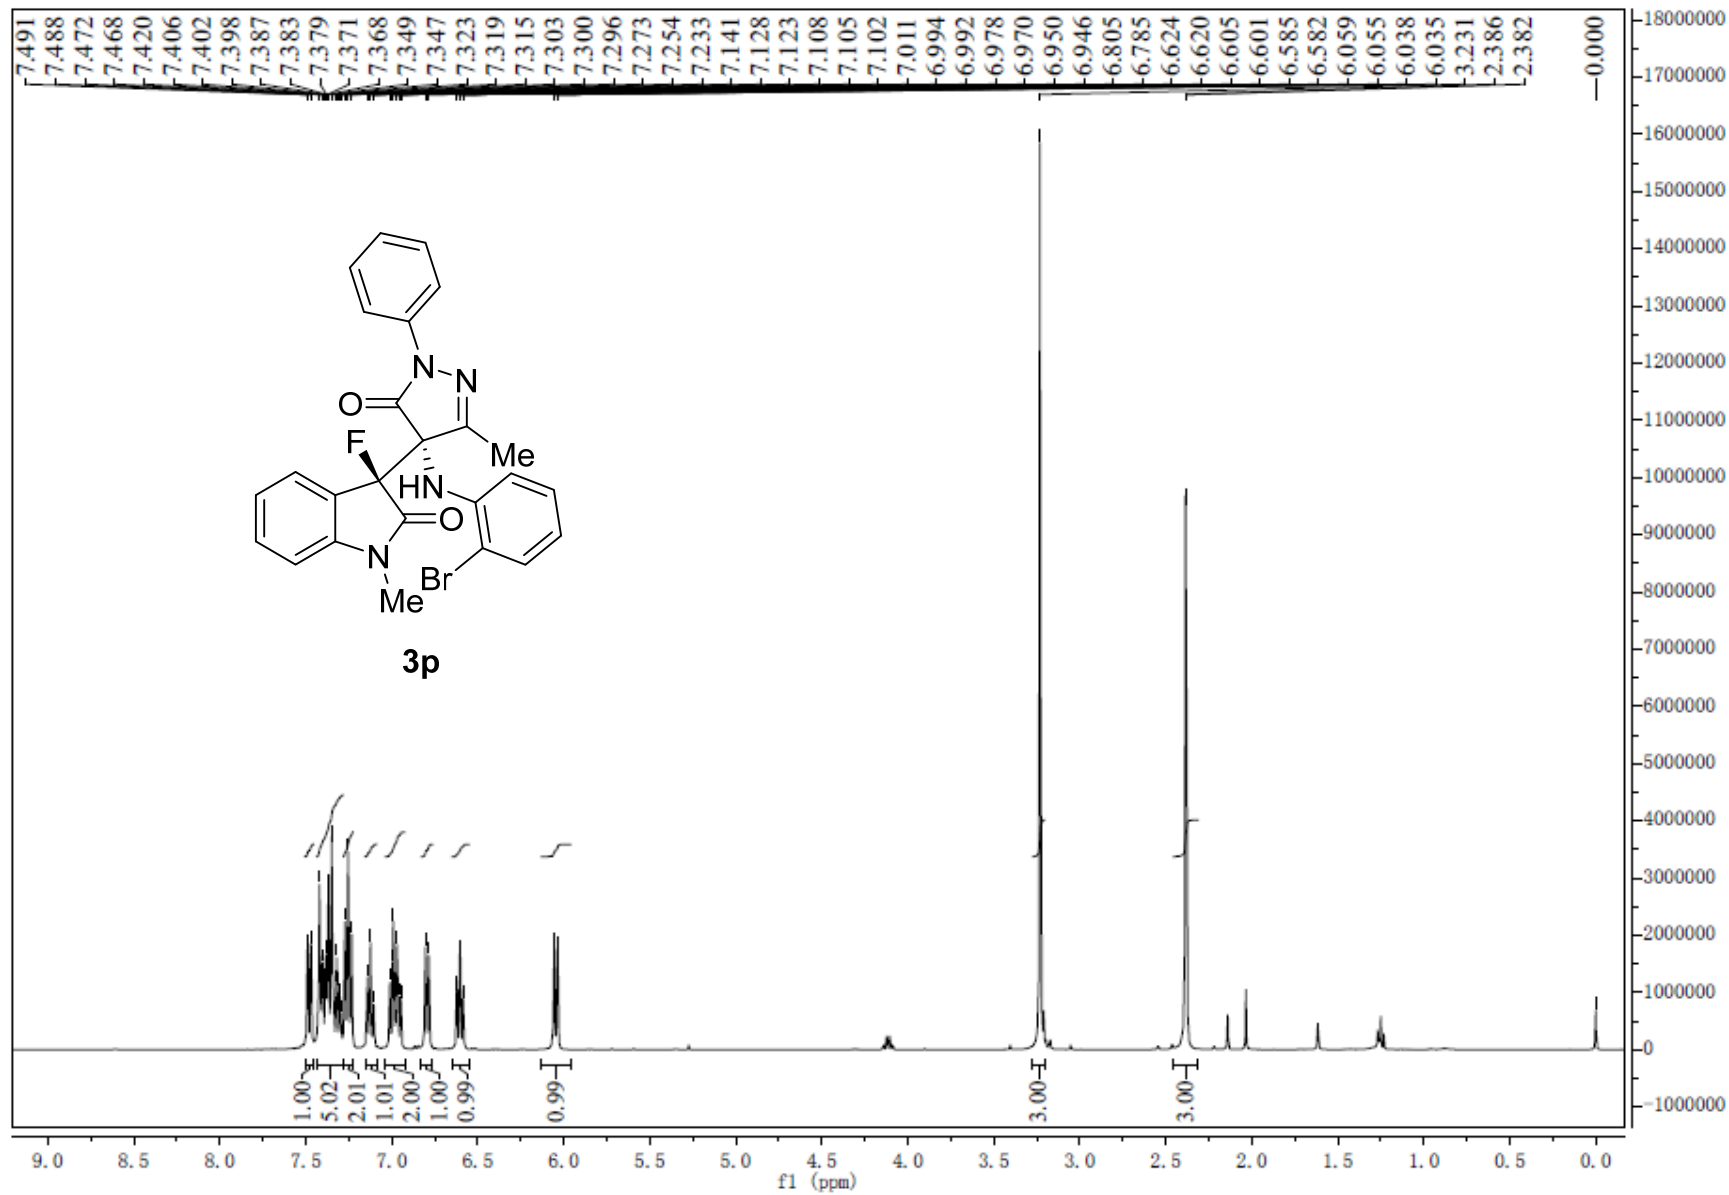

<sup>1</sup>H NMR (400 MHz)

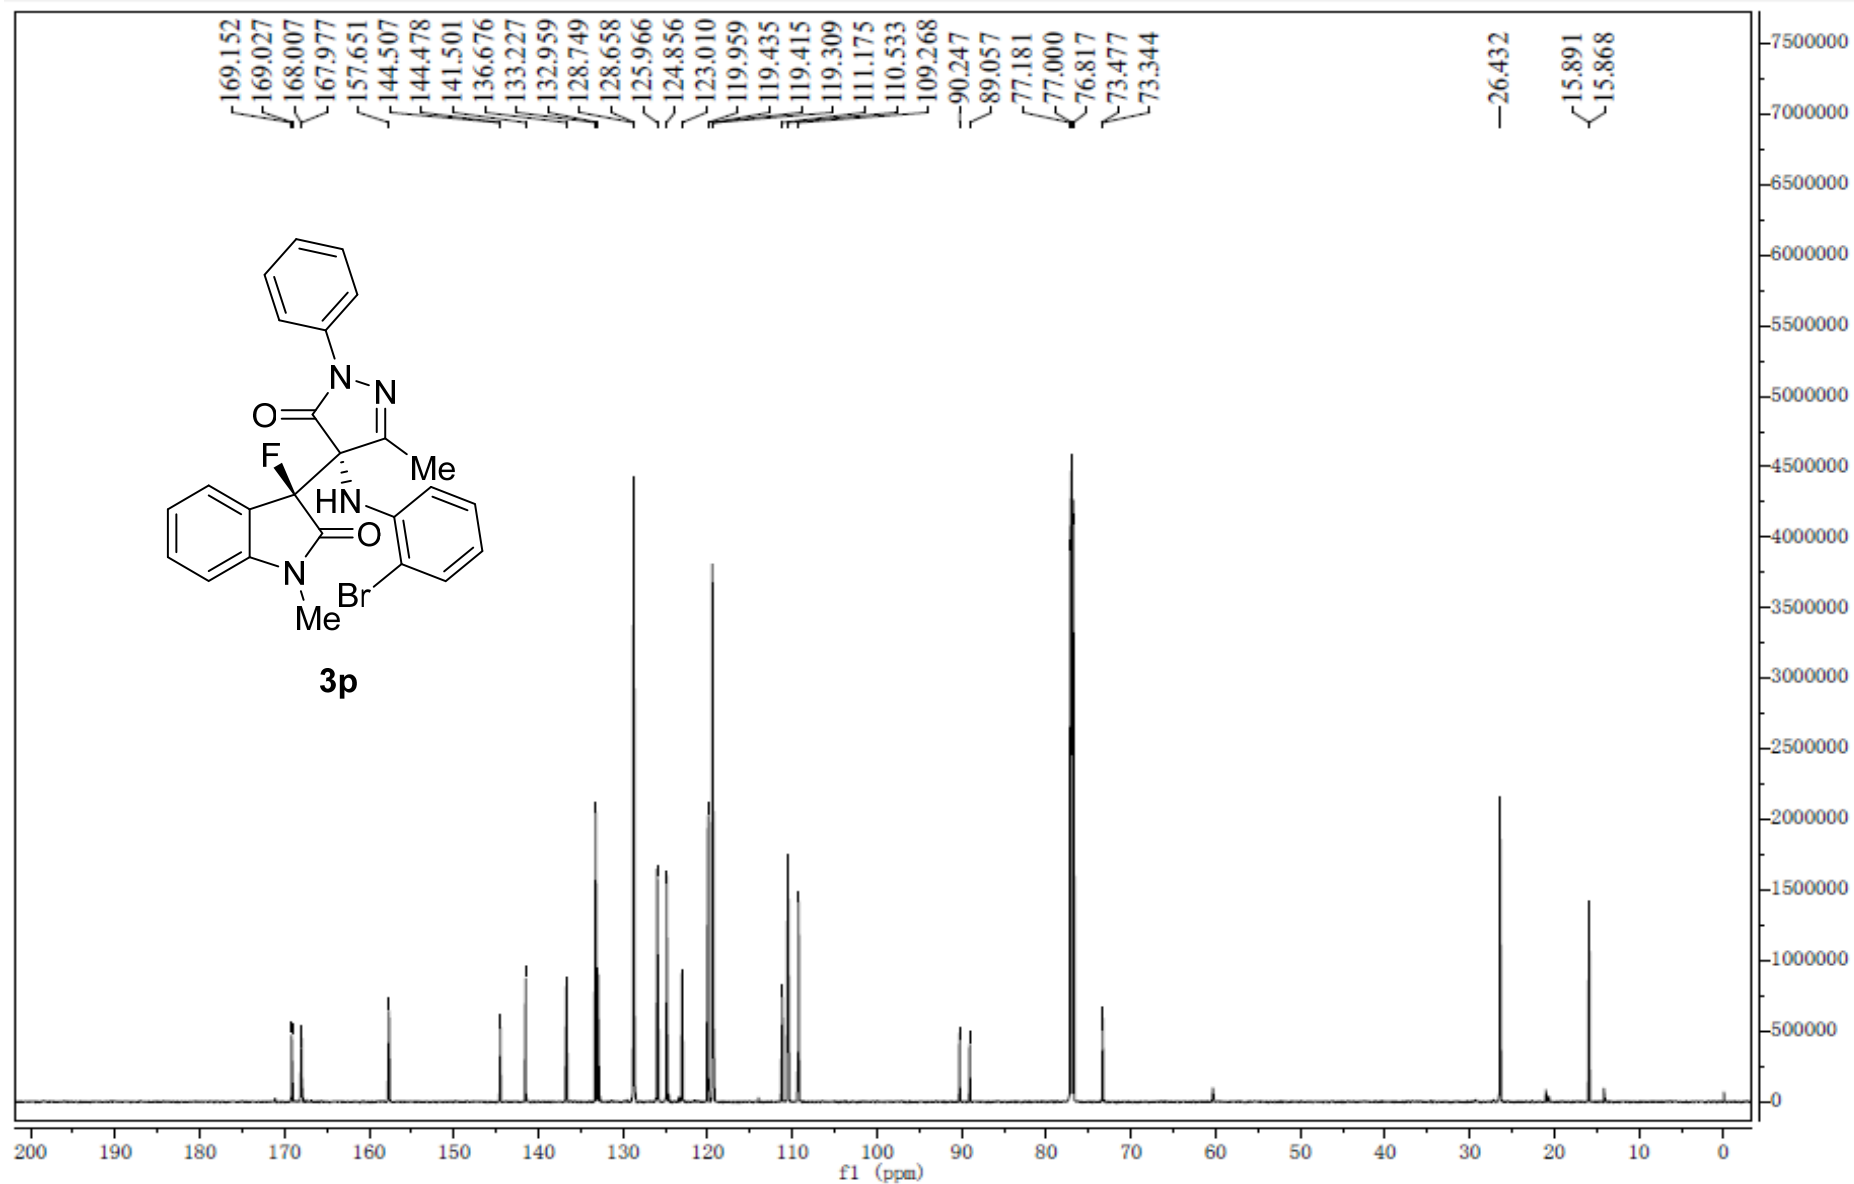

<sup>13</sup>C NMR (176 MHz)

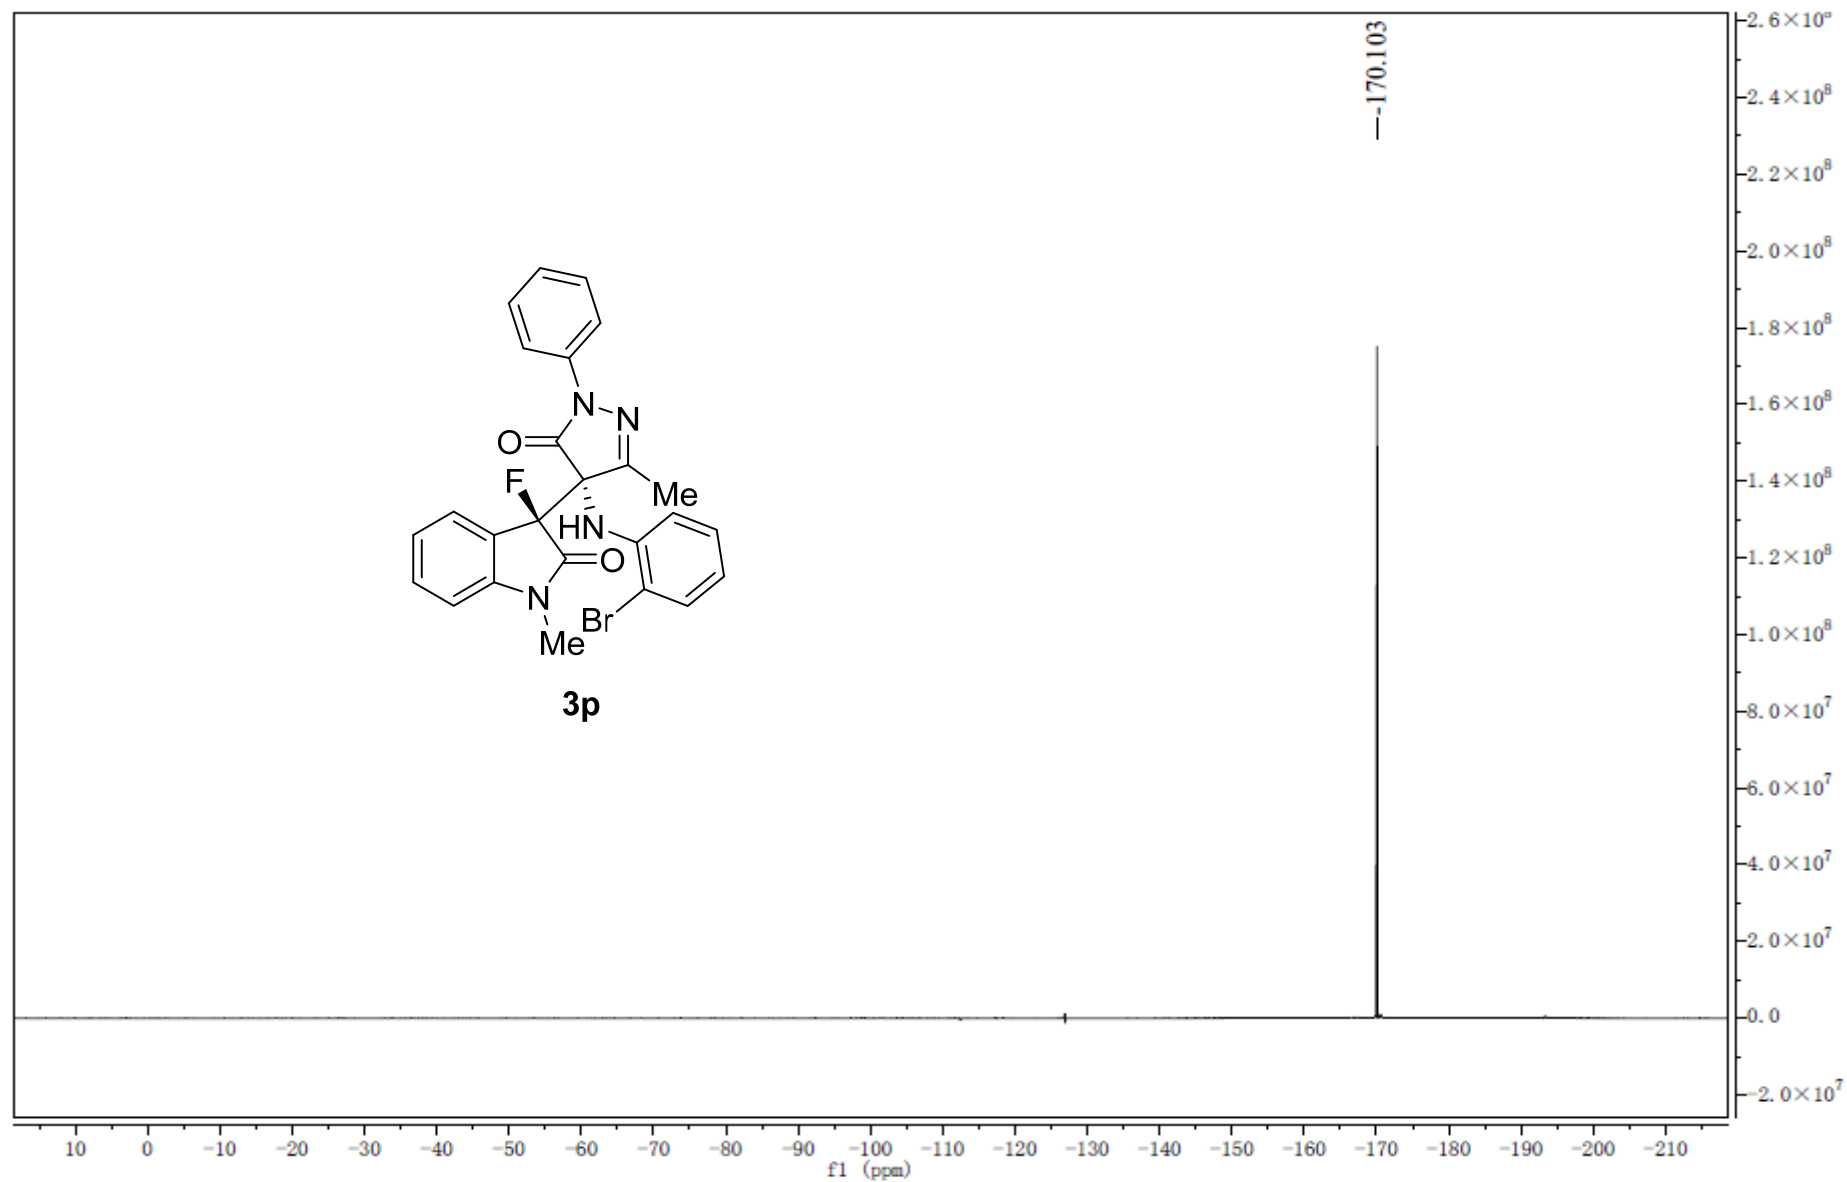

$^{19}\text{F}$  NMR (376 MHz)



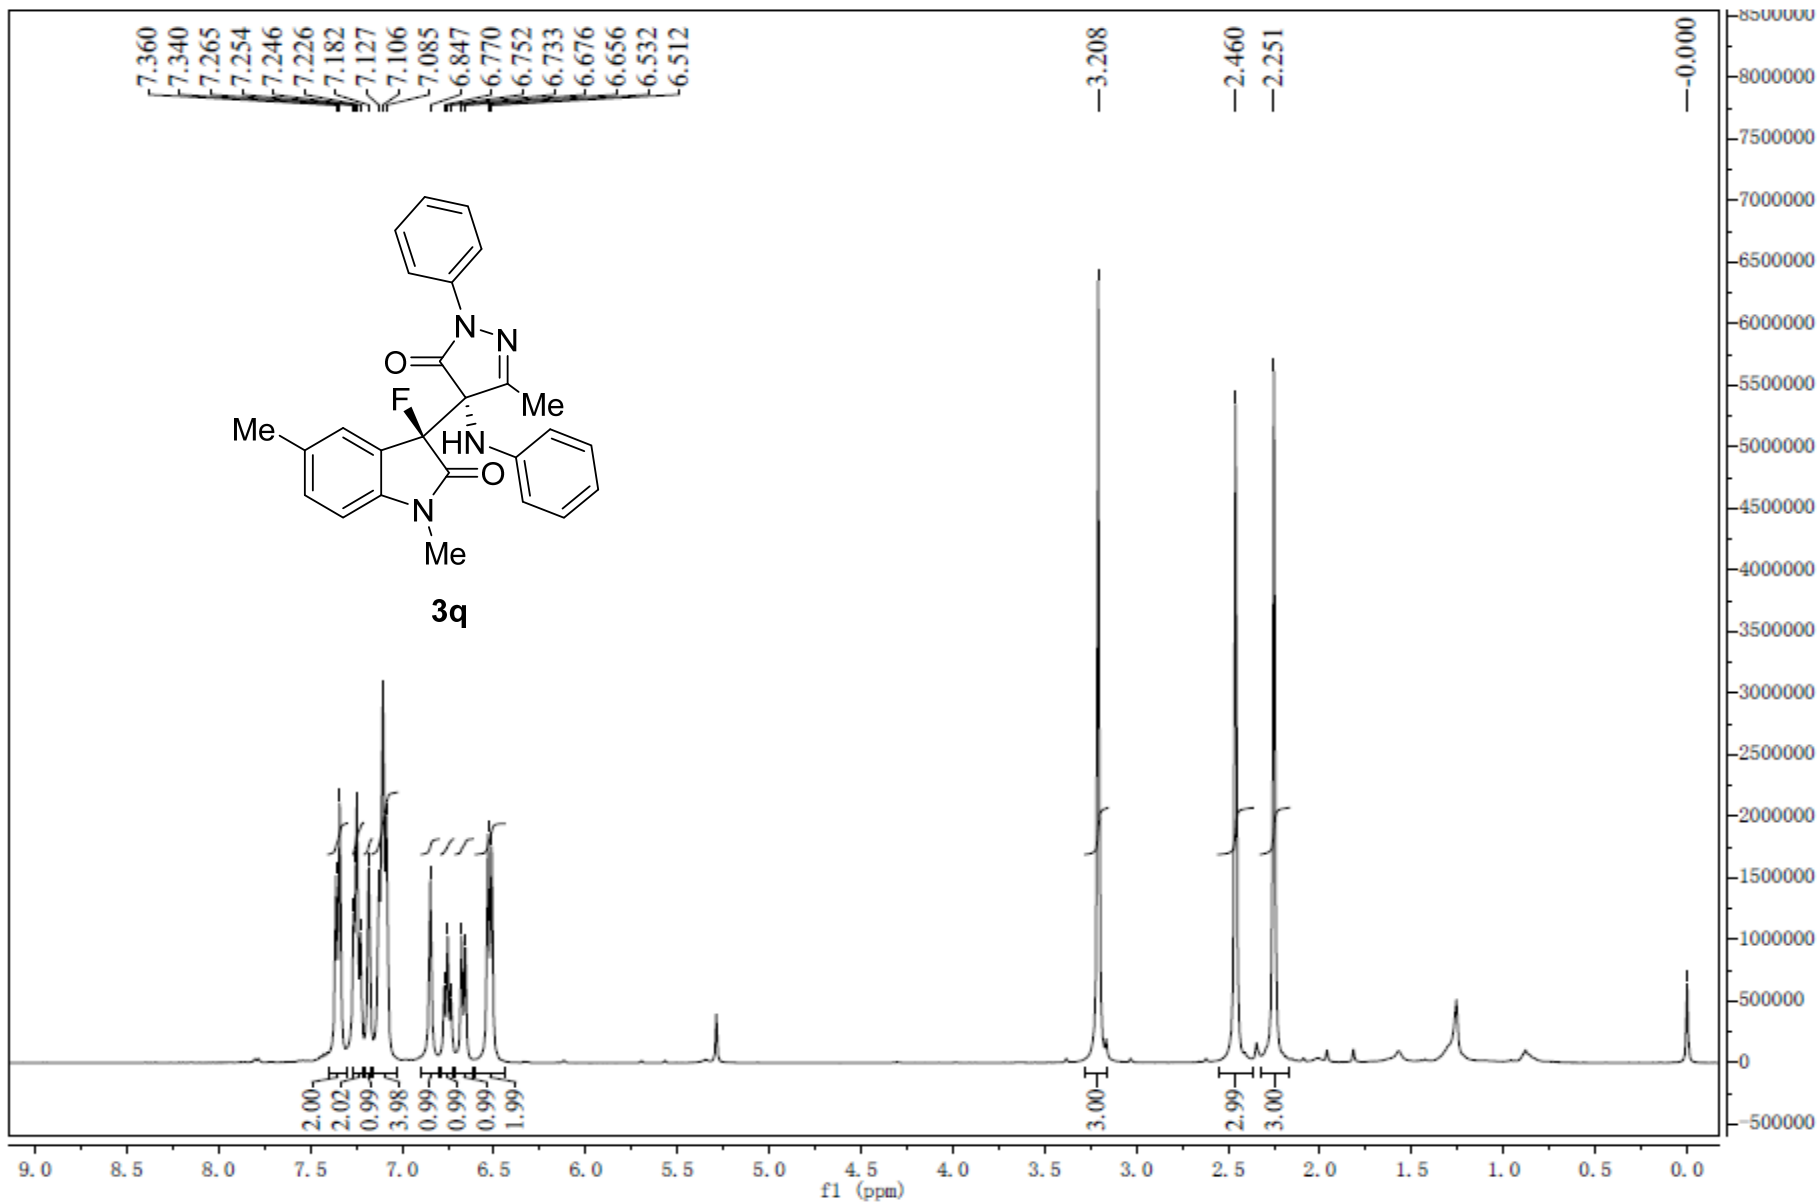

<sup>1</sup>H NMR (400 MHz)

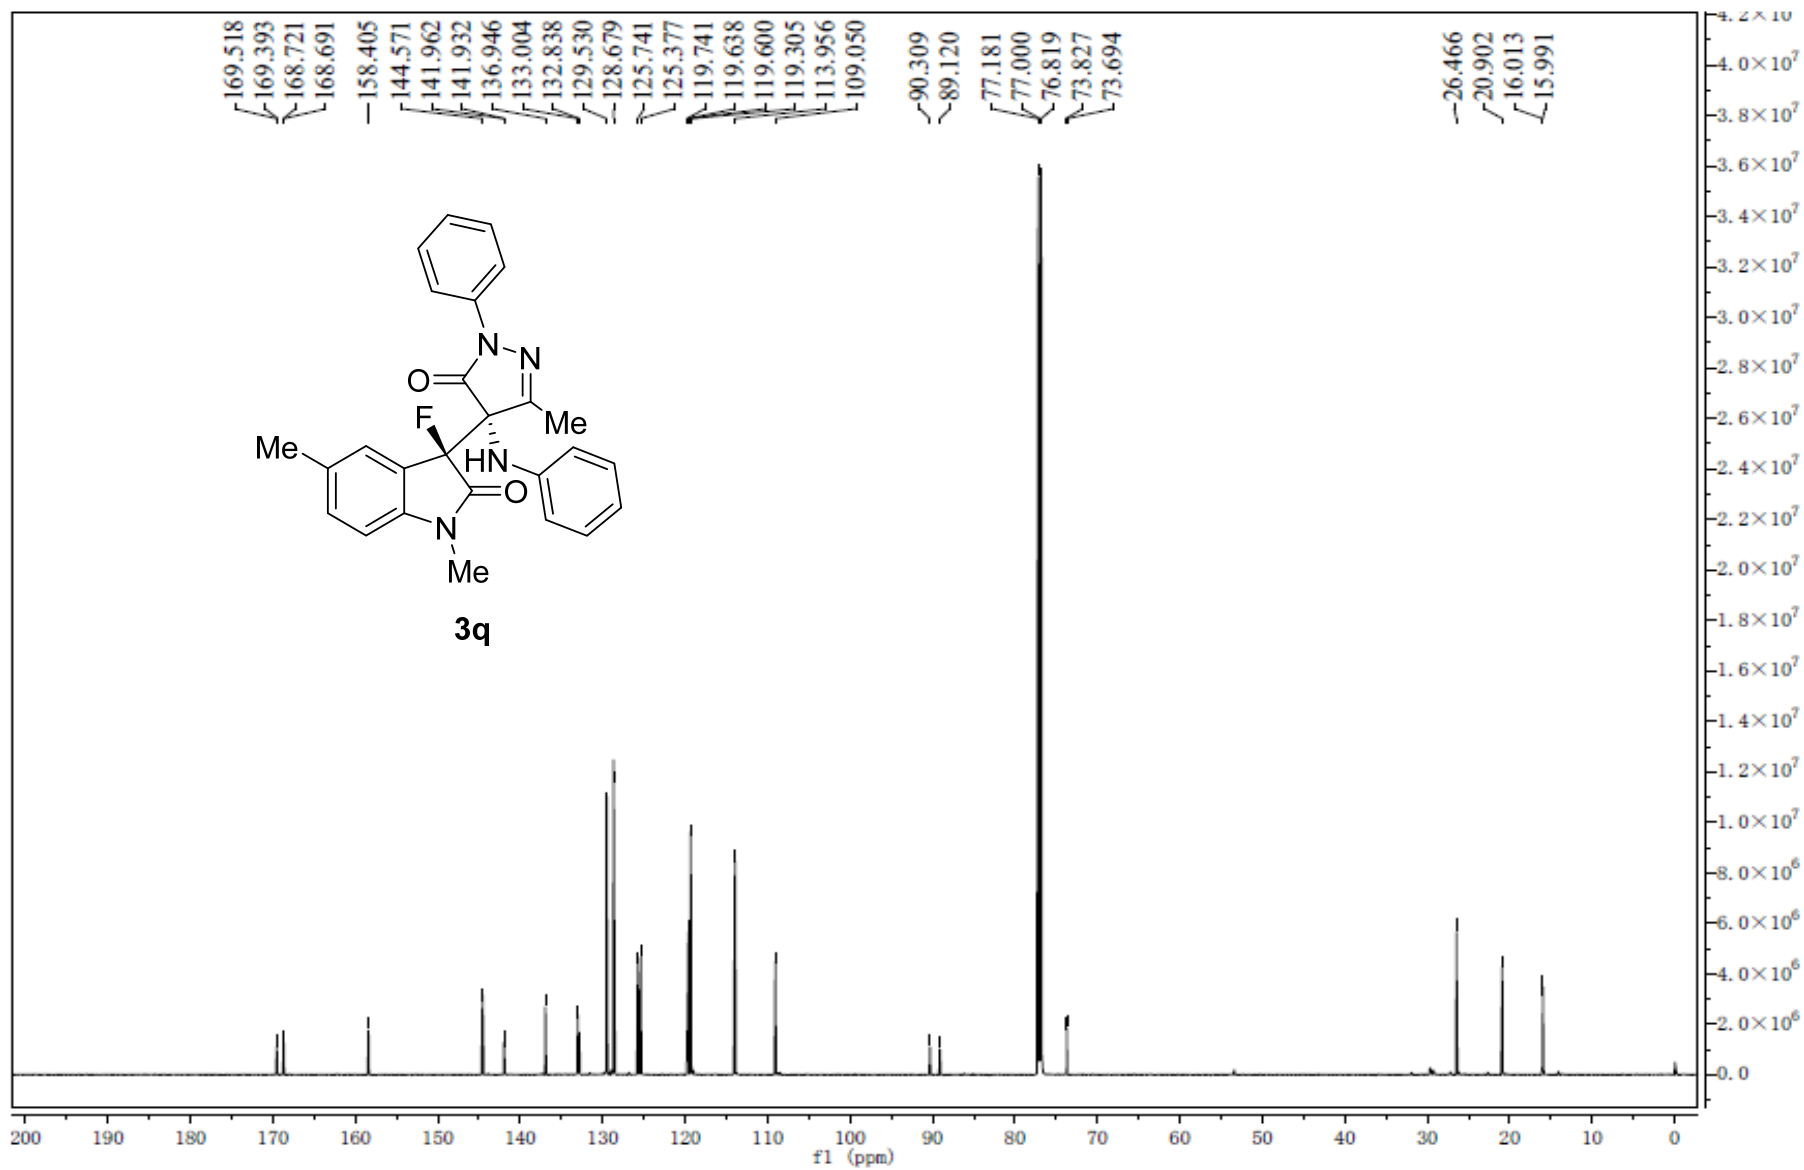

<sup>13</sup>C NMR (176 MHz)

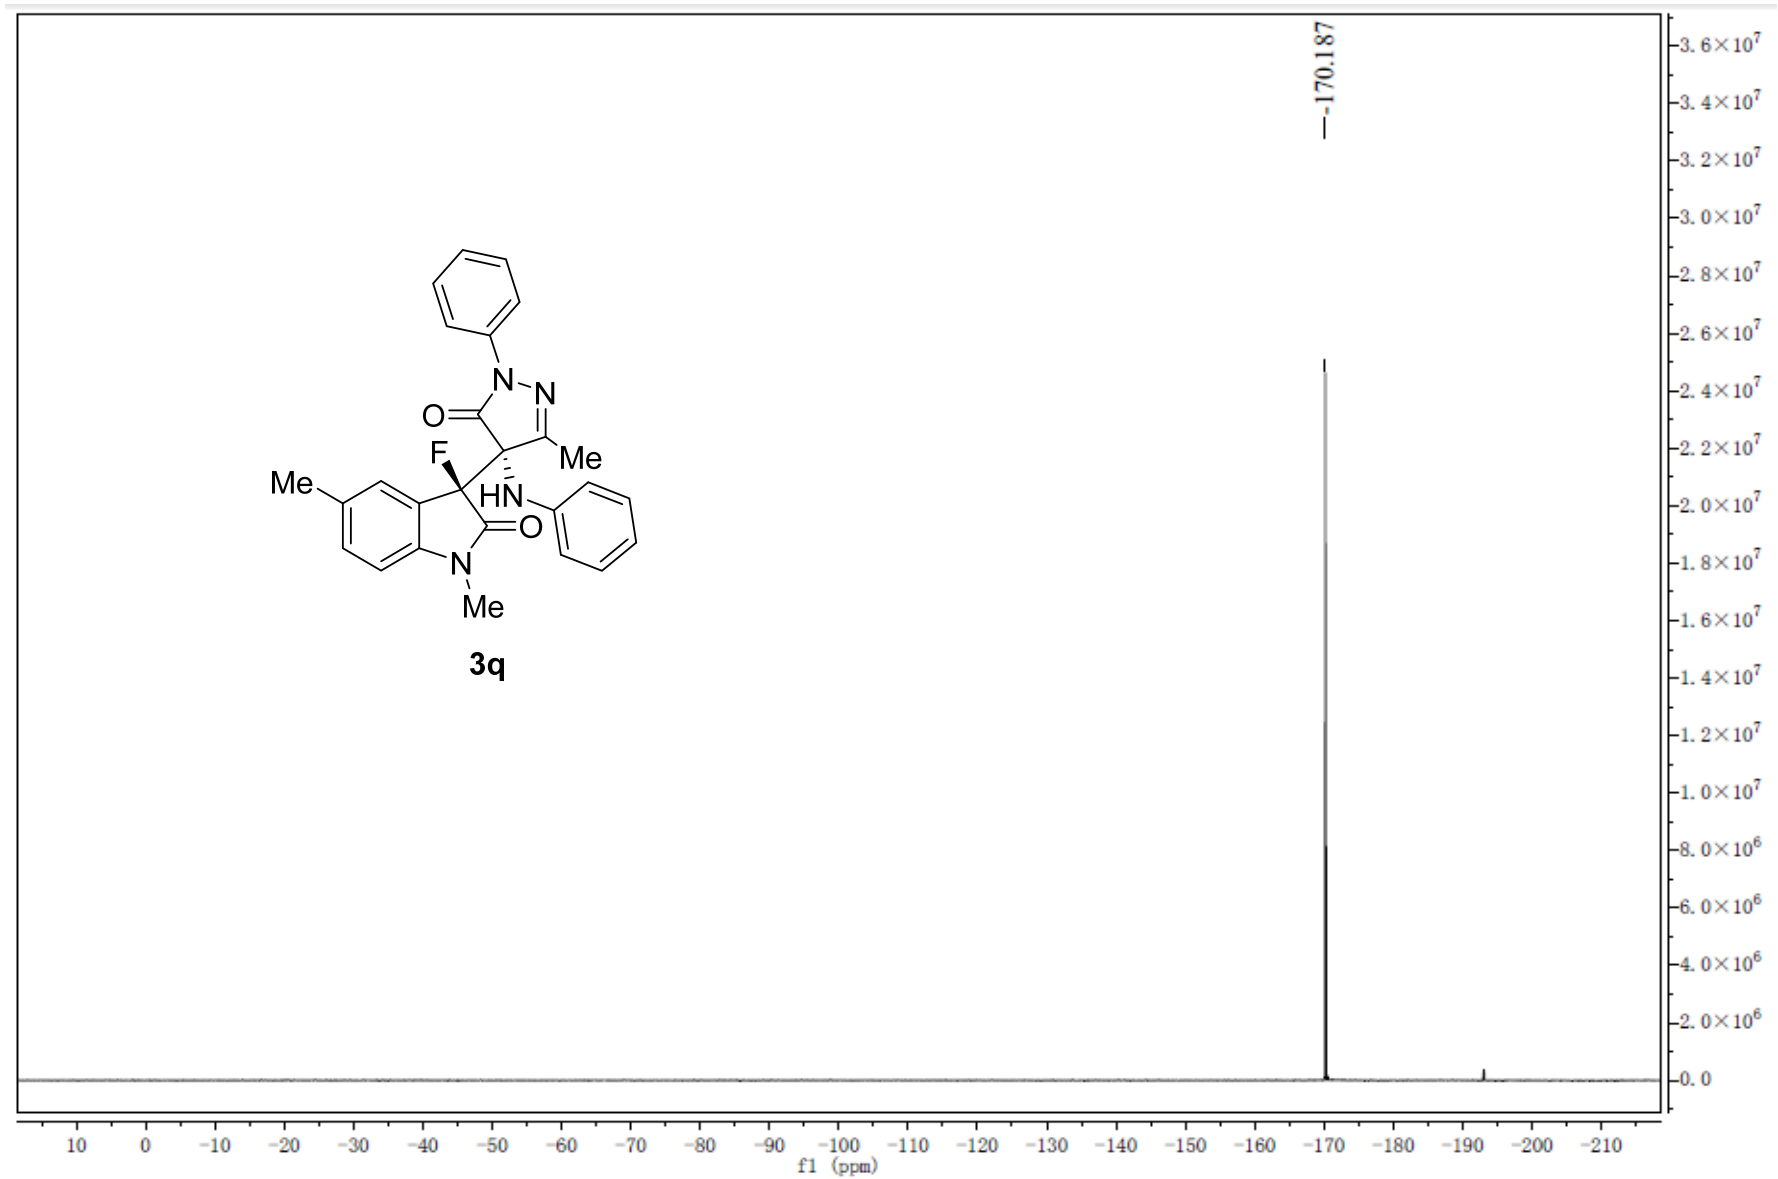

$^{19}\text{F}$  NMR (376 MHz)

S50

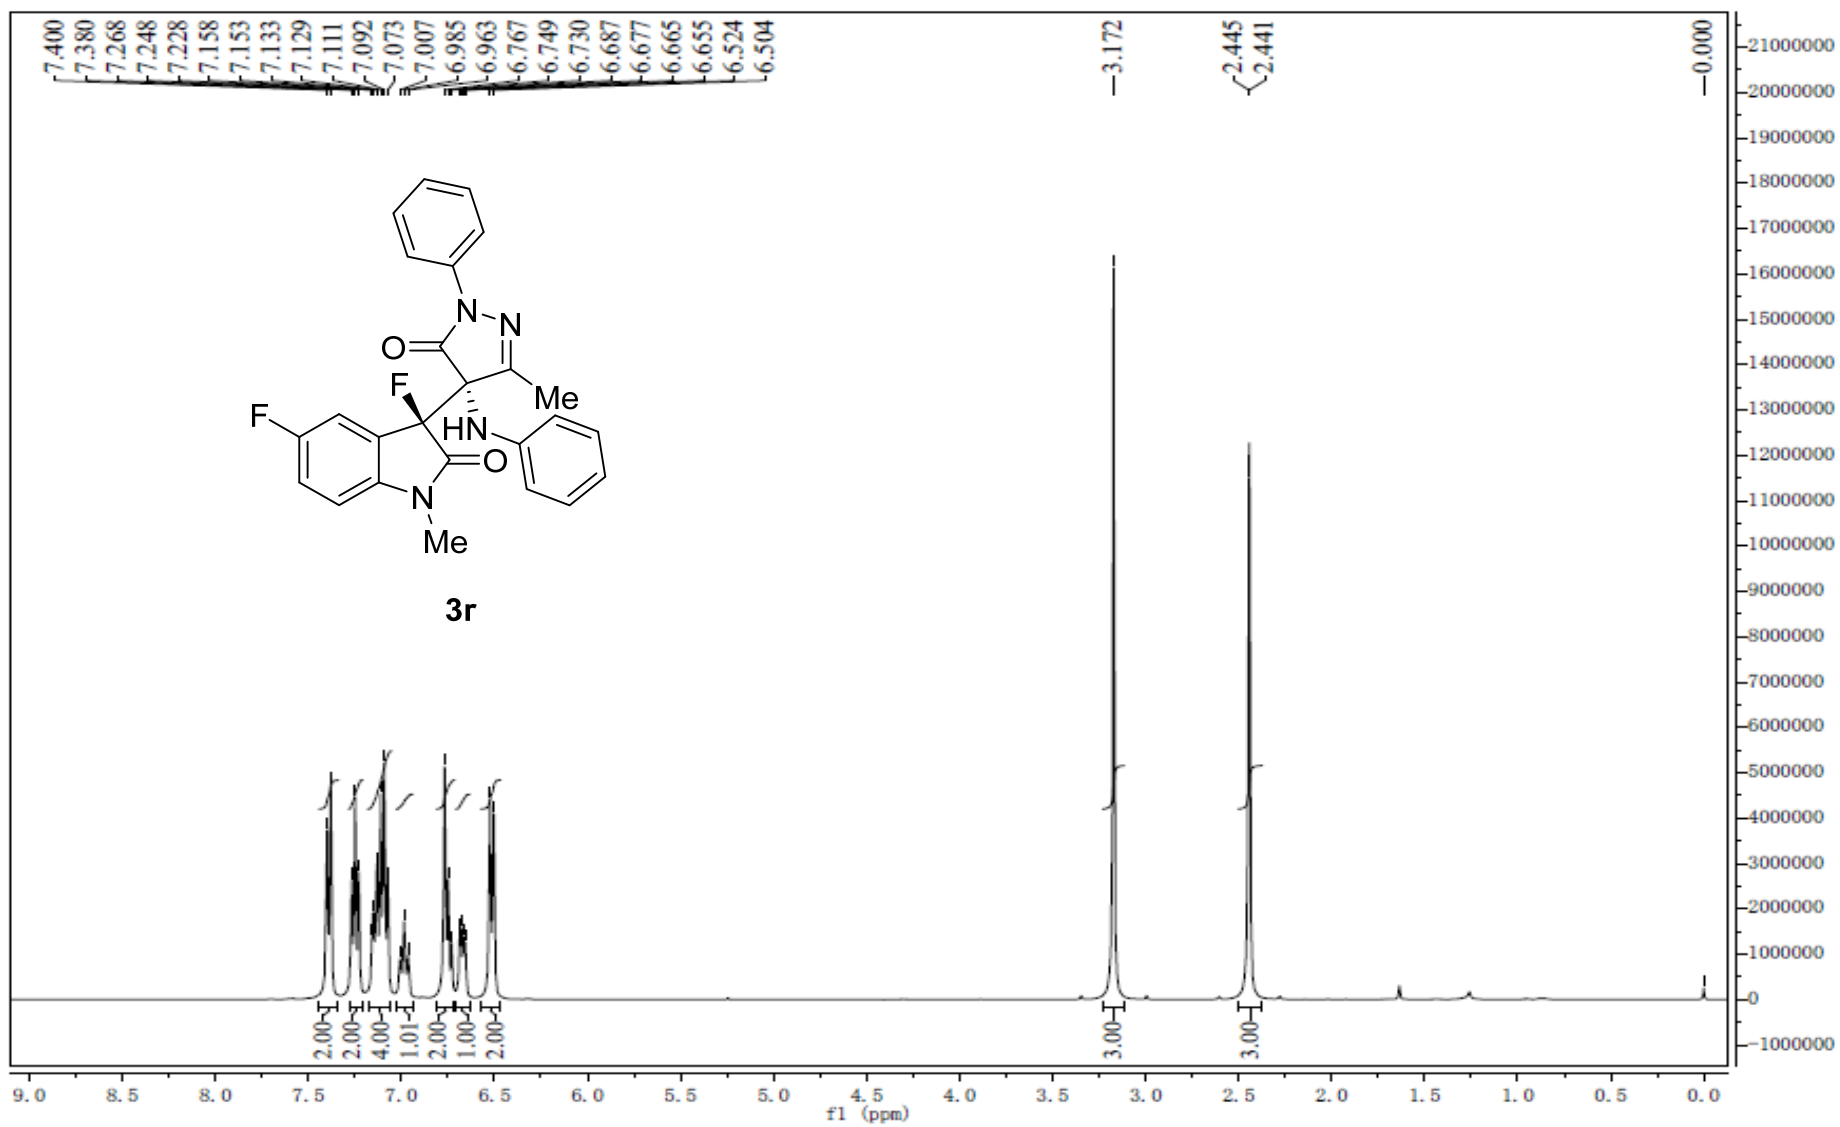

<sup>1</sup>H NMR (400 MHz)

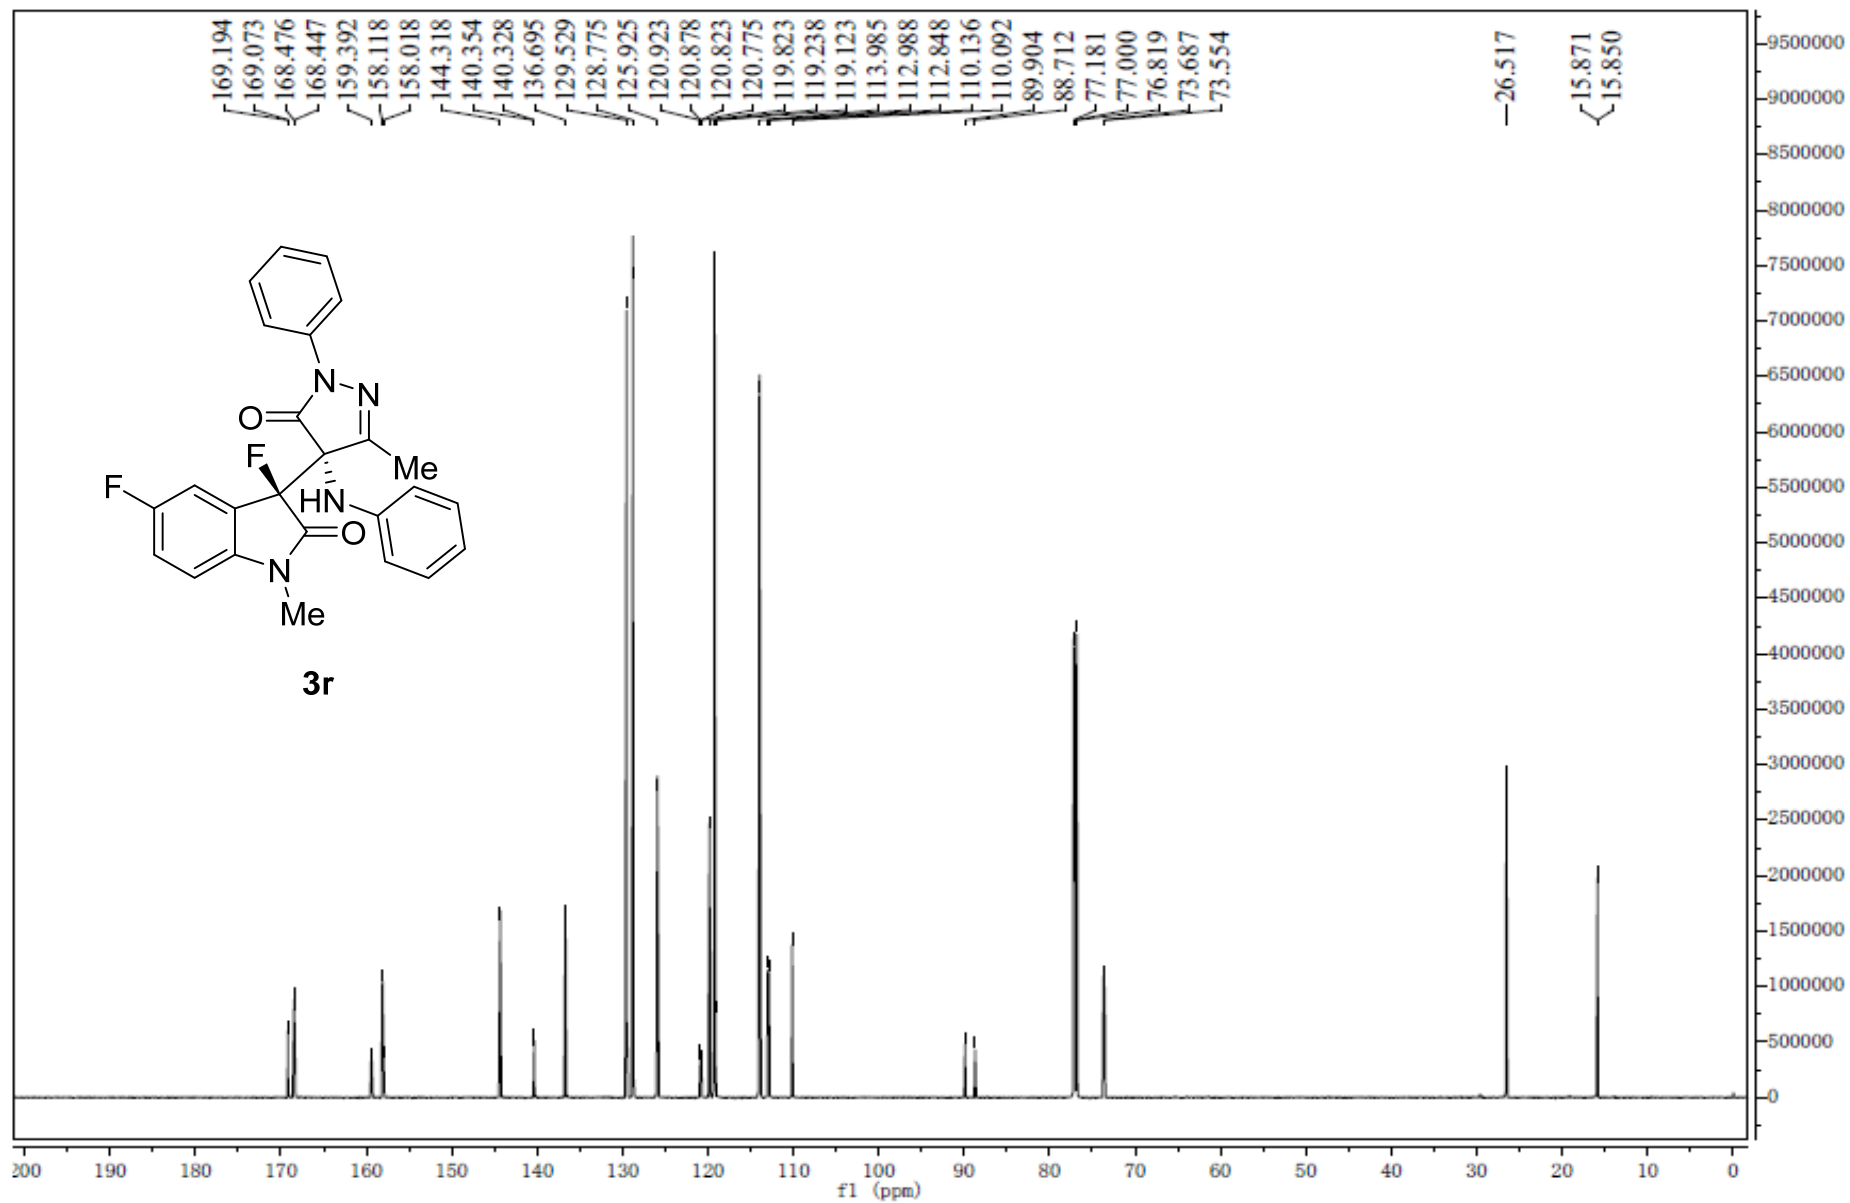

<sup>13</sup>C NMR (176 MHz)

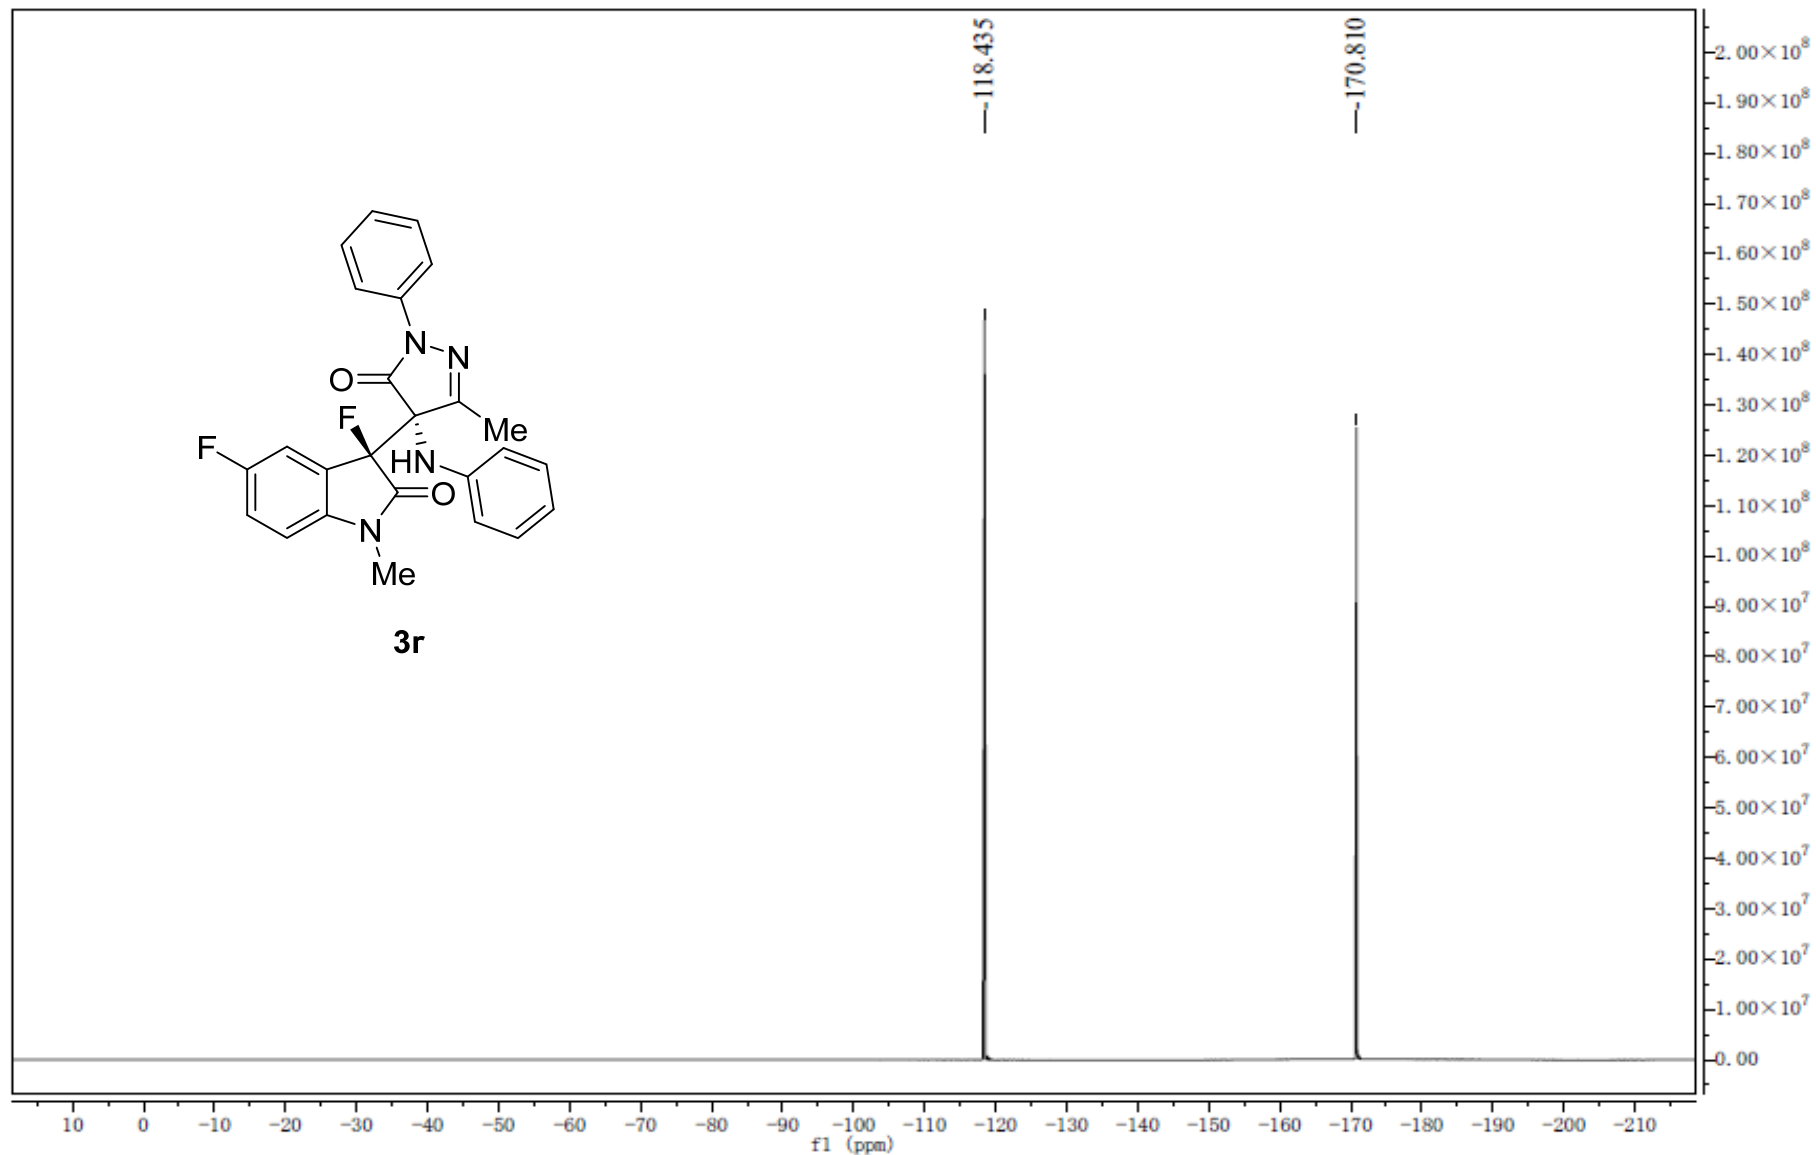

$^{19}\text{F}$  NMR (376 MHz)

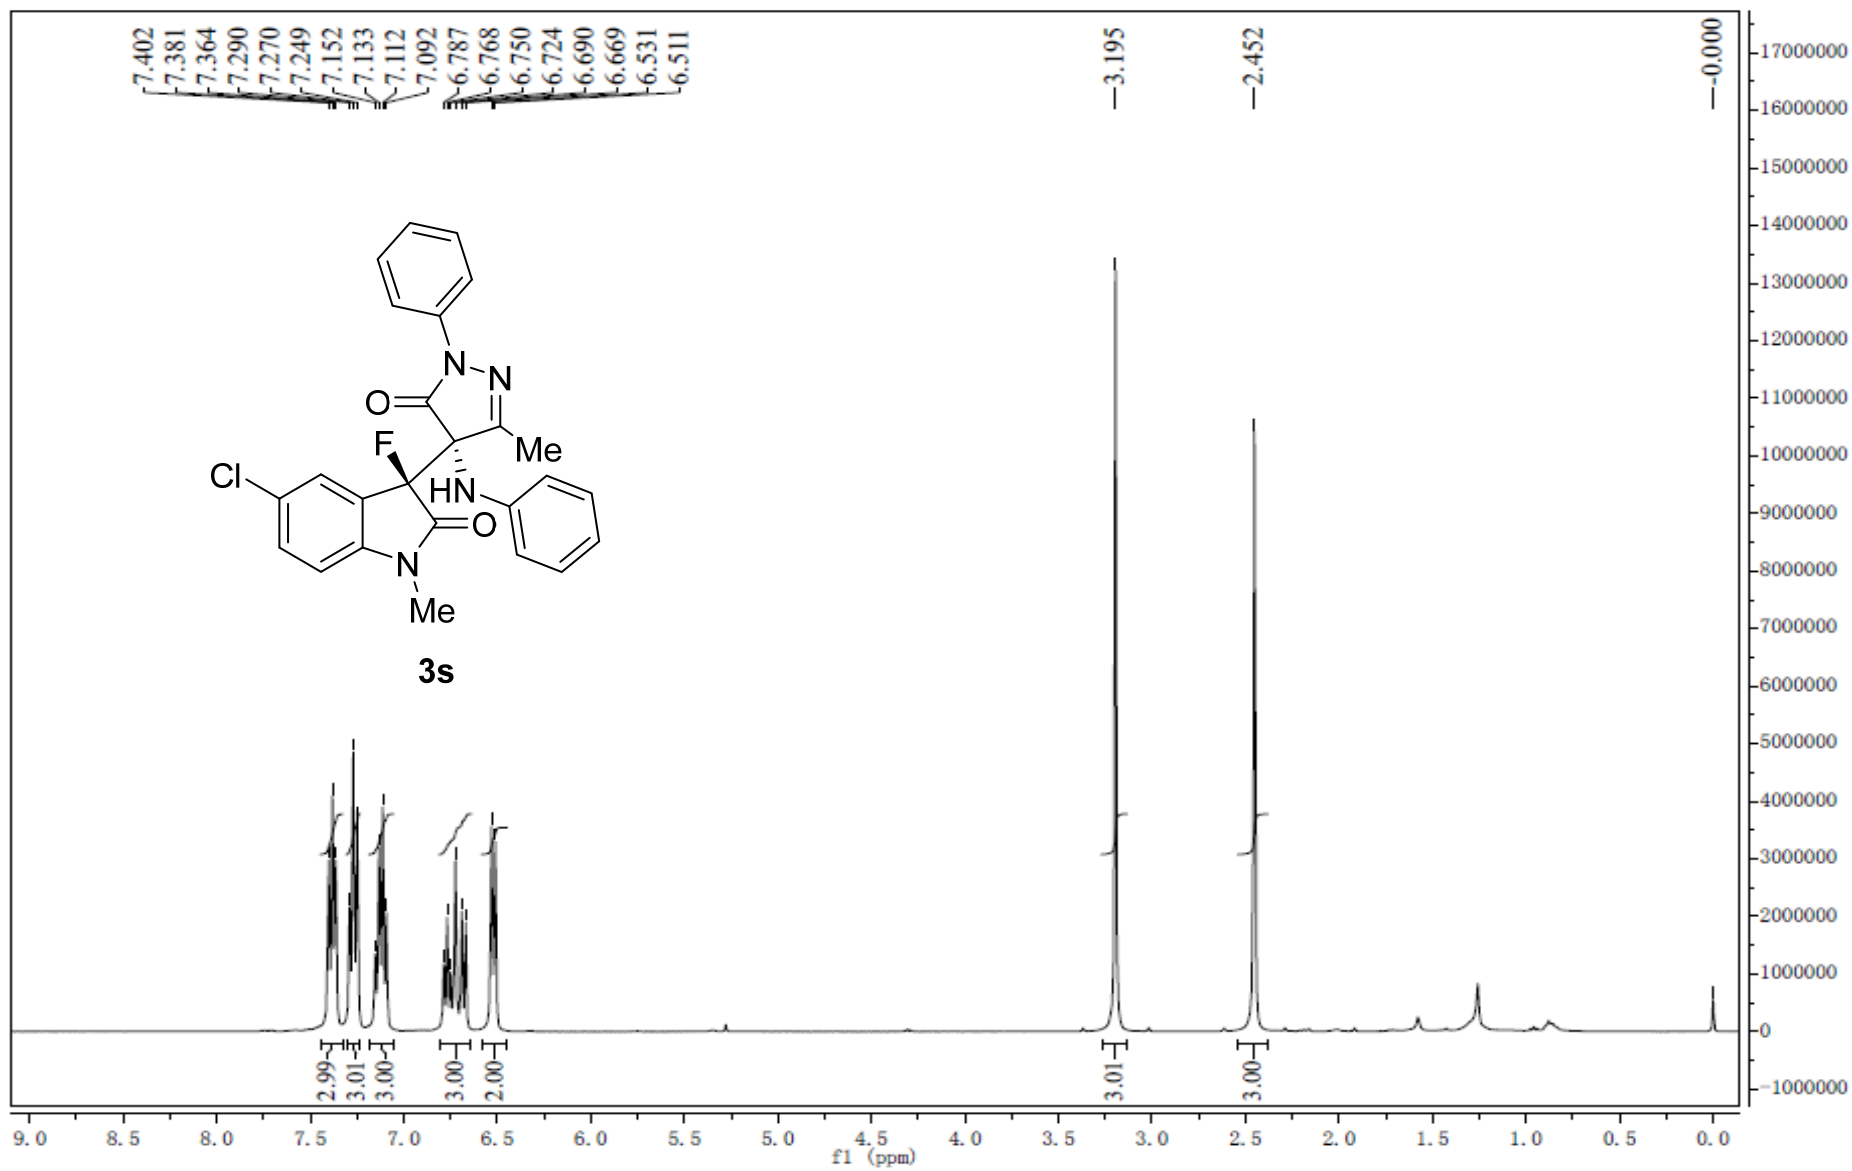

<sup>1</sup>H NMR (400 MHz)

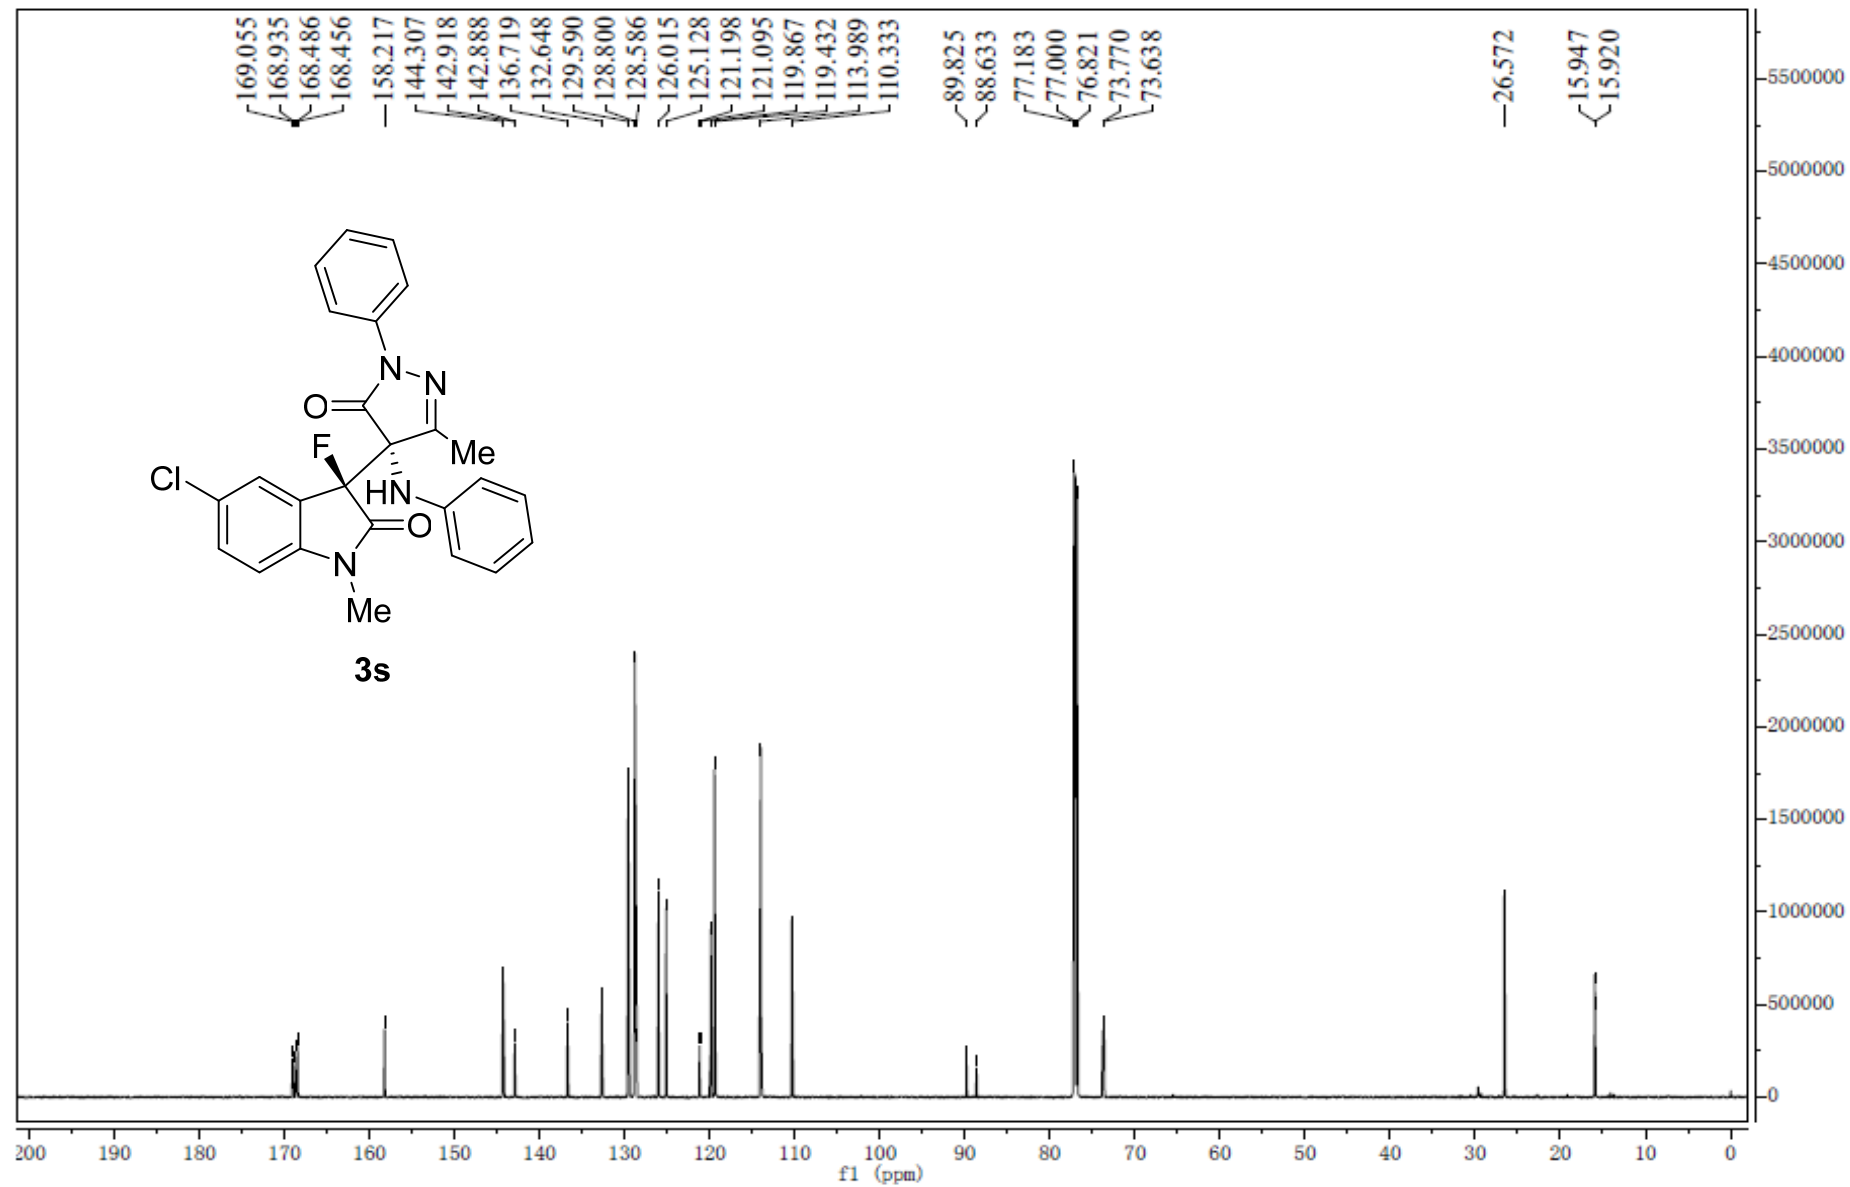

$^{13}\text{C}$  NMR (176 MHz)



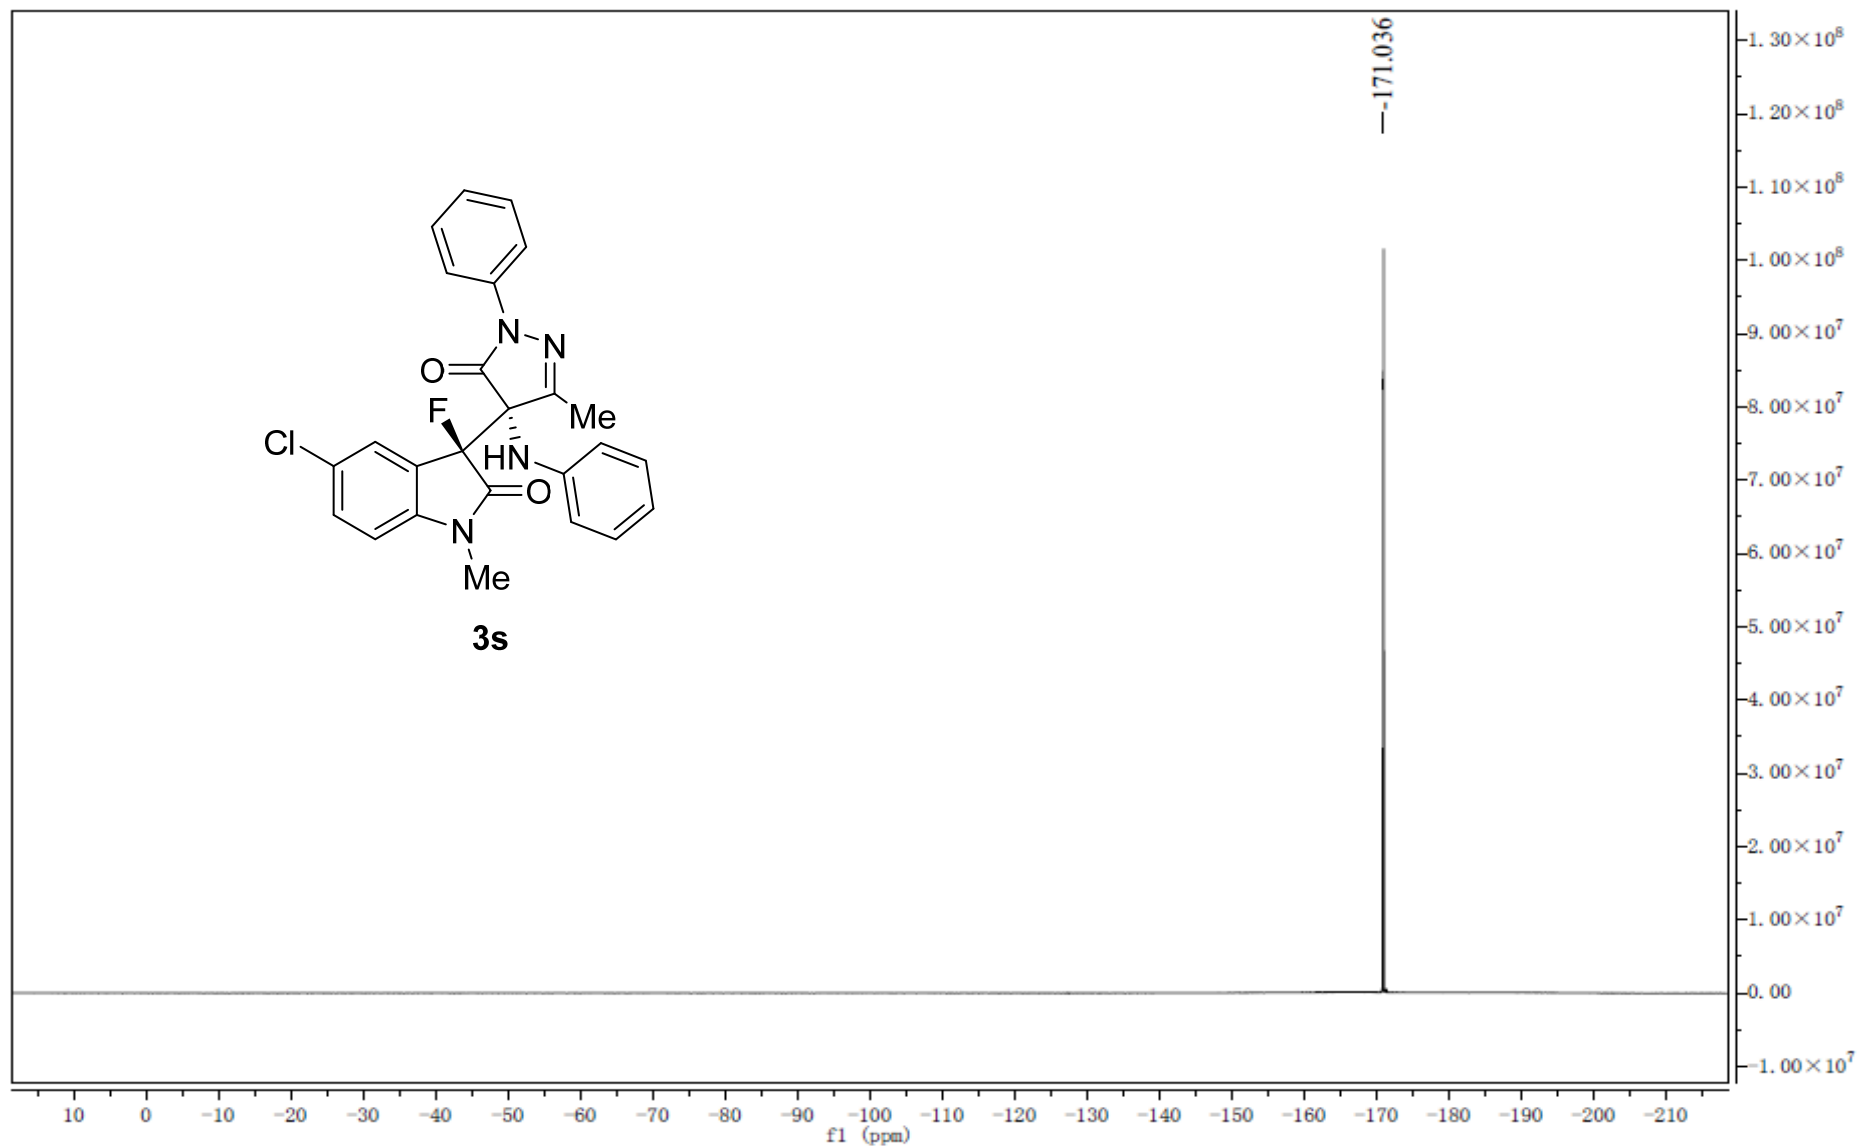

$^{19}\text{F}$  NMR (376 MHz)

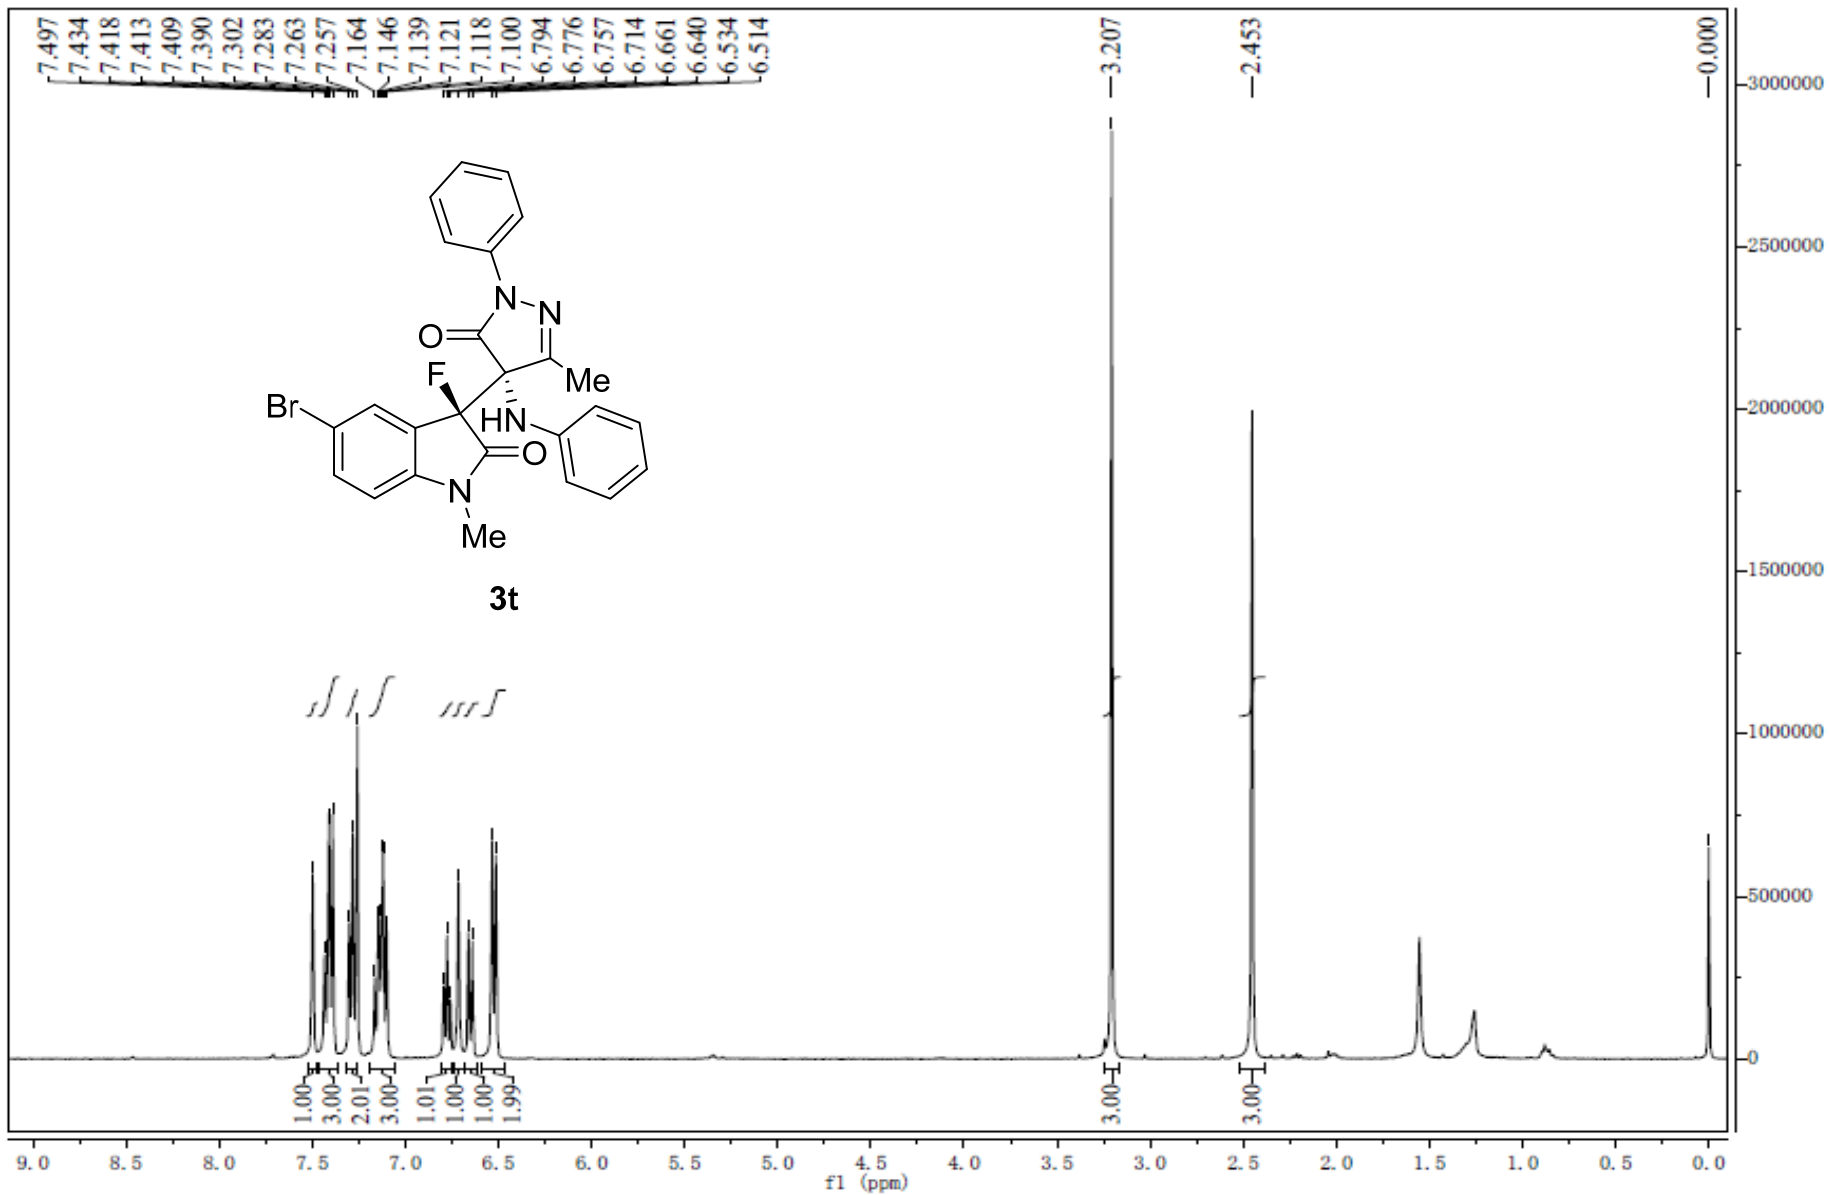

<sup>1</sup>H NMR (400 MHz)

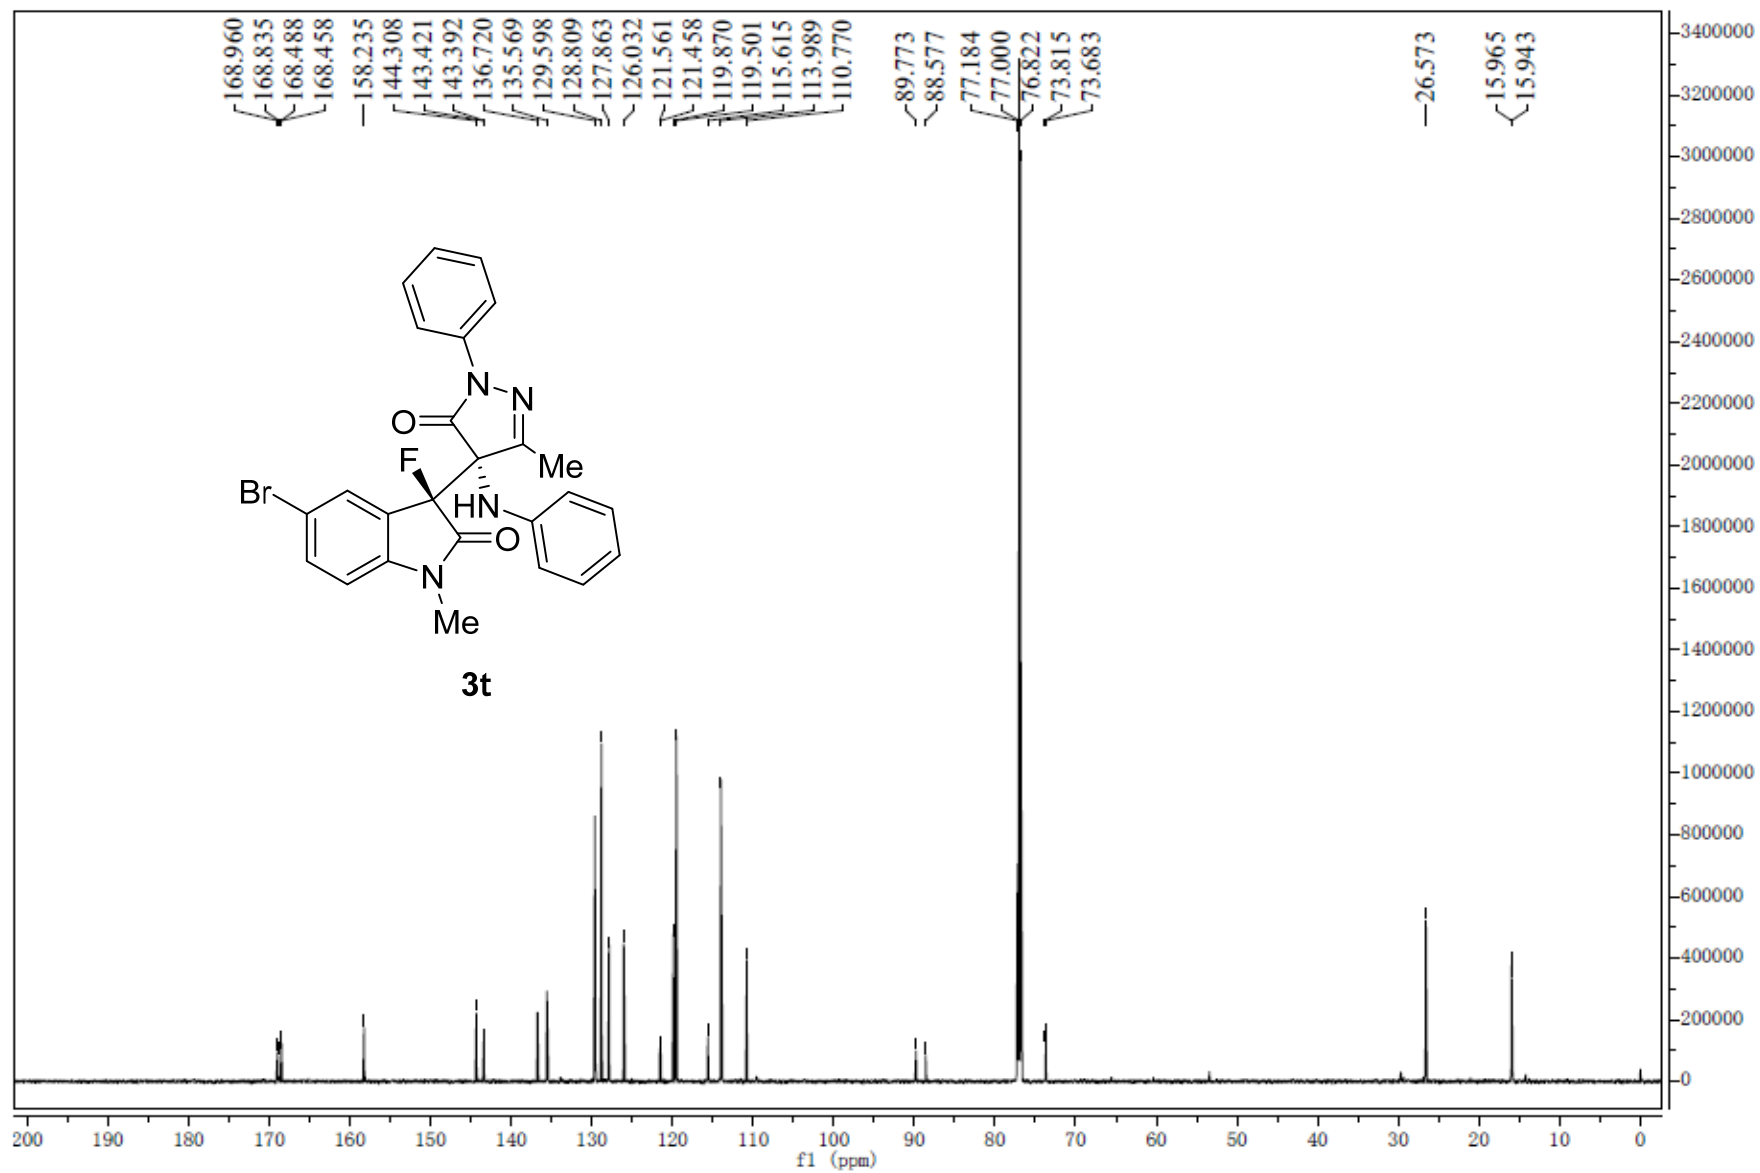

<sup>13</sup>C NMR (176 MHz)

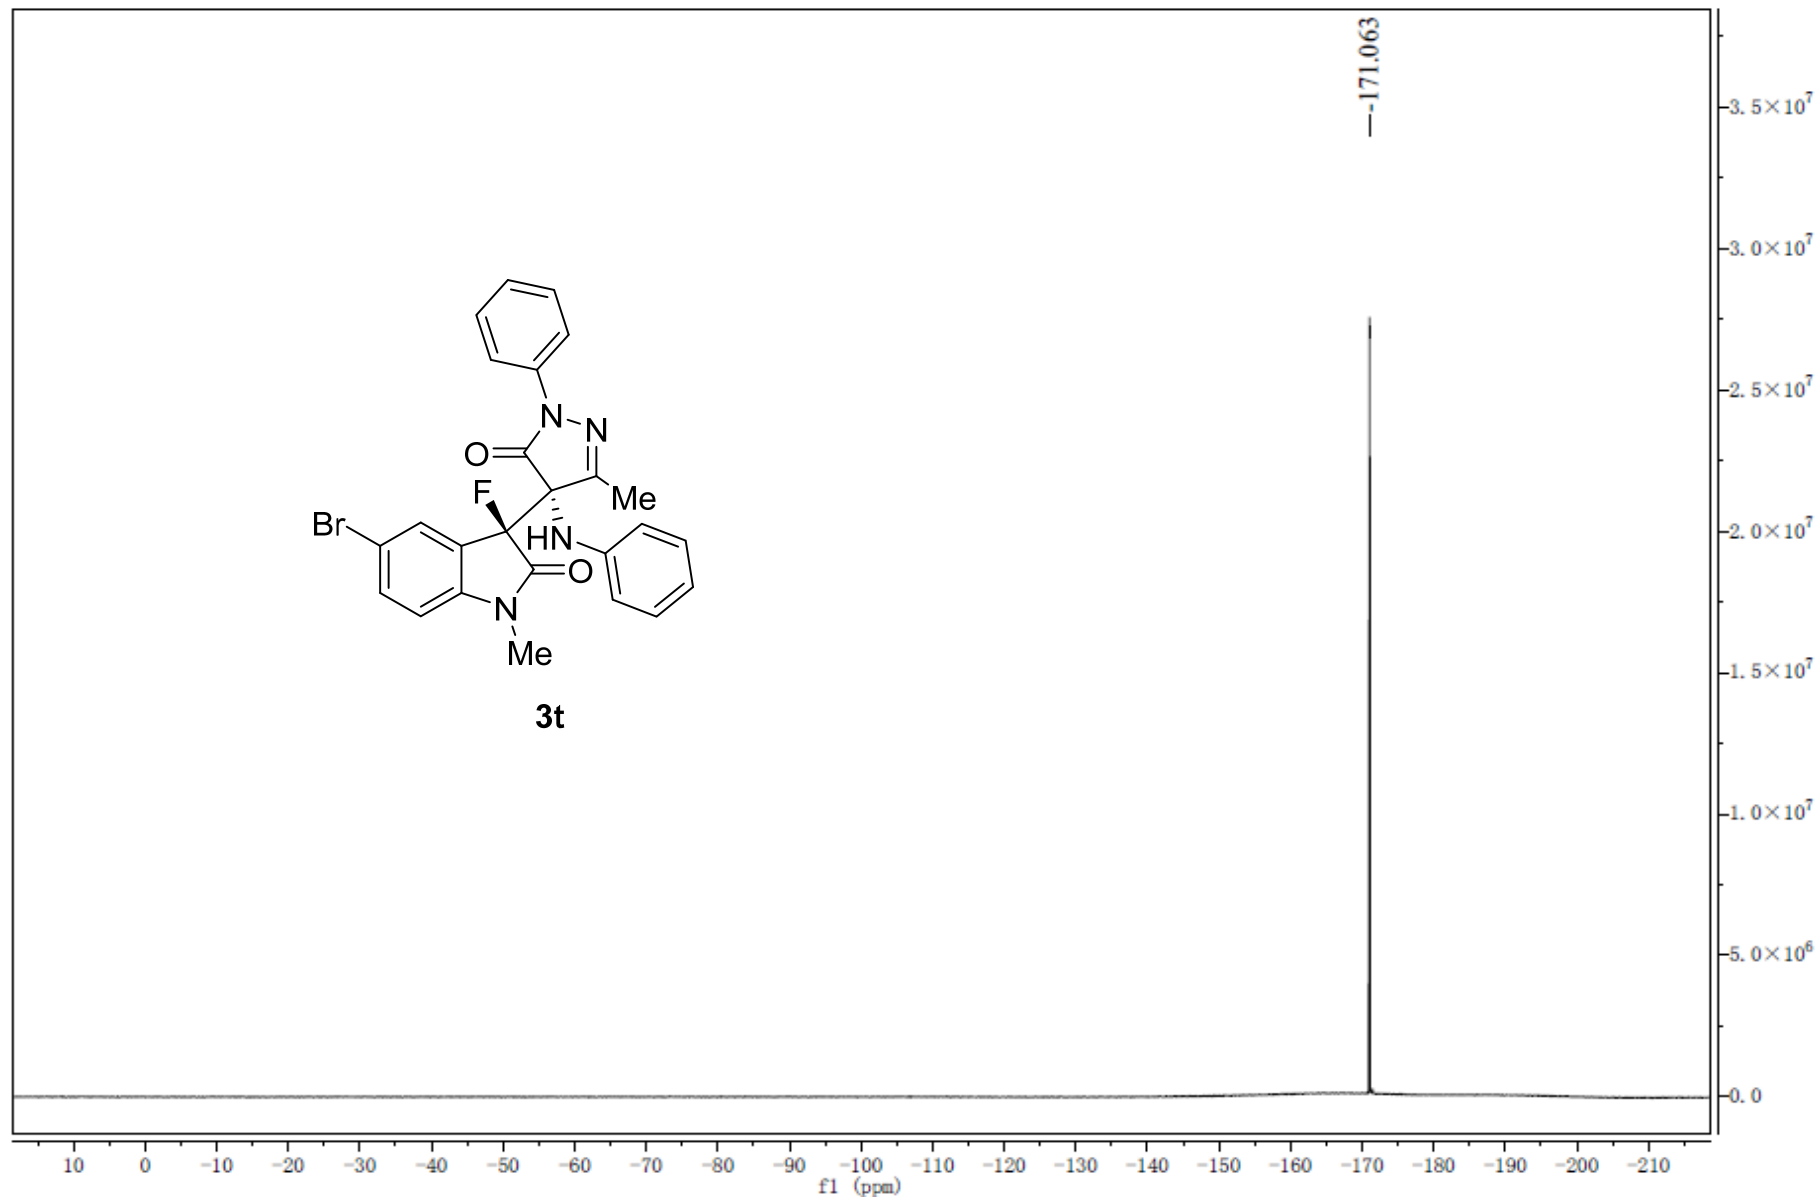

$^{19}\text{F}$  NMR (376 MHz)

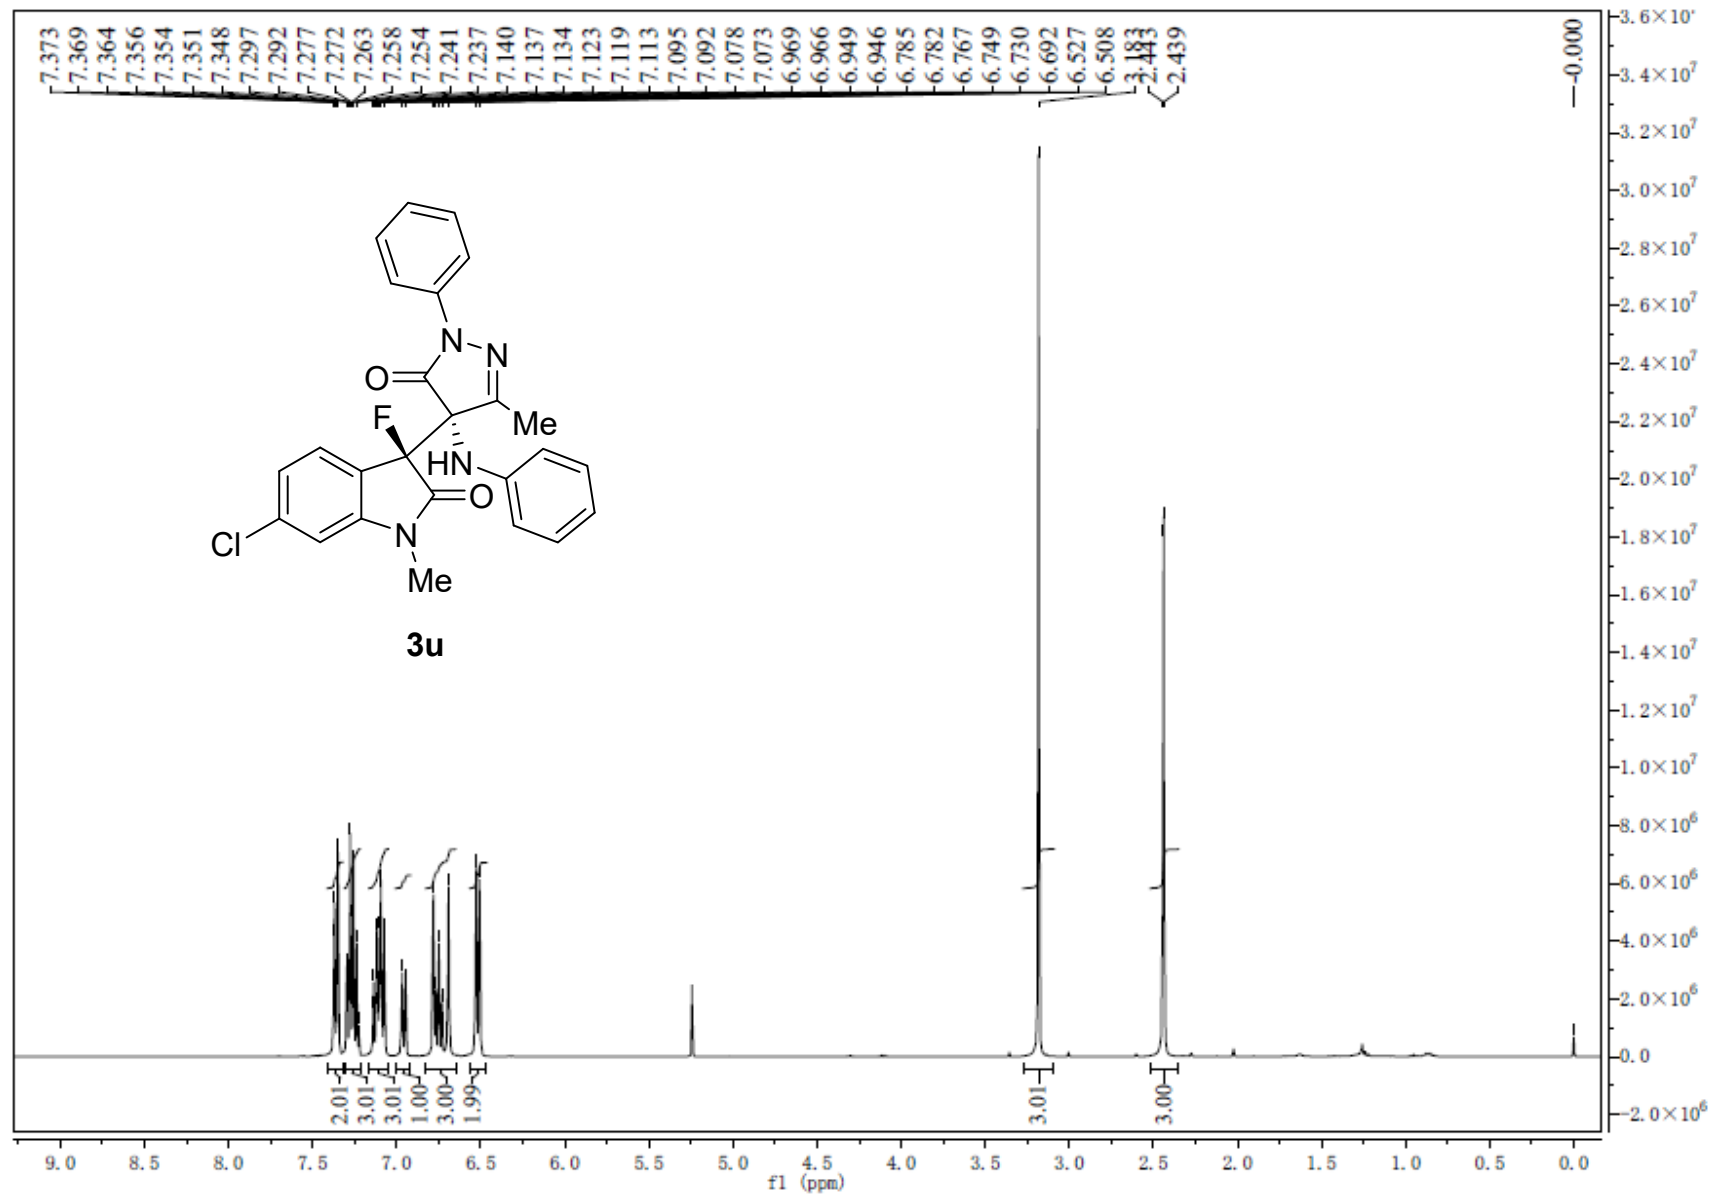

$^1\text{H NMR}$  (400 MHz)

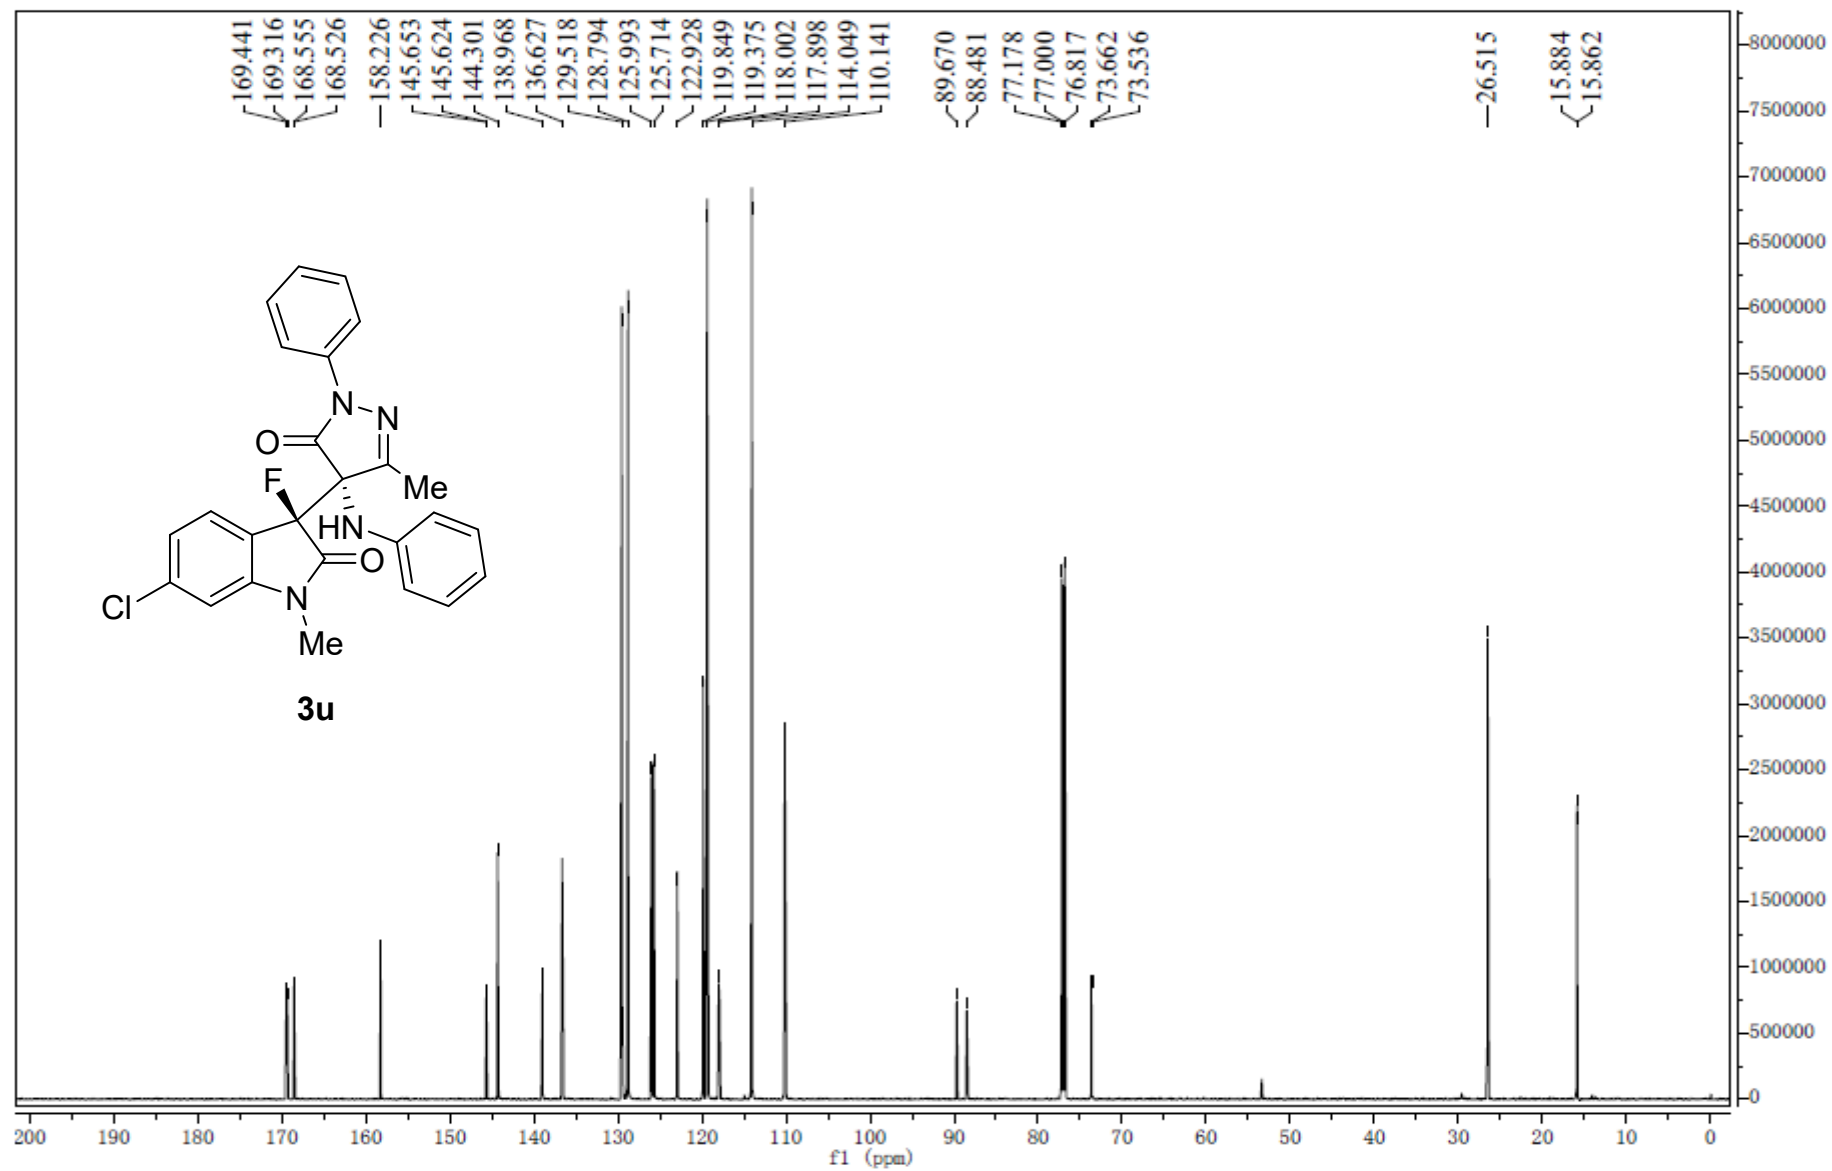

<sup>13</sup>C NMR (176 MHz)

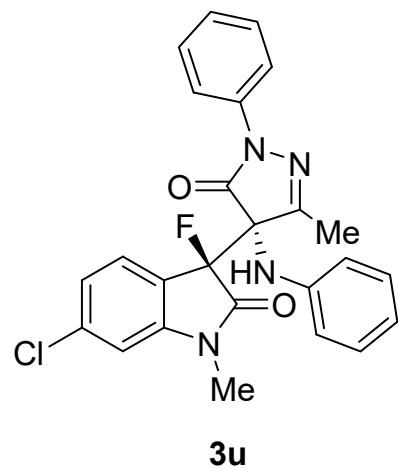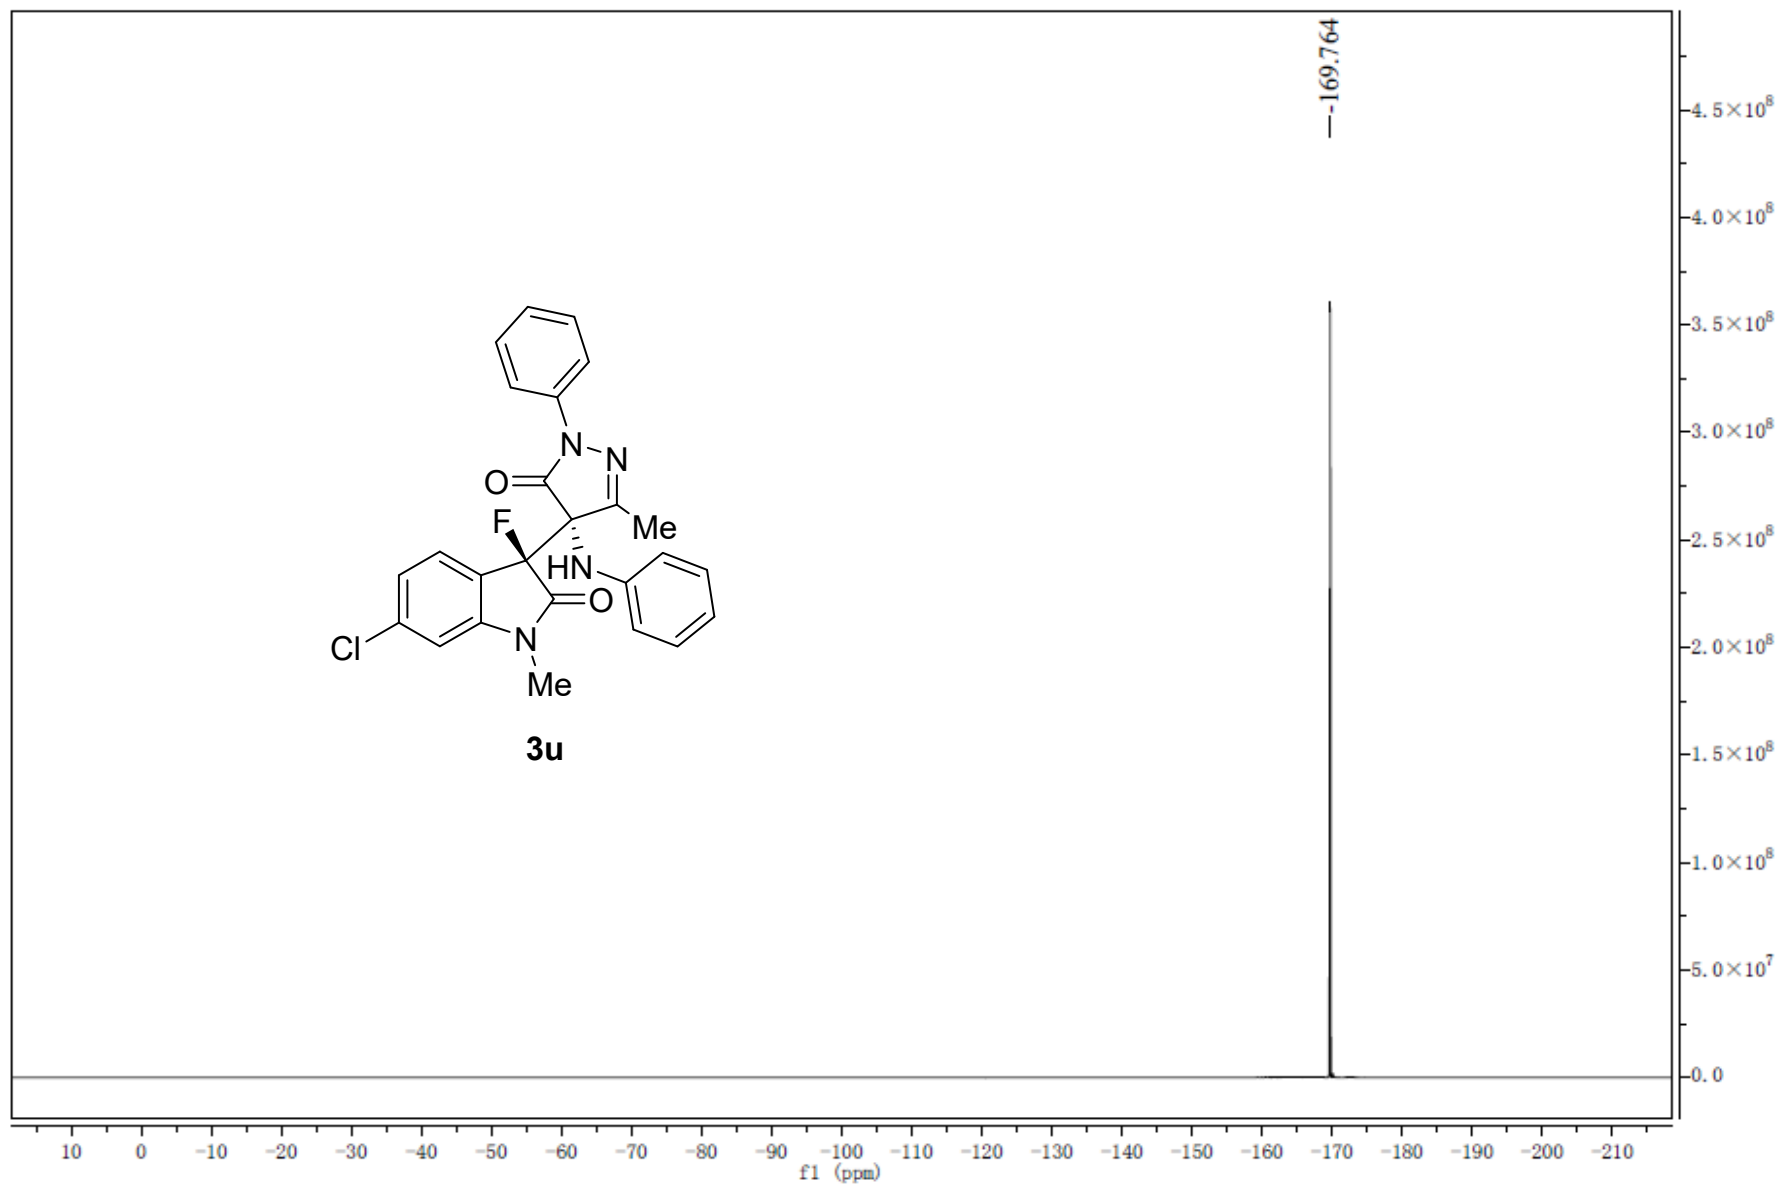

$^{19}\text{F}$  NMR (376 MHz)

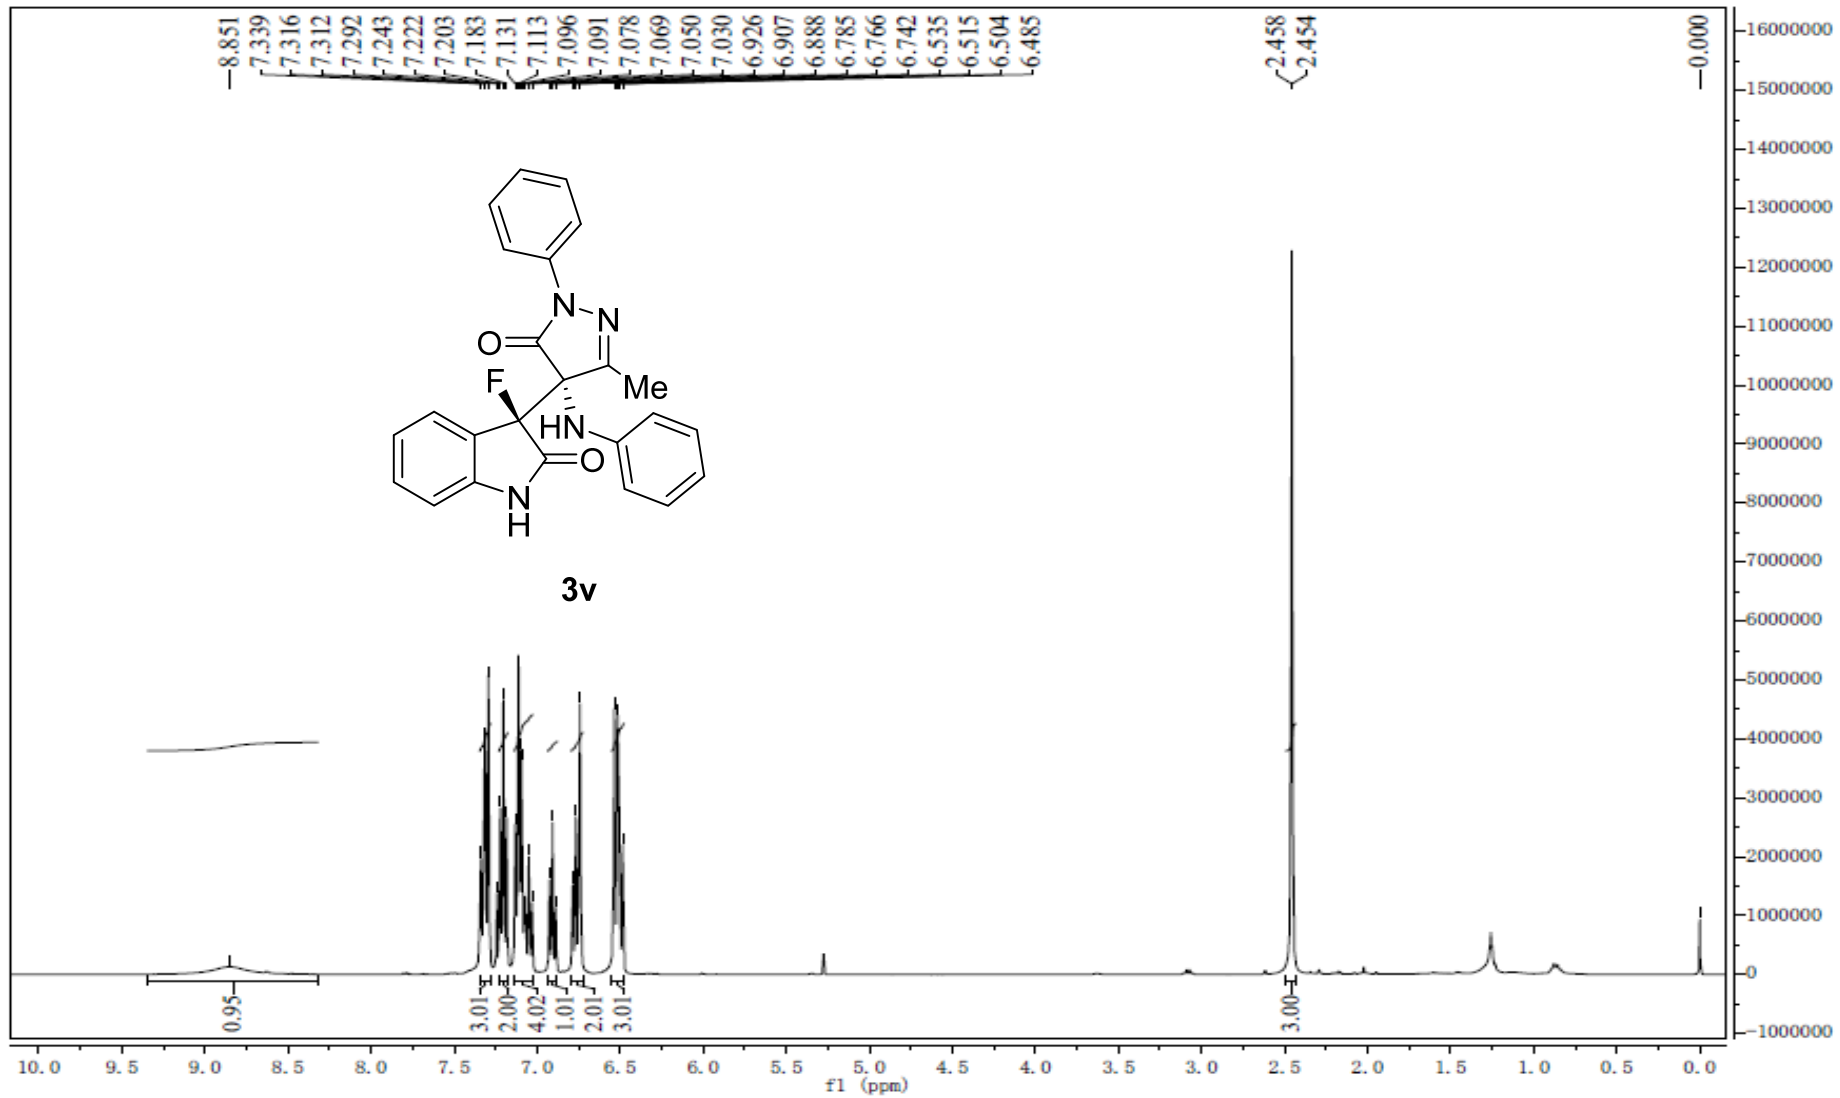

<sup>1</sup>H NMR (400 MHz)



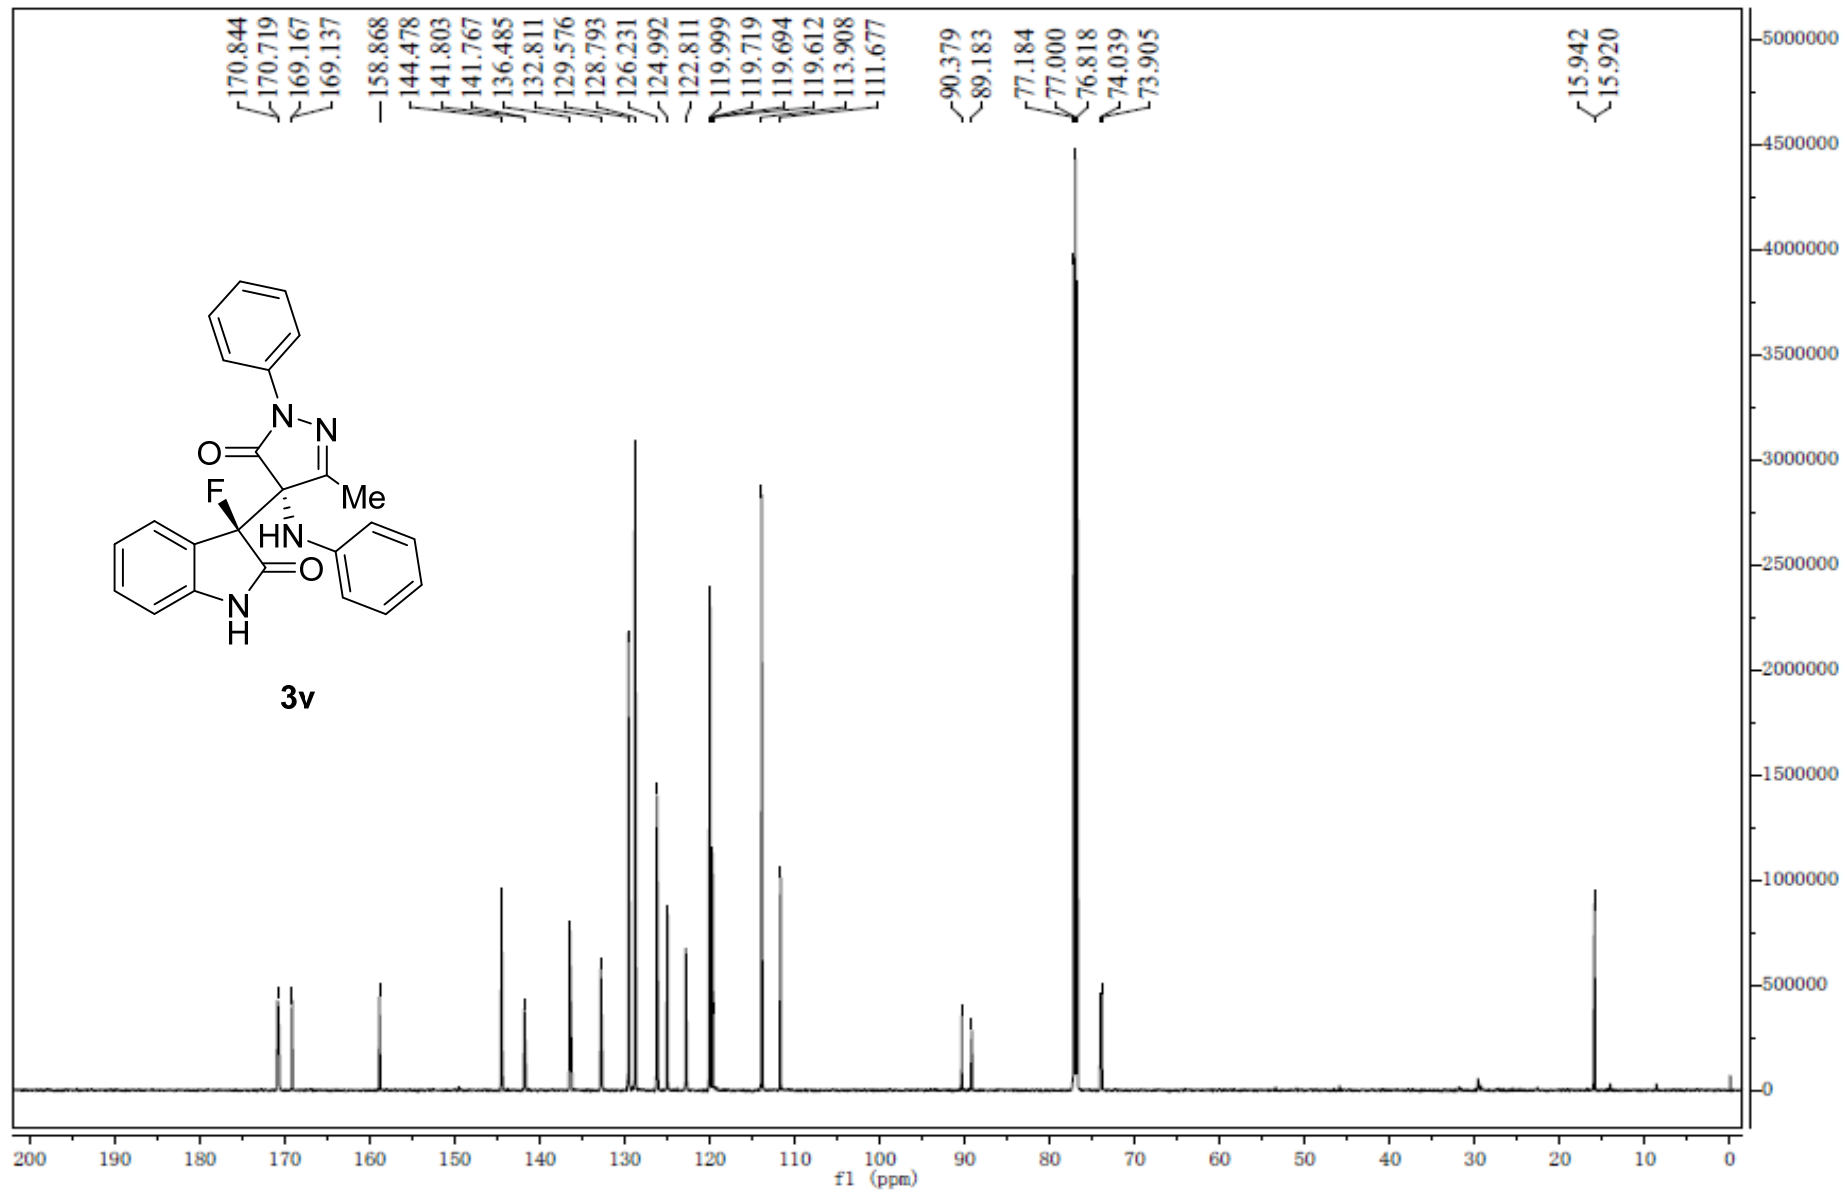

<sup>13</sup>C NMR (176 MHz)

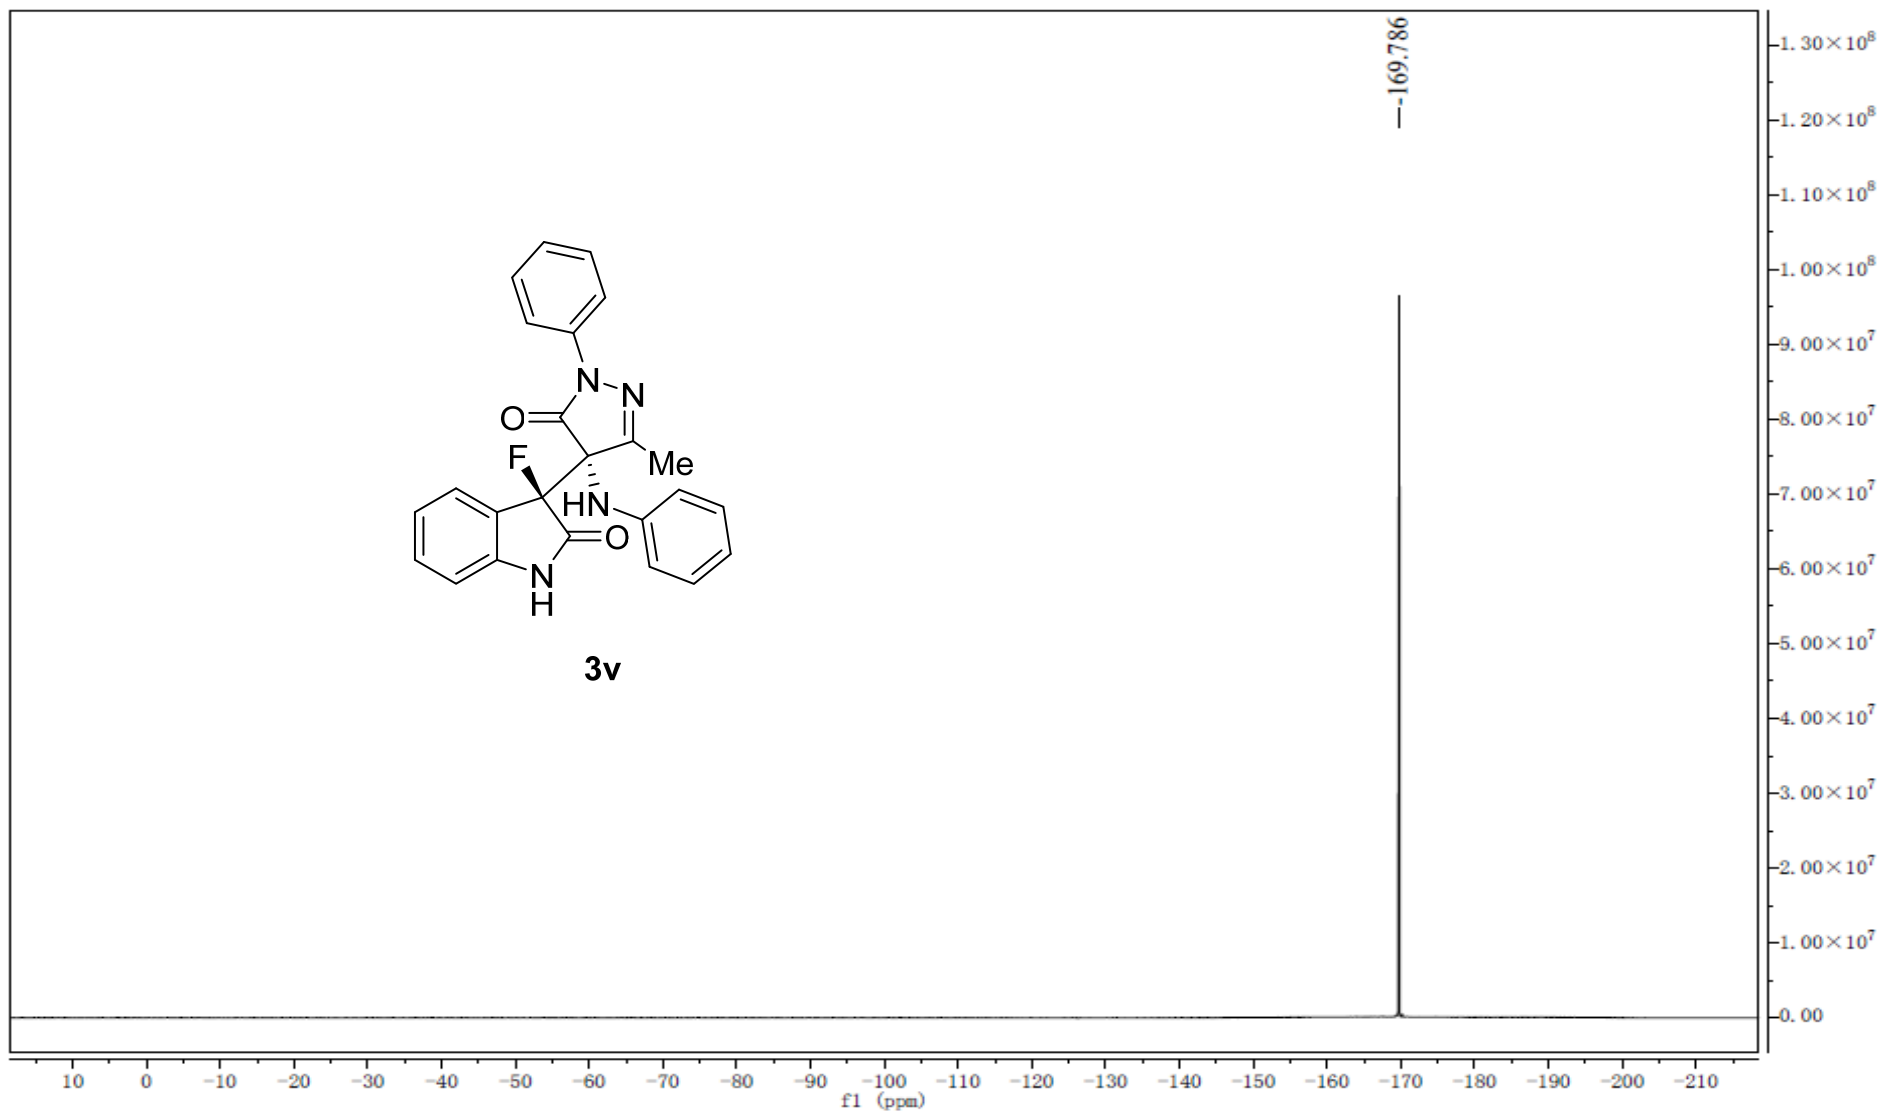

$^{19}\text{F}$  NMR (376 MHz)

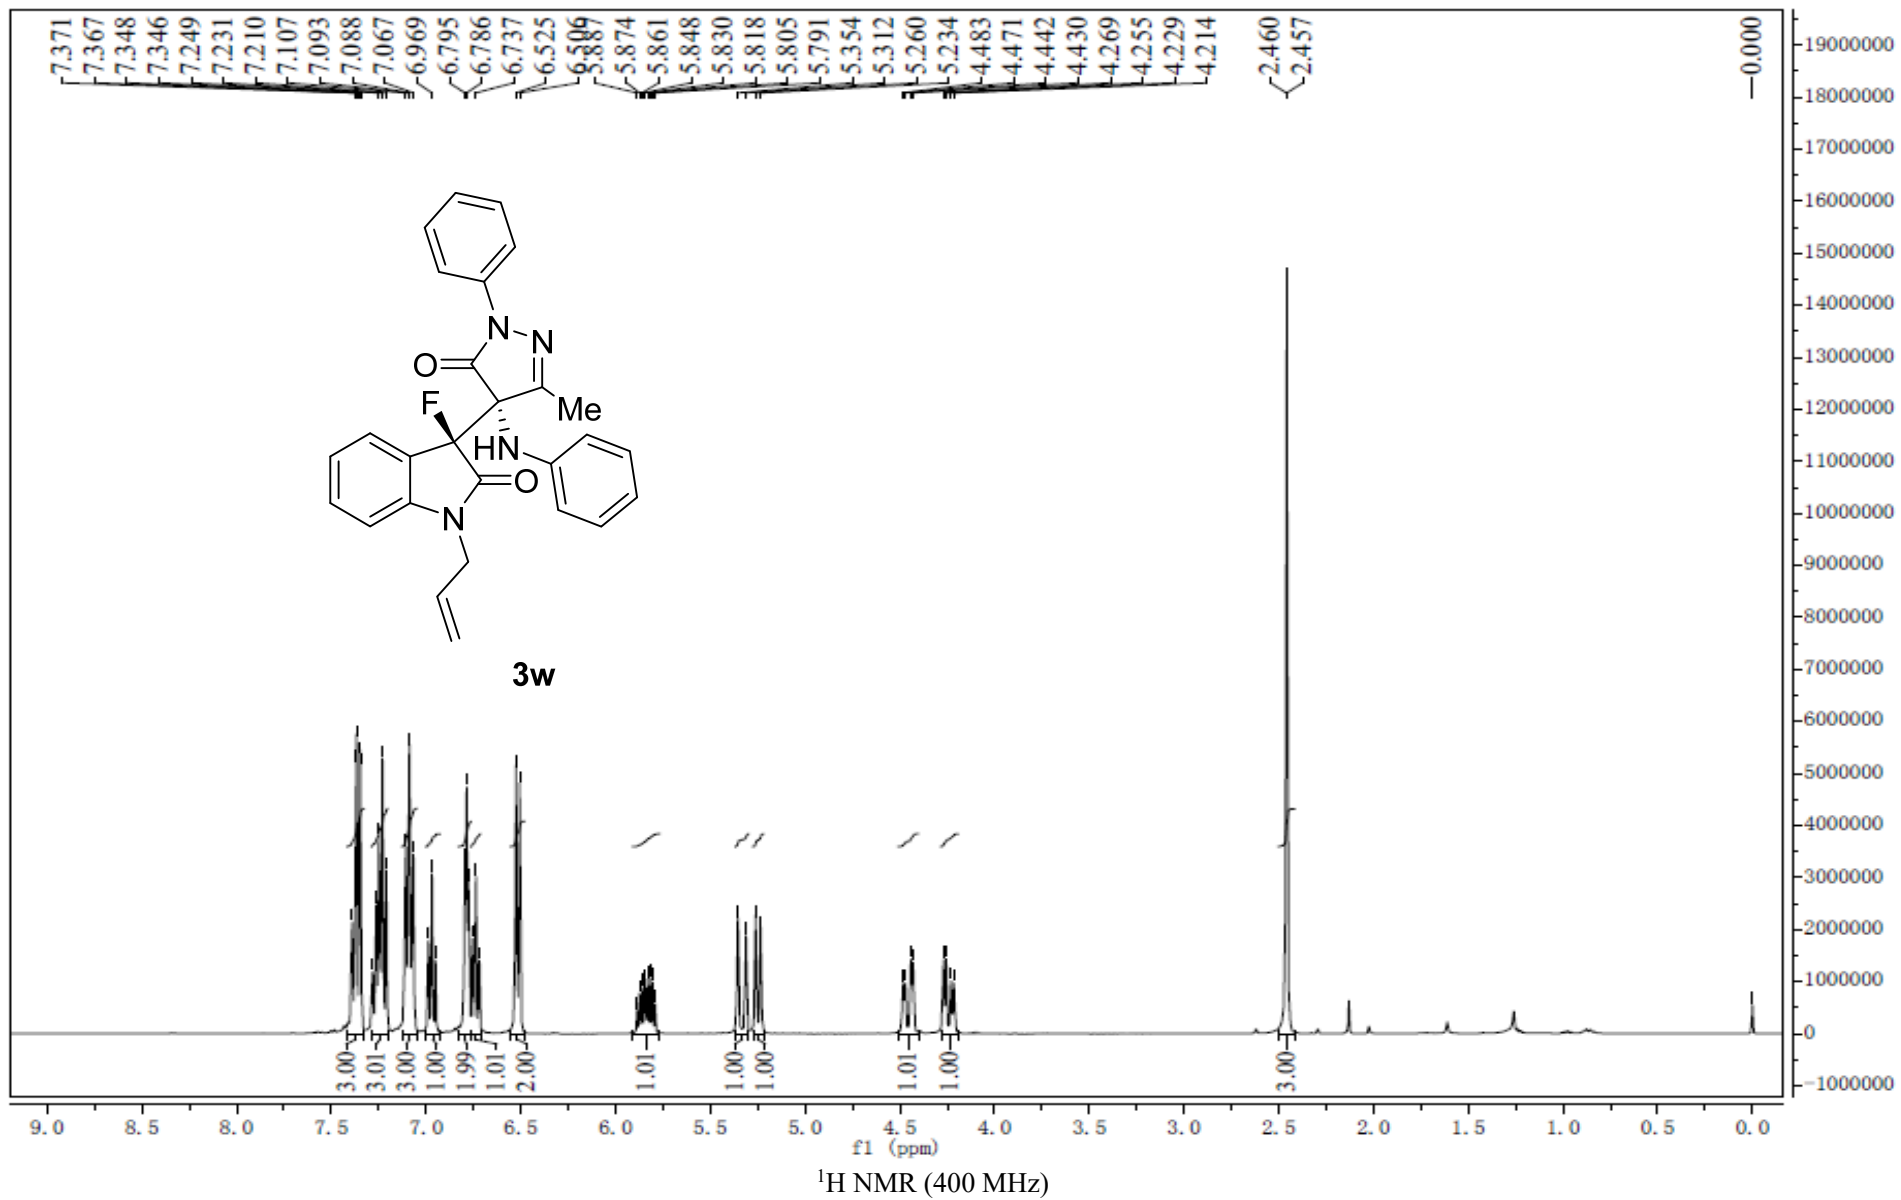

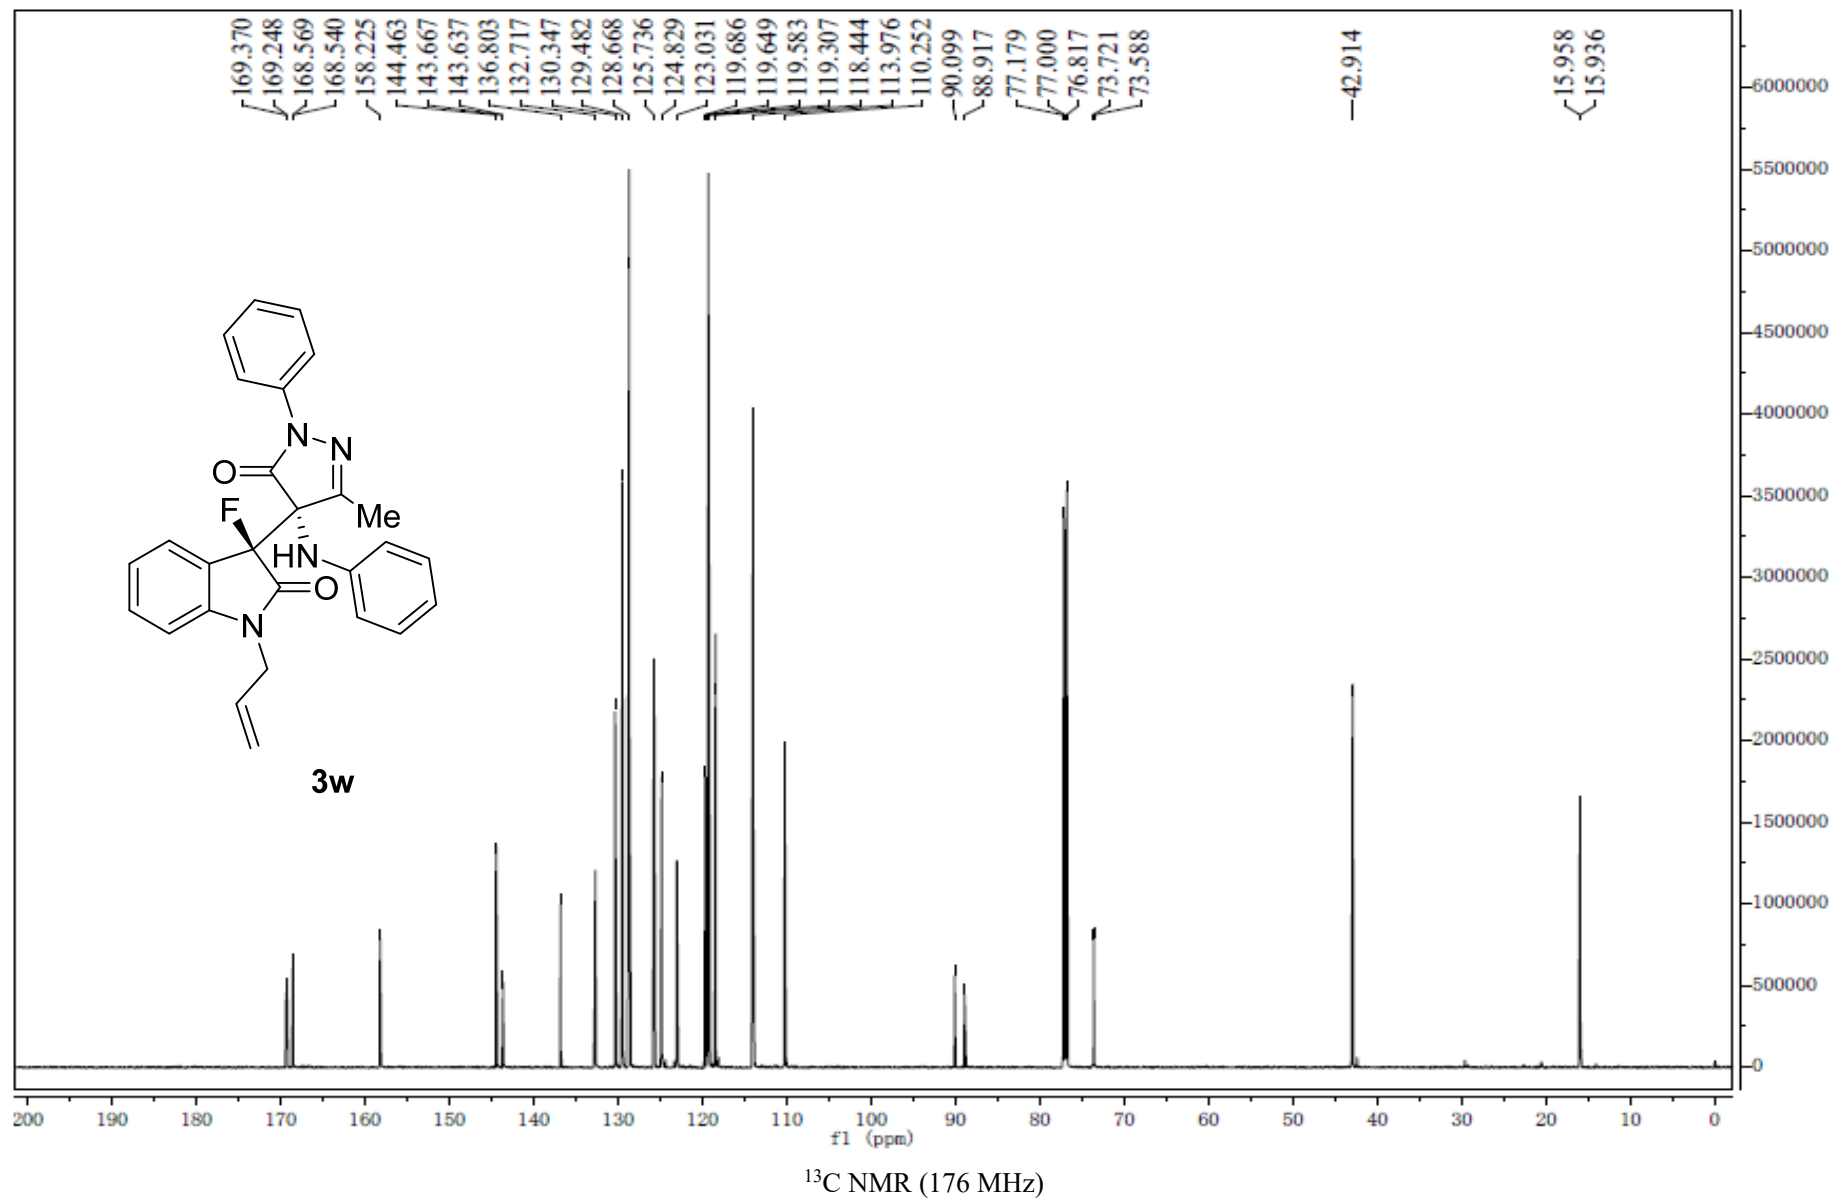

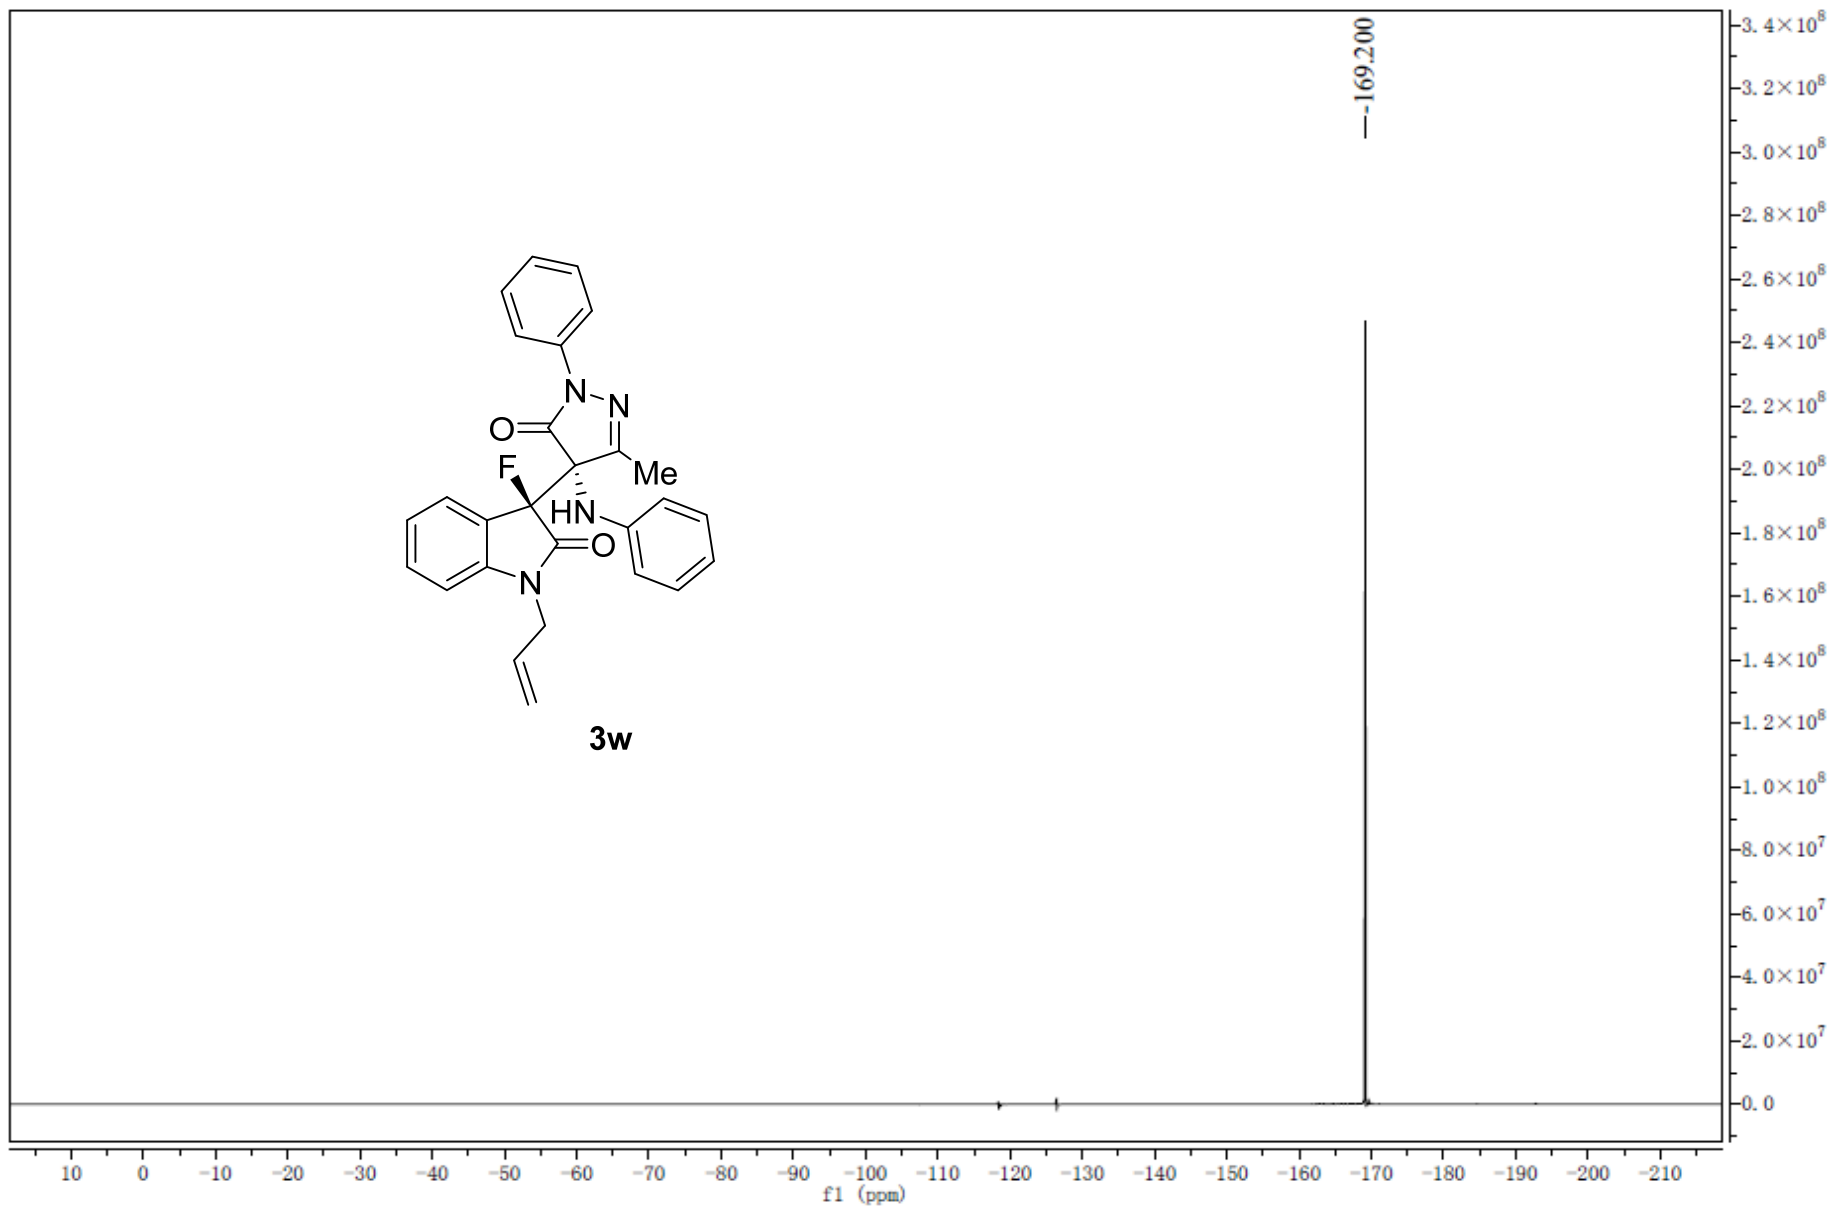

$^{19}\text{F}$  NMR (376 MHz)

S68

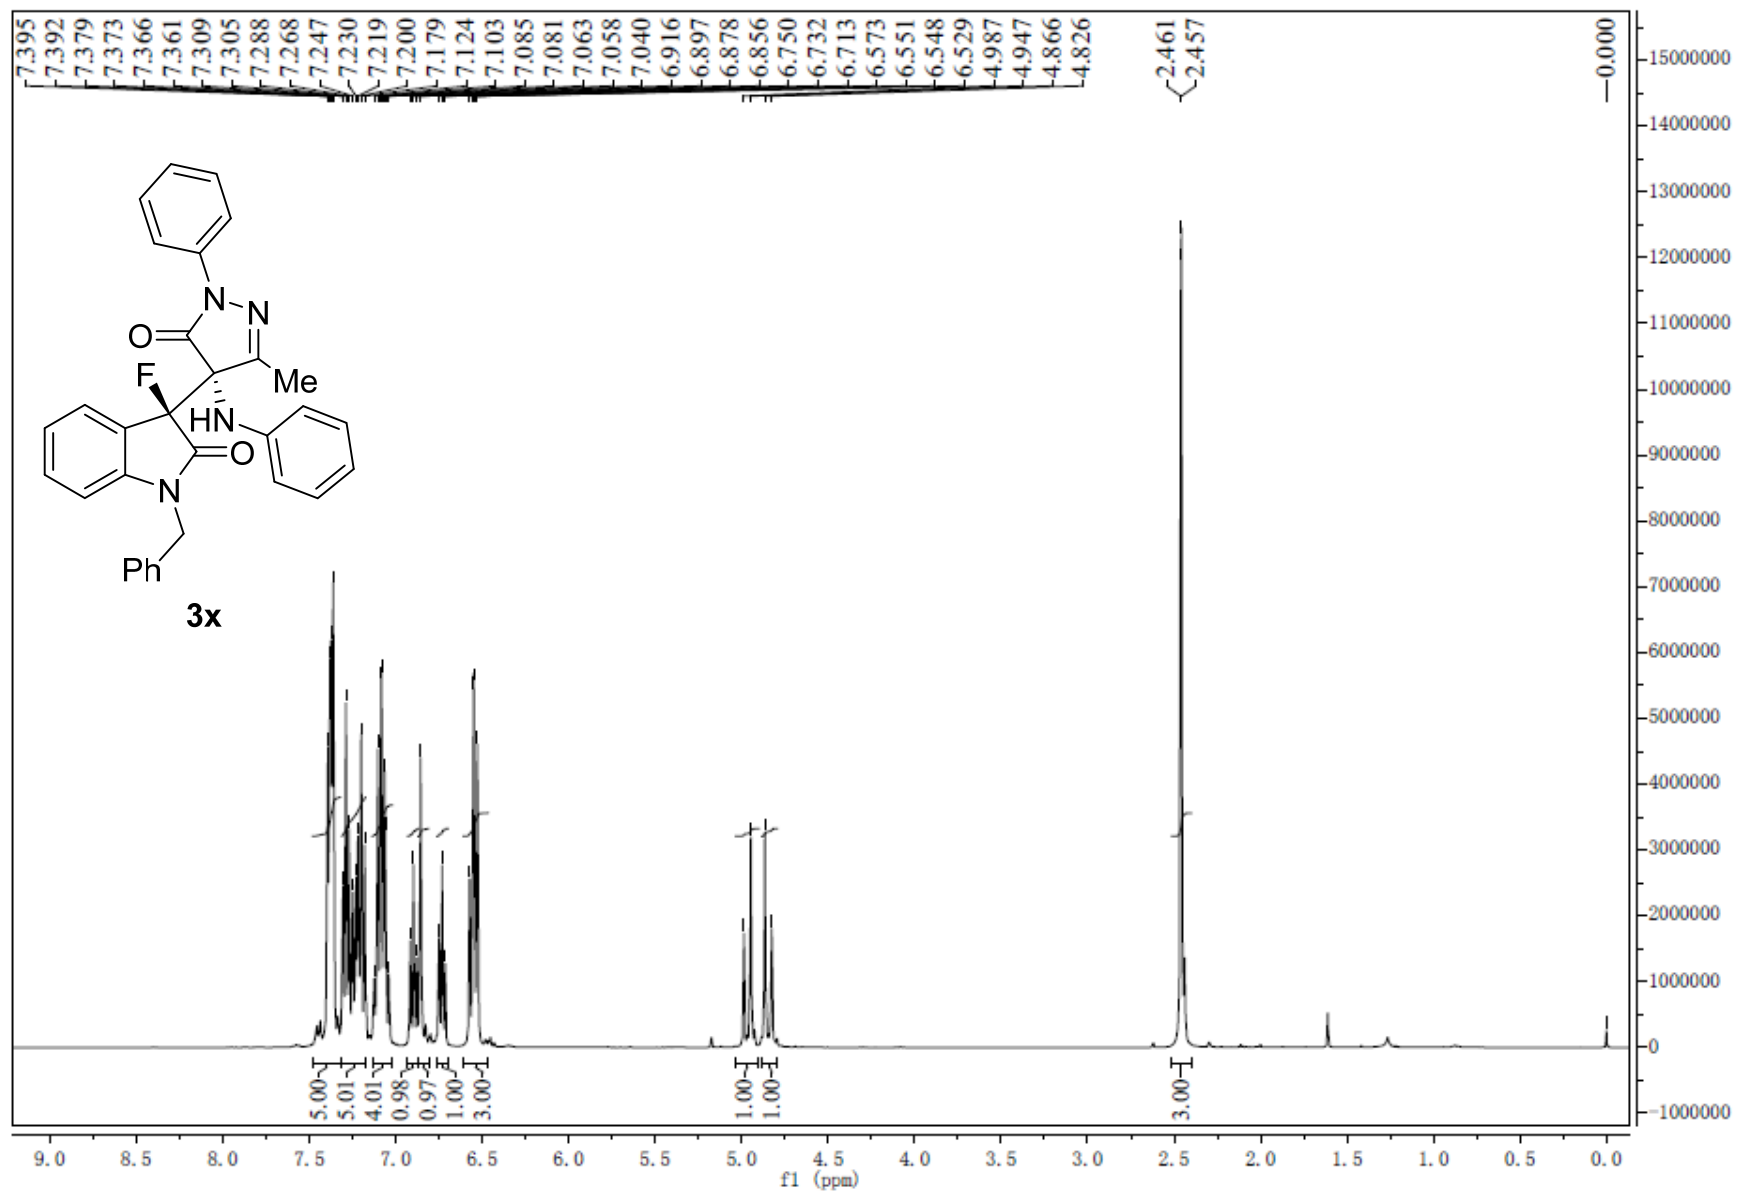

<sup>1</sup>H NMR (400 MHz)

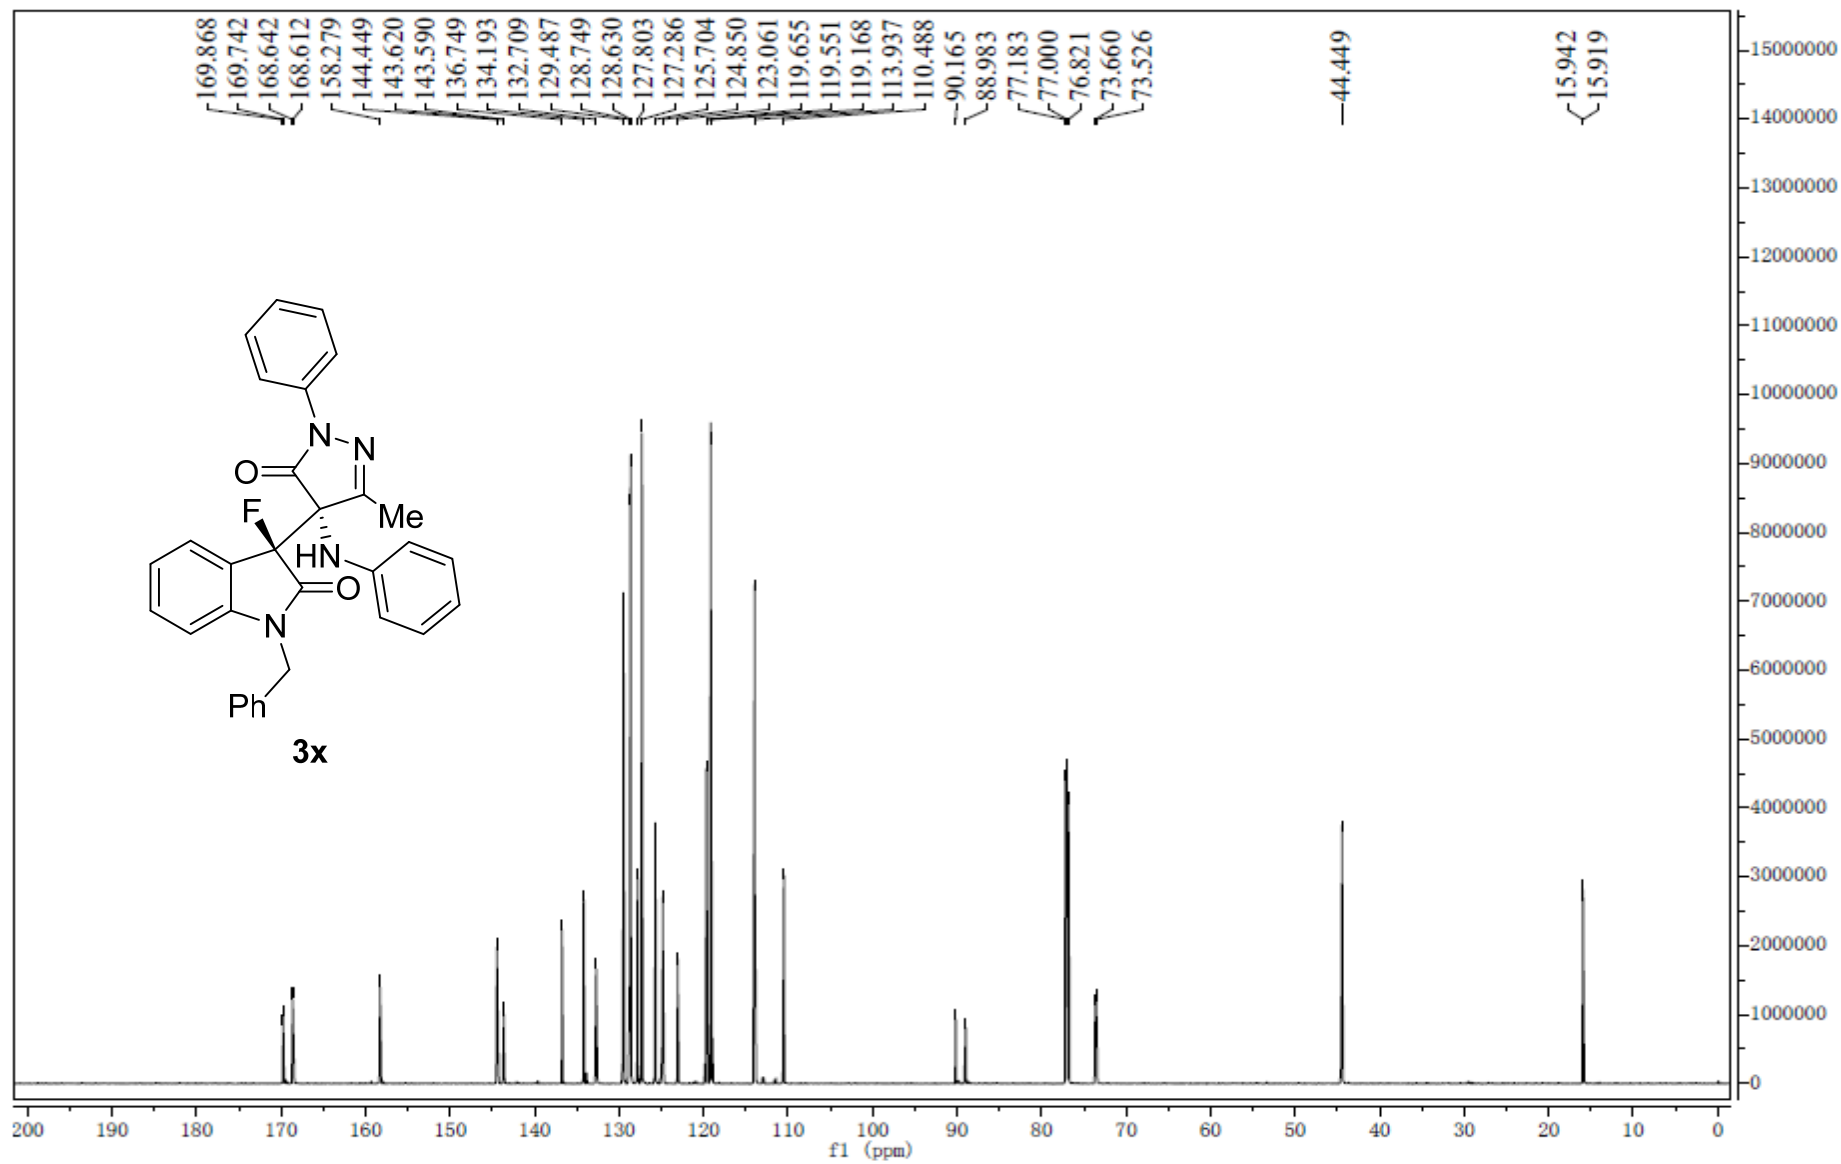

$^{13}\text{C}$  NMR (176 MHz)

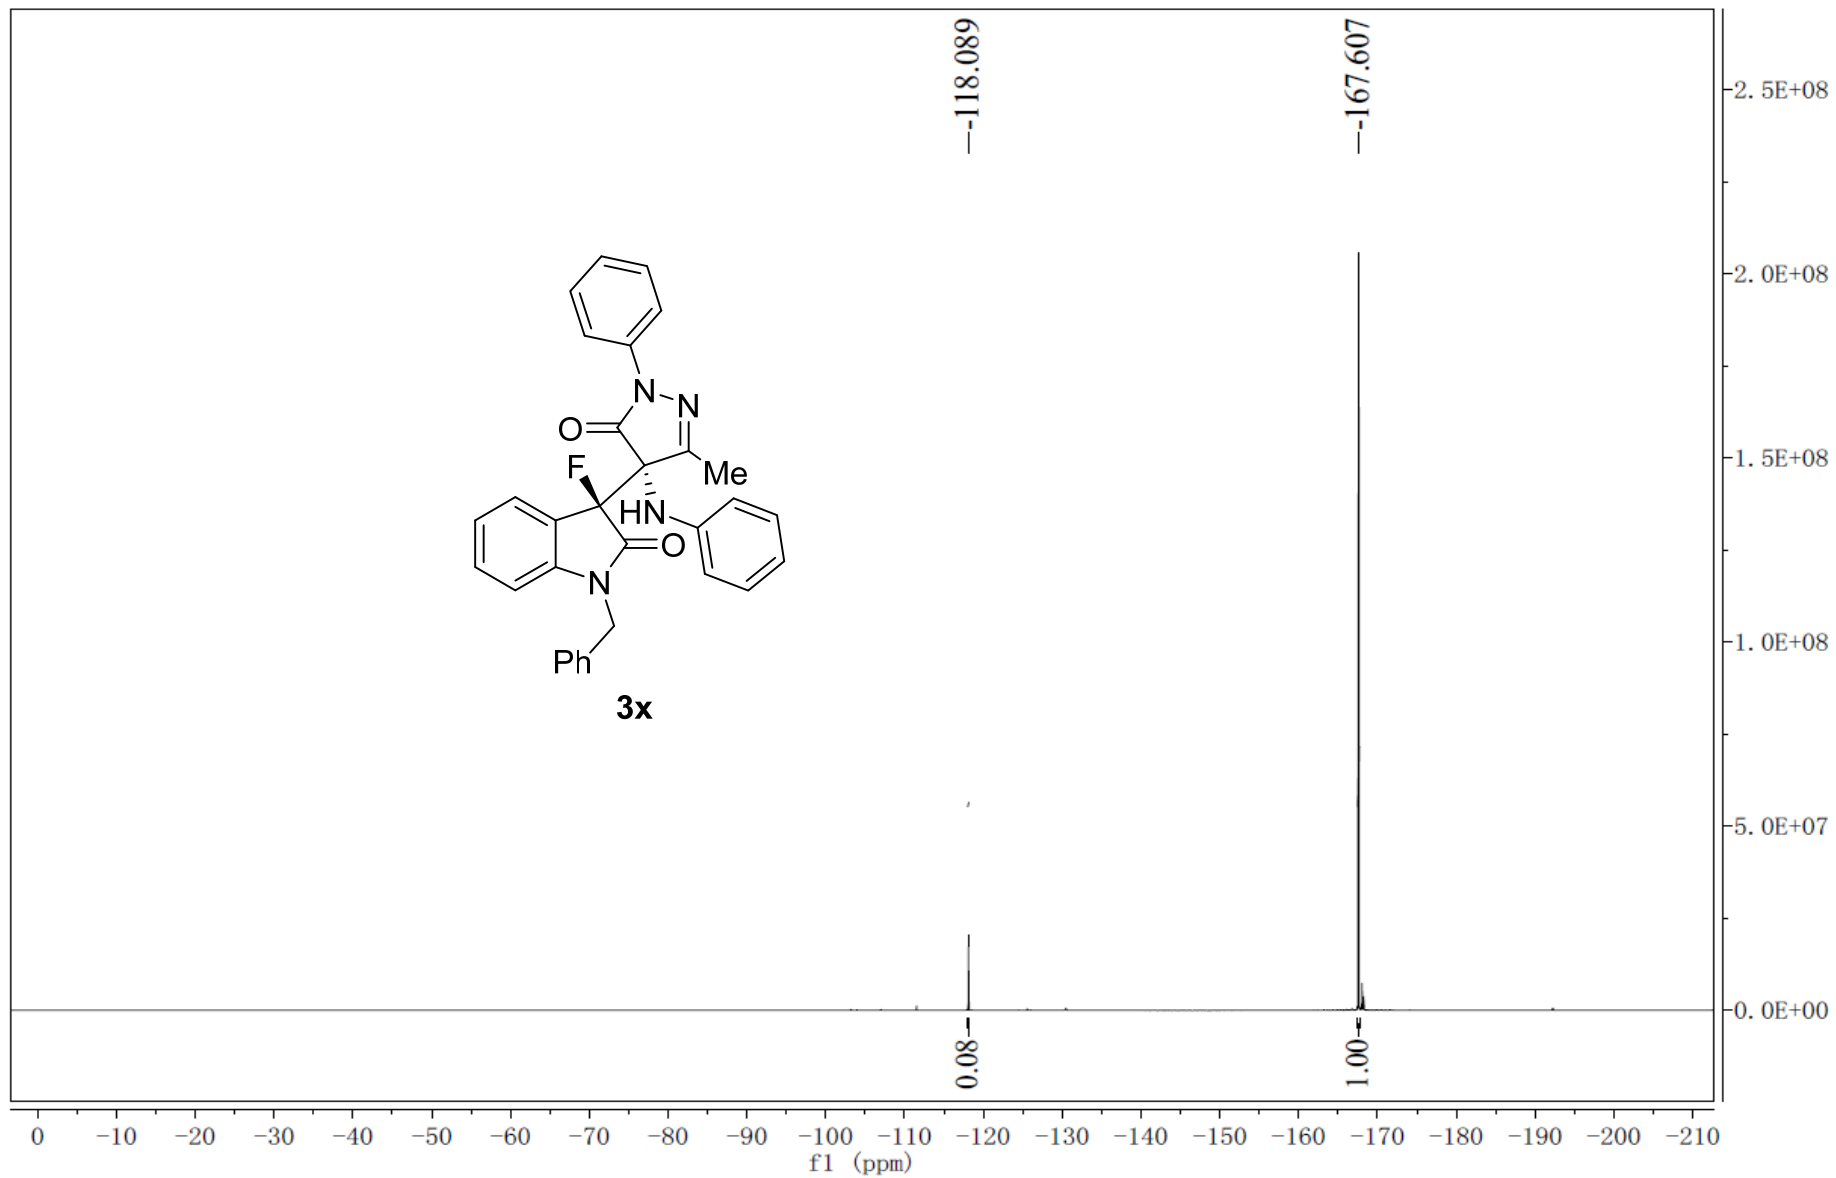

<sup>19</sup>F NMR (376 MHz)



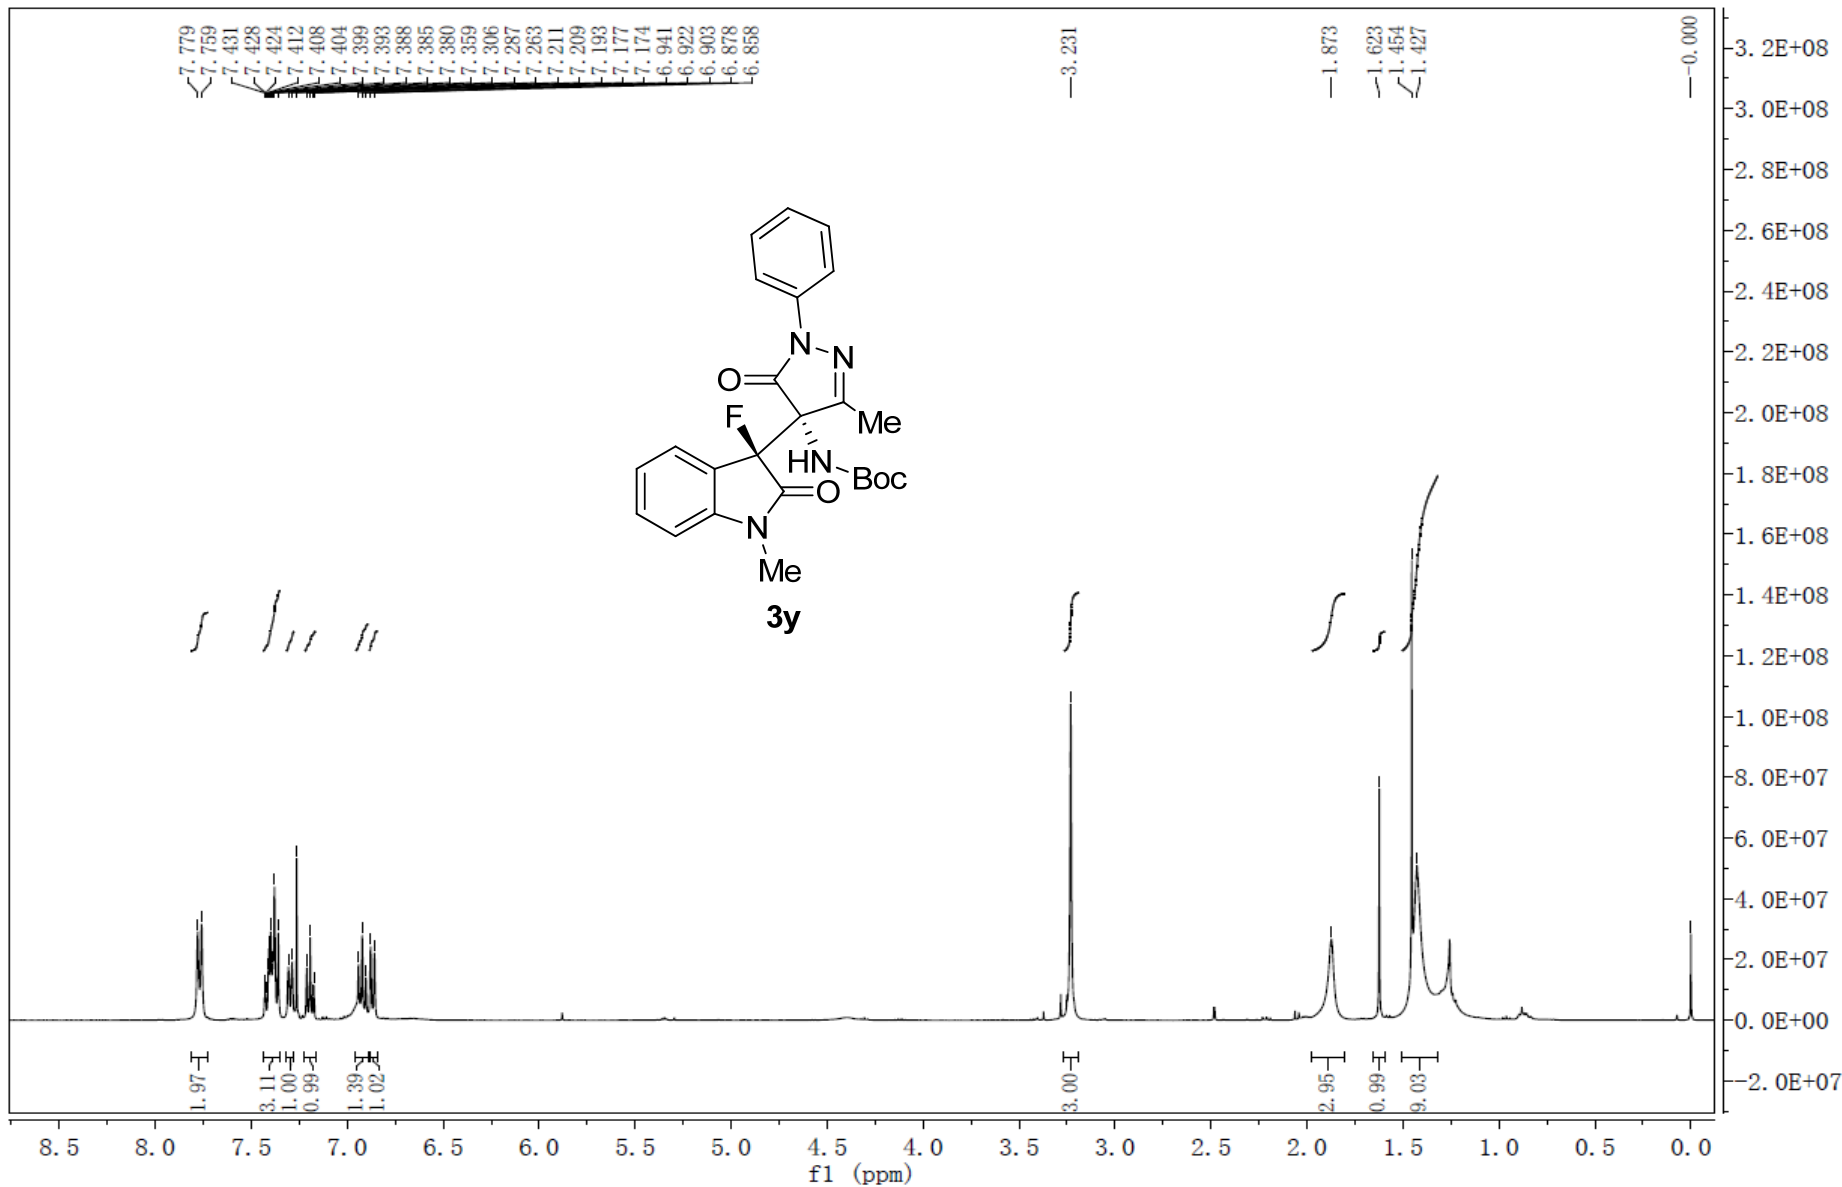

<sup>1</sup>H NMR (400 MHz)

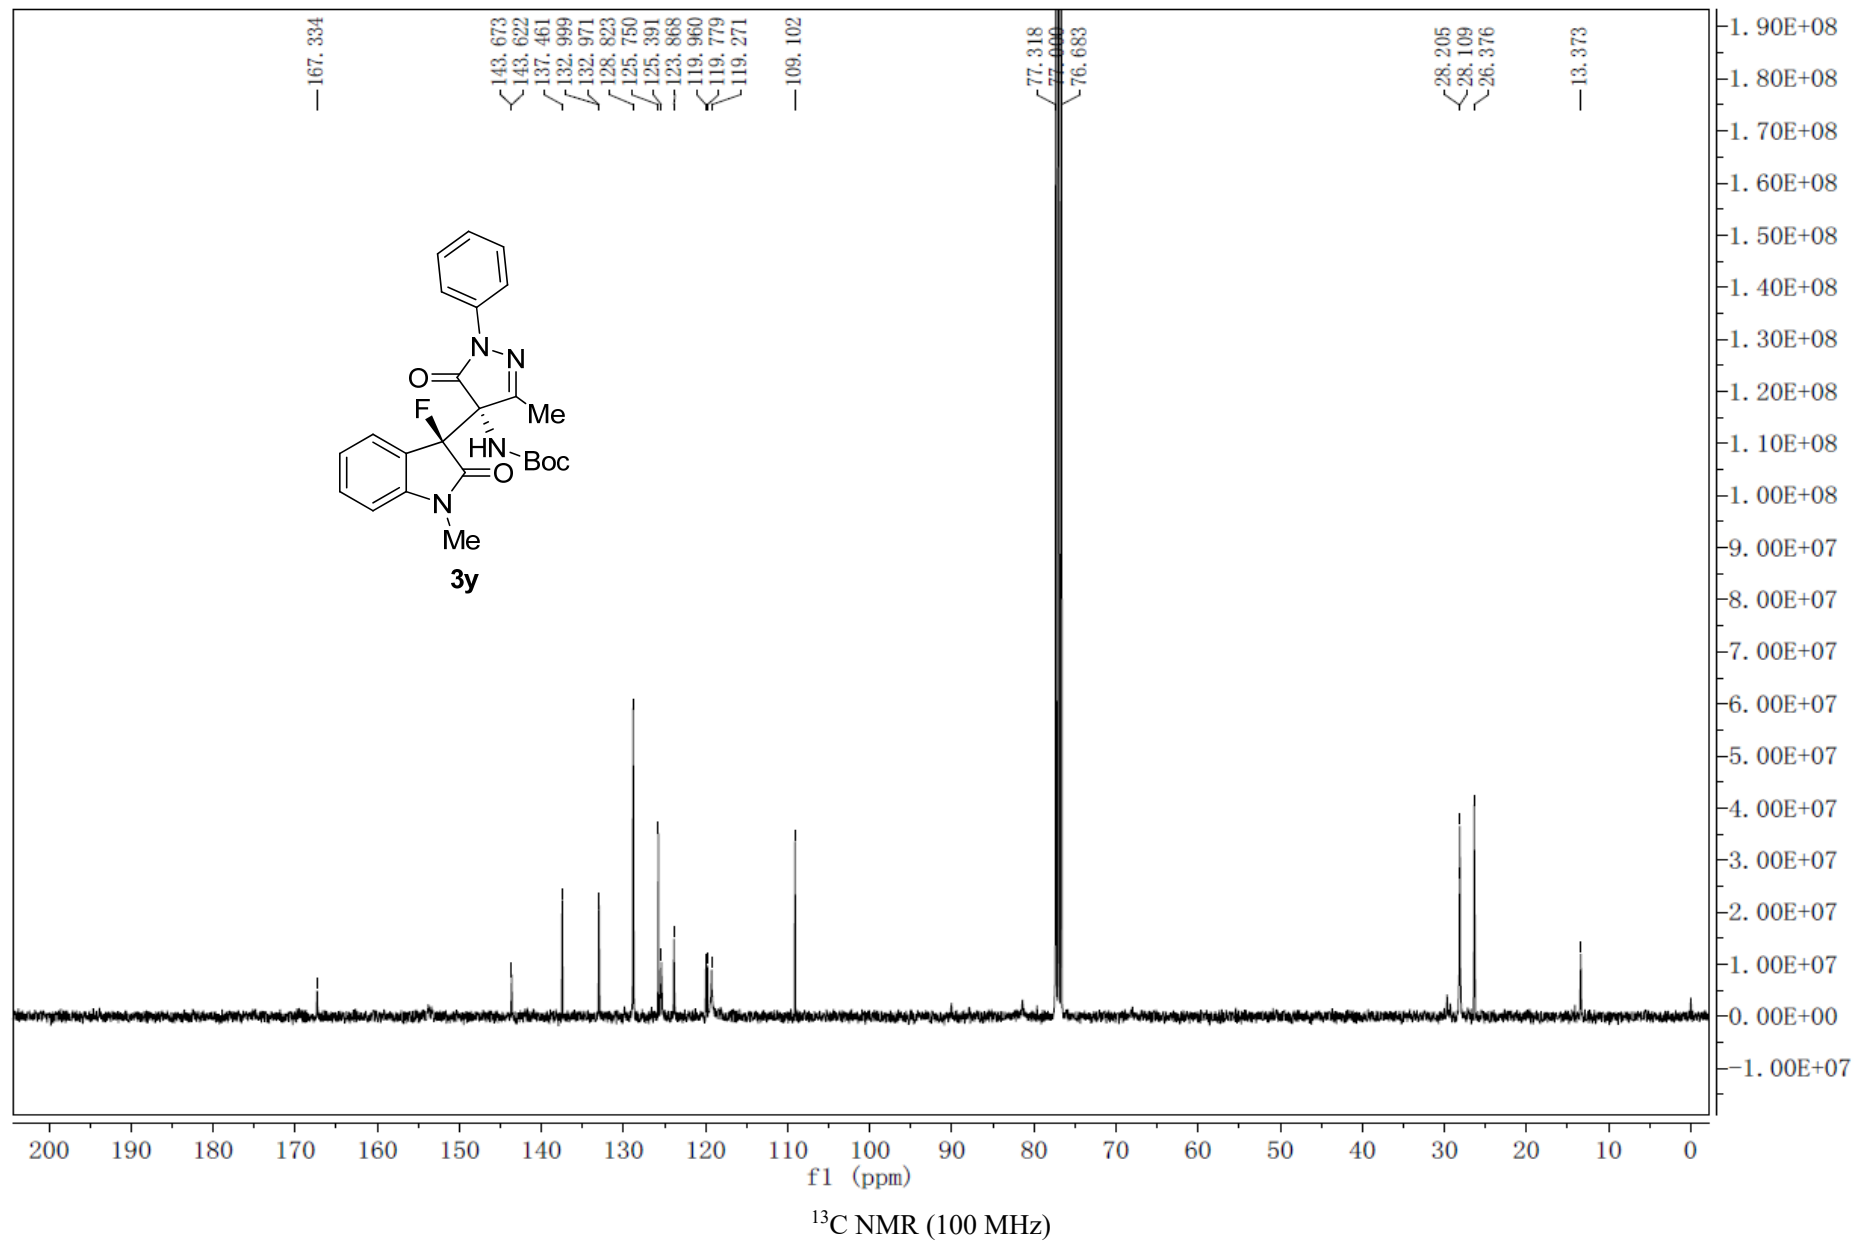

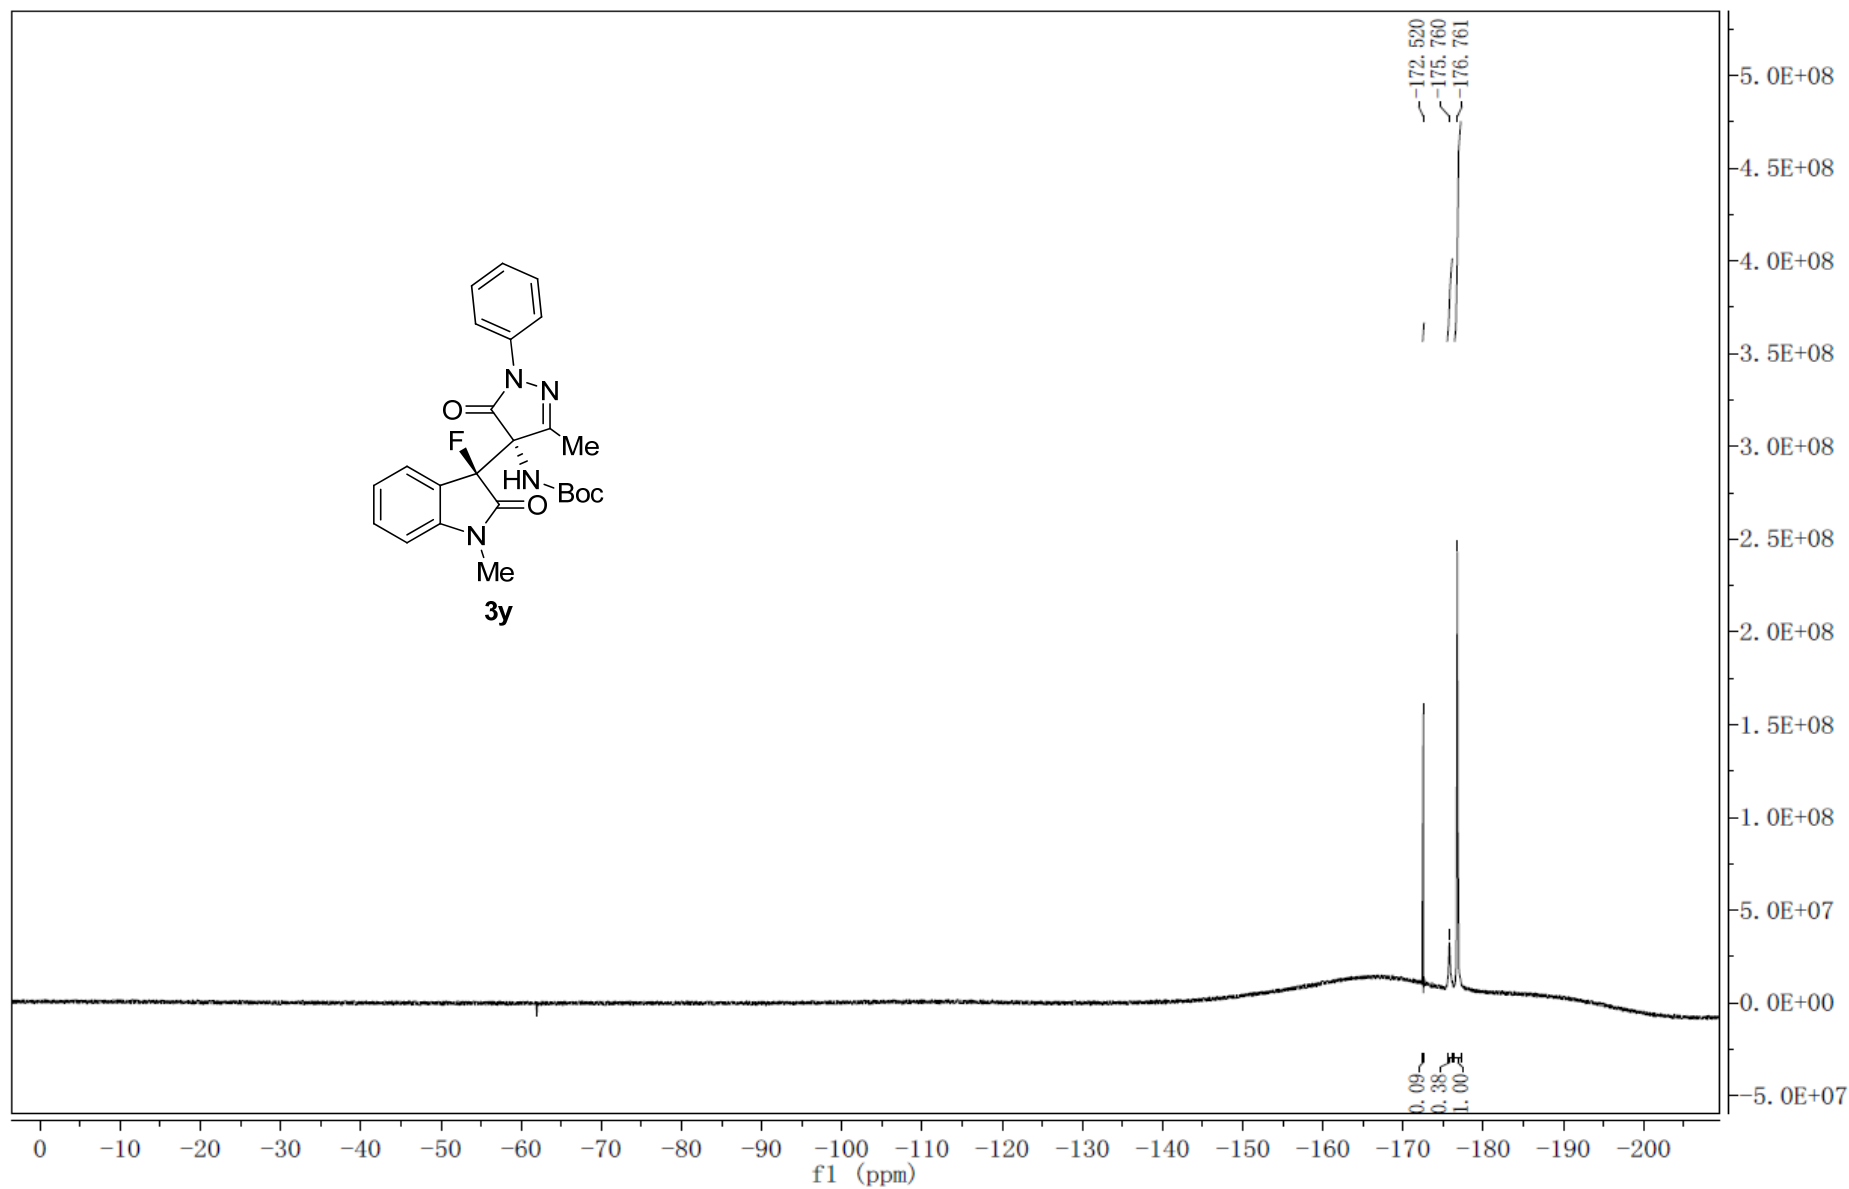

$^{19}\text{F}$  NMR (376 MHz)

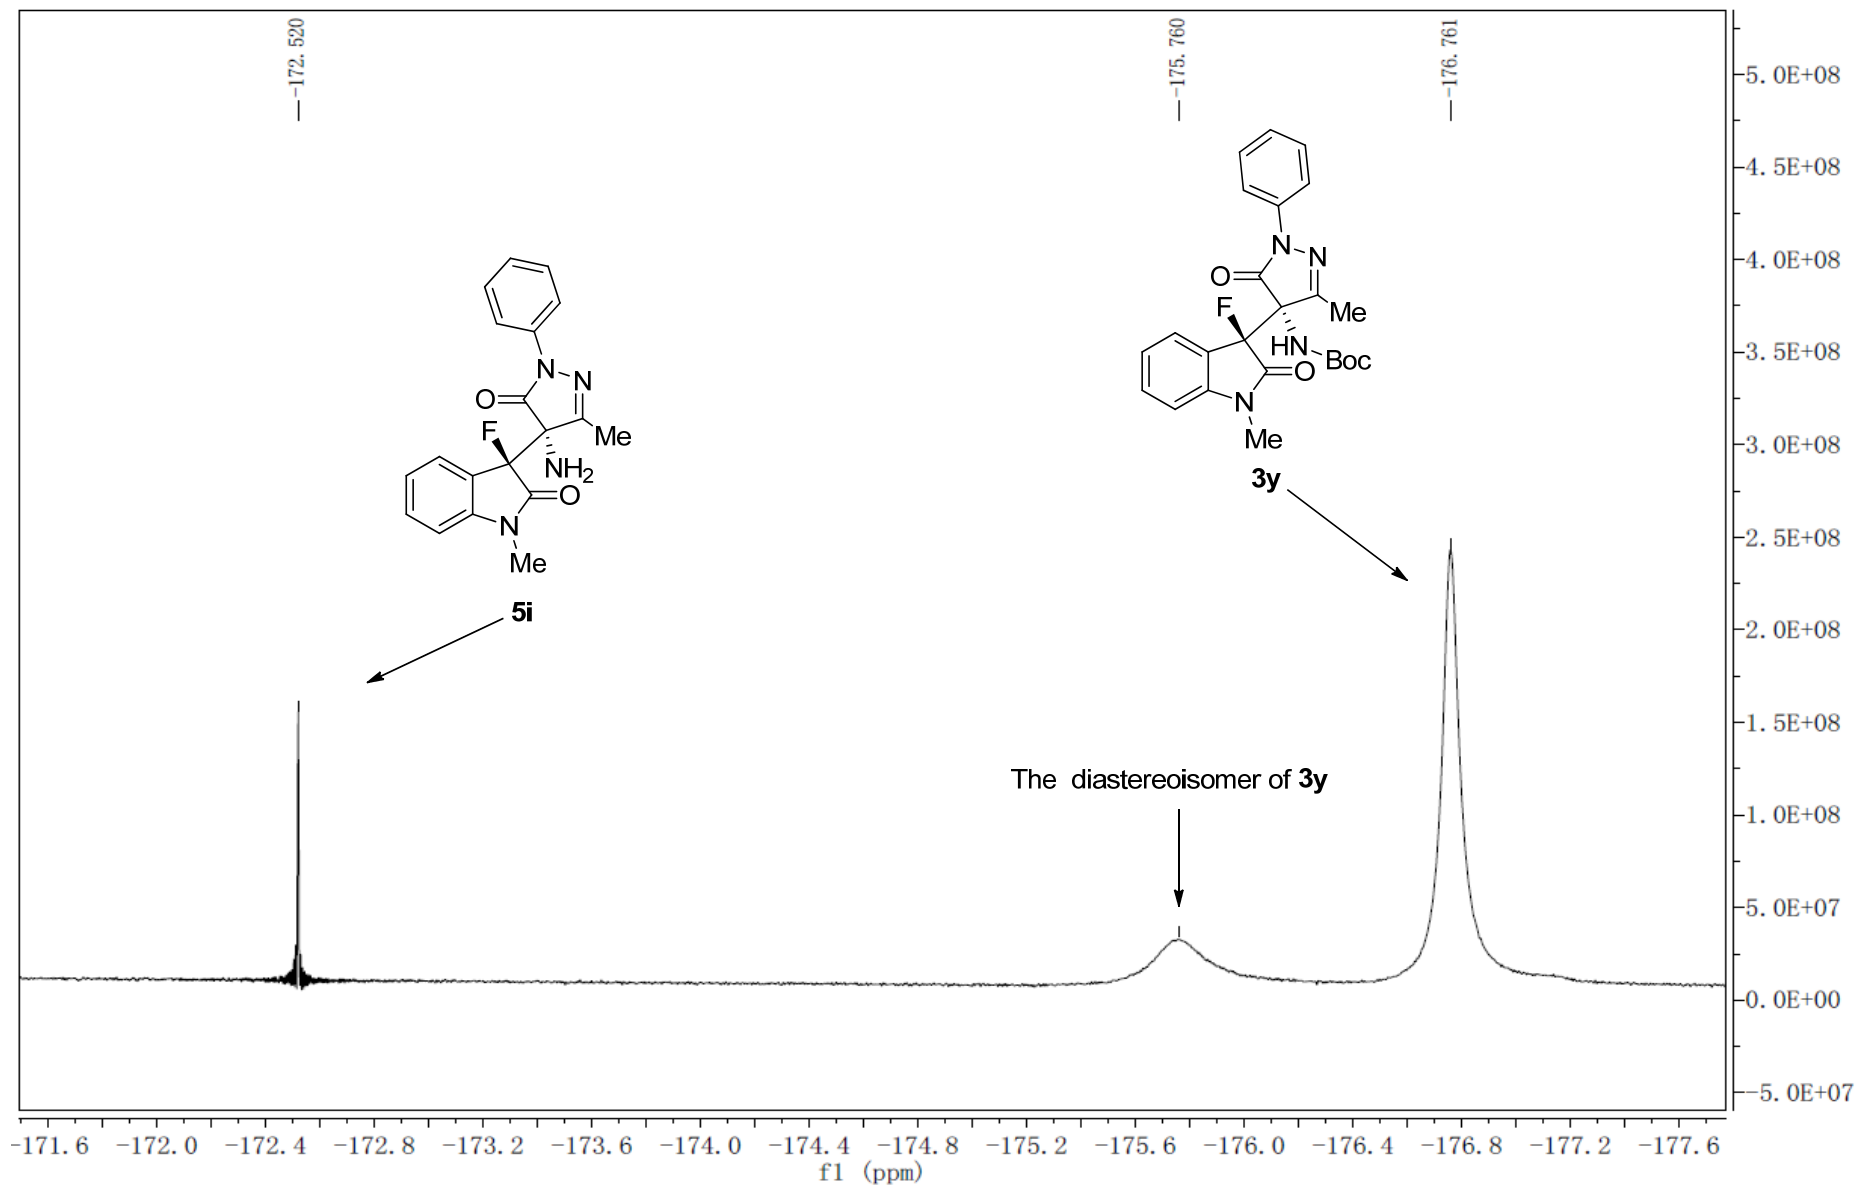

$^{19}\text{F}$  NMR (376 MHz)

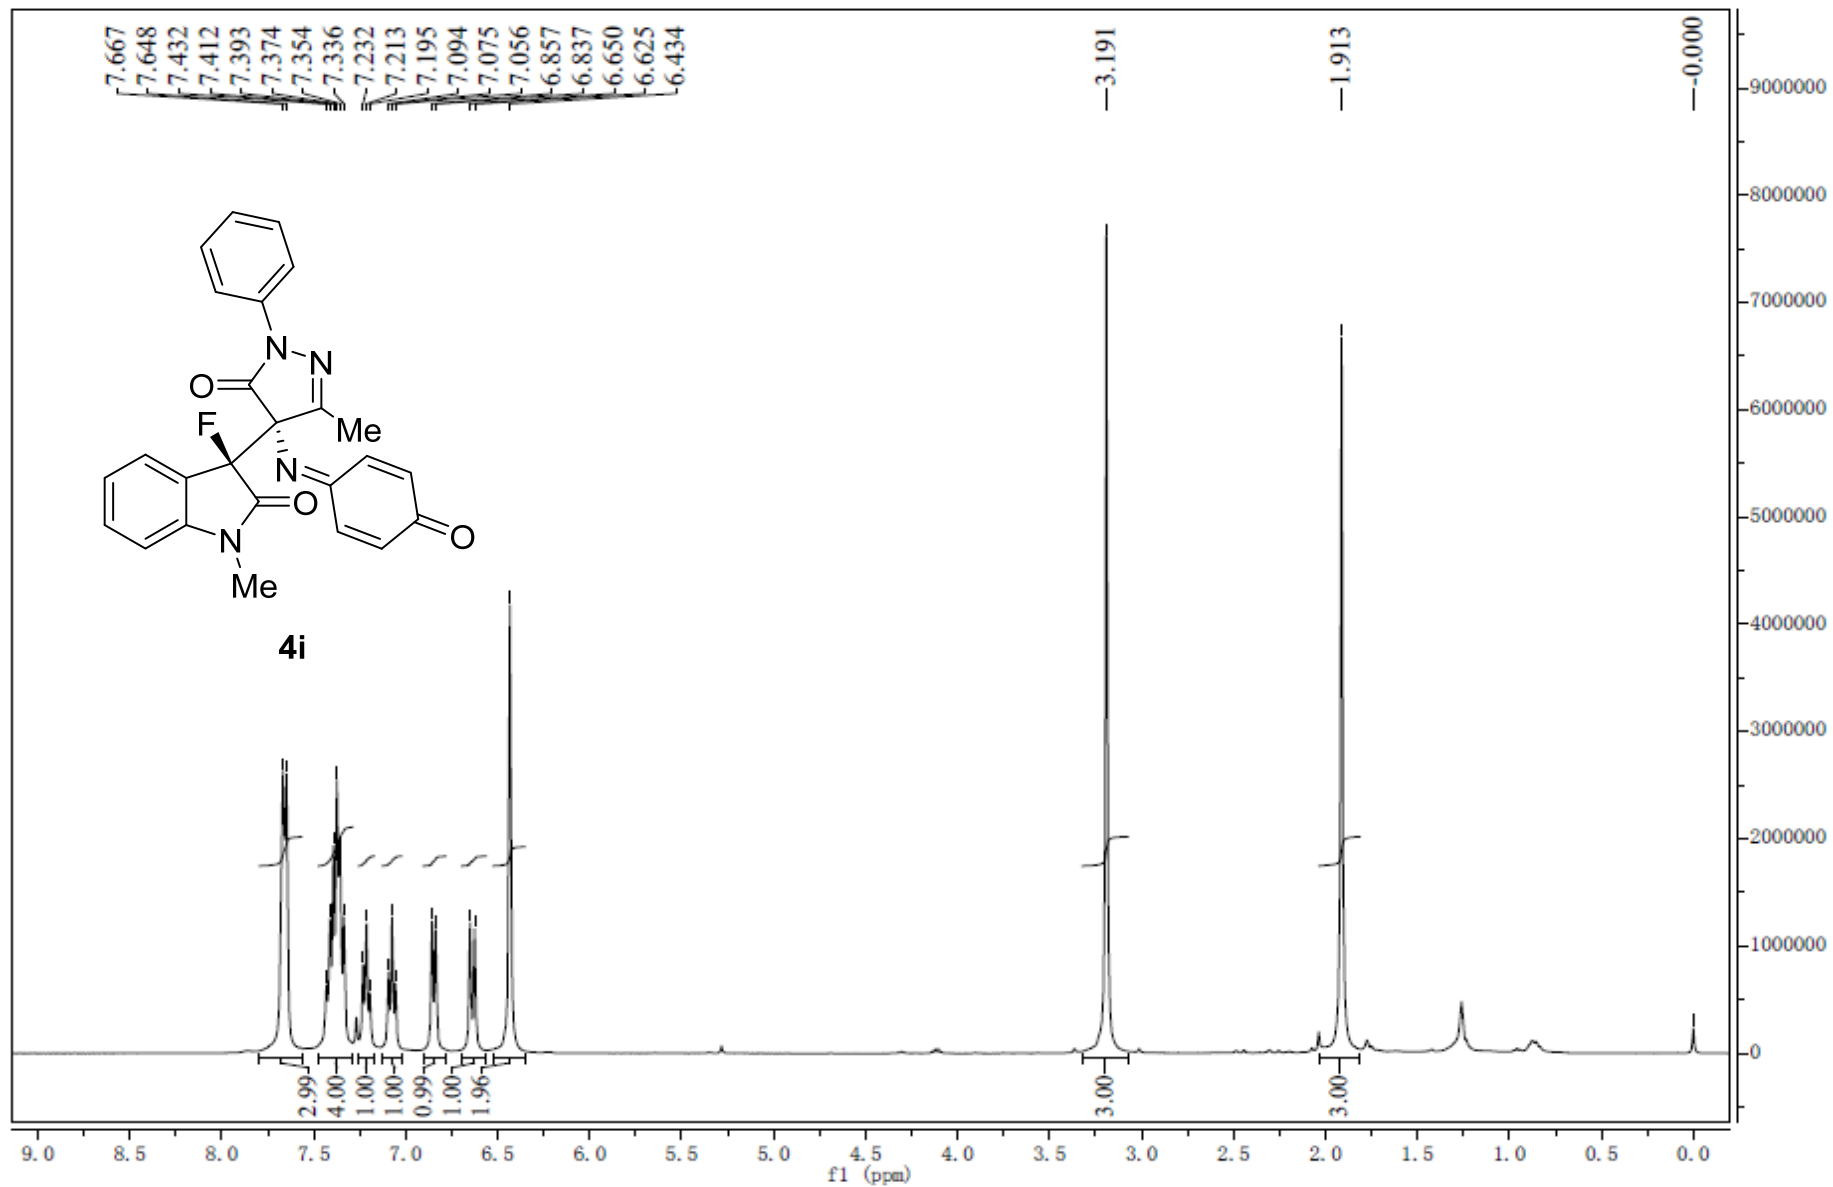

<sup>1</sup>H NMR (400 MHz)

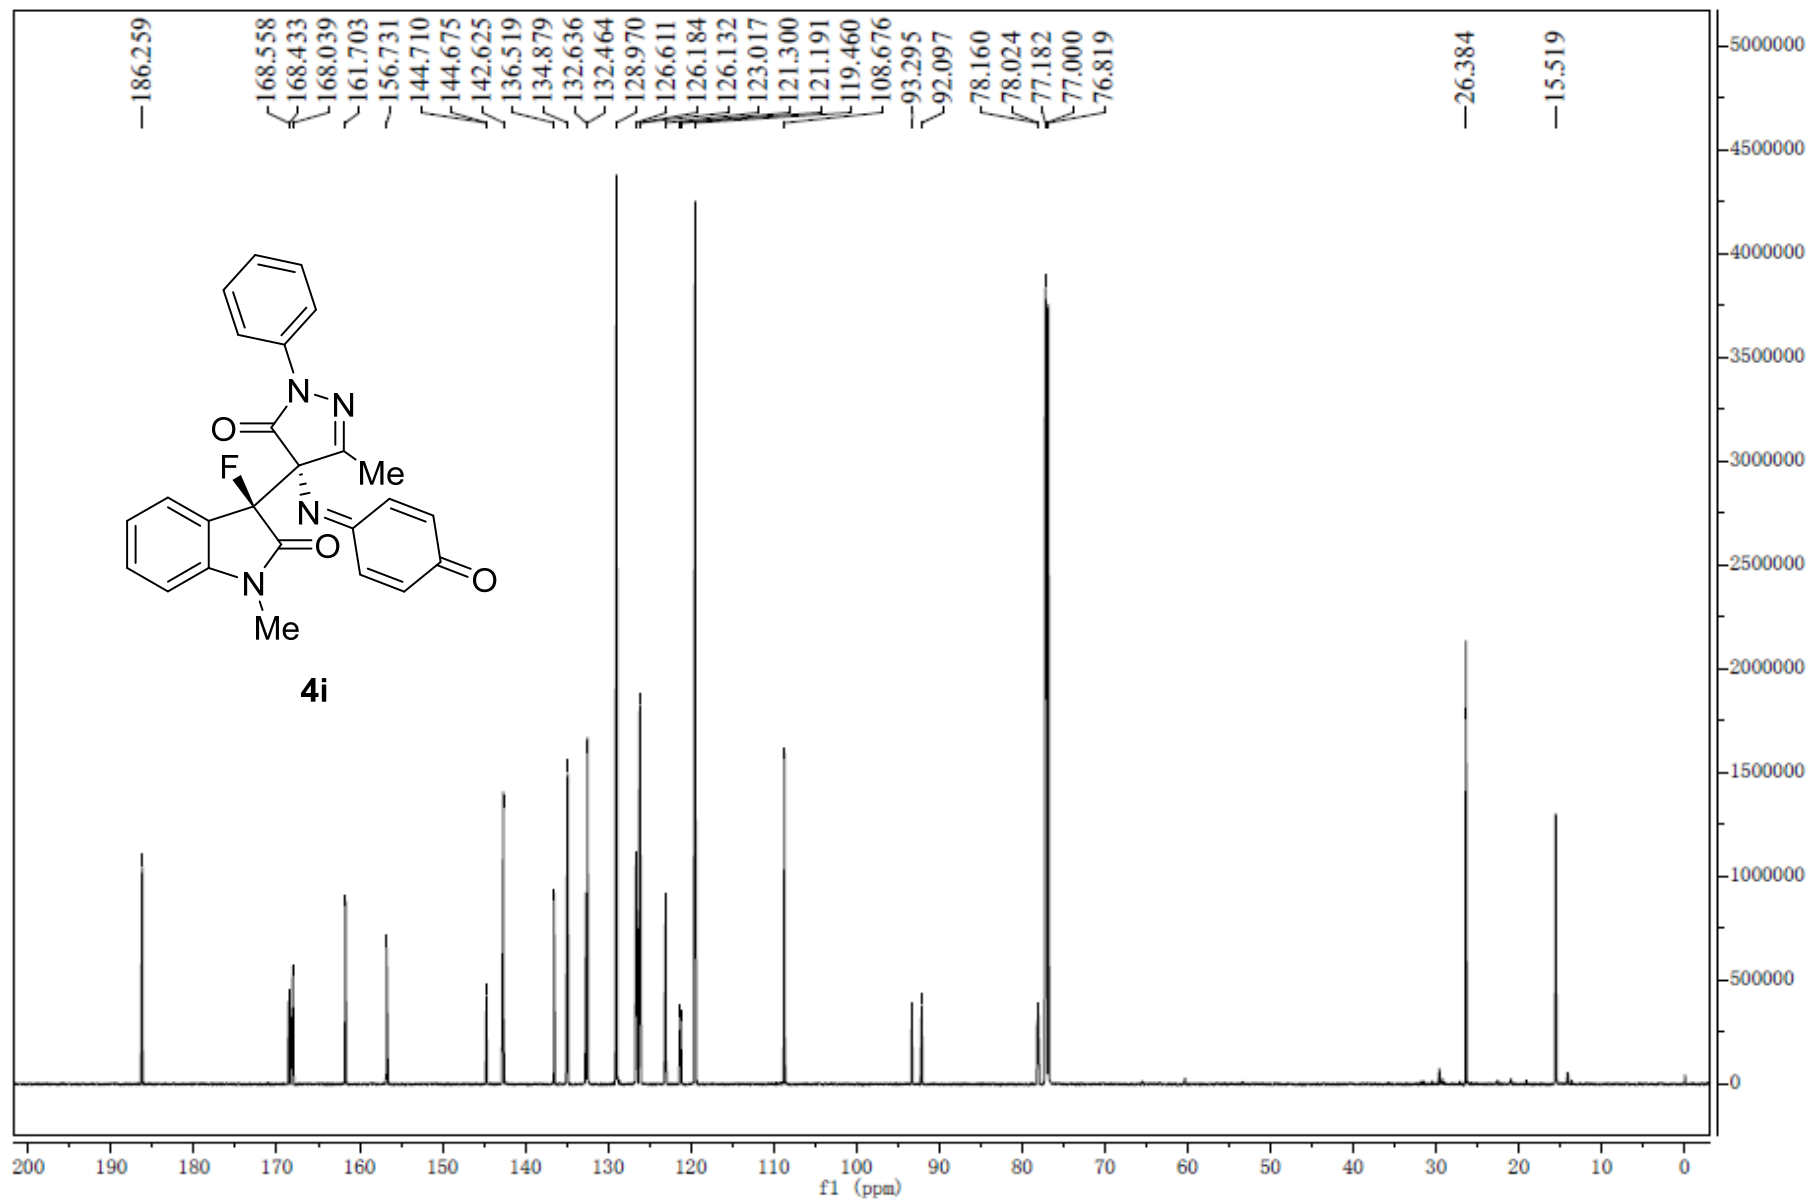

$^{13}\text{C}$  NMR (176 MHz)

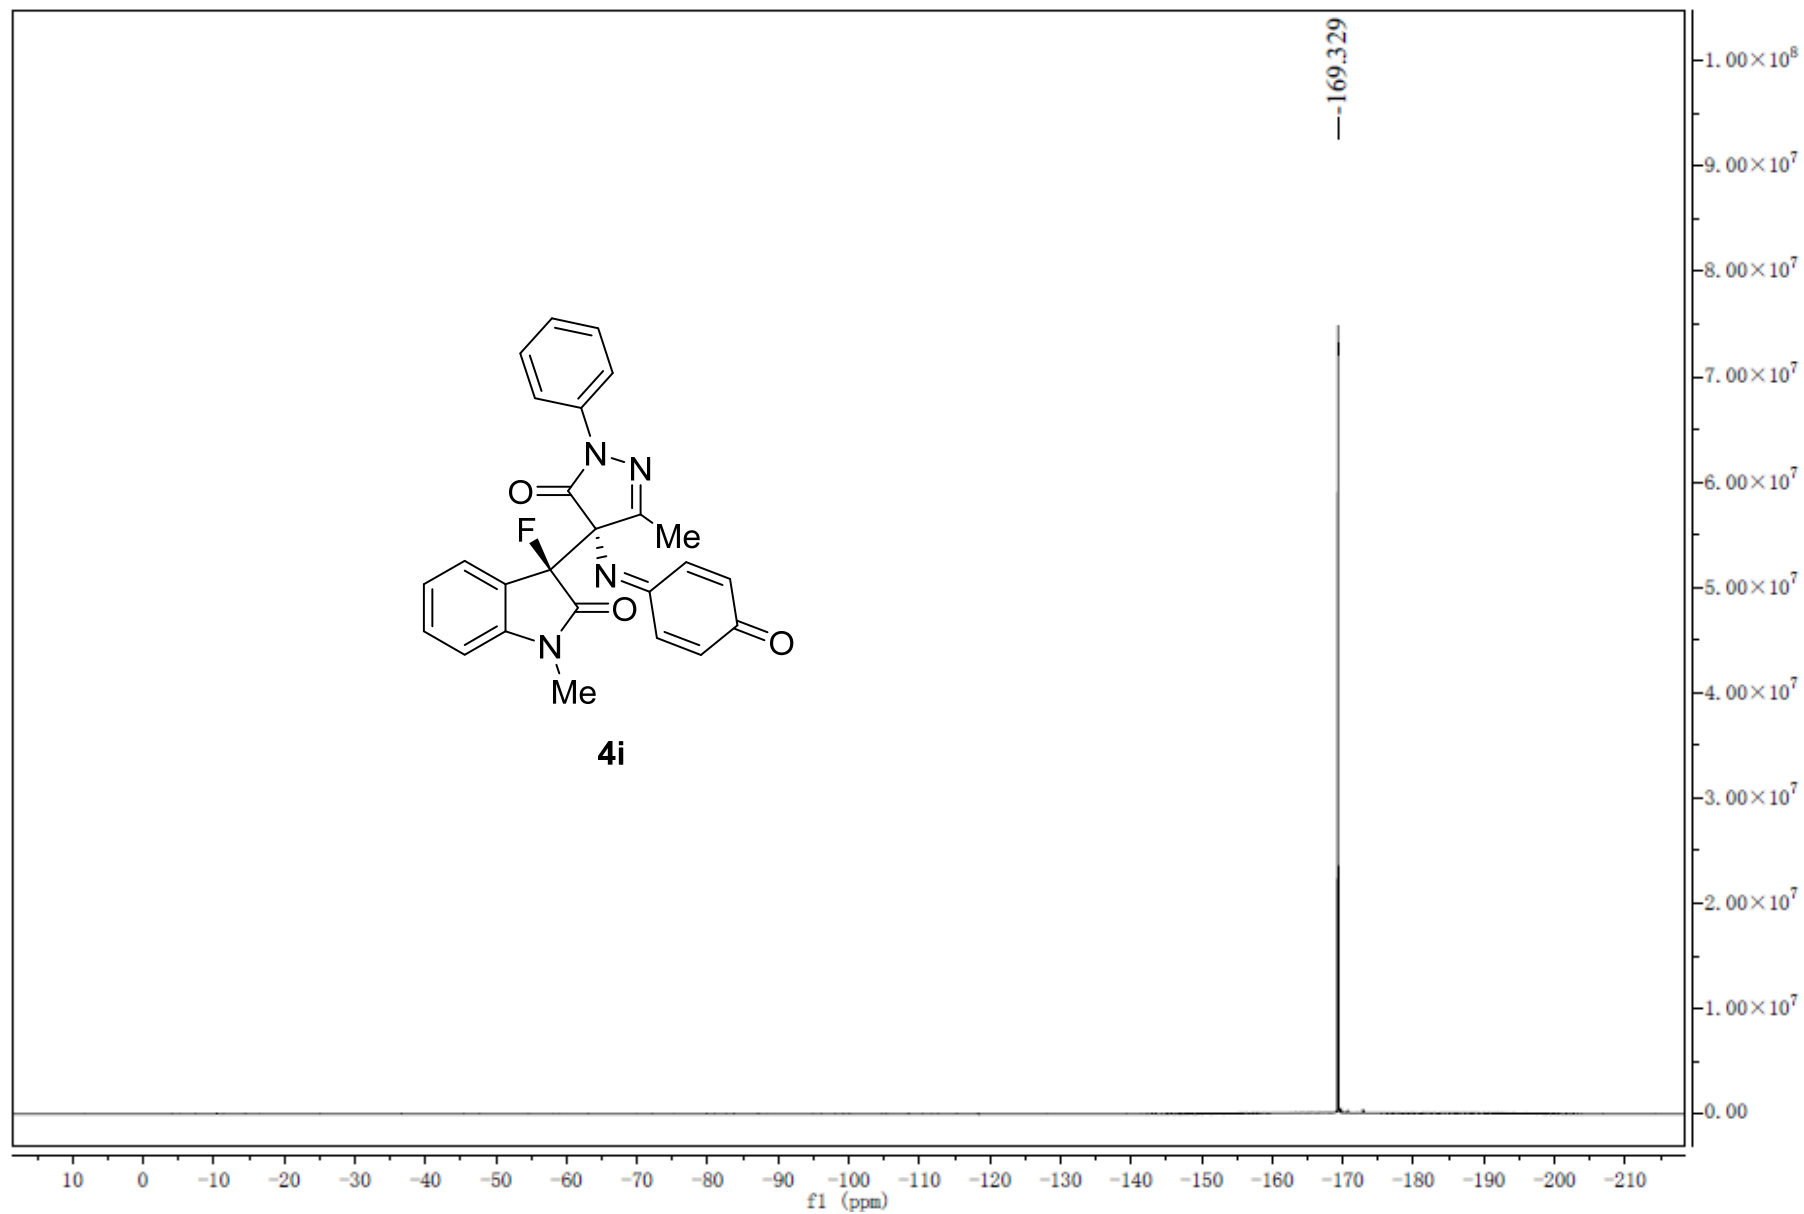

$^{19}\text{F}$  NMR (376 MHz)

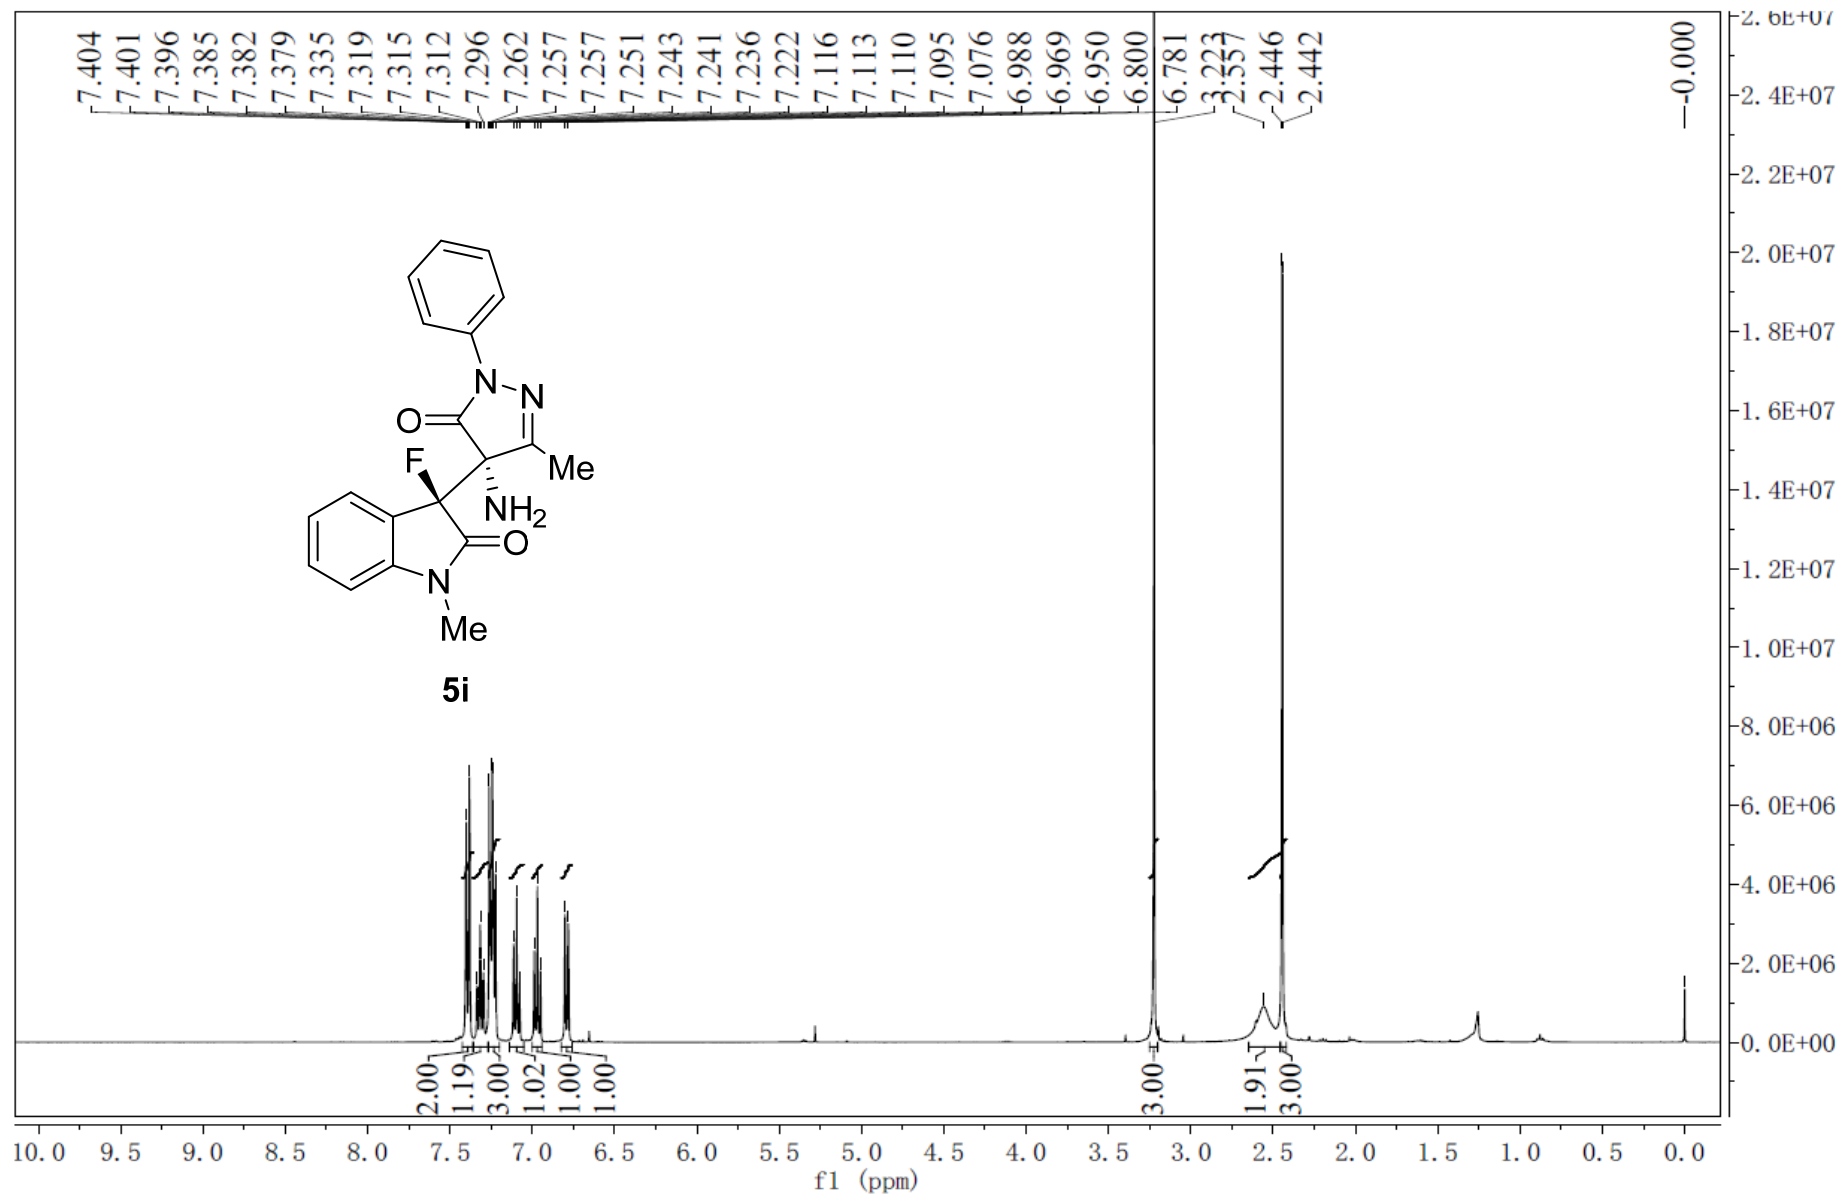

<sup>1</sup>H NMR (400 MHz)



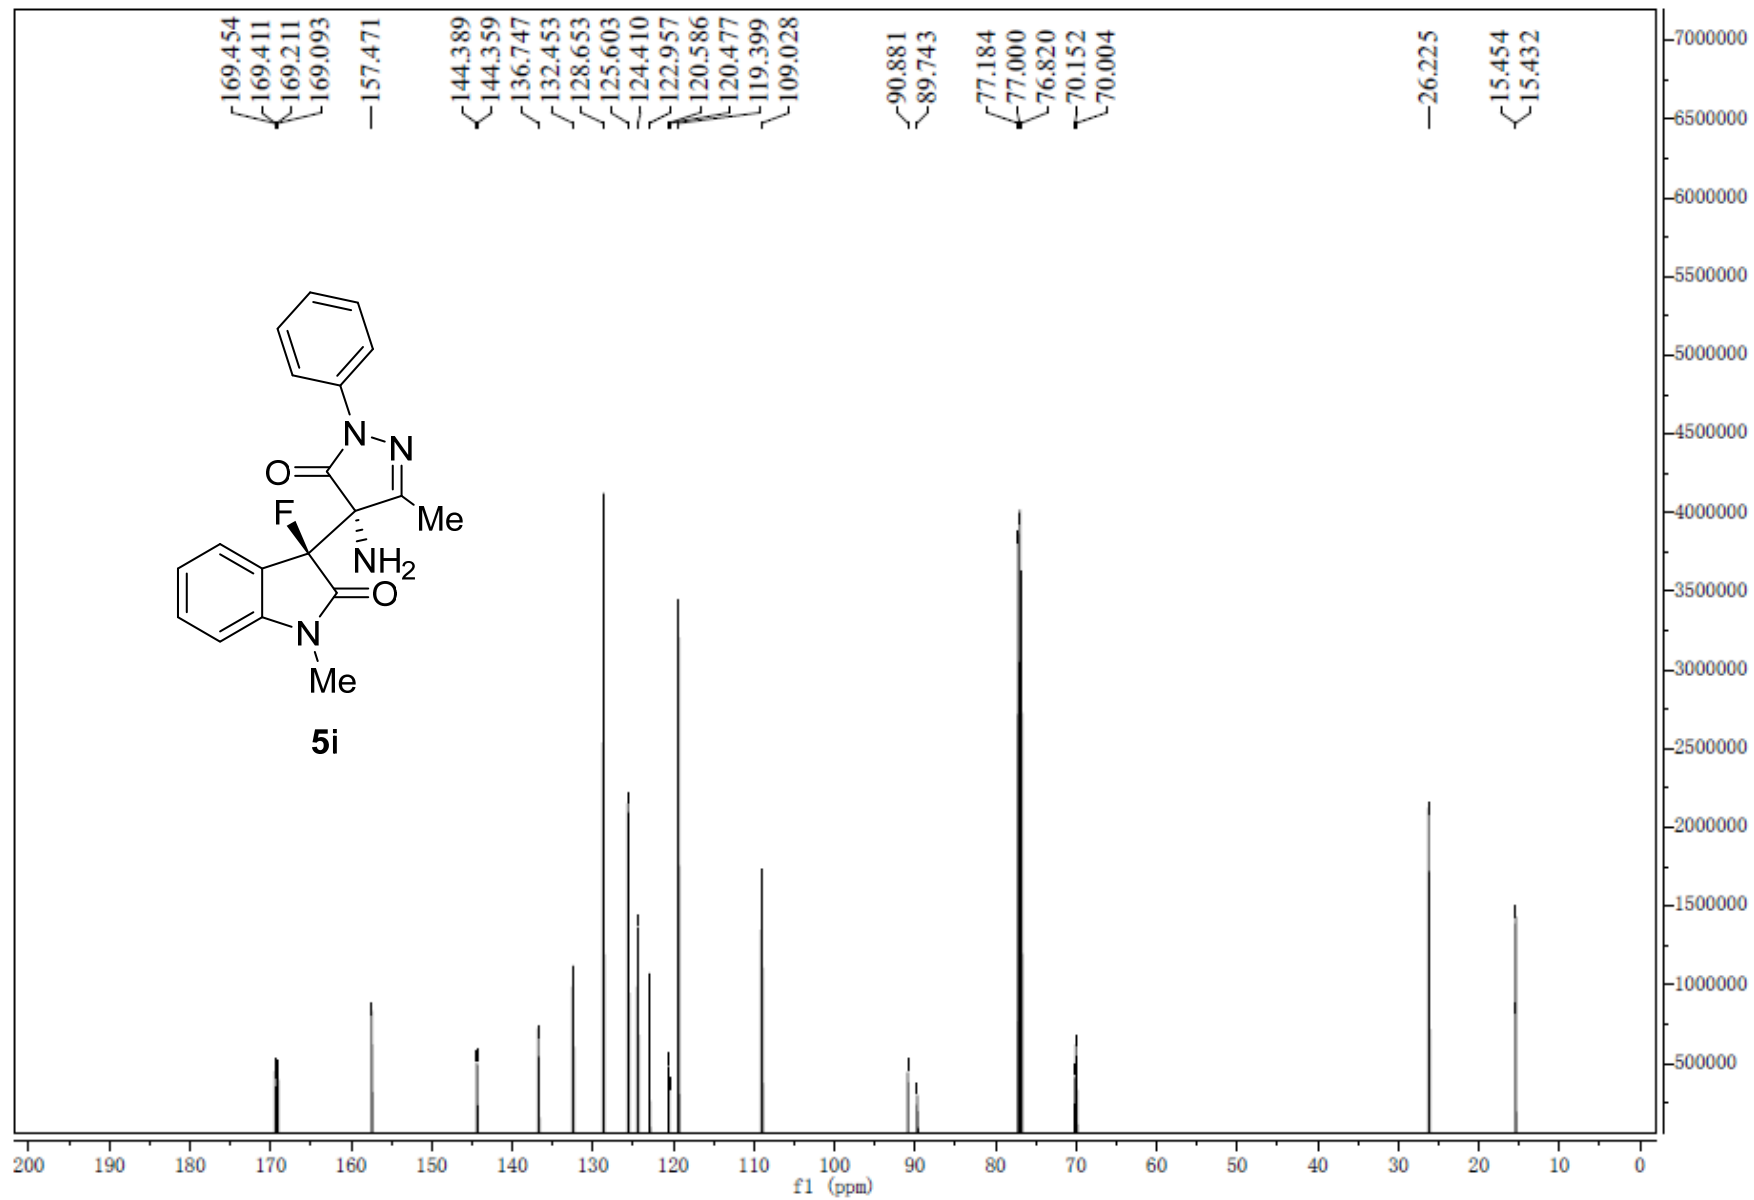

$^{13}\text{C}$  NMR (176 MHz)

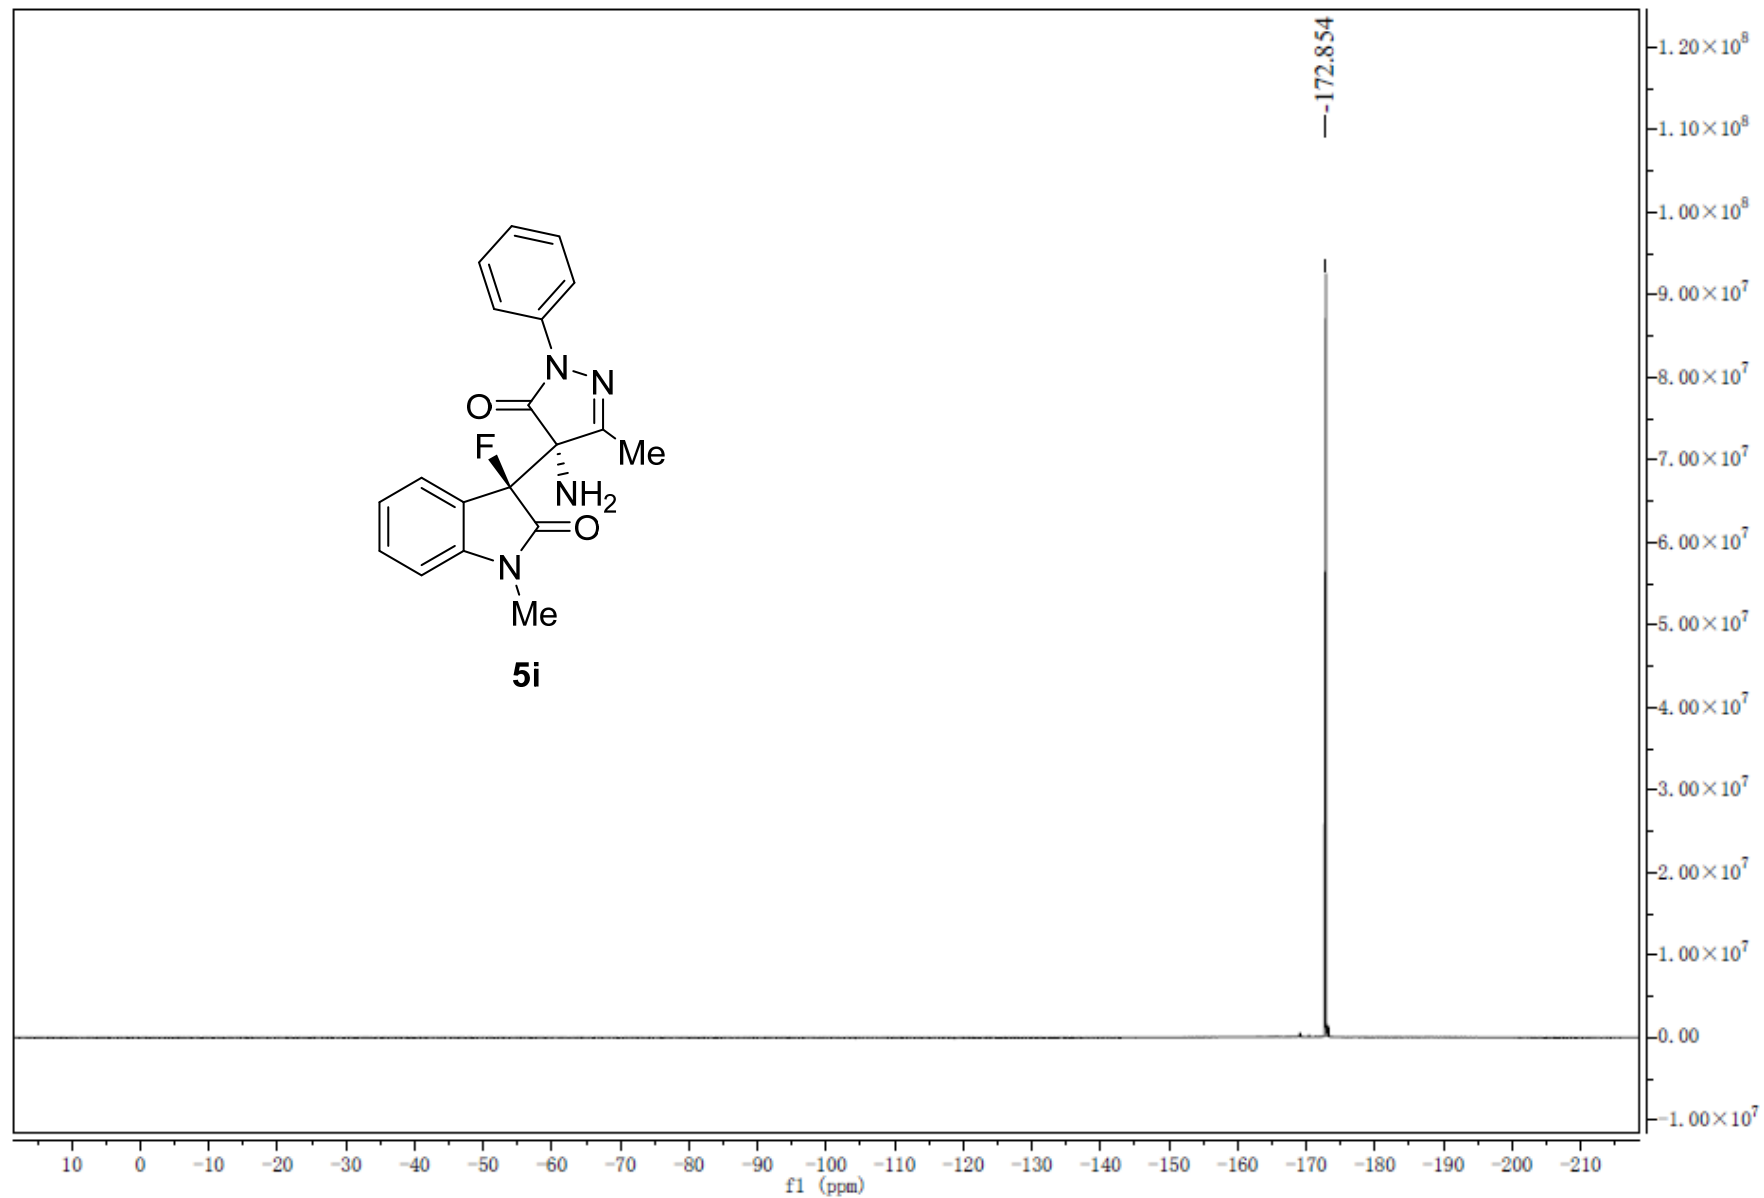

$^{19}\text{F}$  NMR (376 MHz)

#### 4. Copies of HPLC chromatograms of products

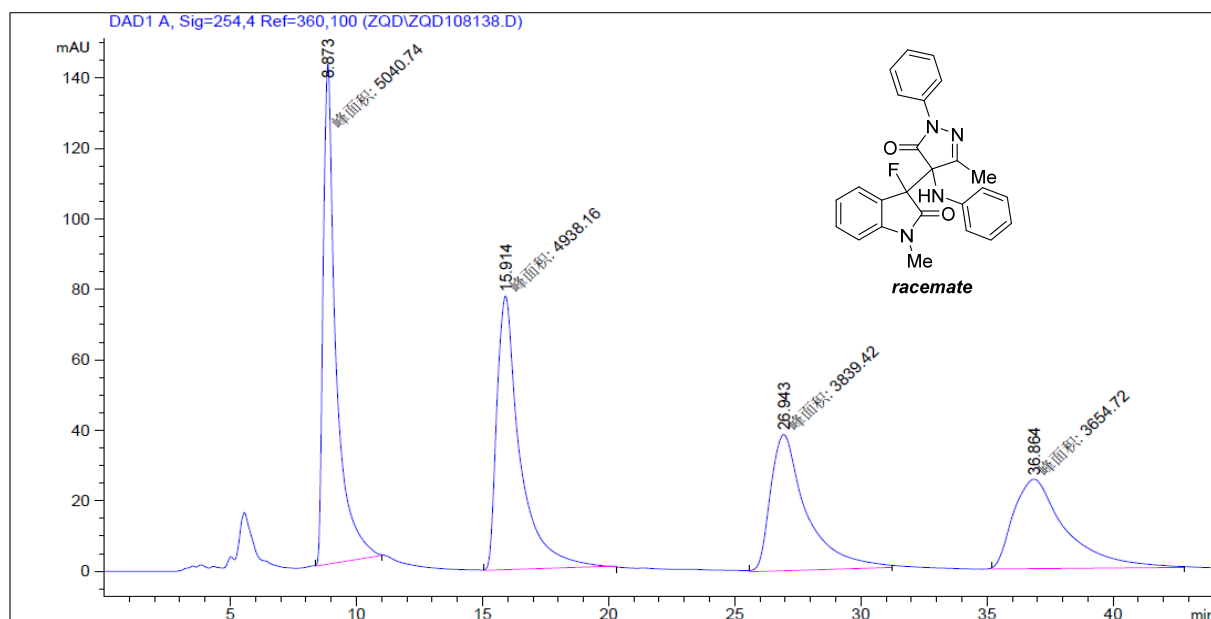

| Peak # | RetTime [min] | Type | Width [min] | Area [mAU*s] | Height [mAU] | Area %  |
|--------|---------------|------|-------------|--------------|--------------|---------|
| 1      | 8.873         | MM   | 0.5921      | 5040.73828   | 141.89995    | 28.8487 |
| 2      | 15.914        | MM   | 1.0596      | 4938.16113   | 77.67131     | 28.2616 |
| 3      | 26.943        | MM   | 1.6551      | 3839.41943   | 38.66217     | 21.9734 |
| 4      | 36.864        | MM   | 2.4032      | 3654.71680   | 25.34659     | 20.9163 |

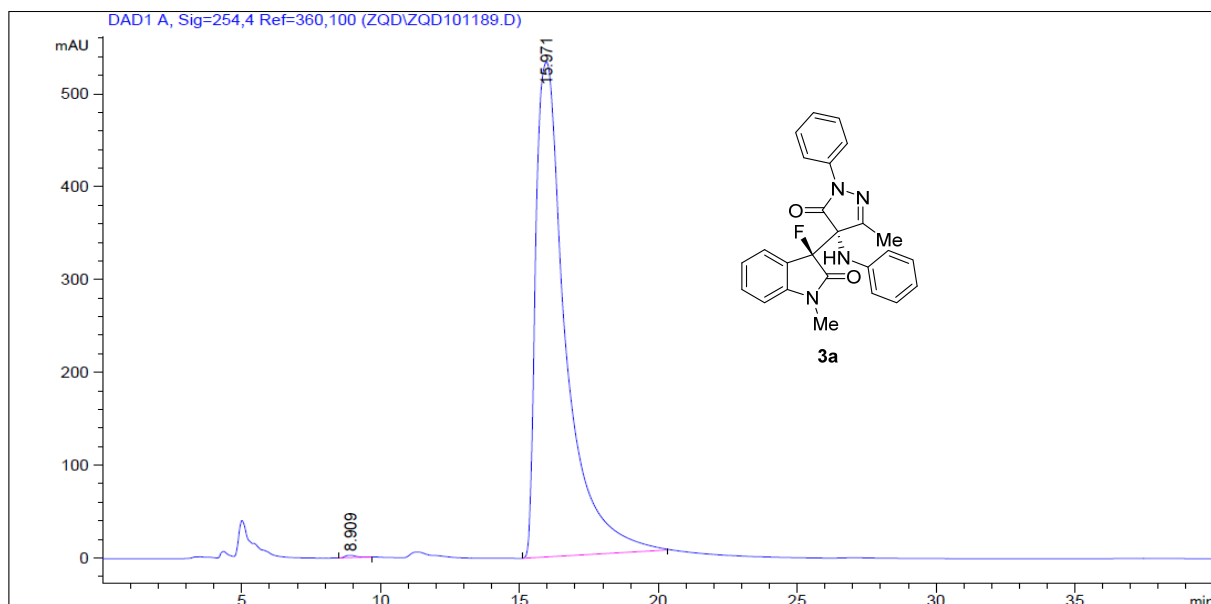

| Peak # | RetTime [min] | Type | Width [min] | Area [mAU*s] | Height [mAU] | Area %  |
|--------|---------------|------|-------------|--------------|--------------|---------|
| 1      | 8.909         | BB   | 0.3543      | 70.18701     | 2.35088      | 0.1754  |
| 2      | 15.971        | BB   | 1.1176      | 3.99395e4    | 533.37372    | 99.8246 |

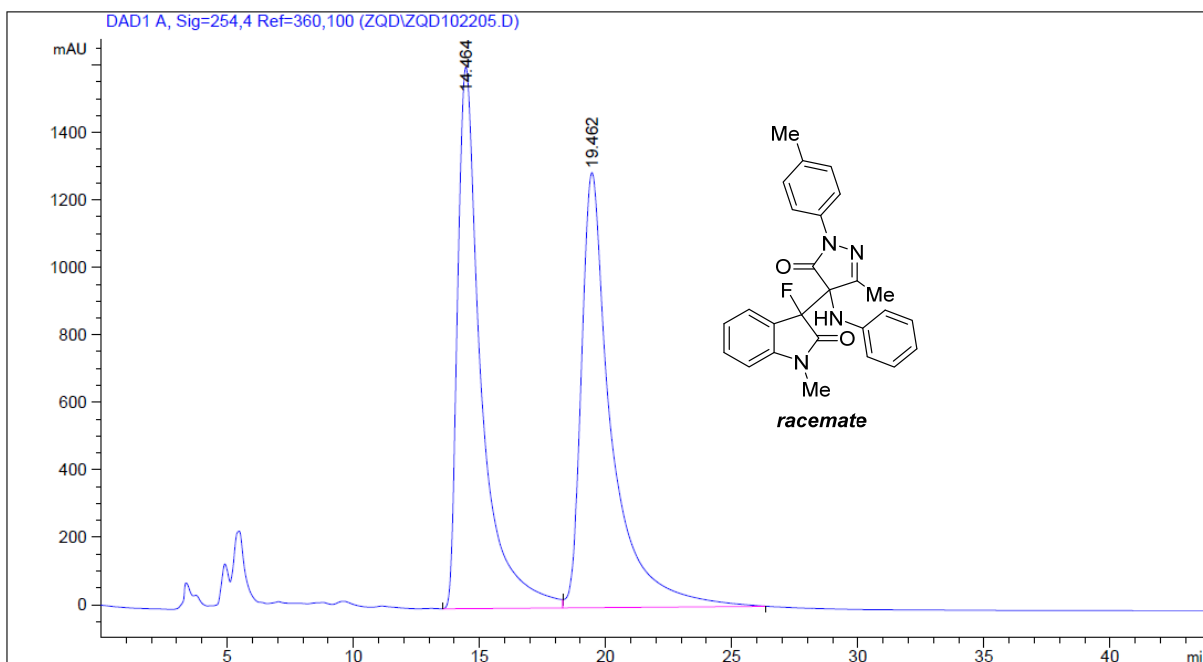

| Peak # | RetTime [min] | Type | Width [min] | Area [mAU*s] | Height [mAU] | Area %  |
|--------|---------------|------|-------------|--------------|--------------|---------|
| 1      | 14.464        | BB   | 0.9638      | 1.04534e5    | 1605.20154   | 49.4334 |
| 2      | 19.462        | BB   | 1.1893      | 1.06930e5    | 1289.69202   | 50.5666 |

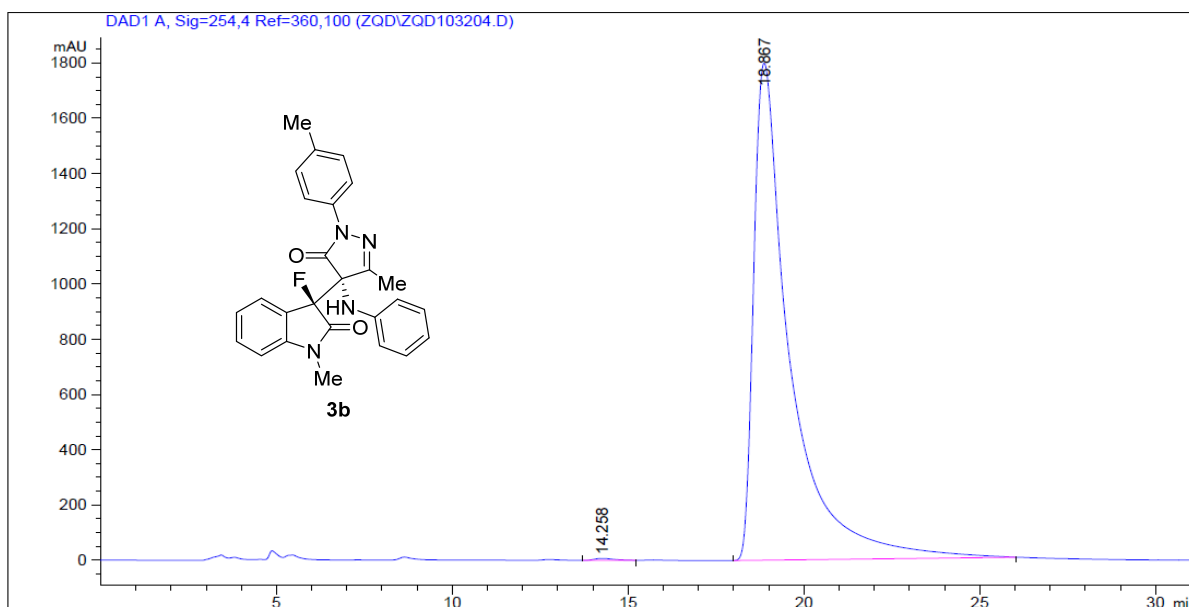

| Peak # | RetTime [min] | Type | Width [min] | Area [mAU*s] | Height [mAU] | Area %  |
|--------|---------------|------|-------------|--------------|--------------|---------|
| 1      | 14.258        | BB   | 0.5678      | 278.42581    | 7.19024      | 0.2131  |
| 2      | 18.867        | BB   | 1.0273      | 1.30399e5    | 1799.71021   | 99.7869 |

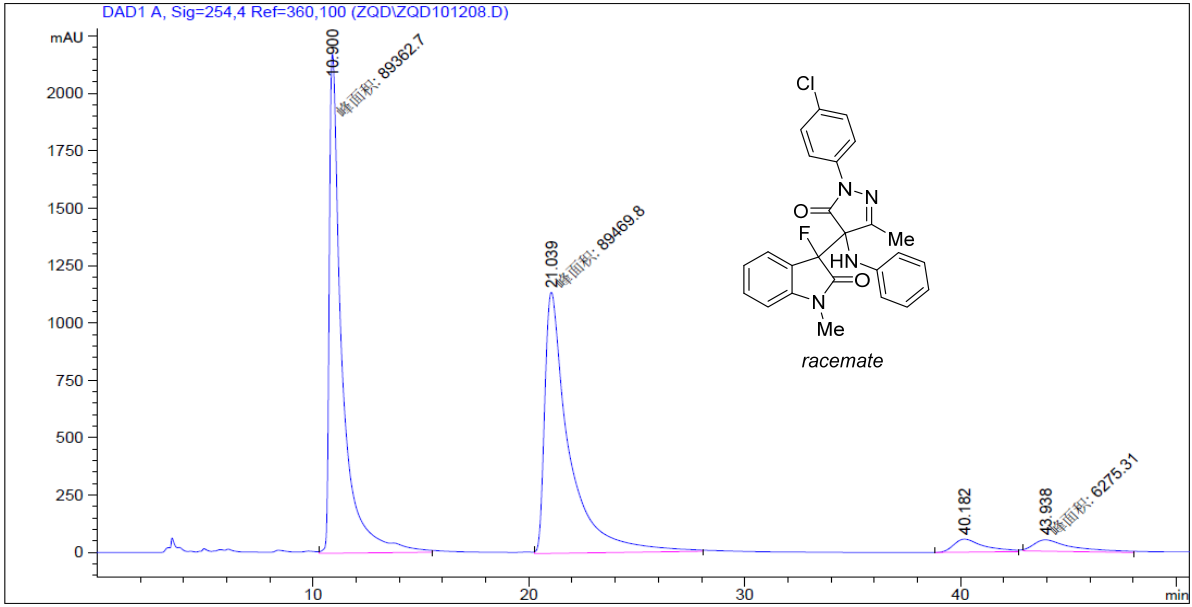

| Peak # | RetTime [min] | Type | Width [min] | Area [mAU*s] | Height [mAU] | Area %  |
|--------|---------------|------|-------------|--------------|--------------|---------|
| 1      | 10.900        | MM   | 0.6848      | 8.93627e4    | 2175.01904   | 46.8642 |
| 2      | 21.039        | MM   | 1.3104      | 8.94697e4    | 1137.94421   | 46.9204 |
| 3      | 40.182        | BB   | 1.3971      | 5576.49316   | 56.91363     | 2.9245  |
| 4      | 43.938        | MM   | 2.1108      | 6275.31152   | 49.55000     | 3.2909  |

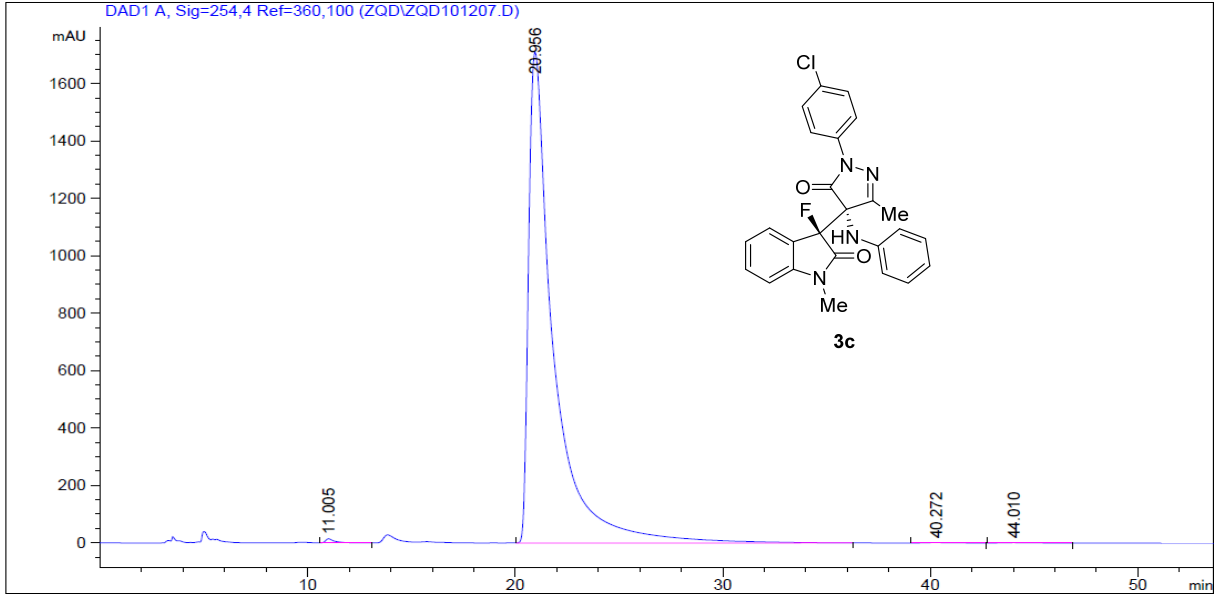

| Peak # | RetTime [min] | Type | Width [min] | Area [mAU*s] | Height [mAU] | Area %  |
|--------|---------------|------|-------------|--------------|--------------|---------|
| 1      | 11.005        | VB   | 0.4748      | 506.68384    | 14.82362     | 0.3495  |
| 2      | 20.956        | VB   | 1.1955      | 1.44136e5    | 1709.79968   | 99.4348 |
| 3      | 40.272        | BB   | 1.1332      | 150.14992    | 1.63840      | 0.1036  |
| 4      | 44.010        | BB   | 1.3212      | 162.51303    | 1.54753      | 0.1121  |

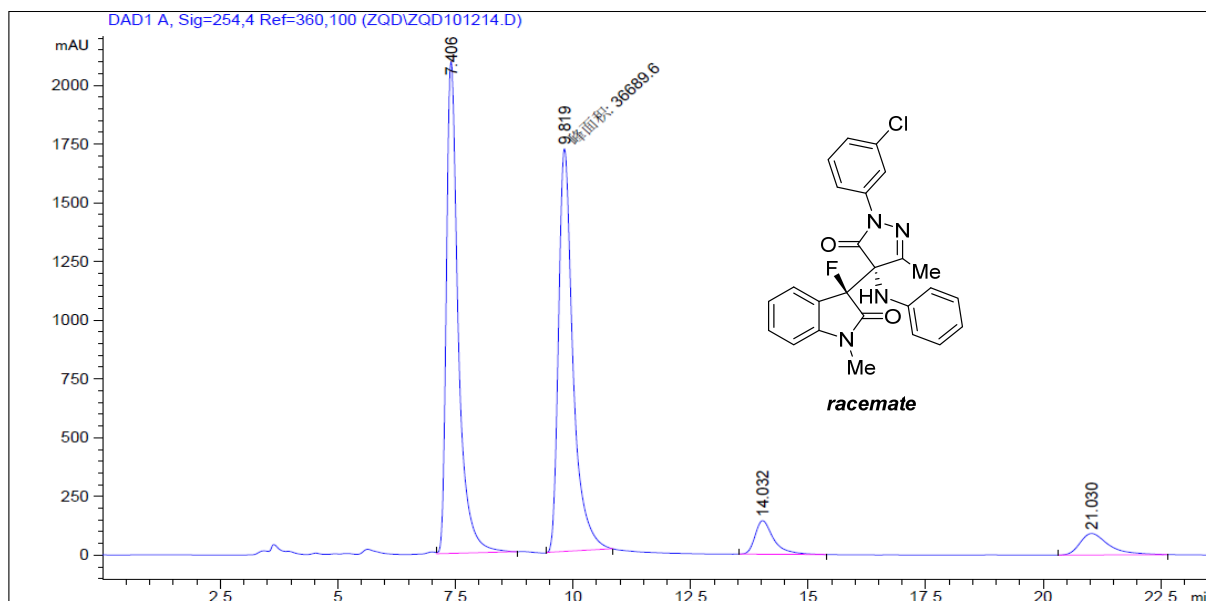

| Peak # | RetTime [min] | Type | Width [min] | Area [mAU*s] | Height [mAU] | Area %  |
|--------|---------------|------|-------------|--------------|--------------|---------|
| 1      | 7.406         | VB   | 0.2640      | 3.69661e4    | 2093.37915   | 45.3552 |
| 2      | 9.819         | MM   | 0.3568      | 3.66896e4    | 1713.91394   | 45.0160 |
| 3      | 14.032        | BB   | 0.4120      | 3946.61157   | 143.01100    | 4.8423  |
| 4      | 21.030        | BB   | 0.6426      | 3901.19507   | 91.27499     | 4.7865  |

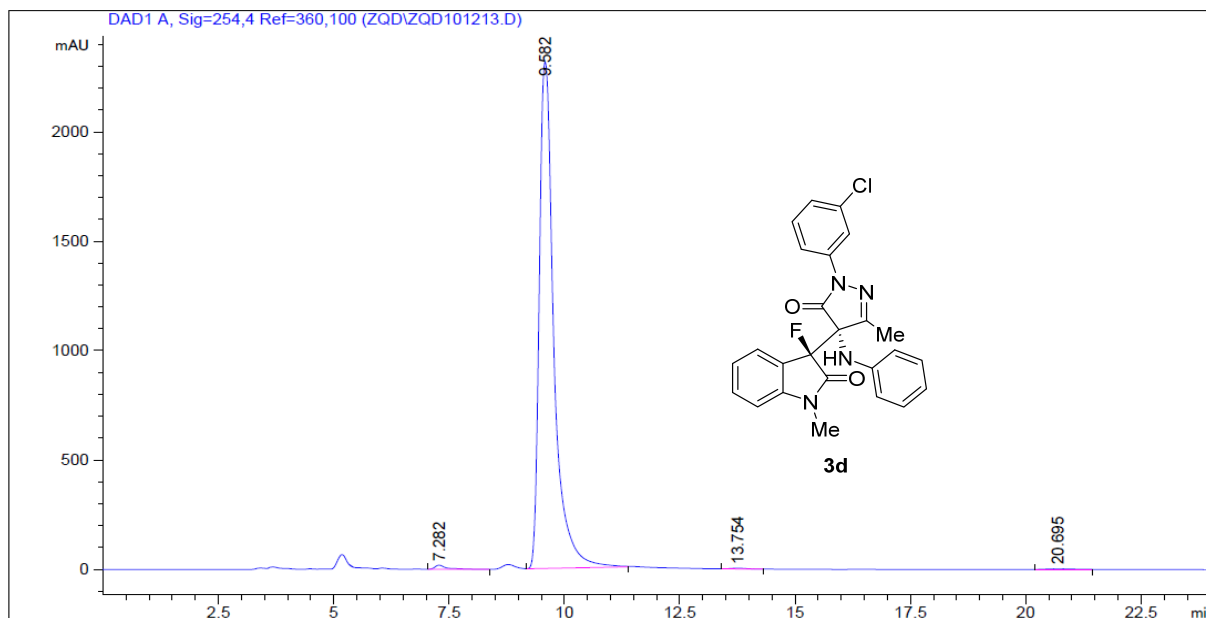

| Peak # | RetTime [min] | Type | Width [min] | Area [mAU*s] | Height [mAU] | Area %  |
|--------|---------------|------|-------------|--------------|--------------|---------|
| 1      | 7.282         | BV   | 0.2532      | 336.53128    | 19.13636     | 0.6546  |
| 2      | 9.582         | VB   | 0.3306      | 5.09015e4    | 2313.86938   | 99.0066 |
| 3      | 13.754        | BB   | 0.3337      | 71.97612     | 3.20918      | 0.1400  |
| 4      | 20.695        | BB   | 0.4916      | 102.20467    | 2.77572      | 0.1988  |

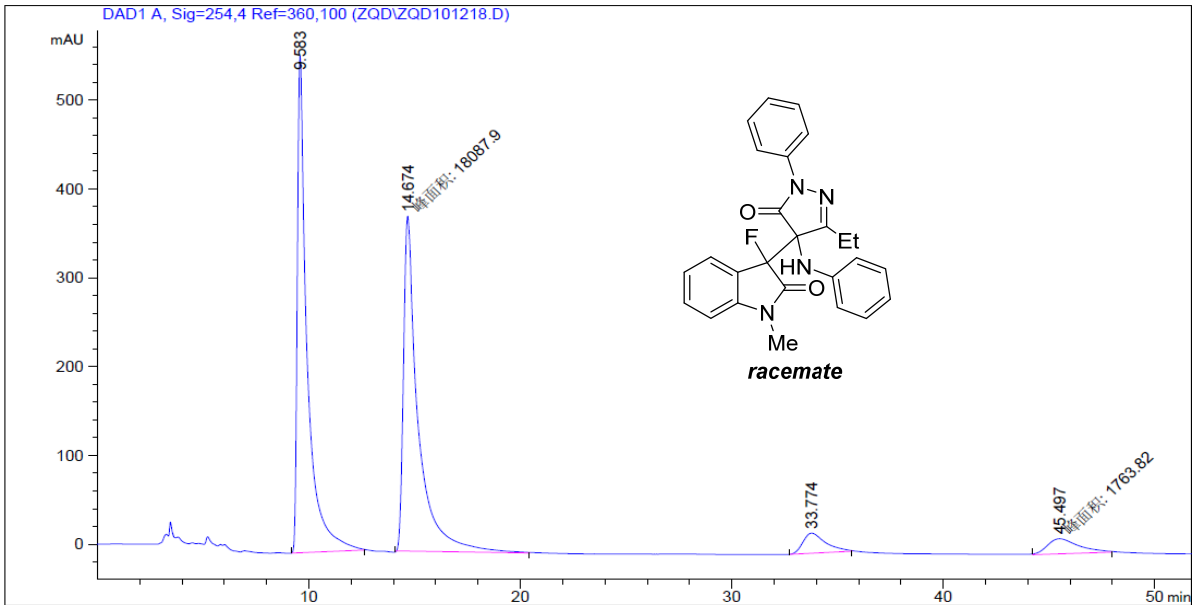

| Peak # | RetTime [min] | Type | Width [min] | Area [mAU*s] | Height [mAU] | Area %  |
|--------|---------------|------|-------------|--------------|--------------|---------|
| 1      | 9.583         | BB   | 0.4529      | 1.81558e4    | 559.10504    | 45.7360 |
| 2      | 14.674        | MM   | 0.7995      | 1.80879e4    | 377.09079    | 45.5652 |
| 3      | 33.774        | BB   | 1.0907      | 1689.34192   | 22.58285     | 4.2556  |
| 4      | 45.497        | MM   | 1.7254      | 1763.82019   | 17.03795     | 4.4432  |

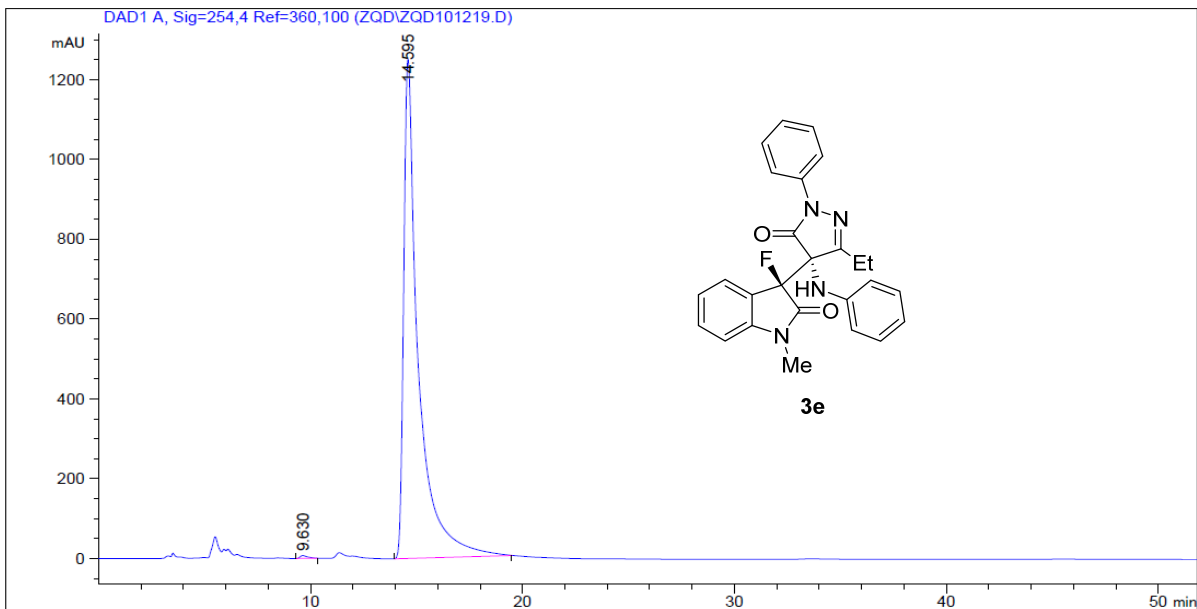

| Peak # | RetTime [min] | Type | Width [min] | Area [mAU*s] | Height [mAU] | Area %  |
|--------|---------------|------|-------------|--------------|--------------|---------|
| 1      | 9.630         | BB   | 0.3560      | 180.88950    | 7.27824      | 0.2993  |
| 2      | 14.595        | BB   | 0.6742      | 6.02471e4    | 1250.31116   | 99.7007 |

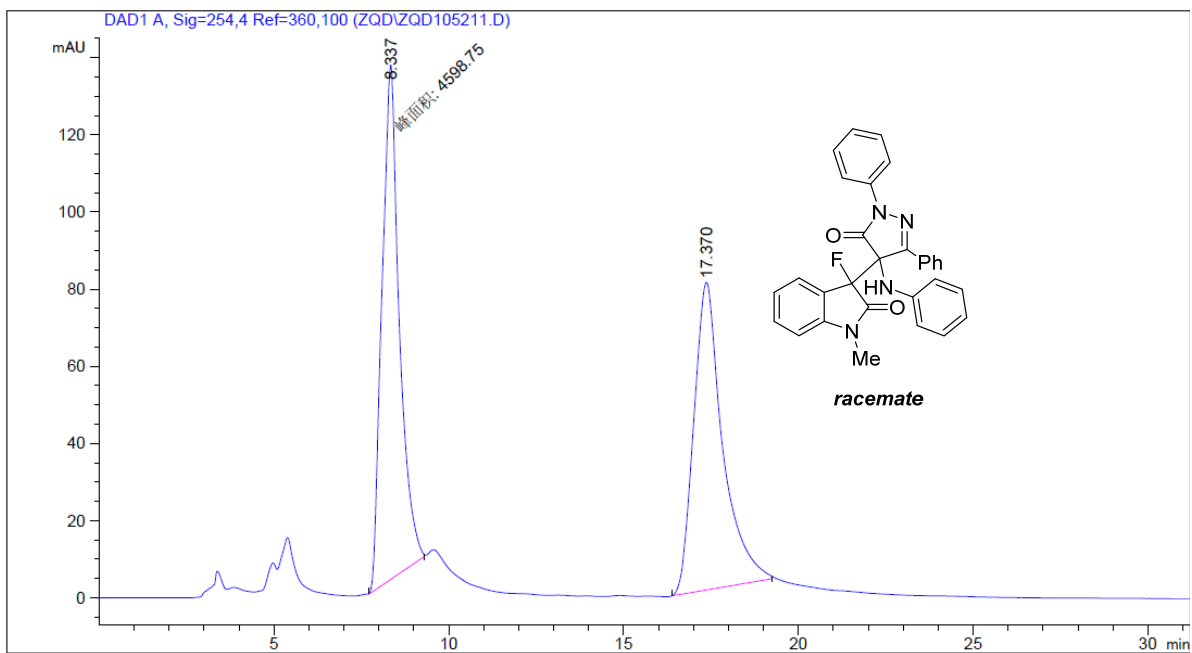

| Peak # | RetTime [min] | Type | Width [min] | Area [mAU*s] | Height [mAU] | Area %  |
|--------|---------------|------|-------------|--------------|--------------|---------|
| 1      | 8.337         | MM   | 0.5746      | 4598.74902   | 133.38606    | 50.1886 |
| 2      | 17.370        | BB   | 0.8360      | 4564.19531   | 79.71053     | 49.8114 |

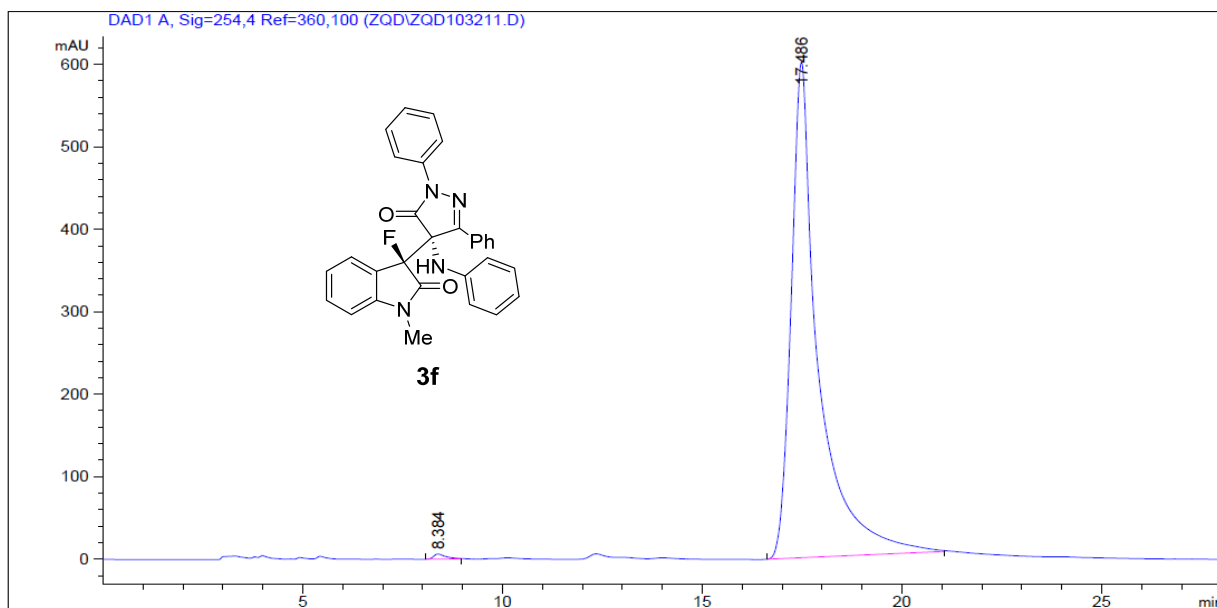

| Peak # | RetTime [min] | Type | Width [min] | Area [mAU*s] | Height [mAU] | Area %  |
|--------|---------------|------|-------------|--------------|--------------|---------|
| 1      | 8.384         | BB   | 0.3070      | 135.01965    | 6.22742      | 0.4706  |
| 2      | 17.486        | BB   | 0.6540      | 2.85536e4    | 601.28241    | 99.5294 |



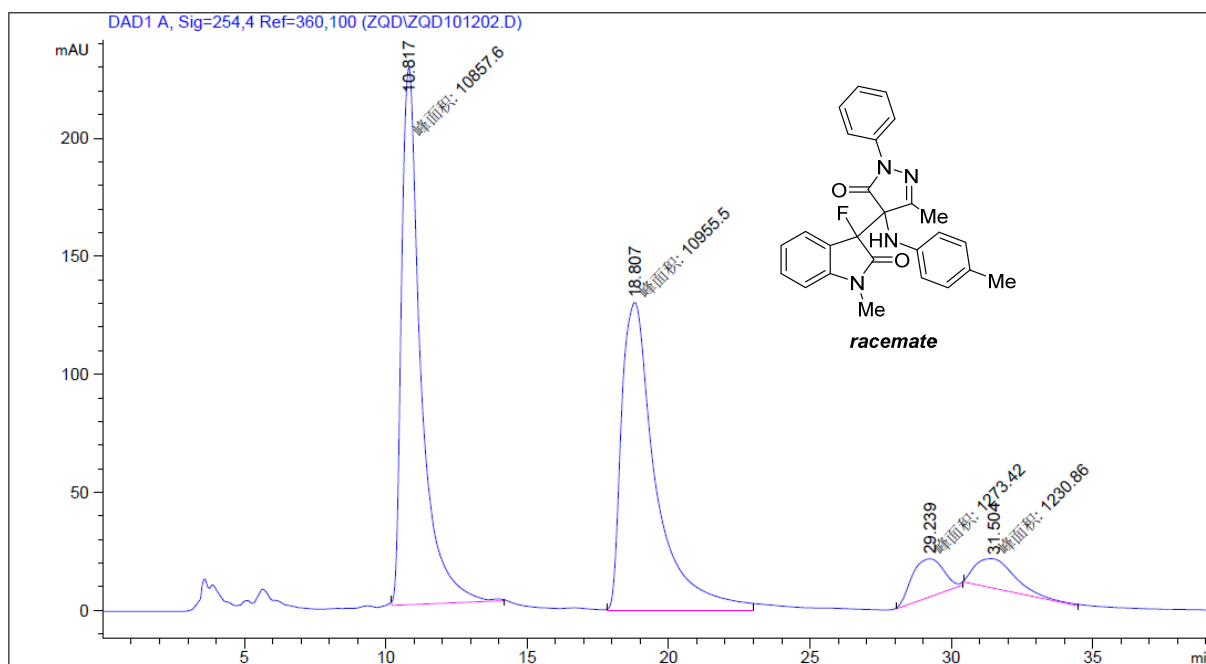

| Peak # | RetTime [min] | Type | Width [min] | Area [mAU*s] | Height [mAU] | Area %  |
|--------|---------------|------|-------------|--------------|--------------|---------|
| 1      | 10.817        | MM   | 0.7960      | 1.08576e4    | 227.33813    | 44.6497 |
| 2      | 18.807        | MM   | 1.4015      | 1.09555e4    | 130.27798    | 45.0520 |
| 3      | 29.239        | MM   | 1.3184      | 1273.42004   | 16.09828     | 5.2367  |
| 4      | 31.504        | MM   | 1.6482      | 1230.86389   | 12.44635     | 5.0617  |

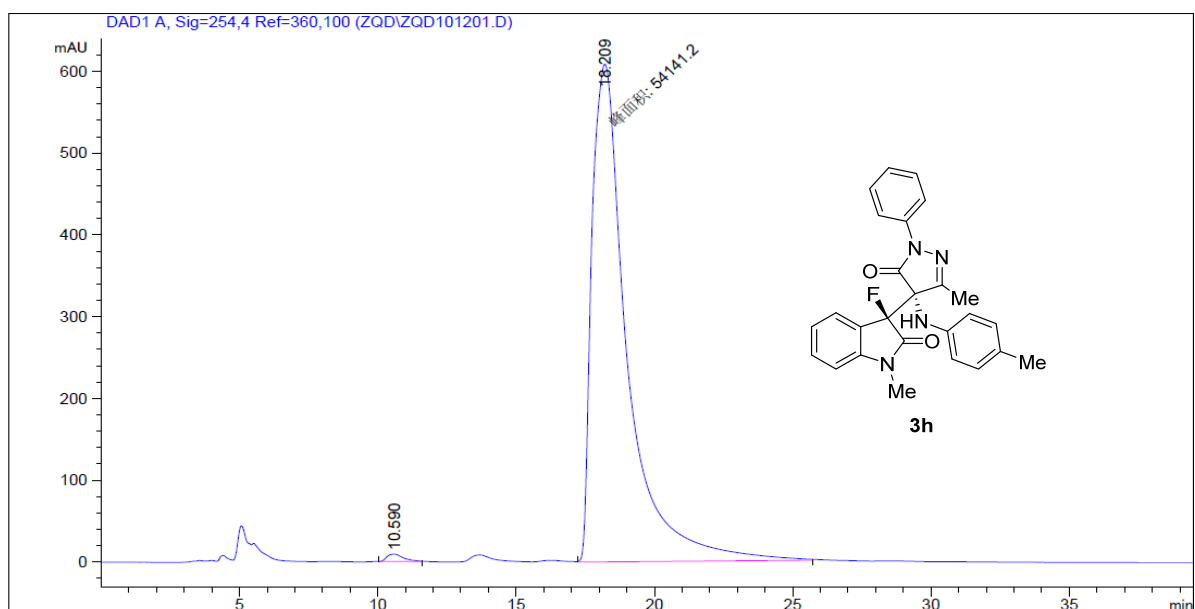

| Peak # | RetTime [min] | Type | Width [min] | Area [mAU*s] | Height [mAU] | Area %  |
|--------|---------------|------|-------------|--------------|--------------|---------|
| 1      | 10.590        | BB   | 0.6218      | 367.08743    | 8.96258      | 0.6735  |
| 2      | 18.209        | MM   | 1.4825      | 5.41412e4    | 608.66223    | 99.3265 |

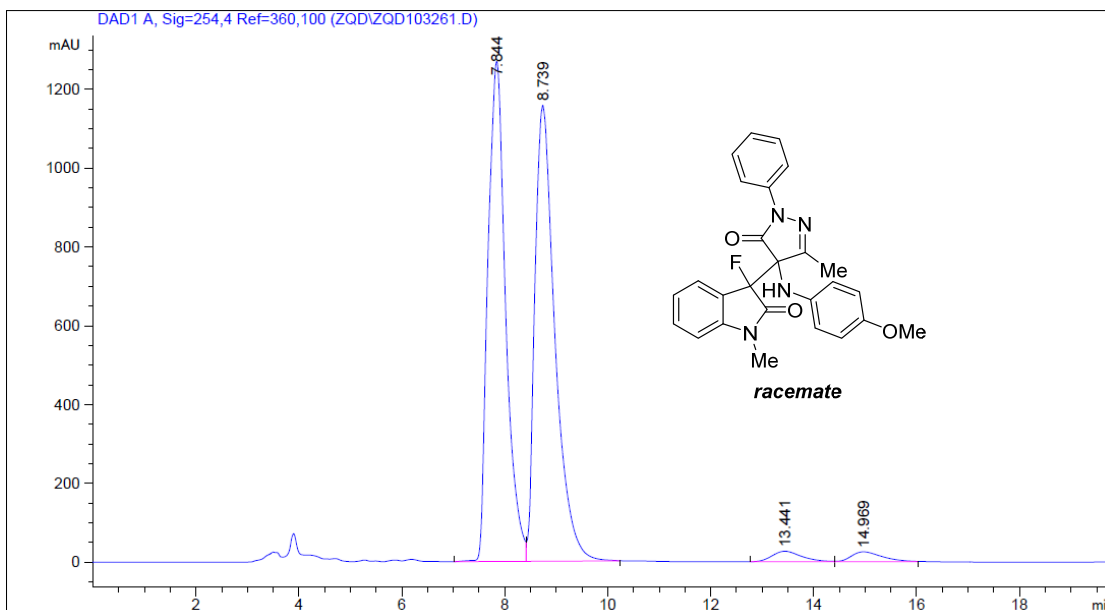

| Peak # | RetTime [min] | Type | Width [min] | Area [mAU*s] | Height [mAU] | Area %  |
|--------|---------------|------|-------------|--------------|--------------|---------|
| 1      | 7.844         | BV   | 0.3833      | 3.03734e4    | 1268.94324   | 47.6205 |
| 2      | 8.739         | VB   | 0.4198      | 3.13241e4    | 1157.21655   | 49.1110 |
| 3      | 13.441        | BV   | 0.5981      | 1060.04395   | 26.64782     | 1.6620  |
| 4      | 14.969        | VB   | 0.6251      | 1024.67969   | 24.95120     | 1.6065  |

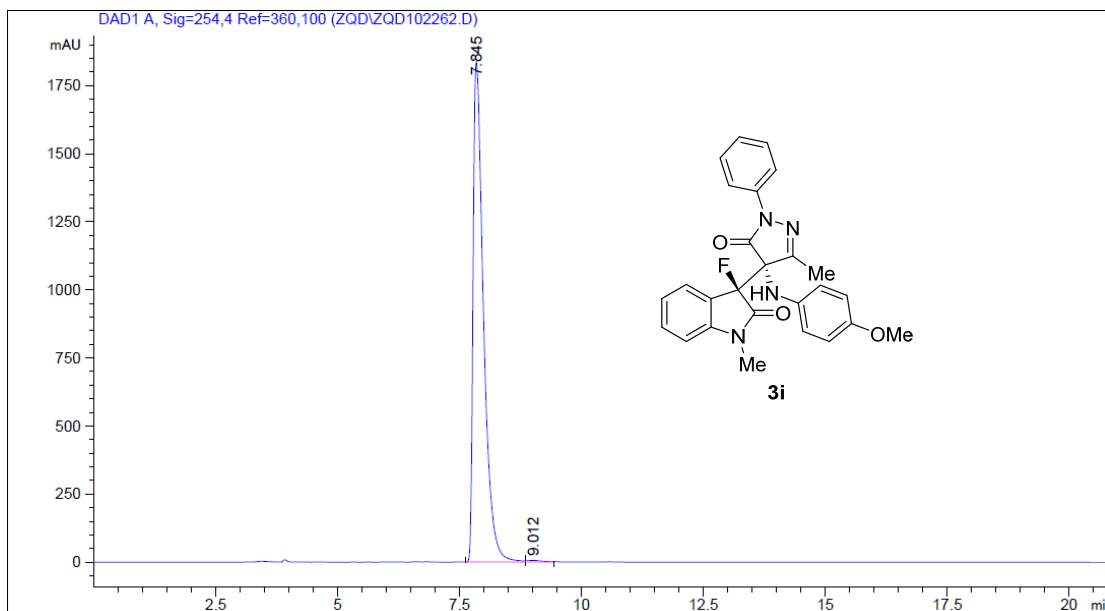

| Peak # | RetTime [min] | Type | Width [min] | Area [mAU*s] | Height [mAU] | Area %  |
|--------|---------------|------|-------------|--------------|--------------|---------|
| 1      | 7.845         | BV   | 0.2223      | 2.71564e4    | 1839.10437   | 99.5643 |
| 2      | 9.012         | VB   | 0.2779      | 118.84081    | 6.08492      | 0.4357  |

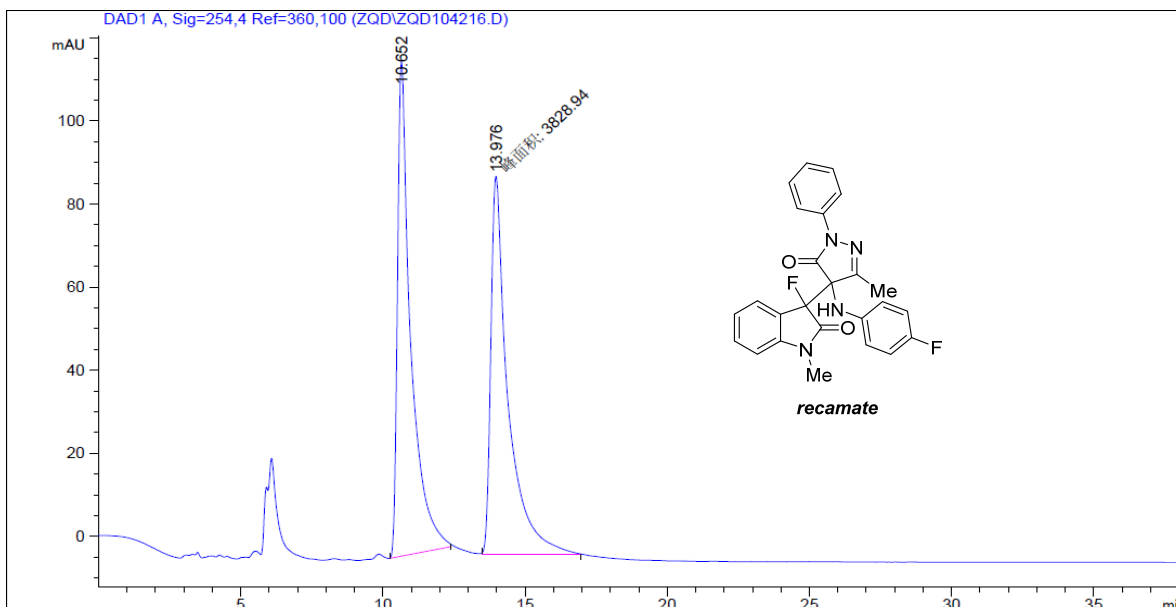

| Peak # | RetTime [min] | Type | Width [min] | Area [mAU*s] | Height [mAU] | Area %  |
|--------|---------------|------|-------------|--------------|--------------|---------|
| 1      | 10.652        | BB   | 0.4568      | 3887.01978   | 119.08190    | 50.3764 |
| 2      | 13.976        | MM   | 0.7013      | 3828.93872   | 90.99483     | 49.6236 |

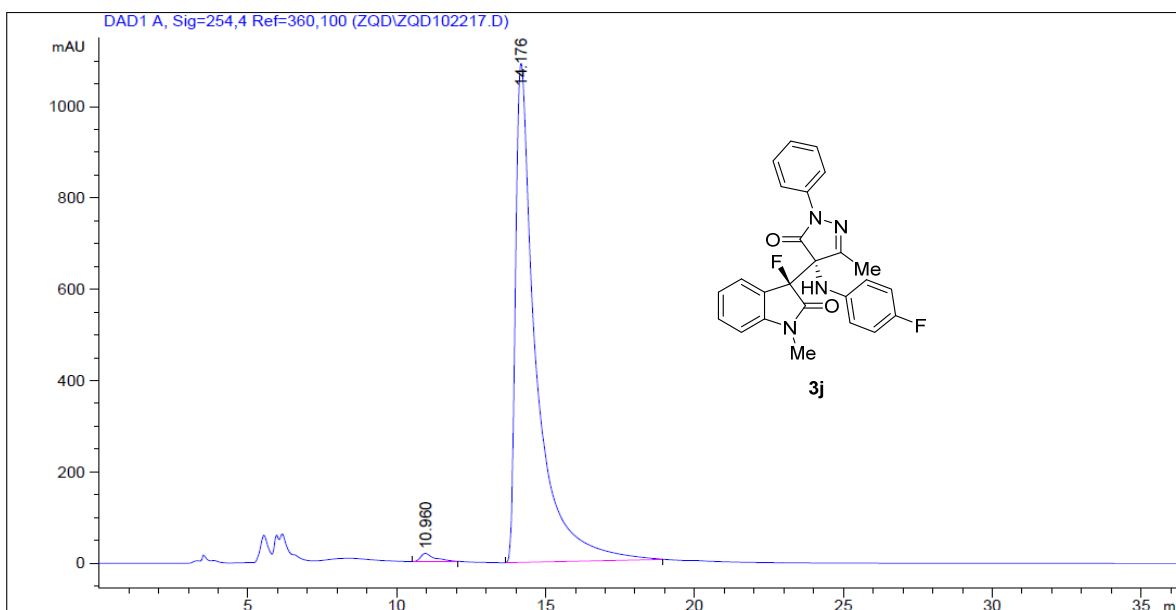

| Peak # | RetTime [min] | Type | Width [min] | Area [mAU*s] | Height [mAU] | Area %  |
|--------|---------------|------|-------------|--------------|--------------|---------|
| 1      | 10.960        | BB   | 0.4705      | 606.92633    | 18.22639     | 1.1405  |
| 2      | 14.176        | BB   | 0.6777      | 5.26074e4    | 1092.74207   | 98.8595 |

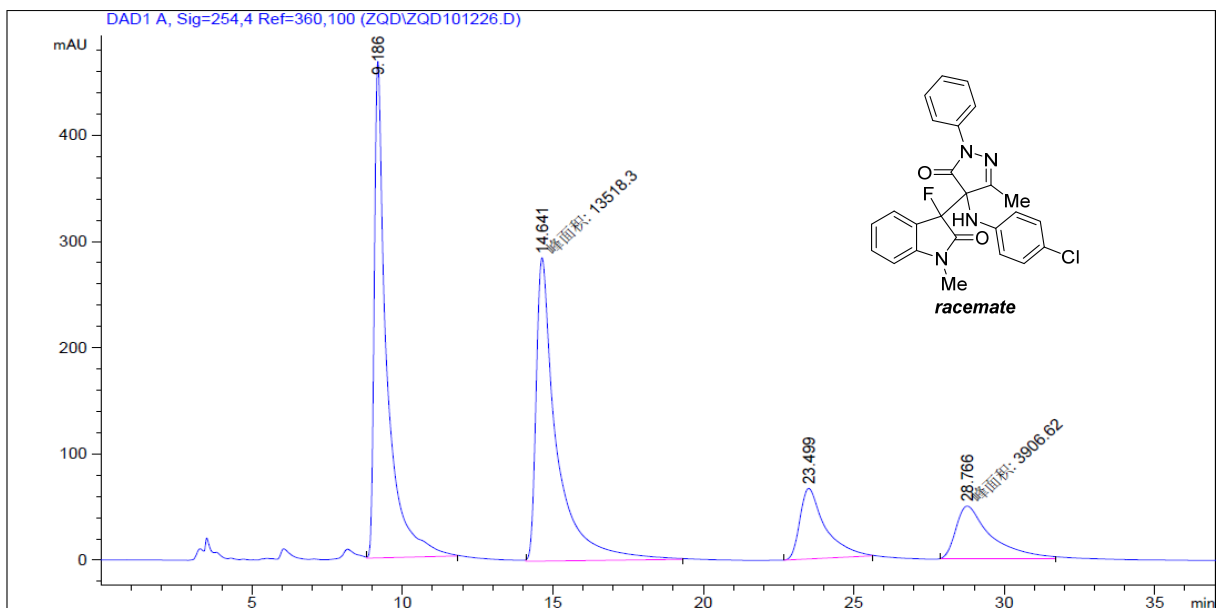

| Peak # | RetTime [min] | Type | Width [min] | Area [mAU*s] | Height [mAU] | Area %  |
|--------|---------------|------|-------------|--------------|--------------|---------|
| 1      | 9.186         | VB   | 0.4014      | 1.35247e4    | 467.61603    | 38.8308 |
| 2      | 14.641        | MM   | 0.7888      | 1.35183e4    | 285.63370    | 38.8124 |
| 3      | 23.499        | BB   | 0.8432      | 3880.23950   | 66.45439     | 11.1406 |
| 4      | 28.766        | MM   | 1.3282      | 3906.62183   | 49.02090     | 11.2163 |

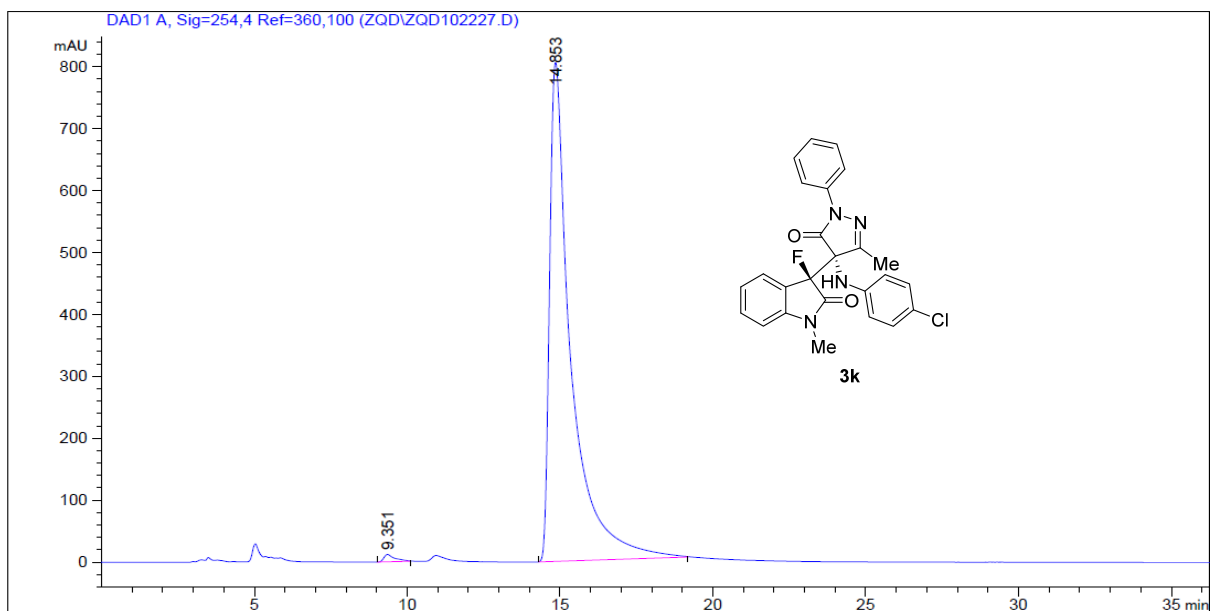

| Peak # | RetTime [min] | Type | Width [min] | Area [mAU*s] | Height [mAU] | Area %  |
|--------|---------------|------|-------------|--------------|--------------|---------|
| 1      | 9.351         | BB   | 0.3541      | 302.01068    | 11.97911     | 0.7624  |
| 2      | 14.853        | BB   | 0.6911      | 3.93110e4    | 805.87976    | 99.2376 |

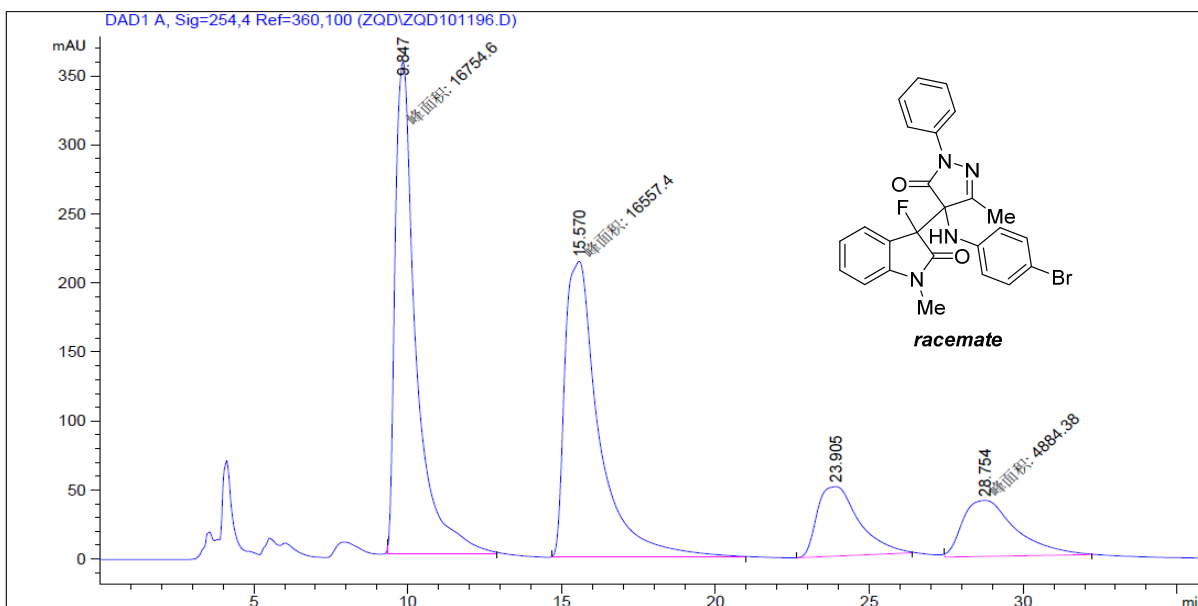

| Peak # | RetTime [min] | Type | Width [min] | Area [mAU*s] | Height [mAU] | Area %  |
|--------|---------------|------|-------------|--------------|--------------|---------|
| 1      | 9.847         | MM   | 0.7844      | 1.67546e4    | 355.98157    | 39.0125 |
| 2      | 15.570        | MM   | 1.2875      | 1.65574e4    | 214.32971    | 38.5533 |
| 3      | 23.905        | BB   | 1.2264      | 4750.44971   | 50.36625     | 11.0612 |
| 4      | 28.754        | MM   | 2.0052      | 4884.37939   | 40.59732     | 11.3731 |

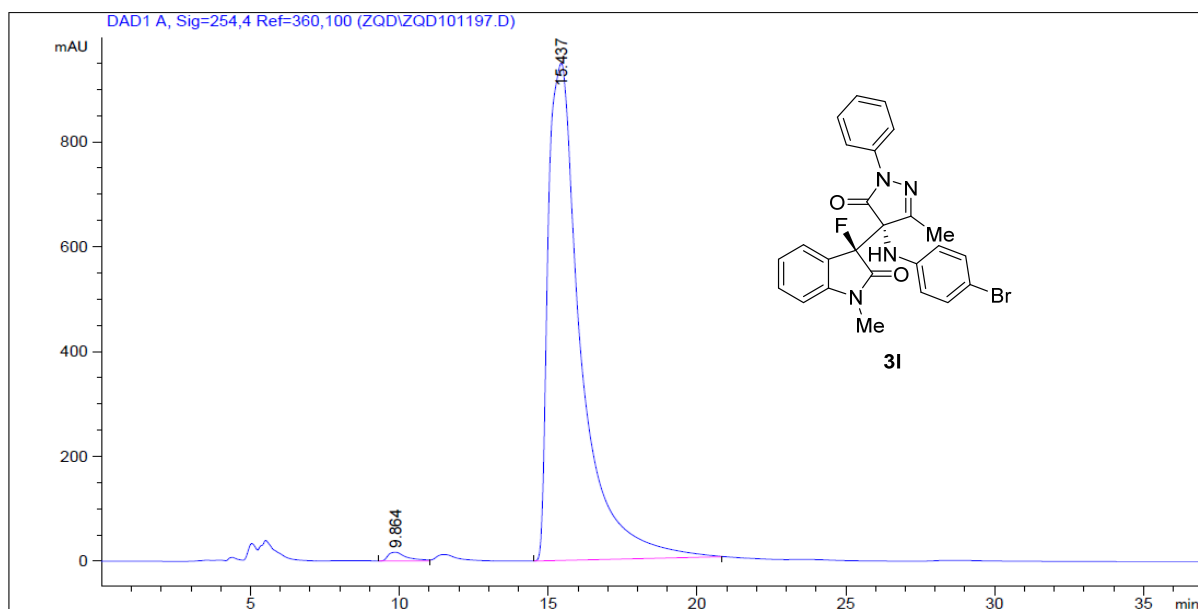

| Peak # | RetTime [min] | Type | Width [min] | Area [mAU*s] | Height [mAU] | Area %  |
|--------|---------------|------|-------------|--------------|--------------|---------|
| 1      | 9.864         | BB   | 0.6421      | 716.93677    | 16.52725     | 0.9795  |
| 2      | 15.437        | BB   | 1.1414      | 7.24741e4    | 948.50500    | 99.0205 |

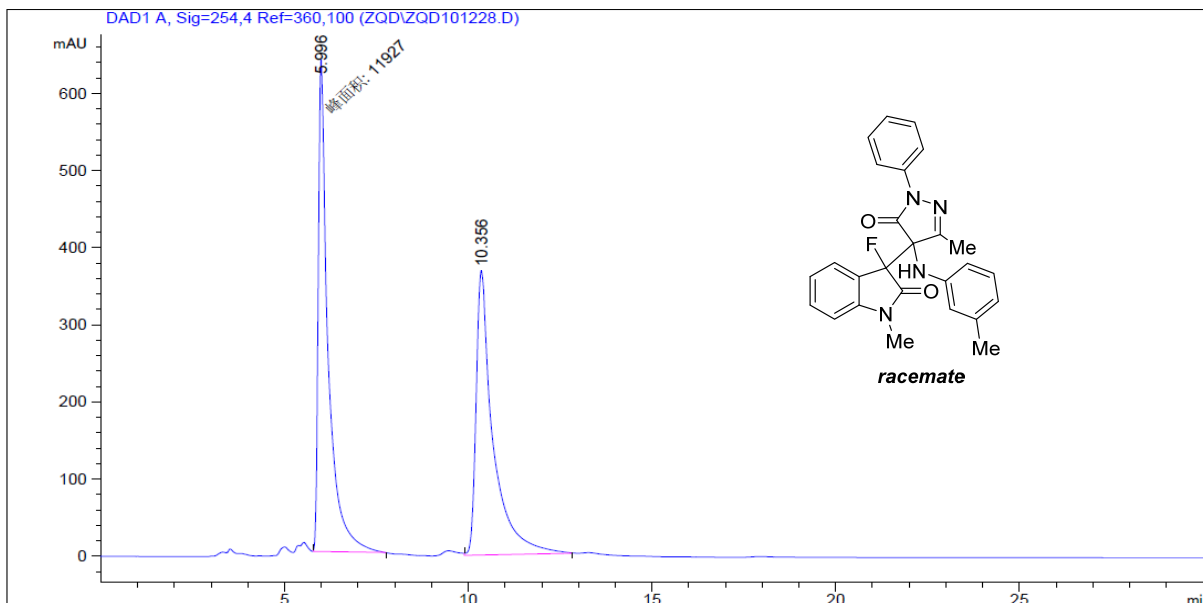

| Peak # | RetTime [min] | Type | Width [min] | Area [mAU*s] | Height [mAU] | Area %  |
|--------|---------------|------|-------------|--------------|--------------|---------|
| 1      | 5.996         | MM   | 0.3116      | 1.19270e4    | 637.84229    | 50.2761 |
| 2      | 10.356        | VB   | 0.4449      | 1.17960e4    | 369.07785    | 49.7239 |

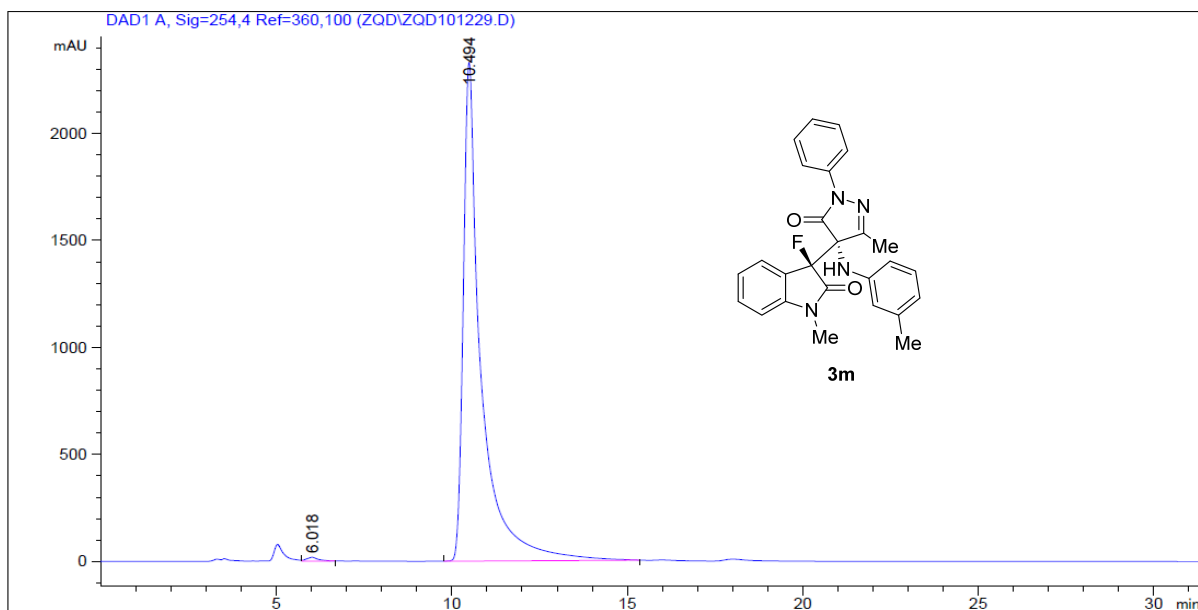

| Peak # | RetTime [min] | Type | Width [min] | Area [mAU*s] | Height [mAU] | Area %  |
|--------|---------------|------|-------------|--------------|--------------|---------|
| 1      | 6.018         | VB   | 0.3113      | 419.89084    | 18.46594     | 0.5052  |
| 2      | 10.494        | BB   | 0.4899      | 8.26909e4    | 2330.98950   | 99.4948 |

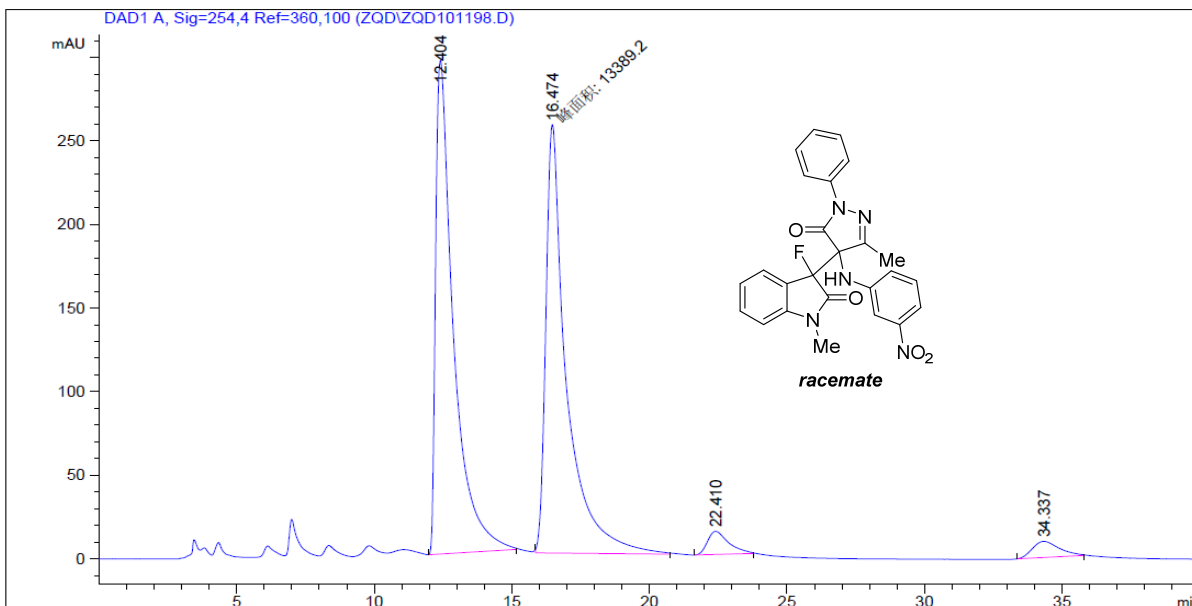

| Peak # | RetTime [min] | Type | Width [min] | Area [mAU*s] | Height [mAU] | Area %  |
|--------|---------------|------|-------------|--------------|--------------|---------|
| 1      | 12.404        | BB   | 0.6521      | 1.33200e4    | 295.37213    | 47.3851 |
| 2      | 16.474        | MM   | 0.8707      | 1.33892e4    | 256.29105    | 47.6314 |
| 3      | 22.410        | BB   | 0.7689      | 741.49408    | 13.84439     | 2.6378  |
| 4      | 34.337        | BB   | 0.8455      | 659.37006    | 9.67033      | 2.3457  |

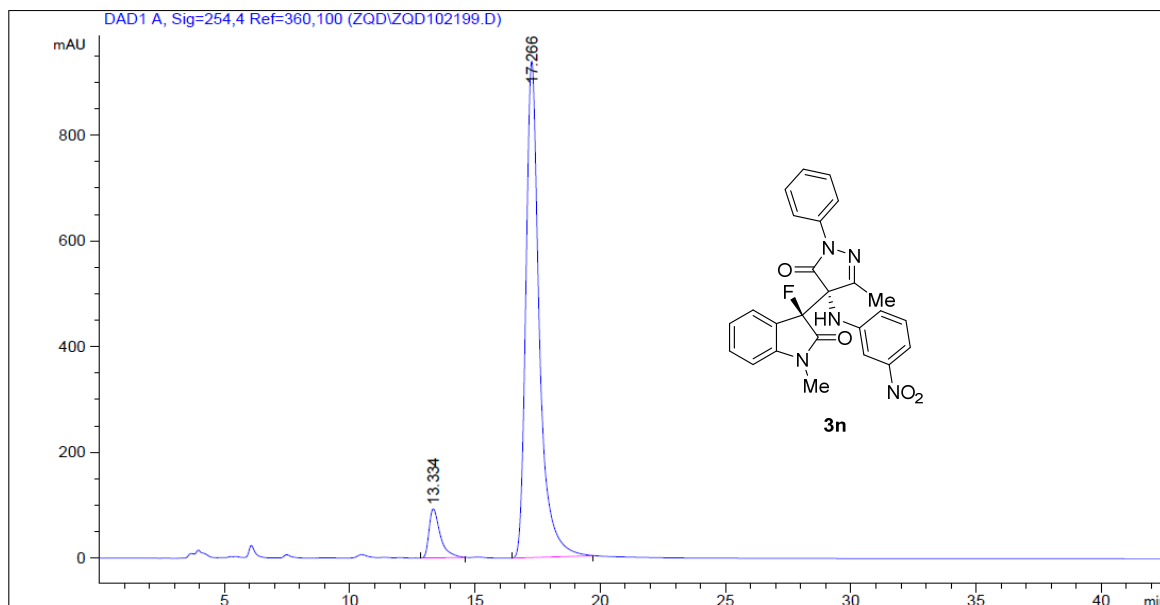

| Peak # | RetTime [min] | Type | Width [min] | Area [mAU*s] | Height [mAU] | Area %  |
|--------|---------------|------|-------------|--------------|--------------|---------|
| 1      | 13.334        | BB   | 0.4674      | 2896.23560   | 92.98054     | 7.5842  |
| 2      | 17.266        | BB   | 0.5624      | 3.52918e4    | 939.15857    | 92.4158 |

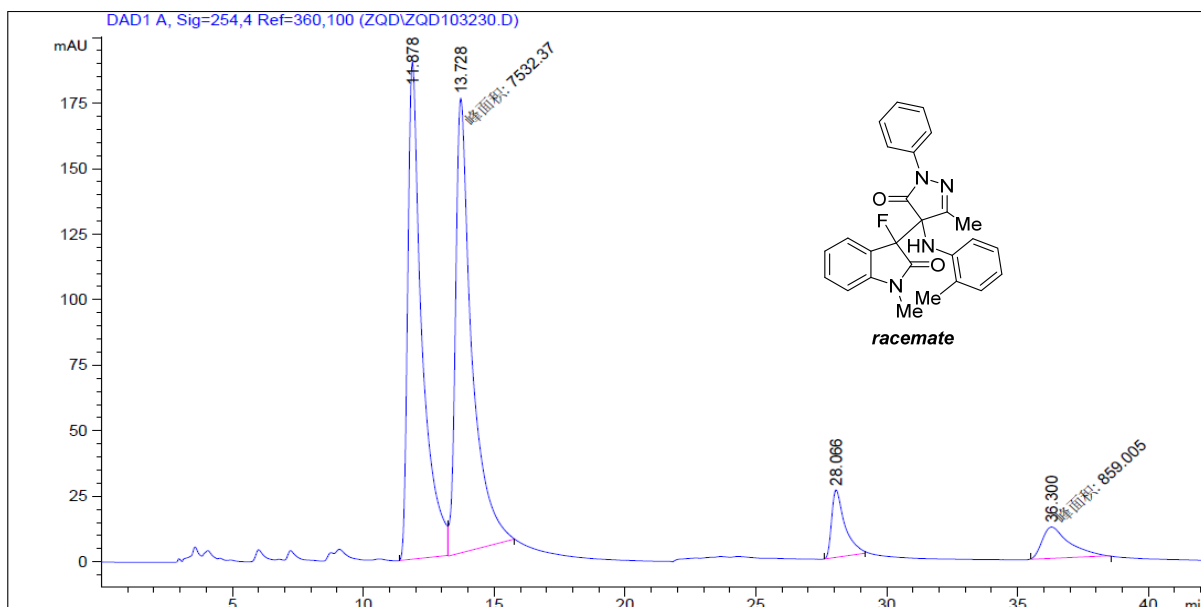

| Peak # | RetTime [min] | Type | Width [min] | Area [mAU*s] | Height [mAU] | Area %  |
|--------|---------------|------|-------------|--------------|--------------|---------|
| 1      | 11.878        | BV   | 0.5458      | 7211.27637   | 189.57137    | 43.6915 |
| 2      | 13.728        | MM   | 0.7236      | 7532.36816   | 173.49495    | 45.6370 |
| 3      | 28.066        | BB   | 0.5129      | 902.32495    | 25.74213     | 5.4670  |
| 4      | 36.300        | MM   | 1.1983      | 859.00519    | 11.94770     | 5.2045  |

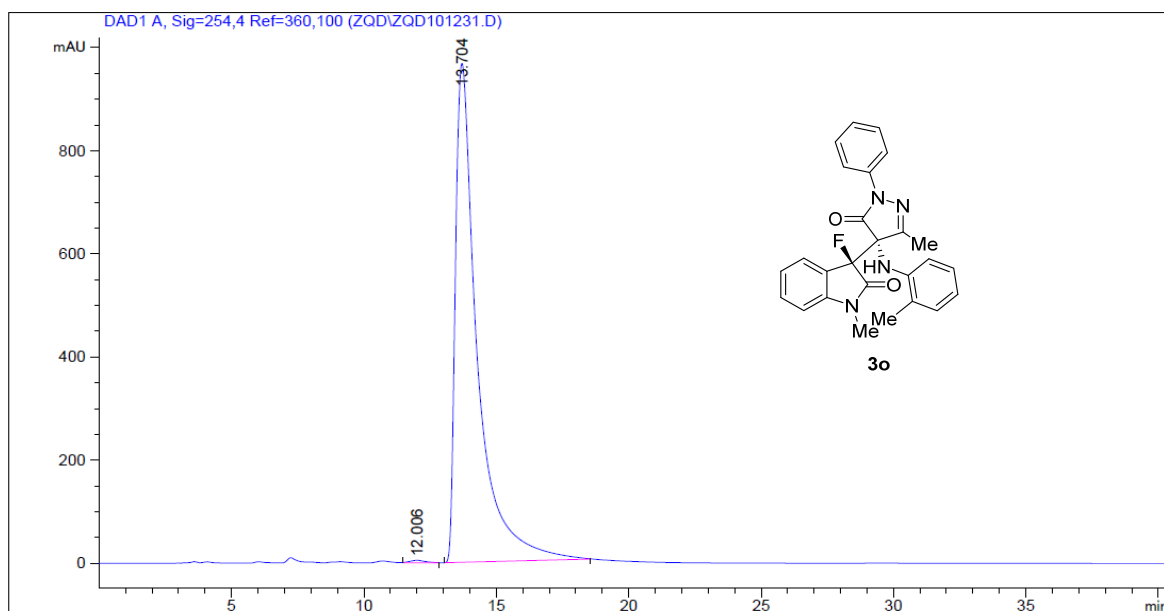

| Peak # | RetTime [min] | Type | Width [min] | Area [mAU*s] | Height [mAU] | Area %  |
|--------|---------------|------|-------------|--------------|--------------|---------|
| 1      | 12.006        | BB   | 0.5380      | 194.39804    | 4.88788      | 0.3486  |
| 2      | 13.704        | BB   | 0.8361      | 5.55787e4    | 967.71069    | 99.6514 |



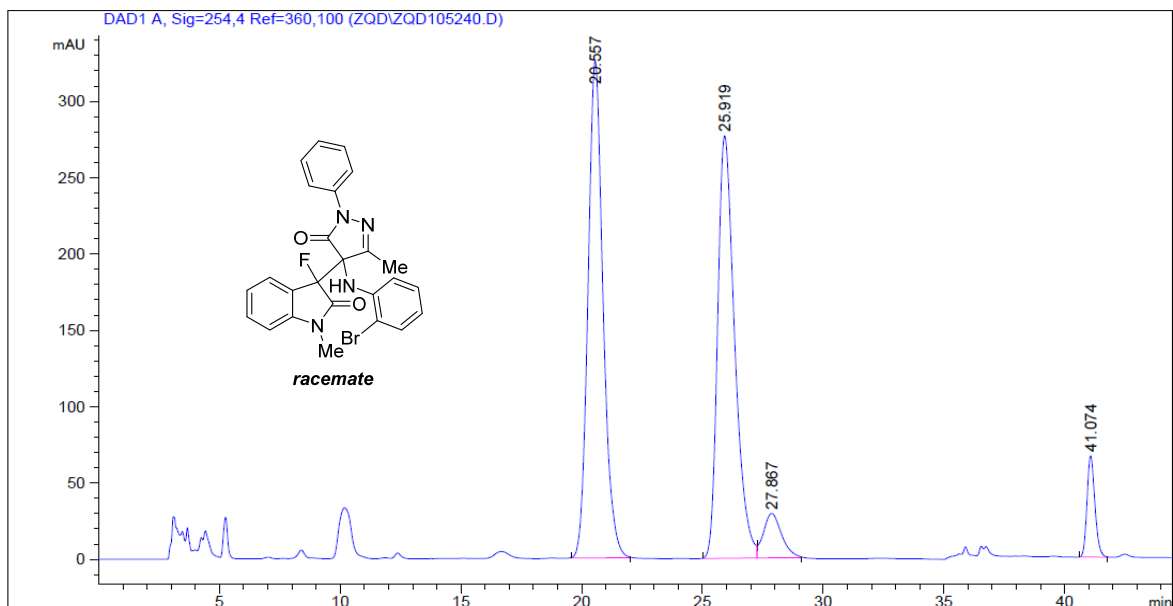

| Peak # | RetTime [min] | Type | Width [min] | Area [mAU*s] | Height [mAU] | Area %  |
|--------|---------------|------|-------------|--------------|--------------|---------|
| 1      | 20.557        | BB   | 0.6621      | 1.41142e4    | 325.36551    | 45.9671 |
| 2      | 25.919        | BB   | 0.7459      | 1.35676e4    | 276.79010    | 44.1869 |
| 3      | 27.867        | BB   | 0.7837      | 1520.21301   | 29.08757     | 4.9510  |
| 4      | 41.074        | BB   | 0.3480      | 1503.03674   | 66.42085     | 4.8951  |

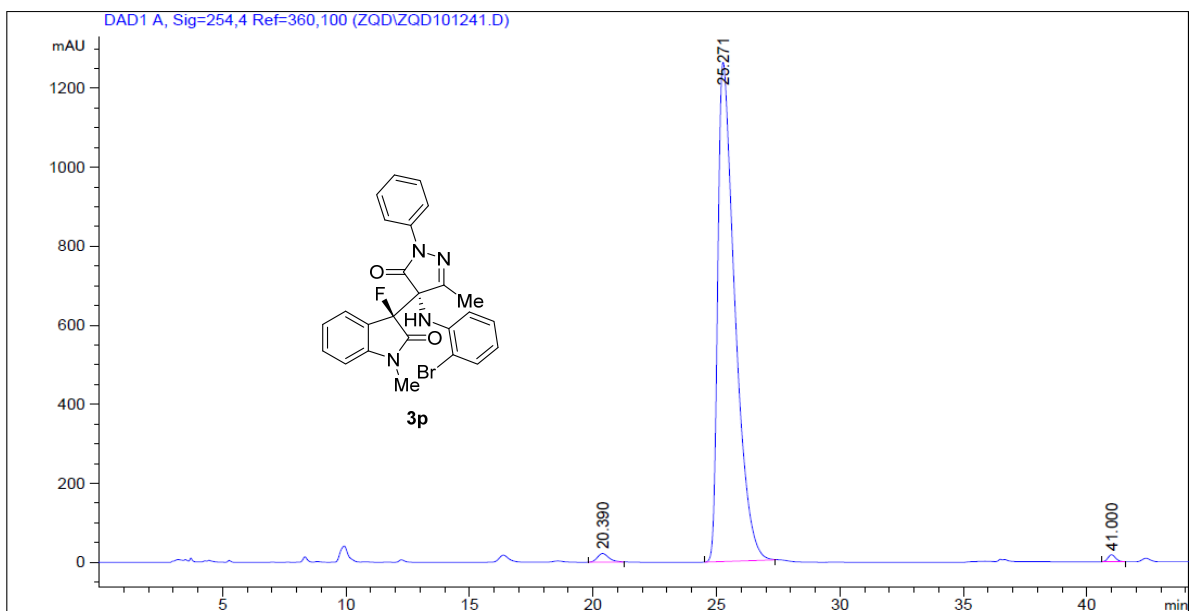

| Peak # | RetTime [min] | Type | Width [min] | Area [mAU*s] | Height [mAU] | Area %  |
|--------|---------------|------|-------------|--------------|--------------|---------|
| 1      | 20.390        | BB   | 0.4981      | 720.13251    | 21.87251     | 1.1621  |
| 2      | 25.271        | BB   | 0.7181      | 6.08550e4    | 1263.13513   | 98.2070 |
| 3      | 41.000        | BB   | 0.3360      | 390.90961    | 17.95379     | 0.6308  |

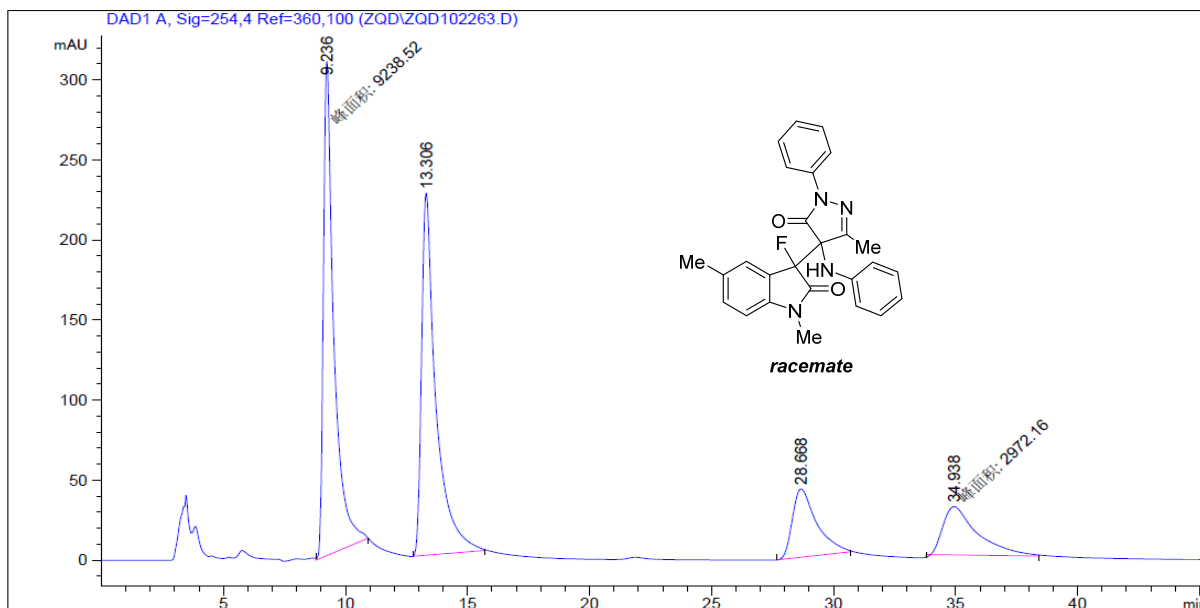

| Peak # | RetTime [min] | Type | Width [min] | Area [mAU*s] | Height [mAU] | Area %  |
|--------|---------------|------|-------------|--------------|--------------|---------|
| 1      | 9.236         | MM   | 0.4989      | 9238.51660   | 308.62634    | 37.8803 |
| 2      | 13.306        | BB   | 0.5806      | 9237.08398   | 226.13391    | 37.8745 |
| 3      | 28.688        | BB   | 0.9952      | 2940.92456   | 42.71903     | 12.0586 |
| 4      | 34.938        | MM   | 1.6443      | 2972.15747   | 30.12531     | 12.1866 |

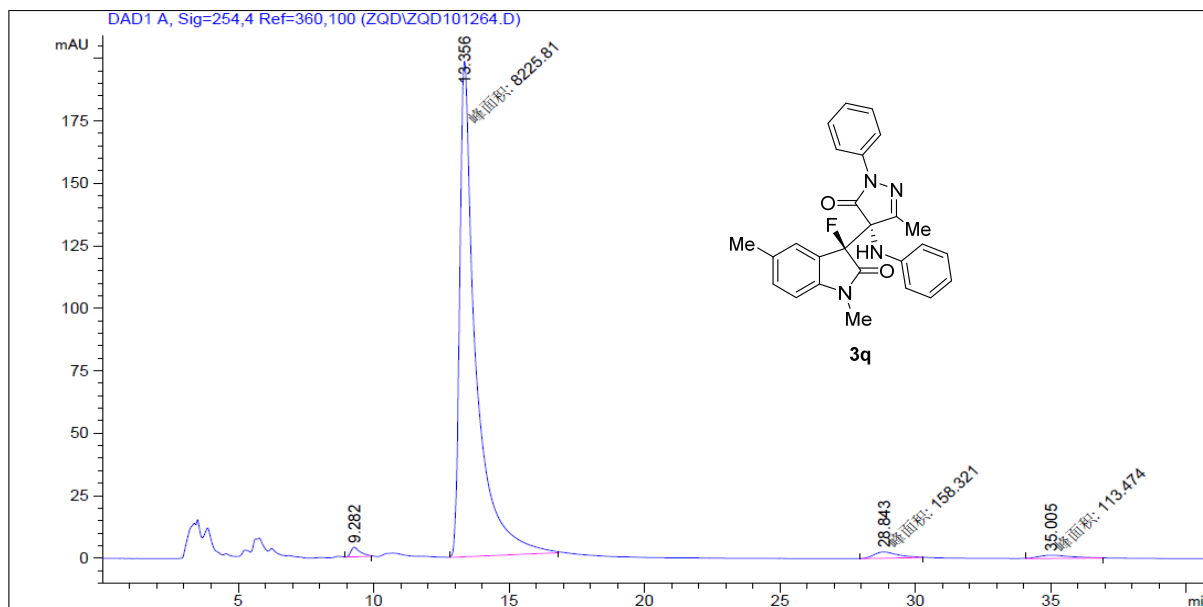

| Peak # | RetTime [min] | Type | Width [min] | Area [mAU*s] | Height [mAU] | Area %  |
|--------|---------------|------|-------------|--------------|--------------|---------|
| 1      | 9.282         | BB   | 0.3463      | 92.07326     | 3.77869      | 1.0719  |
| 2      | 13.356        | MM   | 0.6912      | 8225.80957   | 198.35567    | 95.7639 |
| 3      | 28.843        | MM   | 1.0388      | 158.32072    | 2.54024      | 1.8432  |
| 4      | 35.005        | MM   | 1.4511      | 113.47414    | 1.30327      | 1.3211  |

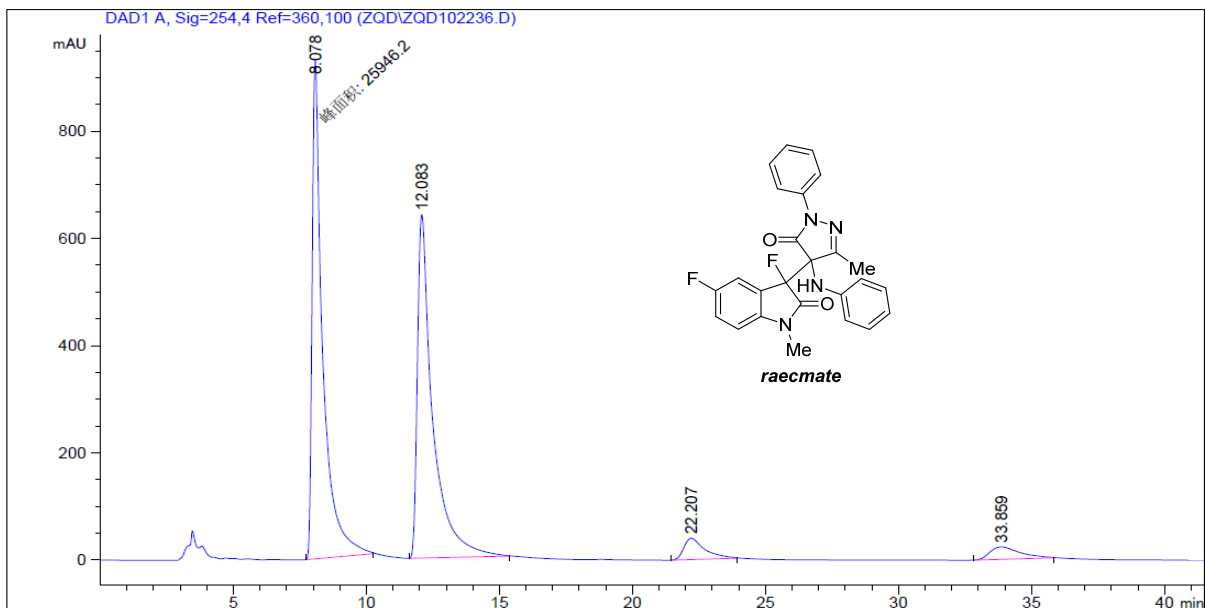

| Peak # | RetTime [min] | Type | Width [min] | Area [mAU*s] | Height [mAU] | Area %  |
|--------|---------------|------|-------------|--------------|--------------|---------|
| 1      | 8.078         | MM   | 0.4646      | 2.59462e4    | 930.67548    | 46.6451 |
| 2      | 12.083        | BB   | 0.5627      | 2.56467e4    | 641.13300    | 46.1065 |
| 3      | 22.207        | BB   | 0.7947      | 2184.98560   | 39.91110     | 3.9281  |
| 4      | 33.859        | BB   | 1.1127      | 1846.95117   | 23.35297     | 3.3204  |

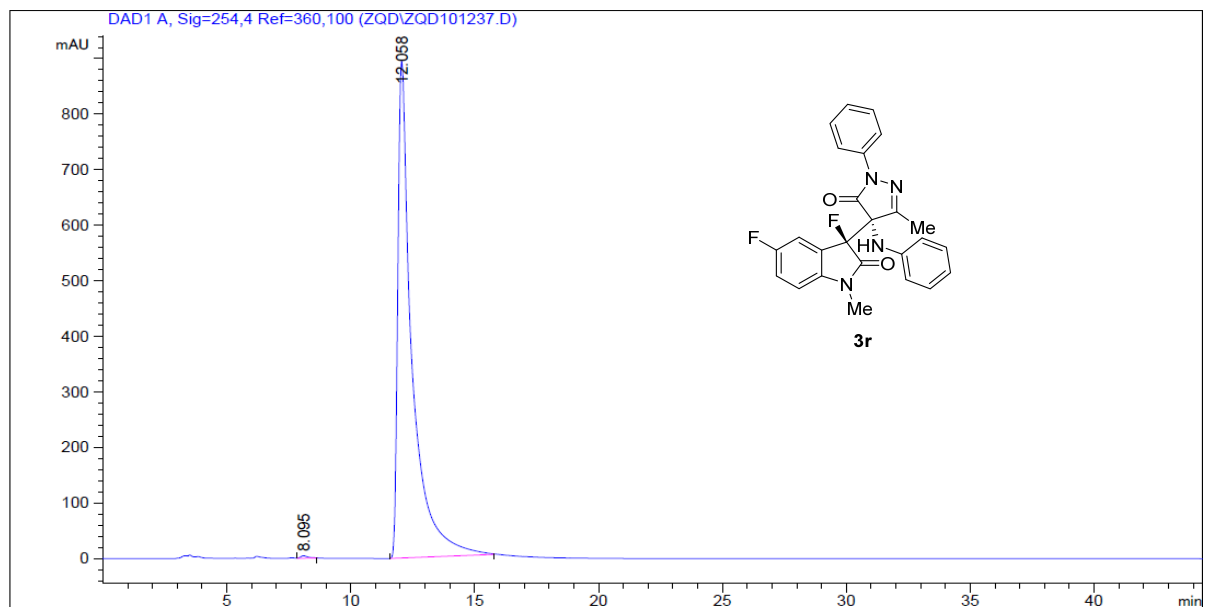

| Peak # | RetTime [min] | Type | Width [min] | Area [mAU*s] | Height [mAU] | Area %  |
|--------|---------------|------|-------------|--------------|--------------|---------|
| 1      | 8.095         | BB   | 0.3105      | 97.19876     | 4.49139      | 0.2714  |
| 2      | 12.058        | BB   | 0.5599      | 3.57206e4    | 894.49554    | 99.7286 |

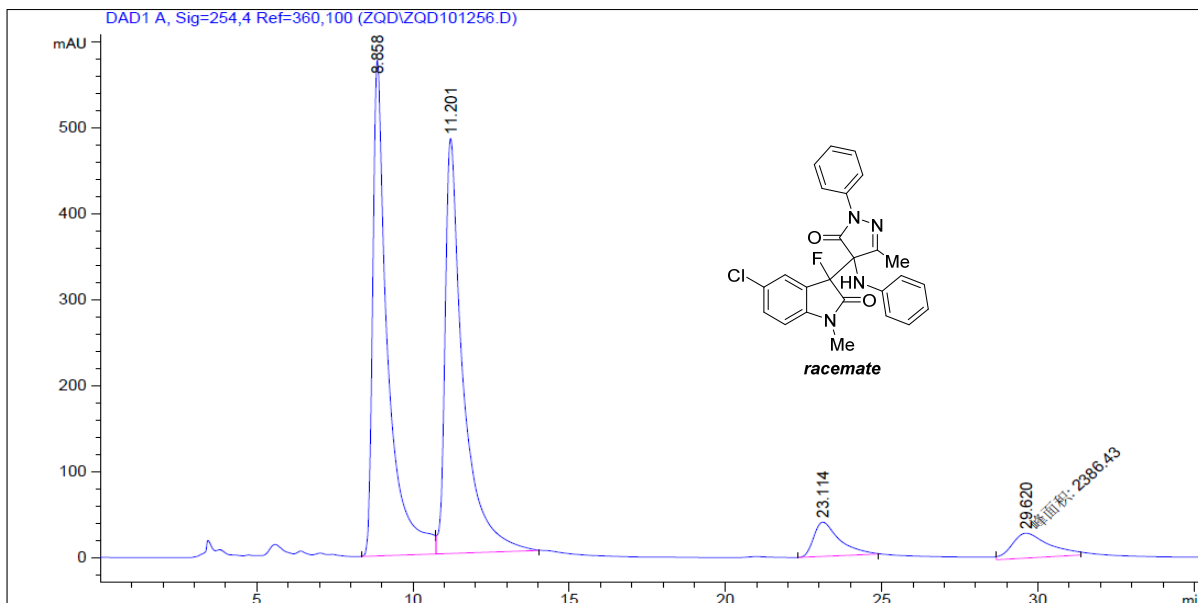

| Peak # | RetTime [min] | Type | Width [min] | Area [mAU*s] | Height [mAU] | Area %  |
|--------|---------------|------|-------------|--------------|--------------|---------|
| 1      | 8.858         | BV   | 0.4699      | 1.93798e4    | 576.99146    | 44.5575 |
| 2      | 11.201        | VB   | 0.5694      | 1.94331e4    | 482.95026    | 44.6800 |
| 3      | 23.114        | BB   | 0.8403      | 2294.59033   | 39.93878     | 5.2757  |
| 4      | 29.620        | MM   | 1.3743      | 2386.43188   | 28.94032     | 5.4868  |

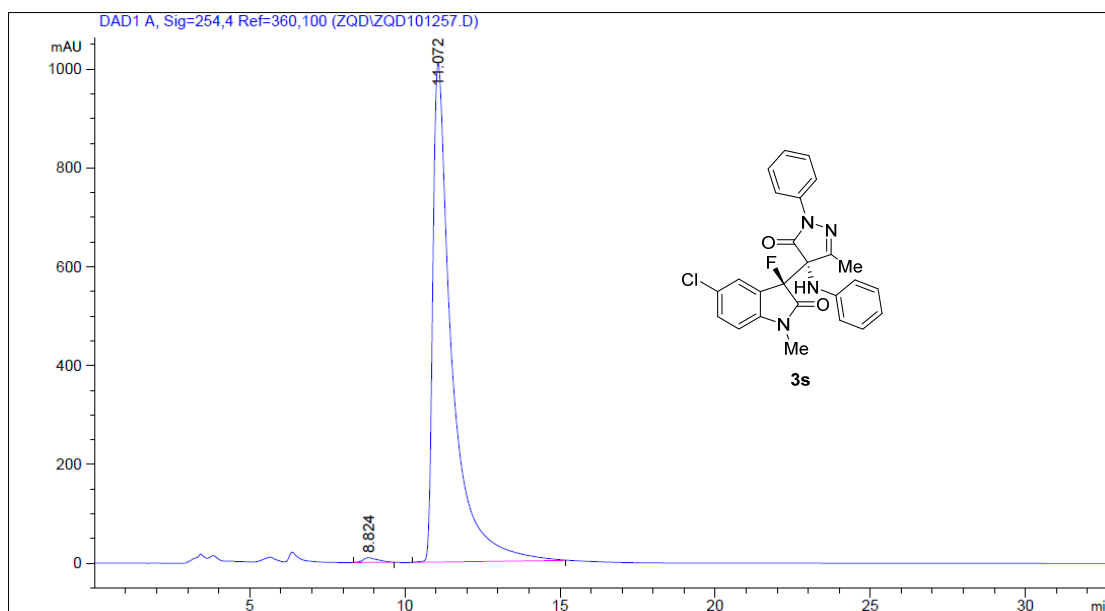

| Peak # | RetTime [min] | Type | Width [min] | Area [mAU*s] | Height [mAU] | Area %  |
|--------|---------------|------|-------------|--------------|--------------|---------|
| 1      | 8.824         | BB   | 0.4721      | 322.96133    | 9.65921      | 0.7474  |
| 2      | 11.072        | BB   | 0.6056      | 4.28855e4    | 1009.59741   | 99.2526 |

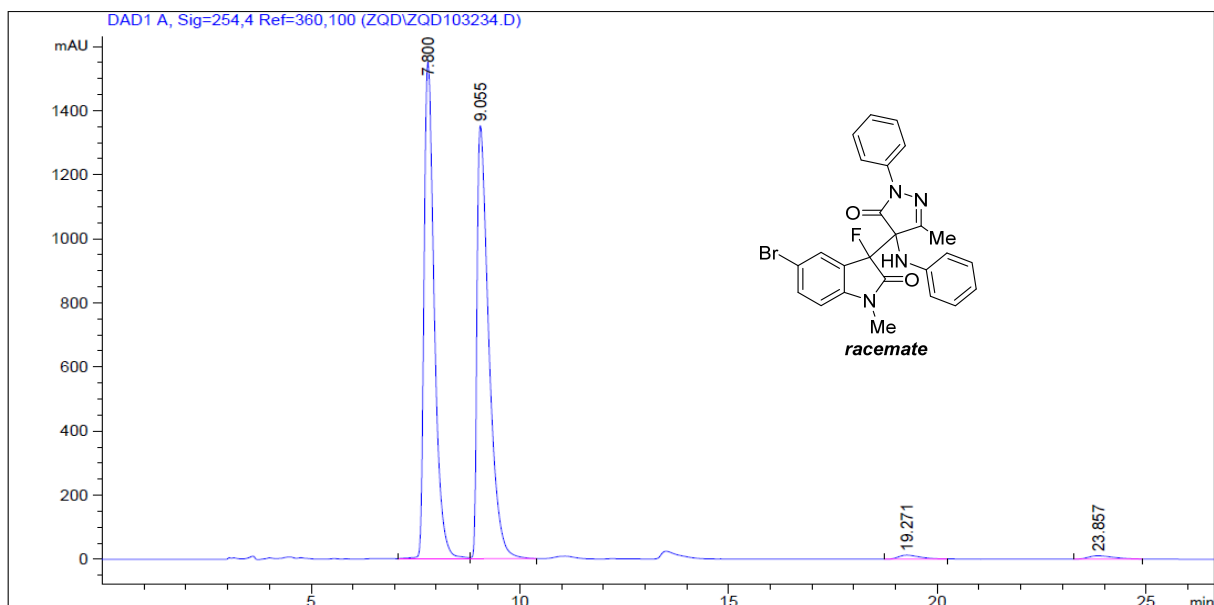

| Peak # | RetTime [min] | Type | Width [min] | Area [mAU*s] | Height [mAU] | Area %  |
|--------|---------------|------|-------------|--------------|--------------|---------|
| 1      | 7.800         | BV   | 0.2637      | 2.65402e4    | 1550.65125   | 49.1481 |
| 2      | 9.055         | VB   | 0.2974      | 2.65760e4    | 1351.54614   | 49.2145 |
| 3      | 19.271        | BB   | 0.5463      | 437.56903    | 12.32246     | 0.8103  |
| 4      | 23.857        | BB   | 0.6314      | 446.65436    | 10.56210     | 0.8271  |

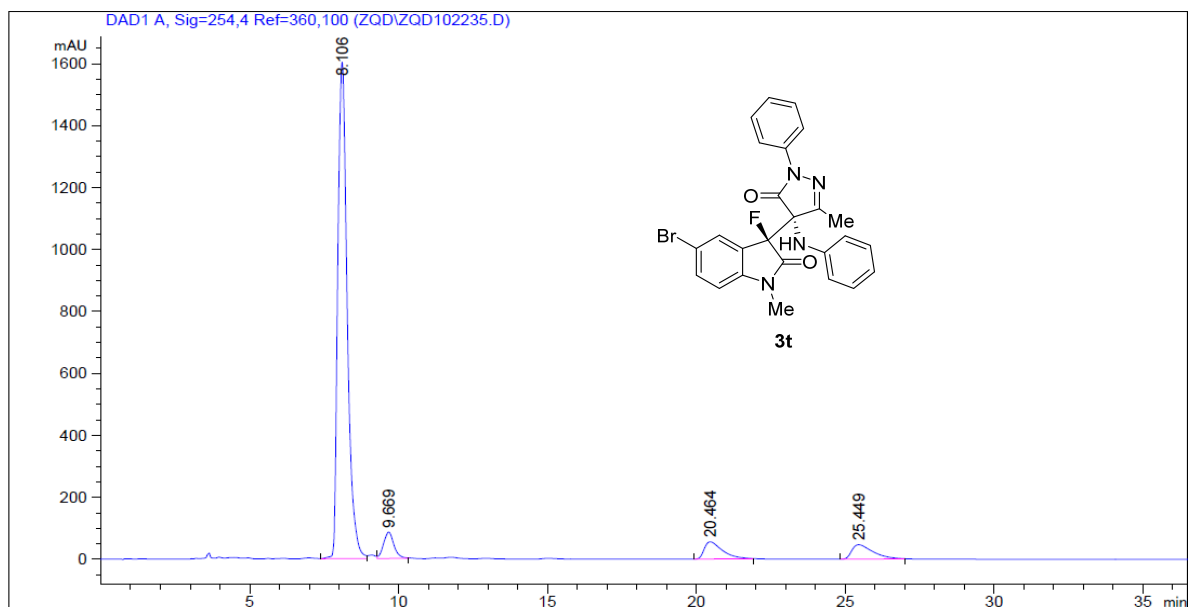

| Peak # | RetTime [min] | Type | Width [min] | Area [mAU*s] | Height [mAU] | Area %  |
|--------|---------------|------|-------------|--------------|--------------|---------|
| 1      | 8.106         | VV   | 0.3485      | 3.52454e4    | 1603.17969   | 83.9849 |
| 2      | 9.669         | VB   | 0.3793      | 2069.67163   | 85.22997     | 4.9317  |
| 3      | 20.464        | BB   | 0.6416      | 2363.24316   | 55.63307     | 5.6313  |
| 4      | 25.449        | BB   | 0.7343      | 2288.02808   | 46.47846     | 5.4520  |

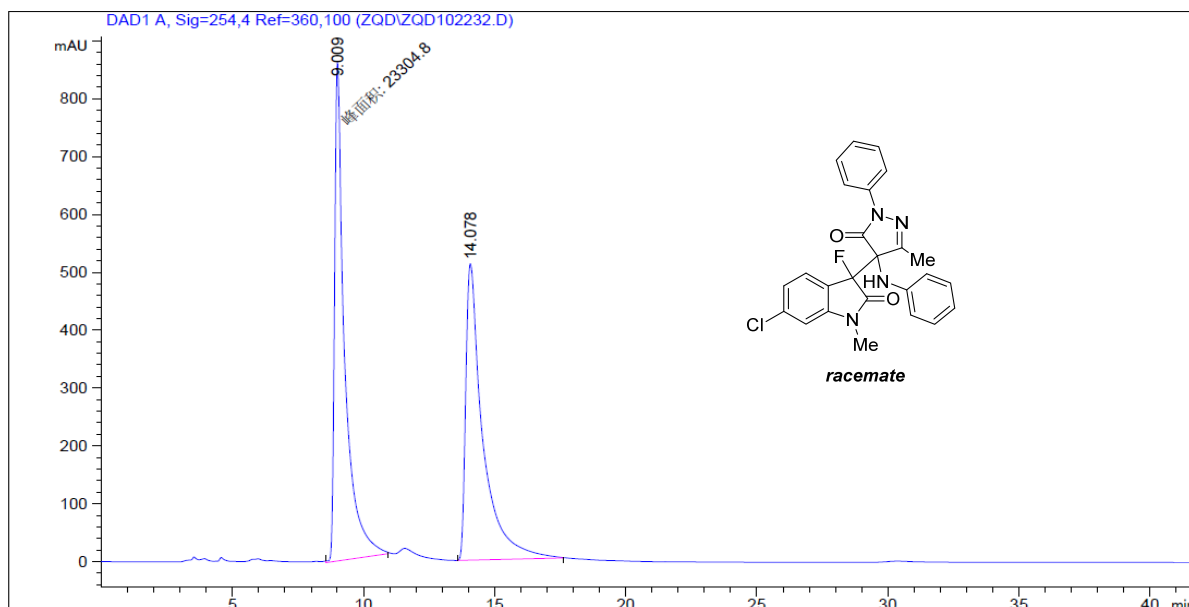

| Peak # | RetTime [min] | Type | Width [min] | Area [mAU*s] | Height [mAU] | Area %  |
|--------|---------------|------|-------------|--------------|--------------|---------|
| 1      | 9.009         | MM   | 0.4506      | 2.33048e4    | 862.04279    | 50.0705 |
| 2      | 14.078        | BB   | 0.6409      | 2.32392e4    | 512.65649    | 49.9295 |

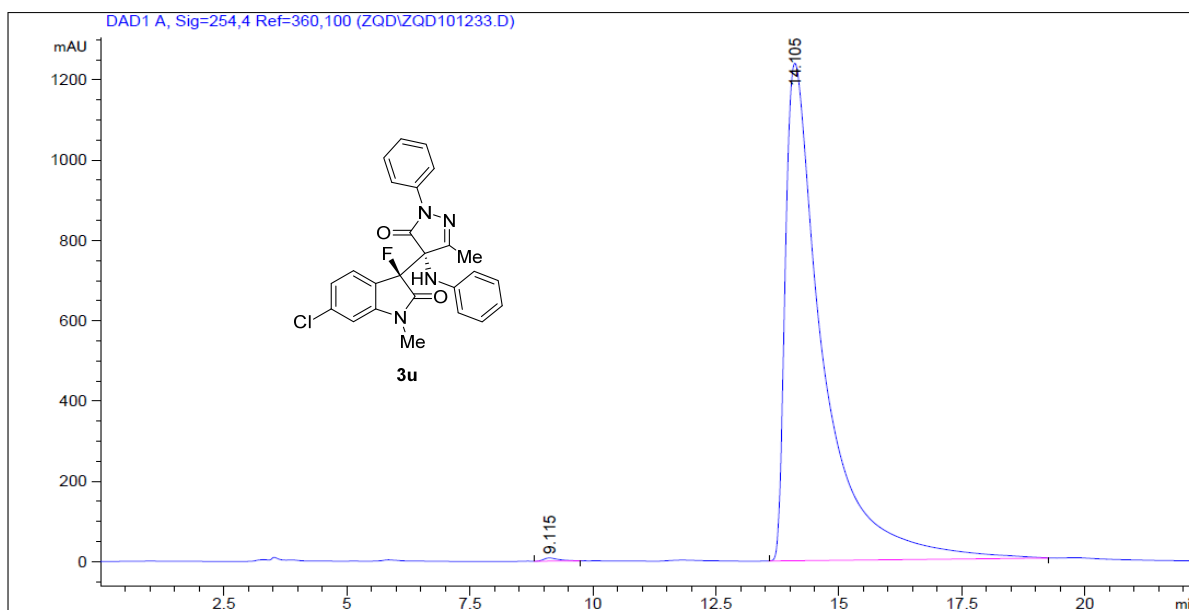

| Peak # | RetTime [min] | Type | Width [min] | Area [mAU*s] | Height [mAU] | Area %  |
|--------|---------------|------|-------------|--------------|--------------|---------|
| 1      | 9.115         | BB   | 0.3180      | 174.03249    | 7.93242      | 0.2627  |
| 2      | 14.105        | BB   | 0.7620      | 6.60634e4    | 1239.10413   | 99.7373 |

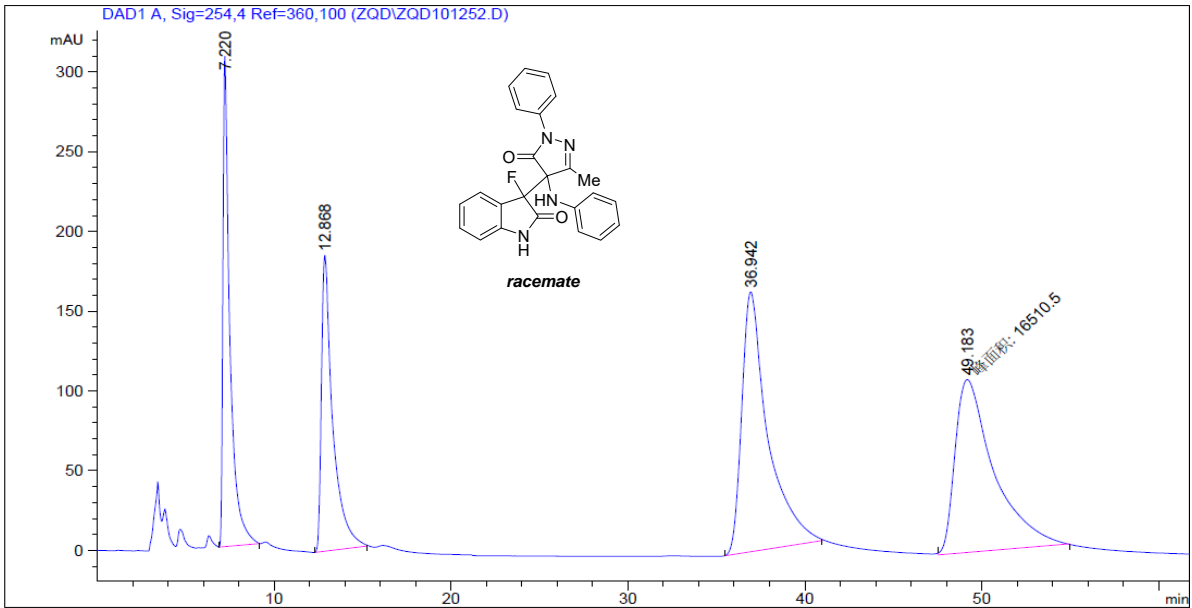

| Peak # | RetTime [min] | Type | Width [min] | Area [mAU*s] | Height [mAU] | Area %  |
|--------|---------------|------|-------------|--------------|--------------|---------|
| 1      | 7.220         | VB   | 0.3846      | 8448.24902   | 307.43680    | 16.9451 |
| 2      | 12.868        | BB   | 0.6299      | 8236.50293   | 185.54865    | 16.5204 |
| 3      | 36.942        | BB   | 1.4535      | 1.66613e4    | 162.86472    | 33.4185 |
| 4      | 49.183        | MM   | 2.5391      | 1.65105e4    | 108.37518    | 33.1160 |

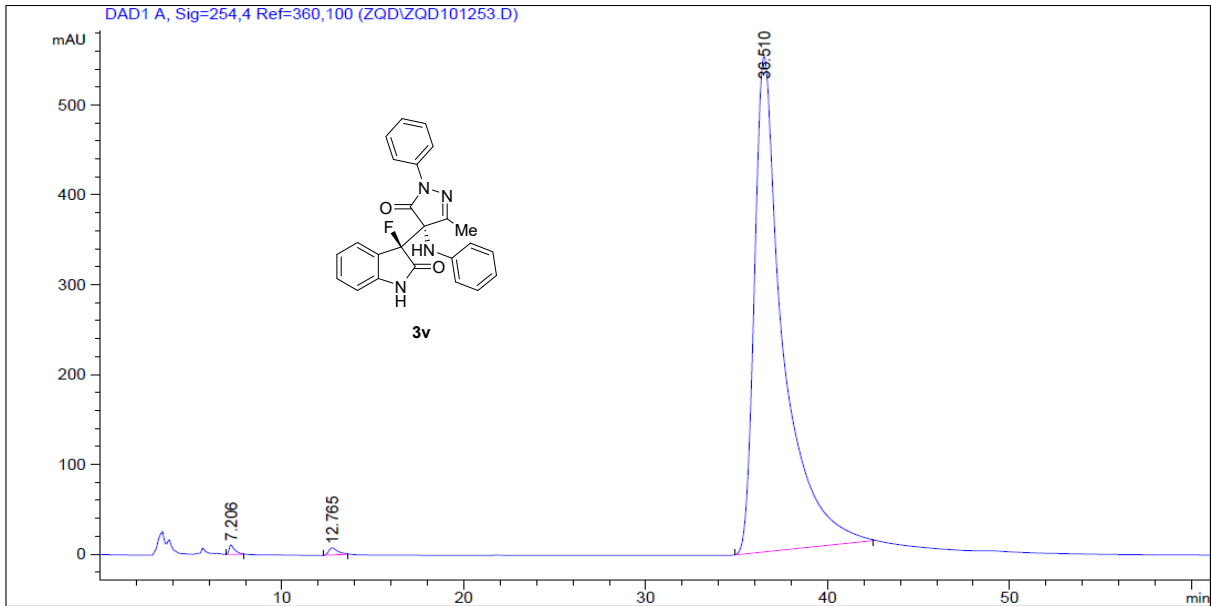

| Peak # | RetTime [min] | Type | Width [min] | Area [mAU*s] | Height [mAU] | Area %  |
|--------|---------------|------|-------------|--------------|--------------|---------|
| 1      | 7.206         | BB   | 0.3127      | 230.23994    | 10.54505     | 0.3795  |
| 2      | 12.765        | BB   | 0.5052      | 276.29623    | 7.95599      | 0.4554  |
| 3      | 36.510        | BB   | 1.5383      | 6.01635e4    | 551.69360    | 99.1651 |

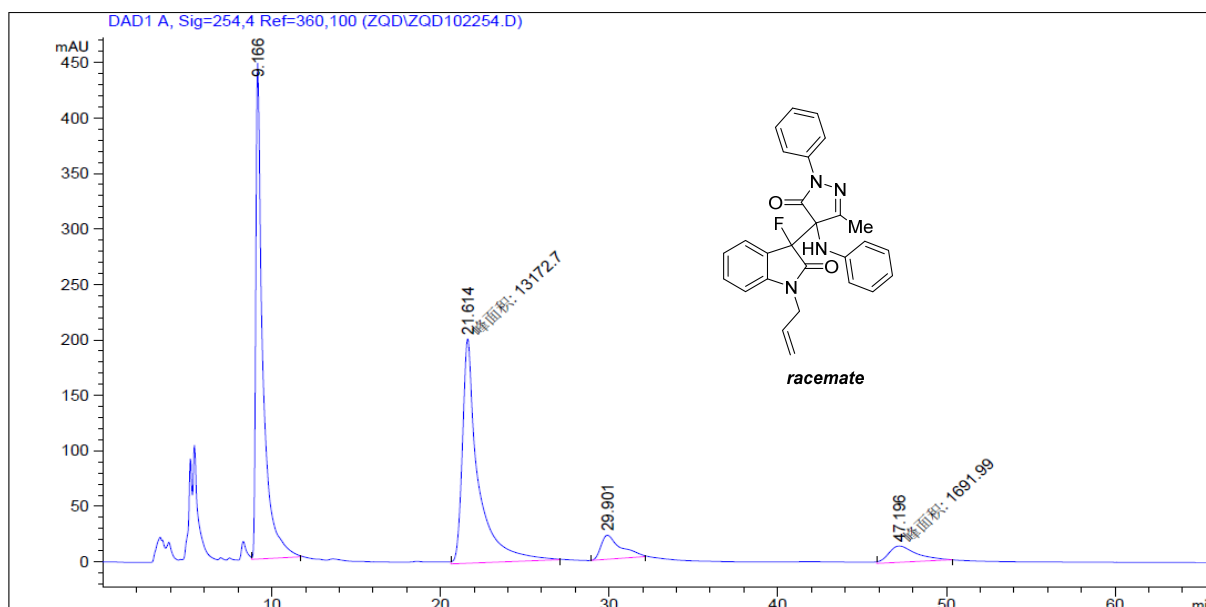

| Peak # | RetTime [min] | Type | Width [min] | Area [mAU*s] | Height [mAU] | Area %  |
|--------|---------------|------|-------------|--------------|--------------|---------|
| 1      | 9.166         | VB   | 0.4080      | 1.30991e4    | 446.84305    | 44.0523 |
| 2      | 21.614        | MM   | 1.0853      | 1.31727e4    | 202.29279    | 44.2998 |
| 3      | 29.901        | BB   | 1.1414      | 1771.57434   | 21.67915     | 5.9578  |
| 4      | 47.196        | MM   | 1.9238      | 1691.98840   | 14.65837     | 5.6901  |

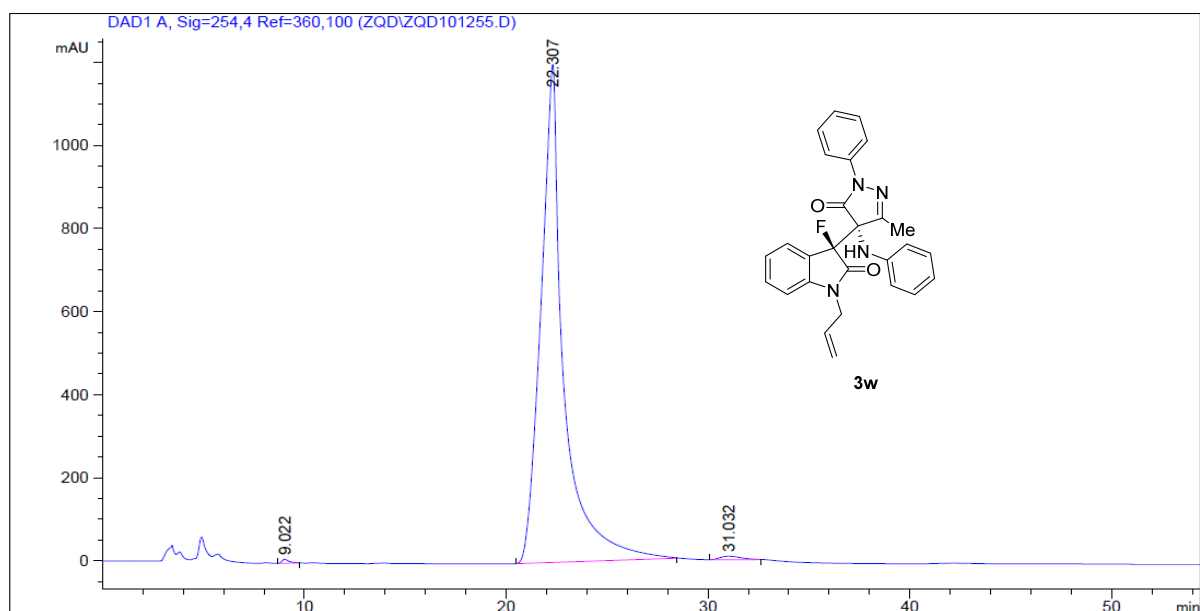

| Peak # | RetTime [min] | Type | Width [min] | Area [mAU*s] | Height [mAU] | Area %  |
|--------|---------------|------|-------------|--------------|--------------|---------|
| 1      | 9.022         | BB   | 0.3625      | 233.52469    | 9.51062      | 0.2444  |
| 2      | 22.307        | BB   | 1.0430      | 9.46863e4    | 1199.36938   | 99.1045 |
| 3      | 31.032        | BB   | 0.8682      | 622.03369    | 8.49580      | 0.6511  |



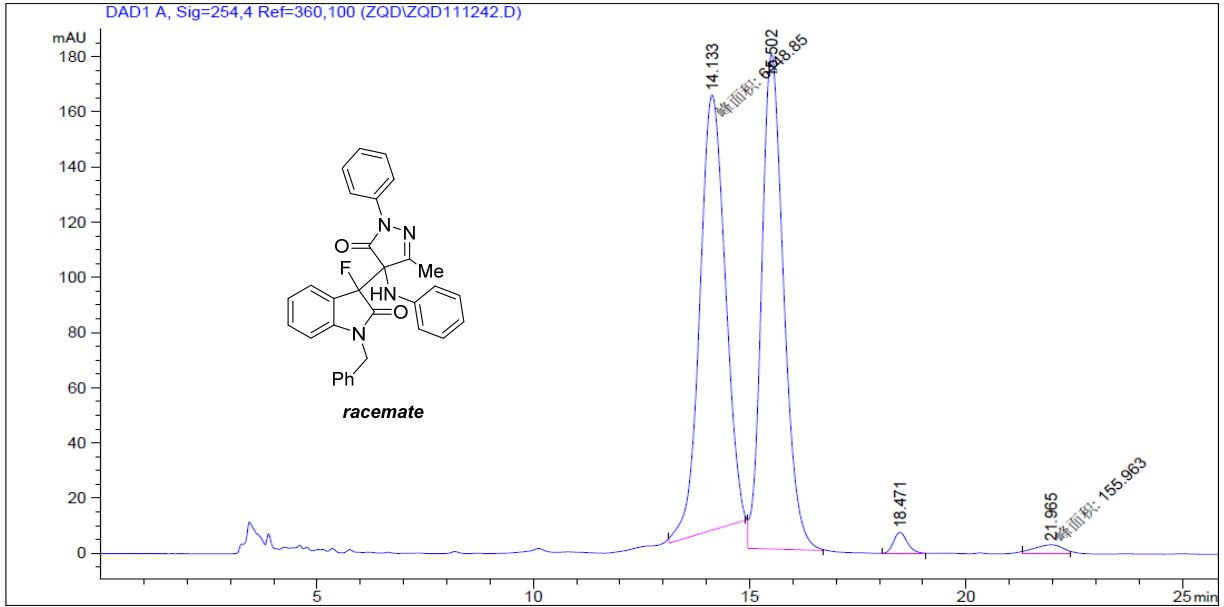

| Peak # | RetTime [min] | Type | Width [min] | Area [mAU*s] | Height [mAU] | Area %  |
|--------|---------------|------|-------------|--------------|--------------|---------|
| 1      | 14.133        | MM   | 0.6817      | 6448.85400   | 157.66197    | 49.1050 |
| 2      | 15.502        | VB   | 0.5440      | 6360.57764   | 179.25342    | 48.4328 |
| 3      | 18.471        | BB   | 0.3356      | 167.38147    | 7.64107      | 1.2745  |
| 4      | 21.965        | MM   | 0.7643      | 155.96283    | 3.40093      | 1.1876  |

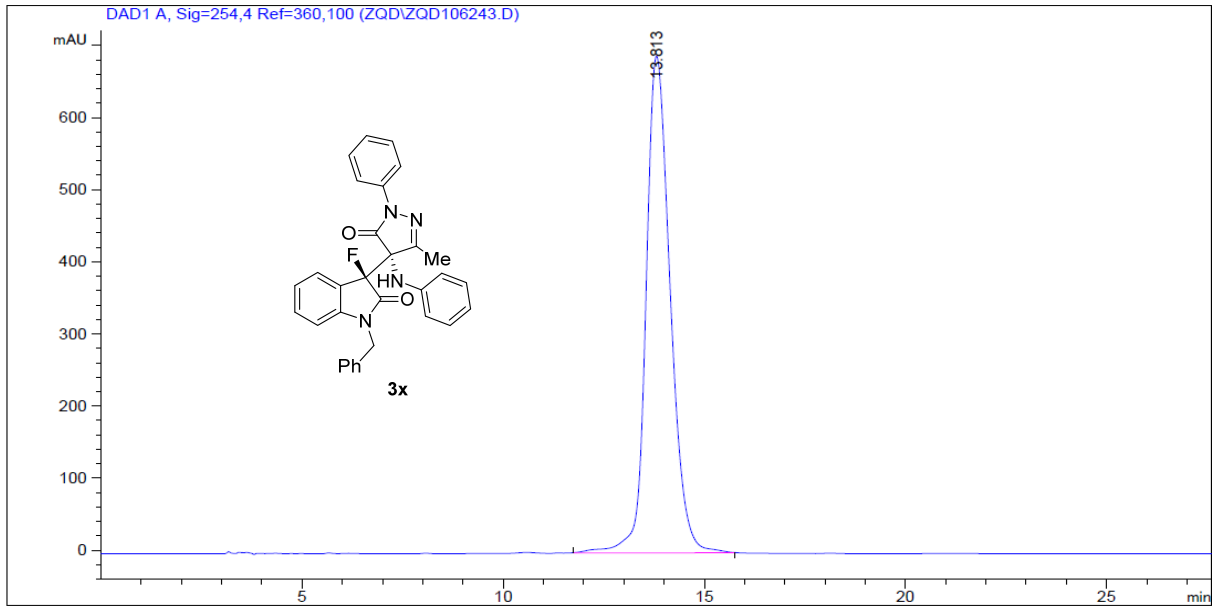

| Peak # | RetTime [min] | Type | Width [min] | Area [mAU*s] | Height [mAU] | Area %   |
|--------|---------------|------|-------------|--------------|--------------|----------|
| 1      | 13.813        | BB   | 0.6434      | 2.88967e4    | 688.80420    | 100.0000 |

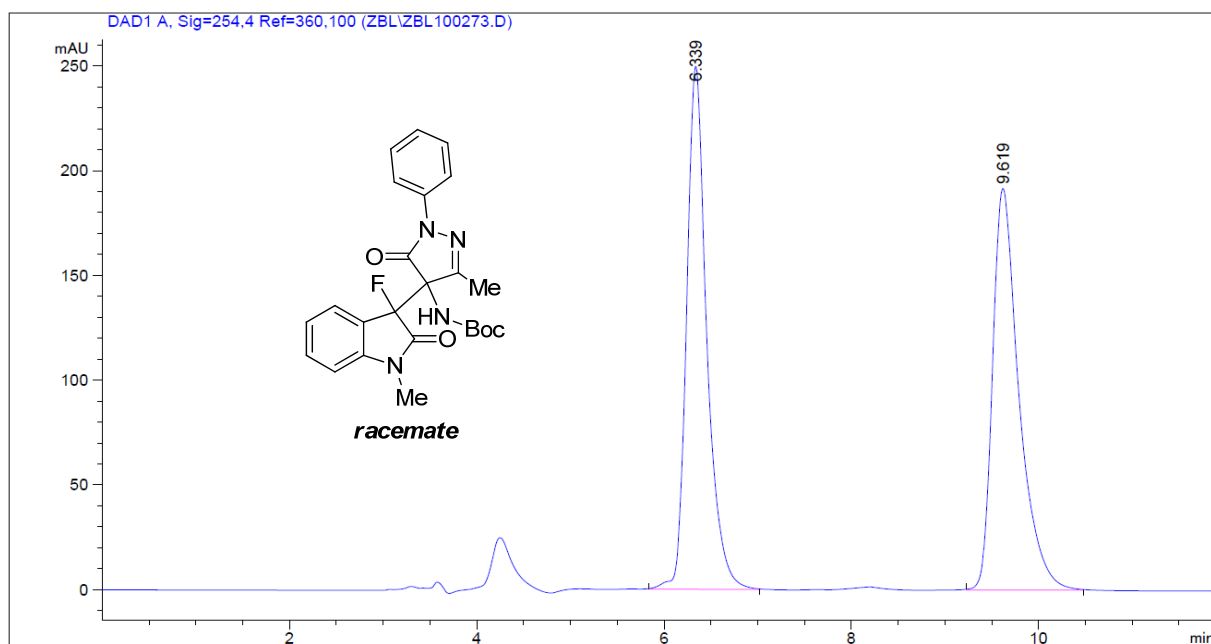

| Peak # | RetTime [min] | Type | Width [min] | Area [mAU*s] | Height [mAU] | Area %  |
|--------|---------------|------|-------------|--------------|--------------|---------|
| 1      | 6.339         | BB   | 0.2247      | 3738.05493   | 249.65070    | 49.8961 |
| 2      | 9.619         | BB   | 0.2925      | 3753.62915   | 191.63785    | 50.1039 |

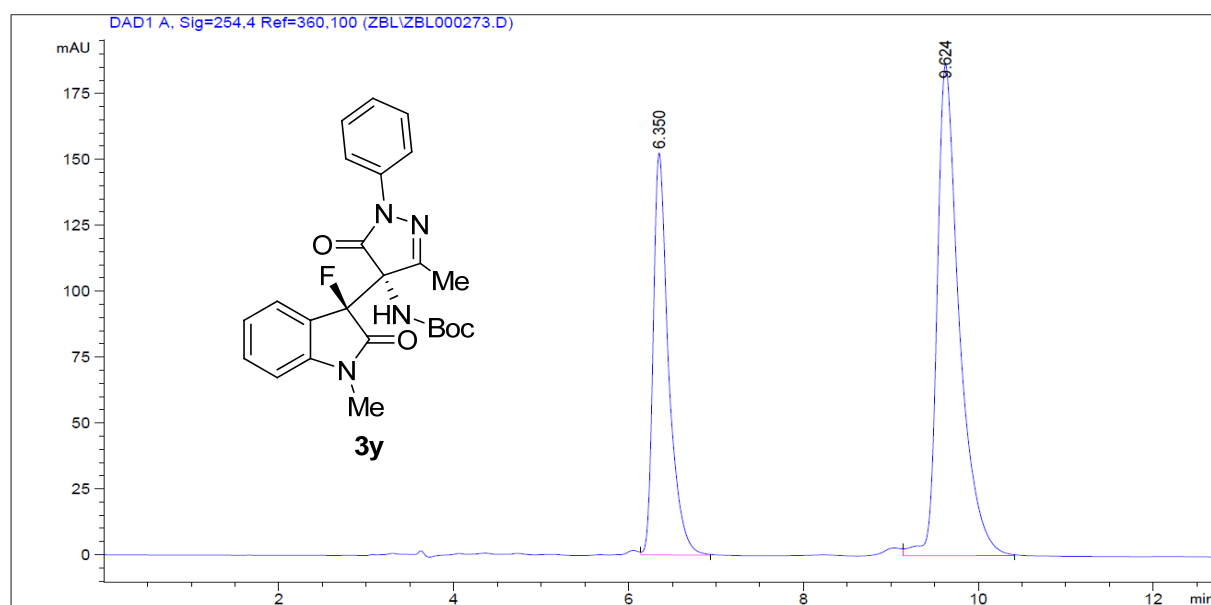

| Peak # | RetTime [min] | Type | Width [min] | Area [mAU*s] | Height [mAU] | Area %  |
|--------|---------------|------|-------------|--------------|--------------|---------|
| 1      | 6.350         | VB   | 0.1802      | 1859.23254   | 152.59227    | 36.0015 |
| 2      | 9.624         | VB   | 0.2590      | 3305.08252   | 186.27971    | 63.9985 |

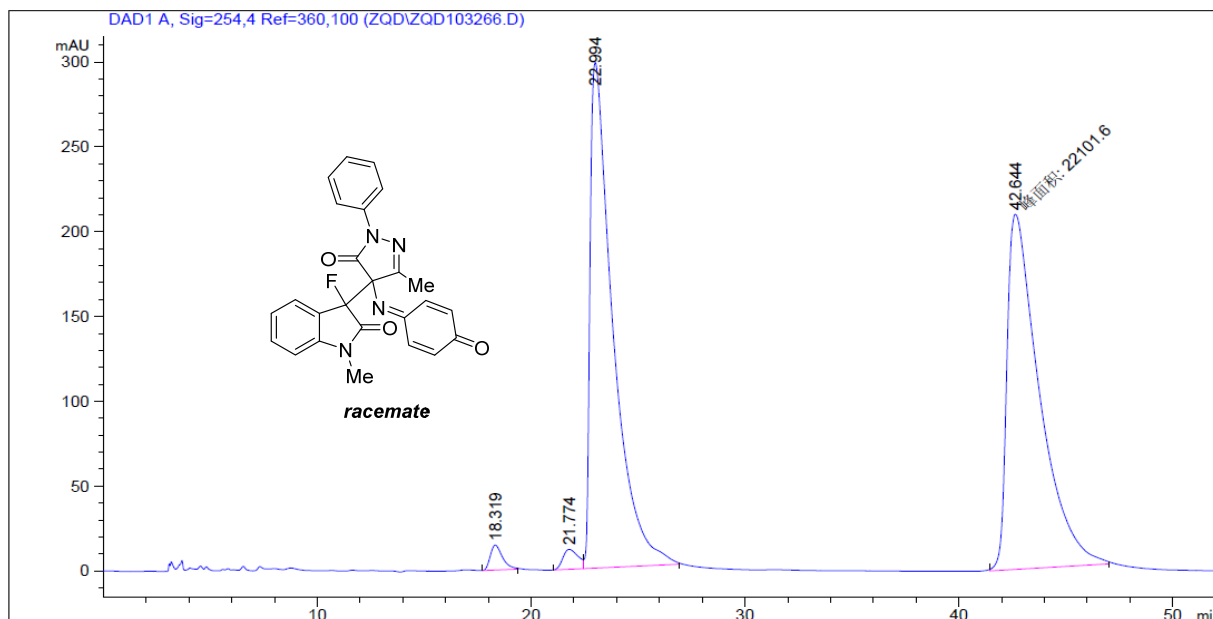

| Peak # | RetTime [min] | Type | Width [min] | Area [mAU*s] | Height [mAU] | Area %  |
|--------|---------------|------|-------------|--------------|--------------|---------|
| 1      | 18.319        | BB   | 0.5936      | 581.98480    | 14.70881     | 1.2838  |
| 2      | 21.774        | BV   | 0.7228      | 576.01465    | 11.73281     | 1.2707  |
| 3      | 22.994        | VB   | 1.0497      | 2.20716e4    | 298.13214    | 48.6896 |
| 4      | 42.644        | MM   | 1.7590      | 2.21016e4    | 209.41531    | 48.7559 |

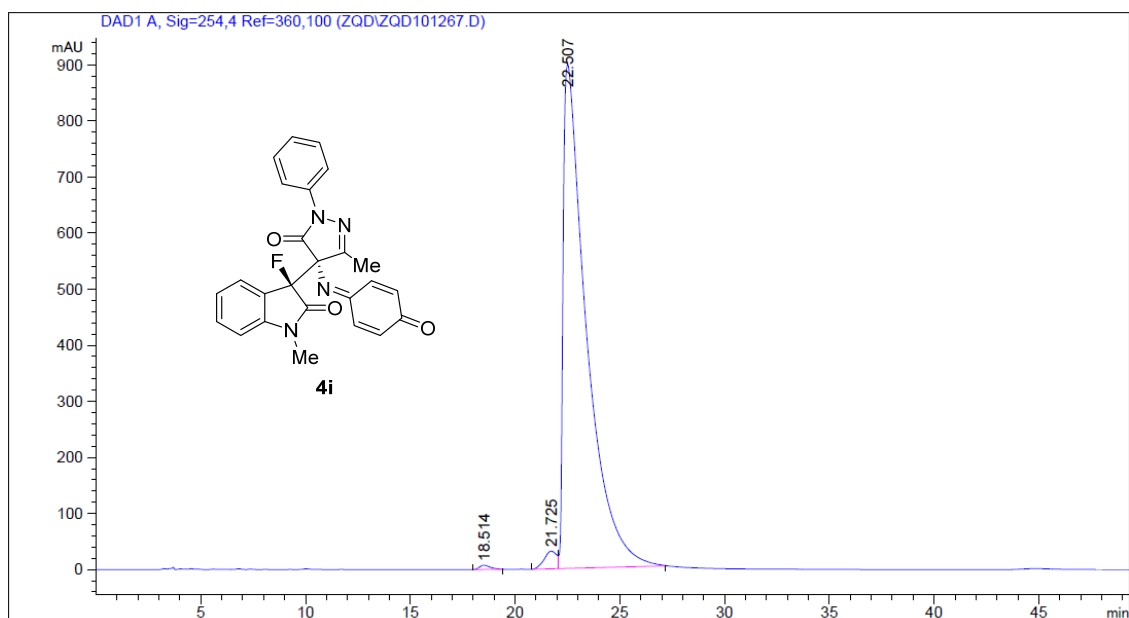

| Peak # | RetTime [min] | Type | Width [min] | Area [mAU*s] | Height [mAU] | Area %  |
|--------|---------------|------|-------------|--------------|--------------|---------|
| 1      | 18.514        | BB   | 0.5286      | 271.26550    | 7.56021      | 0.3844  |
| 2      | 21.725        | BV   | 0.6244      | 1294.98901   | 31.44894     | 1.8353  |
| 3      | 22.507        | VB   | 1.0887      | 6.89941e4    | 899.71576    | 97.7803 |

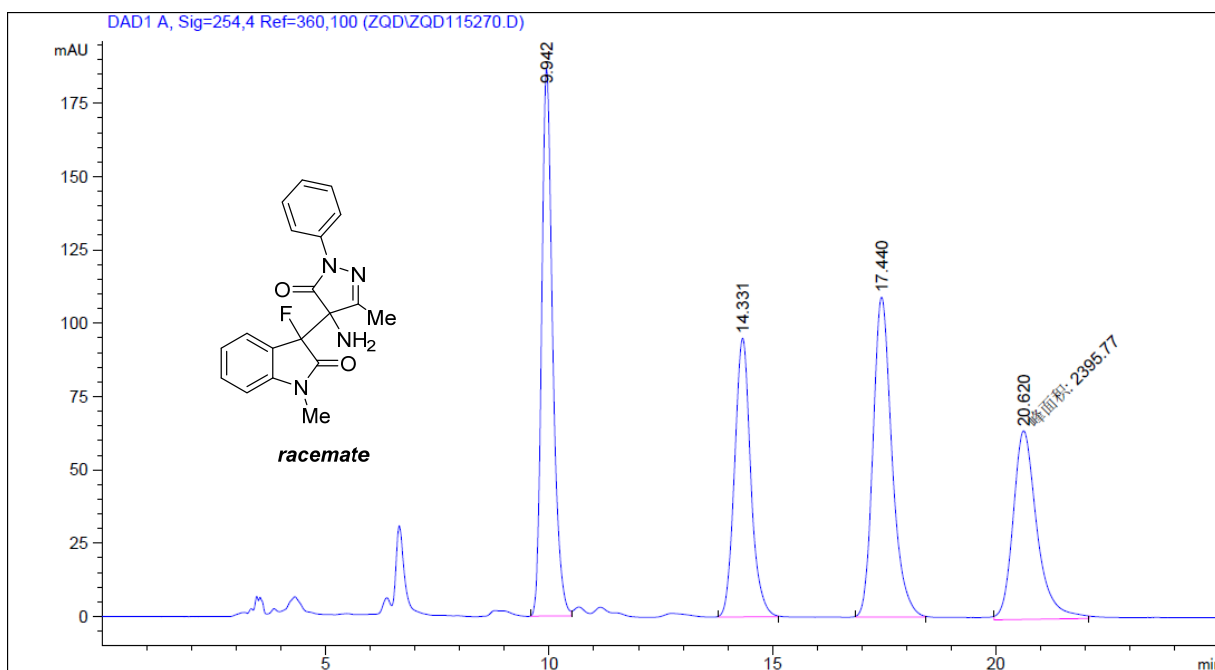

| Peak # | RetTime [min] | Type | Width [min] | Area [mAU*s] | Height [mAU] | Area %  |
|--------|---------------|------|-------------|--------------|--------------|---------|
| 1      | 9.942         | BV   | 0.2614      | 3224.00806   | 186.72260    | 28.7145 |
| 2      | 14.331        | BB   | 0.3855      | 2391.47046   | 95.05723     | 21.2995 |
| 3      | 17.440        | BB   | 0.4499      | 3216.56323   | 109.13490    | 28.6482 |
| 4      | 20.620        | MM   | 0.6210      | 2395.76831   | 64.29482     | 21.3378 |

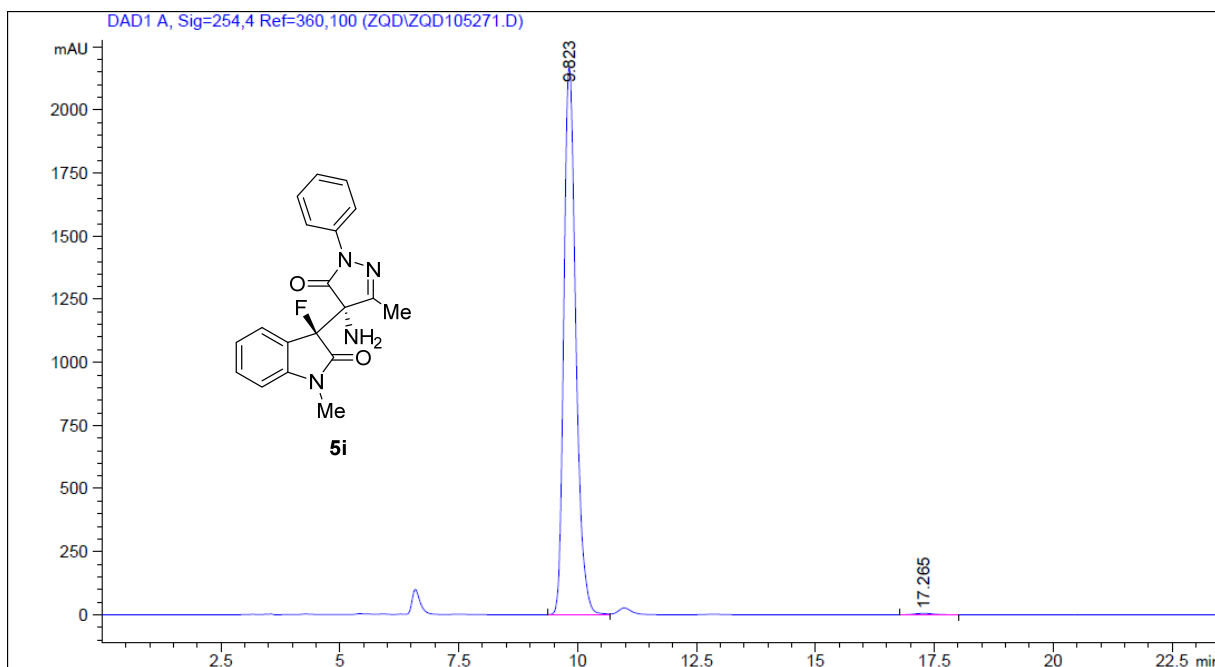

| Peak # | RetTime [min] | Type | Width [min] | Area [mAU*s] | Height [mAU] | Area %  |
|--------|---------------|------|-------------|--------------|--------------|---------|
| 1      | 9.823         | BV   | 0.2695      | 3.82099e4    | 2169.16821   | 99.6090 |
| 2      | 17.265        | BB   | 0.4247      | 150.00024    | 5.32477      | 0.3910  |
